# Supplementary material for: Improving the perception of respect for and the dignity of inpatients: a systematic review
Source: PubMed Central journal article supplement — BMJ Open. 2022 May 12;12(5):e059129. doi: 10.1136/bmjopen-2021-059129 (PMC9109089; doi:10.1136/bmjopen-2021-059129), 2022-05-12
Supplement: bmjopen-2021-059129.draft_revisions.pdf [file bmjopen-2021-059129.draft_revisions.pdf]

# BMJ Open

BMJ Open is committed to open peer review. As part of this commitment we make the peer review history of every article we publish publicly available.

When an article is published we post the peer reviewers' comments and the authors' responses online. We also post the versions of the paper that were used during peer review. These are the versions that the peer review comments apply to.

The versions of the paper that follow are the versions that were submitted during the peer review process. They are not the versions of record or the final published versions. They should not be cited or distributed as the published version of this manuscript.

BMJ Open is an open access journal and the full, final, typeset and author-corrected version of record of the manuscript is available on our site with no access controls, subscription charges or pay-per-view fees (<http://bmjopen.bmj.com>).

If you have any questions on BMJ Open's open peer review process please email [info.bmjopen@bmj.com](mailto:info.bmjopen@bmj.com)

# BMJ Open

## Improving the perception of respect for and the dignity of inpatients: A Systematic Review

|                               |                                                                                                                                                                                                                             |
|-------------------------------|-----------------------------------------------------------------------------------------------------------------------------------------------------------------------------------------------------------------------------|
| Journal:                      | <i>BMJ Open</i>                                                                                                                                                                                                             |
| Manuscript ID                 | bmjopen-2021-059129                                                                                                                                                                                                         |
| Article Type:                 | Original research                                                                                                                                                                                                           |
| Date Submitted by the Author: | 11-Nov-2021                                                                                                                                                                                                                 |
| Complete List of Authors:     | E. P. Dutra, Pablo; UFRJ, INSTITUTE OF PSYCHIATRY OF UFRJ (IPUB/UFRJ)<br>Quagliato, Laiana; UFRJ, Institute of Psychiatry of UFRJ (IPUB/UFRJ)<br>Nardi, AE; Universidade Federal do Rio de Janeiro, Institute of Psychiatry |
| Keywords:                     | MENTAL HEALTH, MEDICAL ETHICS, MEDICAL EDUCATION & TRAINING, PSYCHIATRY, PUBLIC HEALTH, QUALITATIVE RESEARCH                                                                                                                |
|                               |                                                                                                                                                                                                                             |

SCHOLARONE™  
Manuscripts

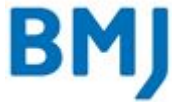

I, the Submitting Author has the right to grant and does grant on behalf of all authors of the Work (as defined in the below author licence), an exclusive licence and/or a non-exclusive licence for contributions from authors who are: i) UK Crown employees; ii) where BMJ has agreed a CC-BY licence shall apply, and/or iii) in accordance with the terms applicable for US Federal Government officers or employees acting as part of their official duties; on a worldwide, perpetual, irrevocable, royalty-free basis to BMJ Publishing Group Ltd ("BMJ") its licensees and where the relevant Journal is co-owned by BMJ to the co-owners of the Journal, to publish the Work in this journal and any other BMJ products and to exploit all rights, as set out in our [licence](#).

The Submitting Author accepts and understands that any supply made under these terms is made by BMJ to the Submitting Author unless you are acting as an employee on behalf of your employer or a postgraduate student of an affiliated institution which is paying any applicable article publishing charge ("APC") for Open Access articles. Where the Submitting Author wishes to make the Work available on an Open Access basis (and intends to pay the relevant APC), the terms of reuse of such Open Access shall be governed by a Creative Commons licence – details of these licences and which [Creative Commons](#) licence will apply to this Work are set out in our licence referred to above.

Other than as permitted in any relevant BMJ Author's Self Archiving Policies, I confirm this Work has not been accepted for publication elsewhere, is not being considered for publication elsewhere and does not duplicate material already published. I confirm all authors consent to publication of this Work and authorise the granting of this licence.

**TITLE PAGE****Title: Improving the perception of respect for and the dignity of inpatients: A Systematic Review****Author name:**

Pablo Eduardo Pereira Dutra

**Co-authors' names:**

Laiana Azevedo Quagliato

Antonio Egidio Nardi

**Corresponding author:**

**Full name:** Pablo Eduardo Pereira Dutra

ORCID: 0000-0003-3970-5668

**Postal address:** Av. Venceslau Brás, 71, Botafogo, Rio de Janeiro, RJ, Brazil

ZIP Code: 22.290-140

**E-mail:** [pablo.medicinaufrj@gmail.com](mailto:pablo.medicinaufrj@gmail.com)

**Phone:** +55 21 3938-0500

**Fax:** +55 21 3938 0500

**Institution:**

Federal University of Rio de Janeiro (UFRJ)

Laboratory of Panic and Respiration (LABPR)

Institute of Psychiatry of UFRJ (IPUB/UFRJ)

**Full names, institutions, city, and country of all co-authors:**

**Full name:** Laiana Azevedo Quagliato

ORCID: 0000-0002-6928-5847

**Institution:**

Federal University of Rio de Janeiro (UFRJ)

Laboratory of Panic and Respiration (LABPR)

Institute of Psychiatry of the UFRJ (IPUB)

**City:** Rio de Janeiro

**Country:** Brazil

Full name: Antonio Egidio Nardi

ORCID: 0000-0002-2152-4669

**Institution:**

Federal University of Rio de Janeiro (UFRJ)

Laboratory of Panic and Respiration (LABPR)

Institute of Psychiatry of the UFRJ (IPUB)

**City:** Rio de Janeiro

**Country:** Brazil

**Keywords (MeSH terms):** Respect, Dignity, Patient rights, inpatients, privacy

**Word count:** 4,868

## Improving the perception of respect for and the dignity of inpatients: A Systematic Review

### ABSTRACT

**Objectives:** The aim of this systematic review is to find international evidence to determine which strategies are effective for improving hospitalized patients' perception of respect and dignity.

**Methods:** A systematic review of the international literature was conducted in accordance with PRISMA 2020 guidelines and registered at PROSPERO (CRD42021241805). The MEDLINE/PubMed, PsycINFO and Cochrane Library databases were searched for observational studies, prospective studies, retrospective studies, controlled trials, and randomized controlled trials with interventions focused on improving respect for patients and maintaining their dignity. Studies with case report designs, editorials, opinion articles, studies <10 subjects, responses/replies to authors, and responses/replies to editors were excluded. The study population included patients admitted to hospitals, day hospitals, clinics, emergency departments, psychiatric emergencies, psychiatric hospitals, asylums, and any other places where there were inpatients. Systematic reviews were not included. Two evaluators assessed risk of bias using the following criteria from the Cochrane Handbook of Systematic Reviews of Interventions version 6.2: methods for allocation, methods for randomization, blinding, and evaluation of internal validity. The reviewers were blinded during the selection of studies as well as during the quality appraisal. Disagreements were resolved by consensus after the reviewers' judgment.

**Results:** A total of 2,515 articles were retrieved from the search to databases, and 44 articles were included in this review. We conducted a quality appraisal of the studies (27 qualitative studies, 14 cross-sectional studies, 1 cohort study, 1 quali-quantitative study and 1 convergent parallel mixed-method study).

**Conclusion:** There are many strategies that could be used to improve the perception of respect for and the maintenance of the dignity of the inpatient. The lack of interventional studies measuring effects in this field has led to a gap in knowledge that needs to be filled with studies with better designs and effect measurements.

**Keywords:** Respect, Dignity, Patient rights, inpatients, privacy

### STRENGTHS AND LIMITATIONS OF THIS STUDY

- This study covers a wide range of topics related to the respect and dignity of inpatients, reaching many countries around the world on virtually every continent.
- It fills a knowledge gap in an area that lacks more research and development.
- We bring important information on medical education in order to improve medical practice.
- More studies with controlled interventions and outcomes are necessary.
- It may not be appropriate to generalize these findings to all countries and cultures.

### INTRODUCTION

Dignity is a fundamental human right (1), and its maintenance is an ethical goal of care (2). The Brazilian Code of Medical Ethics (3) states that physicians must respect and act in patients' benefit. The Declaration on the Promotion of Patients' Rights in Europe (4), states that one of its objectives is "*to reaffirm fundamental human rights in health care*".

The concept of dignity is still not clearly defined (5), and it can be affected during hospitalization (6). Hospital routines are needed to promote and protect patient health, but they can be harmful when patients experience stigma (7), violation of rights, privacy, integrity, disrespect and breaches in confidentiality, and when facing unprepared and insecure professionals who cannot provide clear explanations about diagnostic and therapeutic

1 procedures. All of these can lead to complaints, which can be used as a tool for improving  
2 patient care (8).

### 3 4 5 **OBJECTIVE**

6 The aim of this systematic review is to evaluate worldwide evidence to determine which  
7 strategies can be used to improve inpatient patients' perception of respect and dignity.  
8

### 9 10 **STUDY DESIGN**

11 A systematic review with the aim of identifying, analyzing, extracting and evaluating data from  
12 the international literature related to respect for and maintenance of the dignity of hospitalized  
13 patients. It also aims to identify knowledge gaps and relate the findings to clinical practices to  
14 improve the quality of care for all hospitalized patients worldwide.  
15

### 16 17 **METHODS**

18 This study was registered at PROSPERO (CRD42021241805) and conducted following  
19 PRISMA guidelines (9). Articles were identified by searching electronic records, including the  
20 MEDLINE/PubMed, PsycINFO and Cochrane Library databases. The quoted search terms  
21 used were as follows: Patient human rights violation OR Patient disrespect OR Patient violation  
22 of dignity OR Patient rights protection OR patient intimacy violation OR patient confidentiality  
23 violation OR ethical violation OR ethics violation OR hospital violation of patients' rights OR  
24 patients' perception of rights violation OR patients' perception of disrespect. There were no  
25 restrictions on year or language of publication, and no automation tool was used. The main  
26 objective was to find any interventions and multifaceted interventions aimed at improving  
27 inpatients' perception of respect and dignity and decreasing disrespect or human/inpatient  
28 rights violations, intimacy violations, confidentiality violations, autonomy violations, etc. The  
29 search included interventions conducted in hospitals, day hospitals, clinics, emergency  
30 departments, psychiatric emergencies, psychiatric hospitals, asylums, and any other places  
31 where there are inpatients. The inclusion criteria were full text, observational studies,  
32 prospective studies, retrospective studies, controlled trials, and randomized controlled trials.  
33 The exclusion criteria were case reports, editorials, opinion articles, studies <10 subjects,  
34 responses/replies to authors, and responses/replies to editors.  
35

36 The first author (PEPD) screened the titles and abstracts of the articles and manually excluded  
37 those articles that did not fit the inclusion criteria.

38 After that, two reviewers (PEPD and LAQ) independently assessed the full texts of the  
39 remaining articles for eligibility in a standardized manner: data extraction was performed  
40 independently, and disagreements between reviewers regarding the study selection or data  
41 extraction were resolved by consensus. If a consensus was not reached, the third reviewer  
42 (AEN) was consulted.  
43

44 The following information was extracted from the full-text articles using an Excel spreadsheet:  
45 authors, place/year of publication, sample size, type of samples, study design, analysis,  
46 data/measure, strategies, interventions to achieve improvements, and limitations.  
47

48 Two reviewers assessed the risk of bias using the following criteria from the Cochrane  
49 Handbook of Systematic Reviews of Interventions version 6.2 (10). Disagreements were  
50 resolved by consulting a third reviewer. The minimum number of studies for data to be pooled  
51 was 10, including any intervention that would be effective for improving the perception of  
52 respect and dignity among inpatients.  
53

54 A quality appraisal of the articles was performed using the CASP Qualitative Studies Checklist  
55 (11), Specialist Unit for Review Evidence (SURE) 2018 (12), CASP Cohort Study Checklist  
56 (13), and Mays & Pope Qualitative research in health care (14).  
57

### 58 59 ***Patient and public involvement***

60 No patient involved.

## RESULTS

Three databases were searched on March 9th, 2021: PubMed/MEDLINE, PsycINFO, and Cochrane Library. Of the 2,515 results, no article was excluded by automation tools, 3 were excluded after searching for duplicate studies using the EndnoteWeb tool, and 2,375 were excluded after title and abstract screening by the first reviewer (PEPD). In the second step, two reviewers (PEPD and LAQ) independently assessed the 121 articles for eligibility.

Thirteen references were not found. The first reviewer (PEPD) contacted by e-mail and/or via ResearchGate - more than once - authors, coauthors, and journals where they were published to try to retrieve them. Up to August 5th, 2021, 9 articles were retrieved, 3 were bought online from publishers, and 1 was not retrieved and excluded. A total of 76 articles were excluded: 50 did not include inpatients, 2 were not in the scope of this review, 4 were review/systematic review, 1 focused on health care professionals, 1 focused on the development of telehealth, 12 were essay/commentary/thoughts, 2 included less than 10 patients, 1 was a study protocol, and 3 were scale developments.

Forty-four articles were included, according to PRISMA 2020 guidelines (9) (figure 1): 14 cross-sectional studies, 1 cohort study, 1 quali-quantitative study, 1 convergent parallel mixed-method study, and 27 qualitative studies. Considering all the studies included, a total of approximately 26,626 participants were included in this review.

**Table 1** shows the design and type of analysis of the qualitative and quantitative studies.

**Table 1: Qualitative and quantitative studies: design and analysis**

| Table 1 - Qualitative and quantitative studies: design and analysis |             |                 |                                                        |             |
|---------------------------------------------------------------------|-------------|-----------------|--------------------------------------------------------|-------------|
| Qualitative                                                         |             |                 |                                                        |             |
|                                                                     | Design      |                 | Type of analysis                                       |             |
|                                                                     | Qualitative | Cross-sectional | 7                                                      | Qualitative |
| Descriptive                                                         |             |                 |                                                        | 3           |
| Descriptive and inferential analysis                                |             |                 |                                                        | 1           |
| Deductive and InductiveThematic content analysis                    |             |                 |                                                        | 1           |
| Qualitative                                                         |             | 27              | Qualitative descriptive and inductive content analysis | 2           |
|                                                                     |             |                 | Thematic content analysis                              | 1           |
|                                                                     |             |                 | Phenomenological hermeneutic analysis                  | 1           |
|                                                                     |             |                 | Qualitative content analysis                           | 3           |
|                                                                     |             |                 | Qualitative                                            | 11          |
|                                                                     |             |                 | Qualitative phenomenological                           | 2           |
|                                                                     |             |                 | Observational qualitative case study                   | 1           |
|                                                                     |             |                 | Qualitative interpretive study                         | 1           |

|                     |                                  |   |                                                                 |   |
|---------------------|----------------------------------|---|-----------------------------------------------------------------|---|
|                     |                                  |   | Qualitative exploratory                                         | 3 |
|                     |                                  |   | Qualitative and quantitative                                    | 1 |
|                     |                                  |   | Qualitative phenomenographical approach                         | 1 |
|                     | <b>Design</b>                    |   | <b>Type of analysis</b>                                         |   |
| <b>Quantitative</b> | Cross-sectional                  | 7 | Comparative                                                     | 1 |
|                     |                                  |   | Multilevel, mixed effects generalized linear regression         | 1 |
|                     |                                  |   | Multivariable longitudinal regression, qualitative              | 1 |
|                     |                                  |   | Bivariate and multivariate analysis                             | 1 |
|                     |                                  |   | Negative binomial regression                                    | 1 |
|                     |                                  |   | Qualitative and quantitative                                    | 1 |
|                     |                                  |   | Qualitative and quantitative (multivariate logistic regression) | 1 |
|                     | Quali-quantitative               | 1 | Quali-quantitative descriptive                                  | 1 |
|                     | Cohort                           | 1 | Quantitative and qualitative                                    | 1 |
|                     | Convergent parallel Mixed-method | 1 | Qualitative and quantitative (multivariate logistic regression) | 1 |

Privacy can be violated in many ways. Patients understood it to be a violation of privacy to provide a list of names for clerics to offer religious support and that patients were both entitled to refuse to have their names posted on a list and to receive religious support (15). For psychiatric patients, for example, it is necessary to know the individual history of each patient and their pattern of behavior, be attentive to the needs of patients during the seclusion process, explain the reasons and ensure that the patients understand the problem (16), and these experiences can be perceived as harmful, humiliating, dehumanizing, unreasonable, or distressing (17). A good communication between health professionals and patients and family members can alleviate parental and patients' anxiety and confusion (18). Likewise, low-risk emergency patients feel powerless, insulted, and humiliated because they do not understand what is happening to them, which violates their self-esteem, making them feel dependent on care, exposed, vulnerable and insecure (19). It is necessary to evaluate nursing procedures in emergencies so that patients feel more welcomed and less vulnerable. Patients of different ethnicities report similar experiences, and they considered important definitions of respect and disrespect: being treated like a person and being treated as an equal; being known as a particular individual, avoidance of stereotyping, being treated politely, honest explanations of medical issues, and how lateness is handled (20). To provide patient-centered care, it is necessary to understand how different cultures perceive respect and disrespect.

Seventeen articles focused on abuse and violation of patient rights during pregnancy, partum and postpartum. Training on respectful maternity care (RMC) should be strengthened to include greater focus on counseling skills and rapport building, and that addressing structural



1 issues around provider workload should complement all interventions to improve midwives'  
2 interpersonal interactions with women (21). Likewise, strategies that promote more equitable  
3 pay, offer rotational schedules with short-term respite away from providing maternity care, and  
4 increased access to mentoring and peer-to-peer learning platforms may improve RMC and  
5 uptake of facility delivery in low-resource settings and that an enhanced understanding of the  
6 relationships between patient and provider characteristics may improve the provision of quality  
7 labor and delivery services and should be considered in the design of maternity care programs,  
8 policies, and future research (22). For example, 20% of the women reported disrespect and  
9 abuse while receiving care during labor and delivery. Policies and practices aimed at ensuring  
10 universal coverage for institutional deliveries need to promote RMC for women in all health  
11 facilities. A sustainable increase in institutional delivery requires ensuring quality,  
12 compassionate and caring services in all health facilities (23,24). A good communication  
13 between mothers and providers is critical for building mothers' confidence, promoting bonding  
14 and participation of mothers in the care of their baby and may have long-term benefits for the  
15 health and well-being of the mother and her baby (25). In Jordan, the lack of privacy during  
16 labor and birth makes women pay for privacy, looking for private hospitals, although it was  
17 not always achieved at those facilities. Some simple strategies could improve privacy, such as  
18 being covered by a sheet; however, even simple practices are difficult to change (26). Likewise,  
19 weight stigma may be a common experience in pregnancy and postpartum health care and that  
20 providers need additional training to avoid stigmatizing their patients and inadvertently  
21 undermining patient-provider relationships, quality of care, and health outcomes (27). Health  
22 care providers are not aware of the most essential aspects of RMC, exposing the need to  
23 promote the RMC charter among both women who seek care and health care providers (28).  
24 Social status, level of education and age of women were perceived to influence the quality of  
25 care they received, so improving women's experience of maternal care requires targeted  
26 interventions at the interpersonal level between a woman and her health care providers (29).  
27 The absence of caring behaviors from midwives elicited distress and negative responses from  
28 women in labor (30). Disrespectful and abusive treatment during childbirth is an important  
29 factor in reducing women's confidence in health facilities, so improving interpersonal care  
30 must be an integral part of quality improvement in maternal health (31). For these reasons,  
31 providers, women and their families must be made aware of women's rights to respectful care  
32 (32). For example, women have the right to be seen as partners in the care process and not  
33 subordinate to care providers (33). Most conflicts were related to feelings of being  
34 un/misinformation by health care personnel, disrespected and objectified, lack of support, and  
35 various problems during childbirth and postpartum (34). In rural Afghanistan, the local  
36 recruitment and professional education of midwives were successful for promoting utilization  
37 and satisfaction with maternal and neonatal health services. Nevertheless, the quality of the  
38 services is still lacking, with some women complaining of disrespectful care (35). Mistreatment  
39 is experienced more frequently by women of color, when birth occurs in hospitals, and among  
40 those with social, economic or health challenges, it is exacerbated by unexpected obstetric  
41 interventions and by patient-provider disagreements (36). A study conducted in Peru to assess  
42 the prevalence of disrespect and abuse during childbirth found that the majority of participants  
43 had experienced at least one category of disrespect and abuse during childbirth care (37). All  
44 these studies are in accordance with the recommendations provided by the World Health  
45 Organization (WHO) (38,39), i.e., working to improve the quality of assistance to women  
46 during pregnancy, labor and postpartum, and their children. Understanding the roots of  
47 disrespect and lack of dignity are essential to raising the quality of care provided to women  
48 around the world. As seen in the cited articles, the treatment given to women during pregnancy,  
49 childbirth and postpartum is crucial for women to seek help when they need it. It is necessary  
50 to correct the attitude of health professionals since training so that this kind of abusive and  
51 disrespectful attitude is not perpetuated.  
52 Among general hospitals and other health care providers, the situation is not much different.  
53 The viewpoints of nurses and patients provide knowledge of how undignified behaviors could

1  
2  
3  
4  
5  
6  
7  
8  
9  
10  
11  
12  
13  
14  
15  
16  
17  
18  
19  
20  
21  
22  
23  
24  
25  
26  
27  
28  
29  
30  
31  
32  
33  
34  
35  
36  
37  
38  
39  
40  
41  
42  
43  
44  
45  
46  
47  
48  
49  
50  
51  
52  
53  
54  
55  
56  
57  
58  
59  
60

be reduced in cross-cultural health care settings. Behaviors perceived as undignified primarily by nurses or patients might result from differences in social roles and responsibilities (40). Likewise, health disparities may contribute to negative perceptions of disrespect or of receiving unfair treatment, particularly among racial/ethnic minorities (41). This indicates that almost no patient is satisfied with the quality of services, and to improve the quality of the assistance, health care professionals must be aware of the factors that violate or preserve dignity from the patient's perspective (42). Likewise, patients voiced concerns addressing interpersonal issues, which can be improved with efforts to address technology access and availability, as well as empathy and communication strategies (43). These complaints could be mitigated if health-care professionals took a more active role in identifying and responding to patients who are experiencing dissatisfaction, even when they are not actively complaining (44). These negative tensions can be mitigated by approaches that aim to push improvement in patient safety through their involvement, so a more collaborative approach, that encourages patients and health care staff to work together, is needed (45). These findings imply sensitizing managers toward providing appropriate conditions and educating nurses to observe patients' rights (46). The pilgrimage of patients among health facilities is the greatest expression of unfair inequalities, sustained by structural factors such as the precarious conditions of health services (47).

Another concern for patients is information, and medical facilities should devote every effort to alleviate patients' concerns about the invasion of their information privacy to avoid eroding the reputation of medical facilities and impeding the promotion of electronic medical records (48), because patients bring expectations for hospitals related to safety, respect, dignity, care, and information (49). For instance, small attitudes of the nursing staff, such as touching the patient's possessions without permission and exposing the patient, caused discomfort and violated patient privacy (50). It only stresses the importance to give information about ethical and legal issues related to privacy and confidentiality before and during hospitalization (51). For example, in Greece, patients were quite unaware of their rights (52). Nurses play an important role in disseminating ethical principles and establishing a respectful relationship with patients (53), and they need to improve their approaches to patient privacy (54). Likewise, patients believe that privacy is linked to dignity and respect, and that these concepts and attitudes are connected and essential to protect privacy in the hospital context (55).

A study in the intensive care unit (ICU) found that all patients recollected memories with strong feelings about the ICU environment, such as hostility and stress (56). Negative feelings were associated with violation of dignity and privacy, lack of empathy, not being understood, delays in obtaining support, and total control by the health care staff. The majority of patients are unaware of their rights, and these rights are not respected in the provision of care (57). For example, patients who had a methicillin-resistant *S. aureus* (MRSA) notification card felt discriminated against, making its use questionable (58). That is why it is imperative that caregivers are aware of patients' conceptions of integrity to identify and preserve it and so that they treat them in accordance with moral integrity (59). Physician behaviors should be useful in developing curricula related to professionalism, communication skills, and practice-based learning (60).

All these findings are in line with what is described in the current literature: more computerized resources will be needed to maintain the privacy of patient data (61); dignity and autonomy are intertwined and can positively impact the quality of care from the patients' point of view (62); and empathic, non possessive, respectful and authentic care has a significant effect on treatment outcomes (63). Thus, the dynamics of the provider-patient relationship is an important therapeutic factor that contributes at the clinical level to the approach and information of the patient in the area of general health and not just in mental health.

### ***Quality appraisal***

A critical appraisal of the included studies was performed, but no study was excluded based on its score, although this approach makes their analysis more robust. The instruments used for it were: CASP Qualitative Studies Checklist (11) (**Table 2**); Specialist Unit for Review Evidence

(SURE) - Questions to assist with the critical appraisal of cross-sectional Studies (12) (**Table 3**); CASP Cohort Studies Checklist (13) and the criteria put forth by Mays & Pope (2000) (14) (**Table 4**). At the bottom of each table are the scores for quality assessment.

They were scored as follows: 0 = not or inadequately addressed, 1 = partially addressed, and 2 = fully addressed criterion.

The quality assessment of the studies and of the systematic review was performed by two reviewers independently (PEPD and LAQ), who then discussed and agreed to the final rating. No study was excluded for quality reasons, but this assessment enabled a more robust review of the studies.

**Table 2: CASP - Qualitative studies**

| Table 2 - CASP Qualitative Studies Checklist (CRITICAL APPRAISAL SKILLS PROGRAMME) |      |         |                    |                      |                 |                      |                |               |                       |                         |       |
|------------------------------------------------------------------------------------|------|---------|--------------------|----------------------|-----------------|----------------------|----------------|---------------|-----------------------|-------------------------|-------|
|                                                                                    | Aims | Methods | Design and Methods | Recruitment strategy | Data collection | Bias and Reflexivity | Ethical issues | Data analysis | Statement of findings | Value and applicability | Score |
| Tsai Y. F. et al (2020)                                                            | 1    | 1       | 1                  | 2                    | 2               | 1                    | 2              | 1             | 2                     | 2                       | 15    |
| Beach M. C. et al (2017) (a)                                                       | 1    | 1       | 1                  | 1                    | 1               | 0                    | 1              | 1             | 1                     | 1                       | 9     |
| Adolfsson A. et al (2012)                                                          | 2    | 2       | 2                  | 2                    | 2               | 1                    | 1              | 1             | 2                     | 2                       | 17    |
| Torabizadeh C. et al (2012)                                                        | 2    | 2       | 2                  | 2                    | 2               | 1                    | 2              | 2             | 2                     | 2                       | 19    |
| Pomerantz S. C. et al (2006) (a)                                                   | 2    | 2       | 2                  | 1                    | 1               | 1                    | 2              | 2             | 1                     | 2                       | 16    |
| Faschingbauer KM et al (2013) (a)                                                  | 2    | 2       | 2                  | 1                    | 1               | 1                    | 2              | 2             | 2                     | 2                       | 17    |
| Fleury S. et al (2013) (a)                                                         | 2    | 2       | 2                  | 1                    | 1               | 1                    | 2              | 1             | 1                     | 1                       | 14    |
| Gebremichael M.W. et al (2018) (a)                                                 | 2    | 1       | 1                  | 1                    | 1               | 1                    | 2              | 2             | 2                     | 2                       | 15    |
| Haskins L. et al (2019)                                                            | 2    | 2       | 2                  | 1                    | 2               | 1                    | 2              | 2             | 2                     | 2                       | 18    |
| Howard M. et al (2013)                                                             | 2    | 1       | 1                  | 2                    | 1               | 1                    | 2              | 1             | 1                     | 1                       | 13    |
| Evan E. E. et al (2007) (a)                                                        | 2    | 2       | 2                  | 2                    | 1               | 1                    | 2              | 2             | 1                     | 2                       | 17    |
| Hussein S. A. A. et al (2019)                                                      | 2    | 2       | 2                  | 2                    | 1               | 2                    | 2              | 1             | 2                     | 2                       | 18    |
| Aminu M. et al (2019)                                                              | 2    | 2       | 2                  | 2                    | 2               | 1                    | 2              | 2             | 2                     | 2                       | 19    |
| Kanengoni B. et al (2019) (a)                                                      | 2    | 2       | 1                  | 2                    | 1               | 1                    | 2              | 2             | 2                     | 2                       | 17    |
| Mohammadi E. et al (2017)                                                          | 2    | 2       | 2                  | 2                    | 2               | 1                    | 2              | 1             | 1                     | 1                       | 16    |
| Khresheh R. et al (2019) (a)                                                       | 2    | 2       | 1                  | 2                    | 1               | 1                    | 2              | 2             | 2                     | 2                       | 17    |
| Horwitz L. I. et al (2010)                                                         | 2    | 2       | 2                  | 2                    | 2               | 1                    | 2              | 2             | 2                     | 2                       | 19    |
| Dzomeku V.M. et al (2017)                                                          | 2    | 2       | 2                  | 2                    | 2               | 1                    | 2              | 2             | 2                     | 2                       | 19    |
| Wei H. et al (2019)                                                                | 2    | 2       | 2                  | 2                    | 2               | 1                    | 2              | 2             | 2                     | 2                       | 19    |
| Pupulim J. S. L. et al (2012)                                                      | 2    | 2       | 2                  | 2                    | 2               | 1                    | 2              | 1             | 1                     | 2                       | 17    |
| Robins C. S. et al (2005)                                                          | 2    | 2       | 2                  | 1                    | 1               | 1                    | 1              | 2             | 1                     | 1                       | 14    |
| Hernández-Martínez A et al (2019) (a)                                              | 2    | 2       | 2                  | 2                    | 1               | 1                    | 2              | 2             | 2                     | 2                       | 18    |
| Wofford M et al (2004)                                                             | 2    | 1       | 1                  | 1                    | 2               | 0                    | 1              | 1             | 0                     | 1                       | 10    |
| Thommesen T. et al (2020)                                                          | 2    | 2       | 2                  | 1                    | 2               | 1                    | 1              | 2             | 1                     | 2                       | 16    |
| Widäng I et al (2003)                                                              | 2    | 2       | 2                  | 2                    | 2               | 1                    | 2              | 2             | 2                     | 2                       | 19    |

|                                                                                   |               |                   |                         |                      |   |                                              |                                     |                               |   |   |    |
|-----------------------------------------------------------------------------------|---------------|-------------------|-------------------------|----------------------|---|----------------------------------------------|-------------------------------------|-------------------------------|---|---|----|
| Hrisos S (2013)                                                                   | 2             | 2                 | 1                       | 2                    | 2 | 2                                            | 2                                   | 1                             | 2 | 2 | 18 |
| Merakou K. et al (2001)                                                           | 2             | 2                 | 2                       | 2                    | 1 | 1                                            | 0                                   | 1                             | 2 | 1 | 14 |
| (a) Did not cite explicitly the data collection date/time frame (e.g. month/year) | <b>Scores</b> | 0–7 = low quality | 8–14 = moderate quality | 15–20 = high quality |   | 0 = not or inadequately addressed or applied | 1 = adequately addressed or applied | 2 = well addressed or applied |   |   |    |

**Table 3: SURE - Cross-sectional studies**

|                                              | Table 3 - Specialist Unit for Review Evidence (SURE) - Questions to assist with the critical appraisal of cross-sectional studies |                                  |                       |              |                       |                     |                      |                              |                            |                         |                   |                       |                        |                       |
|----------------------------------------------|-----------------------------------------------------------------------------------------------------------------------------------|----------------------------------|-----------------------|--------------|-----------------------|---------------------|----------------------|------------------------------|----------------------------|-------------------------|-------------------|-----------------------|------------------------|-----------------------|
|                                              | Larijani B et al (2018)                                                                                                           | Montesinos-Segura R et al (2017) | Marin CR et al (2018) | Ma CC (2014) | Dynes MM et al (2018) | Ring D et al (2017) | Lurie N et al (2004) | Gebremichael MW et al (2018) | Rodriguez ACI et al (2020) | Kujawski S et al (2015) | McMahon SA (2014) | Vedams S et al (2019) | Burrows S et al (2017) | Óztürk H et al (2020) |
| <b>Design</b>                                | 2                                                                                                                                 | 2                                | 2                     | 2            | 2                     | 0                   | 2                    | 2                            | 1                          | 2                       | 1                 | 2                     | 2                      | 2                     |
| <b>Question</b>                              | 2                                                                                                                                 | 2                                | 2                     | 2            | 2                     | 2                   | 2                    | 2                            | 2                          | 2                       | 2                 | 2                     | 2                      | 2                     |
| <b>Setting/location</b>                      | 2                                                                                                                                 | 2                                | 2                     | 2            | 2                     | 1                   | 2                    | 2                            | 2                          | 2                       | 2                 | 2                     | 2                      | 2                     |
| <b>Selection</b>                             | 2                                                                                                                                 | 2                                | 2                     | 1            | 2                     | 2                   | 2                    | 2                            | 2                          | 2                       | 2                 | 2                     | 2                      | 2                     |
| <b>Characteristics</b>                       | 2                                                                                                                                 | 2                                | 2                     | 1            | 2                     | 2                   | 2                    | 2                            | 2                          | 2                       | 2                 | 2                     | 2                      | 2                     |
| <b>Exposure &amp; outcomes</b>               | 2                                                                                                                                 | 2                                | 2                     | 1            | 1                     | 2                   | 2                    | 2                            | 2                          | 2                       | 2                 | 2                     | 2                      | 2                     |
| <b>Study size</b>                            | 2                                                                                                                                 | 2                                | 2                     | 2            | 2                     | 2                   | 2                    | 2                            | 2                          | 1                       | 2                 | 2                     | 2                      | 2                     |
| <b>Statistics</b>                            | 2                                                                                                                                 | 2                                | 1                     | 1            | 2                     | 2                   | 1                    | 2                            | 2                          | 2                       | 2                 | 2                     | 1                      | 2                     |
| <b>Eligibility</b>                           | 2                                                                                                                                 | 1                                | 1                     | 1            | 2                     | 2                   | 2                    | 2                            | 2                          | 2                       | 2                 | 2                     | 2                      | 2                     |
| <b>Results</b>                               | 2                                                                                                                                 | 1                                | 1                     | 1            | 2                     | 2                   | 1                    | 2                            | 2                          | 2                       | 1                 | 2                     | 2                      | 2                     |
| <b>Conflict of interest</b>                  | 2                                                                                                                                 | 2                                | 2                     | 2            | 2                     | 0                   | 2                    | 2                            | 2                          | 2                       | 2                 | 2                     | 2                      | 2                     |
| <b>Limitations</b>                           | 0                                                                                                                                 | 2                                | 2                     | 2            | 2                     | 2                   | 2                    | 2                            | 0                          | 2                       | 2                 | 2                     | 2                      | 1                     |
| <b>Total</b>                                 | 22                                                                                                                                | 22                               | 21                    | 18           | 23                    | 19                  | 22                   | 24                           | 21                         | 23                      | 22                | 24                    | 23                     | 23                    |
| <b>Item scores</b>                           | <b>Total scores</b>                                                                                                               |                                  |                       |              |                       |                     |                      |                              |                            |                         |                   |                       |                        |                       |
| 0 = not or inadequately addressed or applied | 0–9 = low quality                                                                                                                 |                                  |                       |              |                       |                     |                      |                              |                            |                         |                   |                       |                        |                       |
| 1 = adequately addressed or applied          | 10–17 = moderate quality                                                                                                          |                                  |                       |              |                       |                     |                      |                              |                            |                         |                   |                       |                        |                       |
| 2 = well addressed or applied                | 18–24 = high quality                                                                                                              |                                  |                       |              |                       |                     |                      |                              |                            |                         |                   |                       |                        |                       |

**Table 4: CASP - Cohort studies and Mays & Pope Criteria**

| CASP Cohort Studies Checklist |                       |  |  | Critical Appraisal according to Mays & Pope (2000) Criteria |                            |                       |
|-------------------------------|-----------------------|--|--|-------------------------------------------------------------|----------------------------|-----------------------|
|                               | Skyman E et al (2014) |  |  |                                                             | Santos LR et al (2005) (a) | Sanson G et al (2020) |

|                                        |    |                                           |             |                                           |             |    |
|----------------------------------------|----|-------------------------------------------|-------------|-------------------------------------------|-------------|----|
| Issue                                  | 2  |                                           |             | <b>Worth or Relevance</b>                 | 2           | 2  |
| Recruitment                            | 2  |                                           |             | <b>Clear question</b>                     | 2           | 2  |
| Exposure                               | 2  |                                           |             | <b>Design</b>                             | 2           | 2  |
| Outcome                                | 2  |                                           |             | <b>Context</b>                            | 2           | 2  |
| Confounding factors identification     | 1  |                                           |             | <b>Sampling</b>                           | 1           | 1  |
| Confounding factors taken into account | 1  |                                           |             | <b>Data collection and analysis</b>       | 2           | 1  |
| Follow up complete                     | 2  |                                           |             | <b>Reflexivity</b>                        | 1           | 2  |
| Follow up long enough                  | 2  |                                           |             | <b>Total</b>                              | 12          | 12 |
| Results                                | 2  | 0 = not or inadequately addressed/applied | Item score  | 0 = not or inadequately addressed/applied | Item score  |    |
| Precision of the results               | 2  | 1 = adequately addressed/applied          |             | 1 = adequately addressed/applied          |             |    |
| Believe the results                    | 2  | 2 = well addressed/applied                |             | 2 = well addressed/applied                |             |    |
| Results applied                        | 1  | 0–9 = low quality                         | Total score | 0–4 = low quality                         | Total score |    |
| Results fit                            | 1  | 10–17 = moderate quality                  |             | 5–9 = moderate quality                    |             |    |
| Implications for practice              | 1  | 18–24 = high quality                      |             | 10–14 = high quality                      |             |    |
| Total                                  | 23 |                                           |             |                                           |             |    |

### ***Risk of bias***

To minimize bias, two reviewers assessed the risk of bias using the following criteria from the Cochrane Handbook of Systematic Reviews of Interventions version 6.2 (10): methods for allocation, methods for randomization, blinding, and evaluation of internal validity. The reviewers were blinded during the selection of studies to be included and excluded as well as during the quality appraisal. Disagreements were resolved by consensus after the reviewers' judgment.

### **DISCUSSION**

These studies reveal that there are several strategies that can improve the quality of care provided to inpatients, thus improving their perception of respect and dignity. One attitude

1 must guide professional conduct in the health area: the Hippocratic principle "First, do no  
2 harm". This must be considered in all spheres of the provider-patient relationship. Therefore,  
3 although we did not find studies with statistically calculated interventions and effect size  
4 measurements, the quality of the studies included in this systematic review allows us to point  
5 out some strategies that can help improve patients' perceptions regarding respect for and  
6 maintenance of their dignity. Patients and health professionals around the world express the  
7 same interests and desires to have the quality of care raised to the level of excellence and the  
8 rights of patients respected.

9 While we tend to imagine that all patients who have a religion would like to receive visits from  
10 clergymen, even if this is true, one of the studies (15) shows that they would not want their  
11 names to be posted on visiting lists and that they consider this an invasion of your privacy.  
12 Wanting religious support does not mean wanting to be exposed. Violations of rights are also  
13 prevalent in psychiatry. Psychiatric patients demand respect even during their crisis moments,  
14 when there is psychomotor agitation. They demand more attention, and understanding at the  
15 moment of crisis<sup>(16)</sup> before thinking about isolation, considering that seclusion is a form of  
16 violation of their rights and that it often represents the unnecessary use of force to punish them.  
17 The place of care cannot become a place where rights are violated, transforming the treatment  
18 experience into a painful psychic experience (17). Likewise, the communication skills of health  
19 professionals are necessary in other fields (18), such as in pediatrics, in which parents and  
20 children demand more attention and information from physicians as a way of respecting and  
21 showing themselves capable of conducting the treatment, even in moments of the most difficult  
22 decisions. It is necessary for professionals to communicate well with patients and family  
23 members so that they can make the best decisions for the patient's quality of life. Patient care  
24 and information are also important in the emergency room (19). Patients considered to be at  
25 low risk tend to feel abandoned and "left out" when they do not receive the information they  
26 deem necessary. They do not understand why other patients receive care before them, why they  
27 have to wait for several hours, and why their illnesses are considered a low priority. Emergency  
28 room professionals need to be on the lookout for high-risk patients, but they also cannot leave  
29 low priority unattended. In addition, patients of different ethnicities, races and social groups  
30 perceive attention and respect differently (20). Professionals must be aware of these subtleties  
31 of human behavior and spend more time assisting these patients in a way that makes them feel  
32 more respected and welcomed. These small actions can make a difference when a patient seeks  
33 treatment or professional help.

34 One of the fields with the most studies on disrespect/respect and maintenance of dignity is the  
35 relationship between health professionals and women during pregnancy, childbirth and  
36 postpartum (21-37). Most of these studies are focused on women's rights RMC; to have a  
37 companion during childbirth, whether a family member or friend; the right not to be verbally  
38 or physically abused; the right not to have their bodies exposed in a hospital environment,  
39 where there is a large circulation of professionals; the right not to have their bodies invaded by  
40 several individuals, as in the case of teaching hospitals where a group of students or resident  
41 physicians perform a vaginal exam on the same patient; the right to receive information about  
42 prenatal care, pregnancy, childbirth, postpartum, breastfeeding, contraception and infectious-  
43 contagious diseases that can affect the mother and baby; the right of not being discriminated  
44 against because of their weight, color, race or socioeconomic status; the right to have quality  
45 and humanized care in any device in the care network, whether public or private; the right to  
46 receive analgesia or anesthesia, not having, for example, to bear the pain of an episiotomy  
47 without anesthesia; and the right to have less prolonged care, whether public or private.  
48 Obstetric violence is present in several fields of action, among the various health professionals  
49 who work in this area, from harshly speaking to or yelling at, to physically or sexually  
50 assaulting a woman. Considering the most diverse studies on the subject, it is clear that this  
51 practice is widespread in several countries around the world, and there needs to be a large  
52 investment in education and training of health professionals so that women of childbearing age  
53 can be assisted with dignity and respect.

1  
2 Although nurses and patients share the same point of view regarding the recognition of what  
3 are considered inappropriate and disrespectful behaviors in multicultural contexts, the  
4 educational, cultural, social and economic foundations of patients make a difference in this  
5 perception. Health professionals must be aware of this when they care for patients from other  
6 ethnicities and from different socioeconomic levels, as this can lead to negative perceptions  
7 regarding care and complaints, for example, related to discrimination and quality of care (40 -  
8 43). Such conflicts can be mitigated by a more conciliatory professional posture that is more  
9 active in the sense of avoiding conflicts and improving the patients' experience during the  
10 hospitalization period. The investment in training and education of health professionals is the  
11 best solution to improve the quality of care, bringing patients to a more active position in their  
12 treatment, promoting information and autonomy, providing assistance in a timely manner,  
13 respecting rights, maintaining vigilance in cases of disrespect and violations of dignity,  
14 encouraging the acceptance of differences, reducing all types of prejudice and stigma, and  
15 allowing professionals and patients to act together and not in an antagonistic way (44-47).

16 Small attitudes of health professionals can turn into big problems: touching personal  
17 belongings without authorization, moving objects, exposing the patient and making  
18 inappropriate comments, even though it may seem like just an innocent joke. One of the  
19 solutions may be to ask patients and family members to carry out assessments about the service,  
20 analyze complaints in the ombudsman's office, and use these data as important tools to improve  
21 the quality of the service provided. Patient concern regarding the confidentiality of their  
22 medical information is another point that deserves attention. The right to privacy and  
23 confidentiality is directly related to the respect and dignity of patients. Violations of  
24 confidentiality, in addition to being unethical, can cause moral and financial damage to patients  
25 and their families, leading to legal actions against professionals and hospitals. Another way to  
26 give patients more freedom and autonomy is to guarantee them access to their medical  
27 information, either through direct access to the system or through applications. Thus, managers  
28 and government officials must invest in information security systems, since the world is  
29 increasingly digital and the trend is to reduce the use of printed documents, ensuring the  
30 protection of data for patients and professionals. Patients must receive information about  
31 current legislation in terms of information security, their rights to privacy and confidentiality,  
32 and nursing has a fundamental role in the dissemination of ethical principles in the work  
33 environment (48-60).

34 The results found in the articles included in this systematic review show that there is still a long  
35 way to go in promoting more dignified and respectful care for patients admitted to health care  
36 units around the world. The innovation is in the synthesis and enumeration of these practices,  
37 which can bring a new way of dealing with information and profoundly change the way we  
38 serve and think about the care provided to hospitalized patients. Regardless of culture and  
39 nationality, studies show that there is a need to improve the quality of care, whether through  
40 improvements in education during graduation, in student training, in the use of reality data to  
41 refine professional practice, or through training of professionals when entering the labor  
42 market, offering refresher courses, recycling professionals and promoting the availability of  
43 safe means by which professionals can discuss cases and share knowledge without breaching  
44 professional secrecy.

## 51 52 **STRENGTHS OF THIS STUDY**

53 Our study covers a wide range of topics related to the respect and dignity of inpatients, reaching  
54 many countries around the world on virtually every continent. In addition, this systematic  
55 review fills a knowledge gap in an area that has not yet been studied, which, although gaining  
56 prominence in recent years, lacks more research and development. The fact that there is no  
57 limitation on the time researched and on the language allowed us to reach from the most recent  
58 to the oldest studies on this topic.

## 59 60 **LIMITATIONS**

1  
2 Although we have tried to reach as many studies as possible, its results cannot be generalized  
3 to all cultures and countries of the world, and it does not include all specialties and their  
4 peculiarities. One study could not be retrieved, and it might have data that could be important  
5 to the results of this study. The data were not homogeneous enough to perform a meta-analysis,  
6 which would enrich the results. More studies with controlled interventions and outcomes  
7 should be carried out to measure the effect on the perception of respect for and maintenance of  
8 the dignity of hospitalized patients.  
9

## 10 **STATEMENT OF FINDINGS**

11 Regarding clinical practice, our study brings several collaborations based on the findings of the  
12 reviewed articles. Actions to promote dignity include: providing information correctly and  
13 clearly about procedures and treatments, serving with politeness and kindness, avoiding  
14 gestures and comments that might be perceived as disrespectful, putting aside prejudices (you  
15 are not there to judge but to serve to the best of your ability and professional ethics), taking as  
16 much time to serve as necessary, adhering to confidentiality when sharing information with  
17 team members, listening to complaints and trying to resolve them, responding to timely calls,  
18 using patient complaints made as a way to improve the hospital routine, promoting  
19 improvements in the quality of the environment (including cleaning, lighting and noise  
20 control), allowing pregnant women to have companions, avoiding yelling at patients or using  
21 physical touch as a form of reprimand (which can be understood as physical aggression),  
22 avoiding unnecessary exposure of the patient's body, avoiding intimate examination by various  
23 professionals (especially in teaching hospitals), obtaining consent for diagnostic and  
24 therapeutic procedures, informing patients about the drugs that will be applied (name and what  
25 they are used for), introducing oneself to the patient, asking if the patient wants to receive visits  
26 and from whom, asking who the patient would like to share information with, calling the patient  
27 by his or her name (avoiding colloquial or derogatory language), demonstrating knowledge,  
28 showing security and professional skills, and using setbacks as opportunities for your own and  
29 for your team's collective learning.  
30  
31  
32  
33  
34

## 35 **IMPLICATIONS FOR PRACTICE**

36 Our findings provide perspectives that could and should be used to improve patient care and  
37 education in different areas of health around the world.  
38

## 39 **IMPLICATIONS FOR RESEARCH**

40 Virtually all studies related to the quality of care, respect, dignity, confidentiality and privacy  
41 of hospitalized patients, have a qualitative or cross-sectional design. It is necessary that future  
42 research be designed with controlled interventions and effect size measurement to bring more  
43 robustness to the findings, since this subject is gaining prominence in daily practice.  
44 Furthermore, regardless of the country, respect and dignity are universal and fundamental  
45 rights of every human being and must, therefore, be put into practice wherever patients are.  
46  
47  
48

## 49 **CONCLUSION**

50 Our systematic review touches on important points of care during professional practice, with  
51 the aim of delivering truly patient-centered care to patients.  
52 Professional practice is regulated by legal means and by professional education, but it is  
53 observed that there is a lack of training so that various everyday conflicts can be mitigated and  
54 resolved locally without harming the patient. It is inconceivable that patients need to look for  
55 another health facility because they feel mistreated at a place that should provide care.  
56 Likewise, it is unacceptable for a health professional not to be able to handle situations in their  
57 professional routine without resorting to violence or verbal aggression. When a patient goes to  
58 a health unit, he or she seeks care; therefore, we have the obligation to provide care, without  
59 prejudice, without discrimination and to the best of our technical capacity, with respect and  
60 dignity. This is the wish of all patients around the world.



## REGISTRATION AND PROTOCOL

This study protocol was registered at PROSPERO (CRD42021241805 - Improving the perception of respect for and the dignity of the inpatient: A Review), and it was conducted in accordance with PRISMA 2020 guidelines (9).

## FUNDING

This study has no external funding source.

## CONFLICTS OF INTEREST

The authors declare that they have no competing interests.

## CORRESPONDING AUTHOR:

Pablo Eduardo Pereira Dutra, MD  
ORCID: <https://orcid.org/0000-0003-3970-5668>  
Laboratory of Panic and Respiration (LABPR)  
Institute of Psychiatry of UFRJ (IPUB)  
Federal University of Rio de Janeiro (UFRJ)  
Av. Venceslau Brás, 71, Botafogo, Rio de Janeiro/RJ  
Phone: +55 21 3938-0500  
E-mail: [pablo.medicina@ufrj.br](mailto:pablo.medicina@ufrj.br)

## AUTHORS AND AFFILIATIONS

Pablo Eduardo Pereira Dutra, MD  
ORCID: <https://orcid.org/0000-0003-3970-5668>  
Laboratory of Panic and Respiration (LABPR)  
Institute of Psychiatry of the UFRJ (IPUB)  
Federal University of Rio de Janeiro (UFRJ)  
Av. Venceslau Brás, 71, Botafogo, Rio de Janeiro/RJ  
Phone: +55 21 3938-0500  
E-mail: [pablo.medicina@ufrj.br](mailto:pablo.medicina@ufrj.br)

Laiana Azevedo Quagliato, MD, MSc  
ORCID: <https://orcid.org/0000-0002-6928-5847>  
Laboratory of Panic and Respiration (LABPR)  
Institute of Psychiatry of the UFRJ (IPUB)  
Federal University of Rio de Janeiro (UFRJ)  
Av. Venceslau Brás, 71, Botafogo, Rio de Janeiro/RJ  
Phone: +55 21 3938-0500

Antonio Egidio Nardi, MD, PhD  
ORCID: <https://orcid.org/0000-0002-2152-4669>  
Laboratory of Panic and Respiration (LABPR)  
Institute of Psychiatry of the UFRJ (IPUB)  
Federal University of Rio de Janeiro (UFRJ)  
Av. Venceslau Brás, 71, Botafogo, Rio de Janeiro/RJ  
Phone: +55 21 3938-0500

## ORCID

Pablo Eduardo Pereira Dutra - <https://orcid.org/0000-0003-3970-5668>

1  
2 Laiana Azevedo Quagliato - <https://orcid.org/0000-0002-6928-5847>  
3 Antonio Egidio Nardi - <https://orcid.org/0000-0002-2152-4669>  
4  
5  
6

## 7 REFERENCES

8  
9  
10  
11  
12

- 13 1) United Nations. Universal Declaration of Human Rights | united nations. [cited 2021  
14 June 8]; Available from: [https://www.un.org/en/about-us/universal-declaration-of-human-](https://www.un.org/en/about-us/universal-declaration-of-human-rights)  
15 [rights](https://www.un.org/en/about-us/universal-declaration-of-human-rights)  
16  
17
- 18 2) Ferri P, Muzzalupo J, Di Lorenzo R. Patients' perception of dignity in an Italian general  
19 hospital: a cross-sectional analysis. *BMC Health Serv Res.* 2015;15(1):41-48.  
20
- 21 3) Conselho Federal de Medicina. Código de Ética Médica [Internet]. Conselho Federal  
22 de Medicina. 2019 [cited 2021 June 8]. Available from:  
23 <https://portal.cfm.org.br/images/PDF/cem2019.pdf>  
24  
25
- 26 4) World Health Organization (WHO). A Declaration on the Promotion of Patients Rights  
27 in Europe. [Internet] 1994. [cited 2021 June 08]. Available from:  
28 [https://www.who.int/genomics/public/eu\\_declaration1994.pdf](https://www.who.int/genomics/public/eu_declaration1994.pdf)  
29  
30
- 31 5) Bagheri A. Elements of human dignity in healthcare settings: the importance of the  
32 patient's perspective. *J Med Ethics.* 2012;38(12):729–30.  
33  
34
- 35 6) Campillo B, Corbella J, Gelpi M, Martinez E, Viciano MA, Alonso M. Development  
36 and validation of the scale of perception of respect for and maintenance of the dignity of the  
37 inpatient [CuPDPH]. *Ethics Med Public Health.* 2020;15(100553):100553.  
38  
39
- 40 7) Phelan SM, Burgess DJ, Yeazel MW, Hellerstedt WL, Griffin JM, van Ryn M. Impact  
41 of weight bias and stigma on quality of care and outcomes for patients with obesity: Obesity  
42 stigma and patient care. *Obes Rev.* 2015;16(4):319–26.  
43  
44
- 45 8) Mirzoev T, Kane S. Key strategies to improve systems for managing patient complaints  
46 within health facilities - what can we learn from the existing literature? *Glob Health Action.*  
47 2018;11(1):1458938.  
48  
49
- 50 9) Page MJ, McKenzie JE, Bossuyt PM, Boutron I, Hoffmann TC, Mulrow CD, et al. The  
51 PRISMA 2020 statement: an updated guideline for reporting systematic reviews. *Syst Rev.*  
52 2021;10(1):89.  
53  
54
- 55 10) Chapter 7: Considering bias and conflicts of interest among the included studies  
56 [Internet]. *Cochrane.org.* [cited 2021 June 8]. Available from:  
57 <https://training.cochrane.org/handbook/current/chapter-07>  
58  
59  
60

- 11) Critical Appraisal Skills Programme. CASP Qualitative Studies Checklist [Internet]. B-cdn.net. [cited 2021 Jul 6]. Available from: [https://casp-uk.b-cdn.net/wp-content/uploads/2018/03/CASP-Qualitative-Checklist-2018\\_fillable\\_form.pdf](https://casp-uk.b-cdn.net/wp-content/uploads/2018/03/CASP-Qualitative-Checklist-2018_fillable_form.pdf)
- 12) Specialist Unit for Review Evidence (SURE). Questions to assist with the critical appraisal of cross-sectional studies [Internet]. Cardiff.ac.uk. 2015 [cited 2021 Jul 9]. Available from: [https://www.cardiff.ac.uk/\\_\\_data/assets/pdf\\_file/0006/212775/SURE\\_Qualitative\\_checklist\\_2015.pdf](https://www.cardiff.ac.uk/__data/assets/pdf_file/0006/212775/SURE_Qualitative_checklist_2015.pdf)
- 13) Critical Appraisal Skills Programme. CASP Cohort Study Checklist [Internet]. B-cdn.net. [cited 2021 Jul 26]. Available from: [https://casp-uk.b-cdn.net/wp-content/uploads/2018/03/CASP-Cohort-Study-Checklist-2018\\_fillable\\_form.pdf](https://casp-uk.b-cdn.net/wp-content/uploads/2018/03/CASP-Cohort-Study-Checklist-2018_fillable_form.pdf)
- 14) Mays N, Pope C. Qualitative research in health care. Assessing quality in qualitative research. *BMJ*. 2000;320(7226):50–2.
- 15) Erde E, Pomerantz SC, Saccocci M, Kramer-Feeley V, Cavalieri TA. Privacy and patient-clergy access: perspectives of patients admitted to hospital. *J Med Ethics*. 2006;32(7):398–402.
- 16) Faschingbauer KM, Peden-McAlpine C, Tempel W. Use of seclusion: finding the voice of the patient to influence practice. *J Psychosoc Nurs Ment Health Serv*. 2013;51(7):32–8.
- 17) Robins CS, Sauvageot JA, Cusack KJ, Suffoletta-Maierle S, Frueh BC. Consumers' perceptions of negative experiences and “sanctuary harm” in psychiatric settings. *Psychiatr Serv*. 2005;56(9):1134–8.
- 18) Hsiao JL, Evan EE, Zeltzer LK. Parent and child perspectives on physician communication in pediatric palliative care. *Palliat Support Care*. 2007;5(4):355–65.
- 19) Adolfsson A, Dahlén, Westin. Experience of being a low priority patient during waiting time at an emergency department. *Psychol Res Behav Manag*. 2012;5:1-9.
- 20) Beach MC, Branyon E, Saha S. Diverse patient perspectives on respect in healthcare: A qualitative study. *Patient Educ Couns*. 2017;100(11):2076–80.
- 21) Burrowes S, Holcombe SJ, Jara D, Carter D, Smith K. Midwives' and patients' perspectives on disrespect and abuse during labor and delivery care in Ethiopia: a qualitative study. *BMC Pregnancy Childbirth*. 2017;17(1):263-74.
- 22) Dynes MM, Twentyman E, Kelly L, Maro G, Msuya AA, Dominico S, et al. Patient and provider determinants for receipt of three dimensions of respectful maternity care in Kigoma Region, Tanzania-April-July, 2016. *Reprod Health* [Internet]. 2018;15(1):41-64.

- 1  
2 23) Gebremichael MW, Worku A, Medhanyie AA, Berhane Y. Mothers' experience of  
3 disrespect and abuse during maternity care in northern Ethiopia. *Glob Health Action*.  
4 2018;11(sup3):1465215.  
5  
6 24) Gebremichael MW, Worku A, Medhanyie AA, Edin K, Berhane Y. Women suffer more  
7 from disrespectful and abusive care than from the labour pain itself: a qualitative study from  
8 Women's perspective. *BMC Pregnancy Childbirth*. 2018;18(1):392-97.  
9  
10 25) Horwood C, Haskins L, Luthuli S, McKerrow N. Communication between mothers and  
11 health workers is important for quality of newborn care: a qualitative study in neonatal units in  
12 district hospitals in South Africa. *BMC Pediatr*. 2019;19(1):496-508.  
13  
14 26) Hussein SAAA, Dahlen HG, Ogunsiyi O, Schmied V. Uncovered and disrespected. A  
15 qualitative study of Jordanian women's experience of privacy in birth. *Women Birth*.  
16 2020;33(5):496-504.  
17  
18 27) Incollingo Rodriguez AC, Smieszek SM, Nippert KE, Tomiyama AJ. Pregnant and  
19 postpartum women's experiences of weight stigma in healthcare. *BMC Pregnancy Childbirth*.  
20 2020;20(1):499-508.  
21  
22 28) Jolly Y, Aminu M, Mgawadere F, van den Broek N. "We are the ones who should make  
23 the decision" - knowledge and understanding of the rights-based approach to maternity care  
24 among women and healthcare providers. *BMC Pregnancy Childbirth*. 2019;19(1):42-9.  
25  
26 29) Kanengoni B, Andajani-Sutjahjo S, Holroyd E. Women's experiences of disrespectful  
27 and abusive maternal health care in a low resource rural setting in eastern Zimbabwe.  
28 *Midwifery*. 2019;76:125-31.  
29  
30 30) Khresheh R, Barclay L, Shoqirat N. Caring behaviours by midwives: Jordanian  
31 women's perceptions during childbirth. *Midwifery*. 2019;74:1-5.  
32  
33 31) Kujawski S, Mbaruku G, Freedman LP, Ramsey K, Moyo W, Kruk ME. Association  
34 between disrespect and abuse during childbirth and women's confidence in health facilities in  
35 Tanzania. *Matern Child Health J*. 2015;19(10):2243-50.  
36  
37 32) McMahon SA, George AS, Chebet JJ, Mosha IH, Mpembeni RNM, Winch PJ.  
38 Experiences of and responses to disrespectful maternity care and abuse during childbirth; a  
39 qualitative study with women and men in Morogoro Region, Tanzania. *BMC Pregnancy  
40 Childbirth*. 2014;14:268-80.  
41  
42 33) Millicent Dzomeku V, van Wyk B, Lori JR. Experiences of women receiving childbirth  
43 care from public health facilities in Kumasi, Ghana. *Midwifery*. 2017;55:90-5.  
44  
45 34) Rodríguez-Almagro J, Hernández-Martínez A, Rodríguez-Almagro D, Quirós-García  
46 JM, Martínez-Galiano JM, Gómez-Salgado J. Women's perceptions of living a traumatic  
47  
48  
49  
50  
51  
52  
53  
54  
55  
56  
57  
58  
59  
60

1  
2 childbirth experience and factors related to a birth experience. *Int J Environ Res Public Health*.  
3 2019;16(9):1654-66.  
4

5 35) Thommesen T, Kismul H, Kaplan I, Safi K, Van den Bergh G. “The midwife helped  
6 me ... otherwise I could have died”: women’s experience of professional midwifery services in  
7 rural Afghanistan - a qualitative study in the provinces Kunar and Laghman. *BMC Pregnancy*  
8 *Childbirth*. 2020;20(1):140-56.  
9

10 36) Vedam S, Stoll K, Taiwo TK, Rubashkin N, Cheyney M, Strauss N, et al. The Giving  
11 Voice to Mothers study: inequity and mistreatment during pregnancy and childbirth in the  
12 United States. *Reprod Health*. 2019;16(1):77-94.  
13

14 37) Montesinos-Segura R, Urrunaga-Pastor D, Mendoza-Chuctaya G, Taype-Rondan A,  
15 Helguero-Santin LM, Martinez-Ninanqui FW, et al. Disrespect and abuse during childbirth in  
16 fourteen hospitals in nine cities of Peru. *Int J Gynaecol Obstet*. 2018;140(2):184–90.  
17

18 38) The White Ribbon Alliance. Respectful Maternity Care: The Universal Rights of  
19 Childbearing Women [Internet]. *Healthpolicyproject.com*. [cited 2021 Aug 22]. Available  
20 from: [http://www.healthpolicyproject.com/pubs/46\\_FinalRespectfulCareCharter.pdf](http://www.healthpolicyproject.com/pubs/46_FinalRespectfulCareCharter.pdf)  
21

22 39) WHO Statement. The prevention and elimination of disrespect and abuse during  
23 facility-based childbirth [Internet]. *Who.int*. [cited 2021 Aug 22]. Available from:  
24 [https://apps.who.int/iris/bitstream/handle/10665/134588/WHO\\_RHR\\_14.23\\_eng.pdf](https://apps.who.int/iris/bitstream/handle/10665/134588/WHO_RHR_14.23_eng.pdf)  
25

26 40) Asmaningrum N, Kurniawati D, Tsai Y-F. Threats to patient dignity in clinical care  
27 settings: A qualitative comparison of Indonesian nurses and patients. *J Clin Nurs*. 2020;29(5–  
28 6):899–908.  
29

30 41) Blanchard J, Lurie N. R-E-S-P-E-C-T: patient reports of disrespect in the health care  
31 setting and its impact on care. *J Fam Pract*. 2004;53(9):721–30.  
32

33 42) Ebrahimi H, Torabizadeh C, Mohammadi E, Valizadeh S. Patients’ perception of  
34 dignity in Iranian healthcare settings: a qualitative content analysis. *J Med Ethics*.  
35 2012;38(12):723–8.  
36

37 43) King JD, van Dijk PAD, Overbeek CL, Hageman MGJS, Ring D. Patient complaints  
38 emphasize non-technical aspects of care at a tertiary referral hospital. *Arch Bone Jt Surg*.  
39 2017;5(2):74–81.  
40

41 44) Howard M, Fleming ML, Parker E. Patients do not always complain when they are  
42 dissatisfied: implications for service quality and patient safety. *J Patient Saf*. 2013;9(4):224–  
43 31.  
44

45 45) Hrisos S, Thomson R. Seeing it from both sides: do approaches to involving patients in  
46 improving their safety risk damaging the trust between patients and healthcare professionals?  
47 An interview study. *PLoS One*. 2013;8(11):e80759.  
48  
49  
50  
51  
52  
53  
54  
55  
56  
57  
58  
59  
60

- 1  
2 46) Khademi M, Mohammadi E, Vanaki Z. On the violation of hospitalized patients' rights:  
3 A qualitative study. *Nurs Ethics*. 2019;26(2):576–86.  
4  
5 47) Fleury S, Bicudo V, Rangel G. Reacciones a la violencia institucional: estrategias de  
6 los pacientes frente al contraderecho a la salud en Brasil. *Salud Colect*. 2013;9(1):11–25.  
7  
8 48) Kuo K-M, Ma C-C, Alexander JW. How do patients respond to violation of their  
9 information privacy? *Health Inf Manag*. 2014;43(2):23–33.  
10  
11 49) Lee AV, Moriarty JP, Borgstrom C, Horwitz LI. What can we learn from patient  
12 dissatisfaction? An analysis of dissatisfying events at an academic medical center. *J Hosp Med*.  
13 2010;5(9):514–20.  
14  
15 50) Marin CR, Gasparino RC, Puggina AC. The perception of territory and personal space  
16 invasion among hospitalized patients. *PLoS One*. 2018;13(6):e0198989.  
17  
18 51) Mohammadi M, Larijani B, Emami Razavi SH, Fotouhi A, Ghaderi A, Madani SJ, et  
19 al. Do patients know that physicians should be confidential? study on patients' awareness of  
20 privacy and confidentiality. *J Med Ethics Hist Med*. 2018;11:1-7.  
21  
22 52) Merakou K, Dalla-Vorgia P, Garanis-Papadatos T, Kourea-Kremastinou J. Satisfying  
23 Patients' Rights: a hospital patient survey. *Nurs Ethics*. 2001;8(6):499–509.  
24  
25 53) Ming Y, Wei H, Cheng H, Ming J, Beck M. Analyzing patients' complaints:  
26 Awakening of the ethic of belonging: Awakening of the ethic of belonging. *ANS Adv Nurs*  
27 *Sci*. 2019;42(4):278–88.  
28  
29 54) Öztürk H, Torun Kılıç Ç, Kahrıman İ, Meral B, Çolak B. Assessment of nurses' respect  
30 for patient privacy by patients and nurses: A comparative study. *J Clin Nurs*. 2021;30(7–  
31 8):1079–90.  
32  
33 55) Pupulim JSL, Sawada NO. Percepção de pacientes sobre a privacidade no hospital. *Rev*  
34 *Bras Enferm*. 2012;65(4):621–9.  
35  
36 56) Sanson G, Lobefalo A, Fasci A. “Love can't be taken to the hospital. If it were possible,  
37 it would be better”: Patients' experiences of being cared for in an intensive care unit. *Qual*  
38 *Health Res*. 2021;31(4):736–53.  
39  
40 57) Santos LR, Beneri RL, Lunardi VL. Ethical questions in the work of the health team:  
41 the (dis)respect to client's rights. *Rev Gaucha Enferm*. 2005;26(3):403–13.  
42  
43 58) Skyman E, Bergbom I, Lindahl B, Larsson L, Lindqvist A, Thunberg Sjöström H, et al.  
44 Notification card to alert for methicillin-resistant *Staphylococcus aureus* is stigmatizing from  
45 the patient's point of view. *Scand J Infect Dis*. 2014;46(6):440–6.  
46  
47 59) Widäng I, Fridlund B. Self-respect, dignity and confidence: conceptions of integrity  
48 among male patients: Conceptions of integrity among male patients. *J Adv Nurs*.  
49 2003;42(1):47–56.  
50  
51  
52  
53  
54  
55  
56  
57  
58  
59  
60

- 1  
2 60) Wofford MM, Wofford JL, Bothra J, Kendrick SB, Smith A, Lichstein PR. Patient  
3 complaints about physician behaviors: a qualitative study. *Acad Med.* 2004;79(2):134–8.  
4  
5 61) Kayaalp M. Patient privacy in the era of big data. *Balkan Med J.* 2018;35(1):8–17.  
6  
7 62) Rodríguez-Prat A, Monforte-Royo C, Porta-Sales J, Escribano X, Balaguer A. Patient  
8 perspectives of dignity, autonomy and control at the end of life: Systematic review and meta-  
9 ethnography. *PLoS One.* 2016;11(3):e0151435.  
10  
11 63) Kallergis G. The contribution of the relationship between therapist-patient and the  
12 context of the professional relationship. *Psychiatrike.* 2019;30(2):165–74.  
13  
14  
15  
16  
17  
18

### 19 **COPYRIGHT/LICENSE FOR PUBLICATION**

20  
21 “The Corresponding Author has the right to grant on behalf of all authors and does grant on  
22 behalf of all authors, a worldwide licence to the Publishers and its licensees in perpetuity, in  
23 all forms, formats and media (whether known now or created in the future), to i) publish,  
24 reproduce, distribute, display and store the Contribution, ii) translate the Contribution into  
25 other languages, create adaptations, reprints, include within collections and create summaries,  
26 extracts and/or, abstracts of the Contribution, iii) create any other derivative work(s) based on  
27 the Contribution, iv) to exploit all subsidiary rights in the Contribution, v) the inclusion of  
28 electronic links from the Contribution to third party material where-ever it may be located;  
29 and, vi) licence any third party to do any or all of the above.”  
30  
31  
32  
33

### 34 **Figure caption:**

### 35 **Figure 1: PRISMA flow diagram**

36  
37  
38  
39  
40  
41  
42  
43  
44  
45  
46  
47  
48  
49  
50  
51  
52  
53  
54  
55  
56  
57  
58  
59  
60

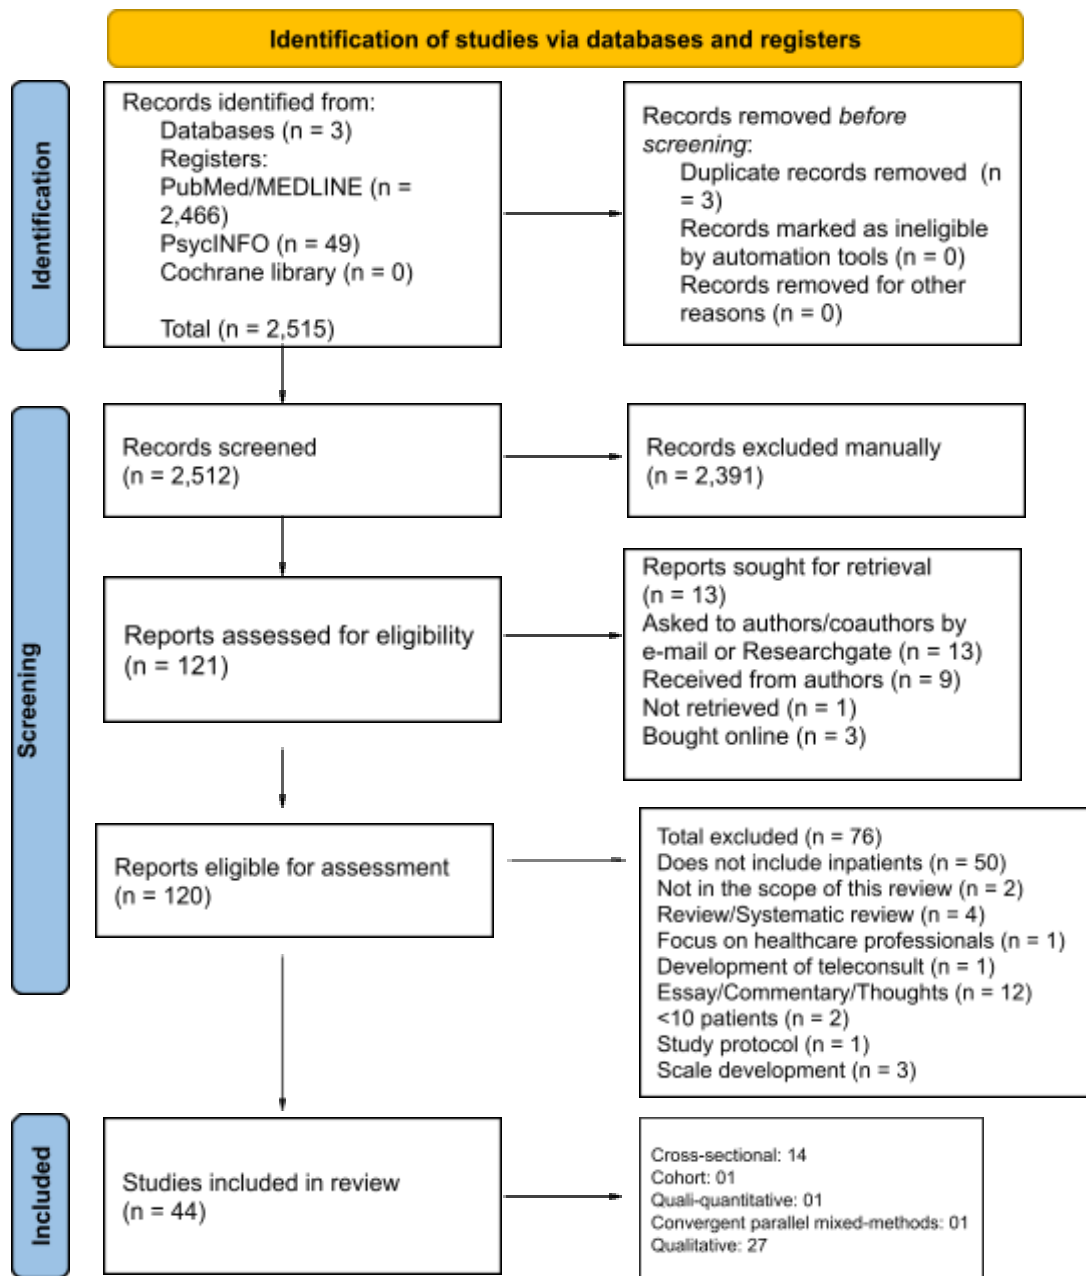

Figure 1: PRISMA flow diagram



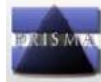

## PRISMA 2020 for Abstracts Checklist

| Section and Topic       | Item # | Checklist item                                                                                                                                                                                                                                                                                        | Reported (Yes/No) |
|-------------------------|--------|-------------------------------------------------------------------------------------------------------------------------------------------------------------------------------------------------------------------------------------------------------------------------------------------------------|-------------------|
| <b>TITLE</b>            |        |                                                                                                                                                                                                                                                                                                       |                   |
| Title                   | 1      | Identify the report as a systematic review.                                                                                                                                                                                                                                                           | Page 2 - Yes      |
| <b>BACKGROUND</b>       |        |                                                                                                                                                                                                                                                                                                       |                   |
| Objectives              | 2      | Provide an explicit statement of the main objective(s) or question(s) the review addresses.                                                                                                                                                                                                           | Page 2 - Yes      |
| <b>METHODS</b>          |        |                                                                                                                                                                                                                                                                                                       |                   |
| Eligibility criteria    | 3      | Specify the inclusion and exclusion criteria for the review.                                                                                                                                                                                                                                          | Page 2 - Yes      |
| Information sources     | 4      | Specify the information sources (e.g. databases, registers) used to identify studies and the date when each was last searched.                                                                                                                                                                        | Page 2 - Yes      |
| Risk of bias            | 5      | Specify the methods used to assess risk of bias in the included studies.                                                                                                                                                                                                                              | Page 2 - Yes      |
| Synthesis of results    | 6      | Specify the methods used to present and synthesise results.                                                                                                                                                                                                                                           | Page 2 - Yes      |
| <b>RESULTS</b>          |        |                                                                                                                                                                                                                                                                                                       |                   |
| Included studies        | 7      | Give the total number of included studies and participants and summarise relevant characteristics of studies.                                                                                                                                                                                         | Page 2 - Yes      |
| Synthesis of results    | 8      | Present results for main outcomes, preferably indicating the number of included studies and participants for each. If meta-analysis was done, report the summary estimate and confidence/credible interval. If comparing groups, indicate the direction of the effect (i.e. which group is favoured). | Page 2 - Yes      |
| <b>DISCUSSION</b>       |        |                                                                                                                                                                                                                                                                                                       |                   |
| Limitations of evidence | 9      | Provide a brief summary of the limitations of the evidence included in the review (e.g. study risk of bias, inconsistency and imprecision).                                                                                                                                                           | Page 2 - Yes      |
| Interpretation          | 10     | Provide a general interpretation of the results and important implications.                                                                                                                                                                                                                           | Page 2 - Yes      |
| <b>OTHER</b>            |        |                                                                                                                                                                                                                                                                                                       |                   |
| Funding                 | 11     | Specify the primary source of funding for the review.                                                                                                                                                                                                                                                 | Page 2 - Yes      |
| Registration            | 12     | Provide the register name and registration number.                                                                                                                                                                                                                                                    | Page 2 - Yes      |

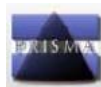

## PRISMA 2020 for Abstracts Checklist

1  
2  
3  
4 *From:* Page MJ, McKenzie JE, Bossuyt PM, Boutron I, Hoffmann TC, Mulrow CD, et al. The PRISMA 2020 statement: an updated guideline for reporting systematic  
5 reviews. *BMJ* 2021;372:n71. doi: 10.1136/bmj.n71  
6

7  
8 For more information, visit: <http://www.prisma-statement.org/>  
9

10  
11  
12  
13  
14  
15  
16  
17  
18  
19  
20  
21  
22  
23  
24  
25  
26  
27  
28  
29  
30  
31  
32  
33  
34  
35  
36  
37  
38  
39  
40  
41  
42  
43  
44  
45  
46  
47

For peer review only

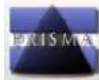

## PRISMA 2020 Checklist

| Section and Topic             | Item # | Checklist item                                                                                                                                                                                                                                                                                       | Location where item is reported |
|-------------------------------|--------|------------------------------------------------------------------------------------------------------------------------------------------------------------------------------------------------------------------------------------------------------------------------------------------------------|---------------------------------|
| <b>TITLE</b>                  |        |                                                                                                                                                                                                                                                                                                      |                                 |
| Title                         | 1      | Identify the report as a systematic review.                                                                                                                                                                                                                                                          | Page 2                          |
| <b>ABSTRACT</b>               |        |                                                                                                                                                                                                                                                                                                      |                                 |
| Abstract                      | 2      | See the PRISMA 2020 for Abstracts checklist.                                                                                                                                                                                                                                                         | Page 2                          |
| <b>INTRODUCTION</b>           |        |                                                                                                                                                                                                                                                                                                      |                                 |
| Rationale                     | 3      | Describe the rationale for the review in the context of existing knowledge.                                                                                                                                                                                                                          | Page 2-3                        |
| Objectives                    | 4      | Provide an explicit statement of the objective(s) or question(s) the review addresses.                                                                                                                                                                                                               | Page 3                          |
| <b>METHODS</b>                |        |                                                                                                                                                                                                                                                                                                      |                                 |
| Eligibility criteria          | 5      | Specify the inclusion and exclusion criteria for the review and how studies were grouped for the syntheses.                                                                                                                                                                                          | Page 3                          |
| Information sources           | 6      | Specify all databases, registers, websites, organisations, reference lists and other sources searched or consulted to identify studies. Specify the date when each source was last searched or consulted.                                                                                            | Page 3                          |
| Search strategy               | 7      | Present the full search strategies for all databases, registers and websites, including any filters and limits used.                                                                                                                                                                                 | Page 3                          |
| Selection process             | 8      | Specify the methods used to decide whether a study met the inclusion criteria of the review, including how many reviewers screened each record and each report retrieved, whether they worked independently, and if applicable, details of automation tools used in the process.                     | Page 3                          |
| Data collection process       | 9      | Specify the methods used to collect data from reports, including how many reviewers collected data from each report, whether they worked independently, any processes for obtaining or confirming data from study investigators, and if applicable, details of automation tools used in the process. | Page 3                          |
| Data items                    | 10a    | List and define all outcomes for which data were sought. Specify whether all results that were compatible with each outcome domain in each study were sought (e.g. for all measures, time points, analyses), and if not, the methods used to decide which results to collect.                        | Page 3                          |
|                               | 10b    | List and define all other variables for which data were sought (e.g. participant and intervention characteristics, funding sources). Describe any assumptions made about any missing or unclear information.                                                                                         | Page 3                          |
| Study risk of bias assessment | 11     | Specify the methods used to assess risk of bias in the included studies, including details of the tool(s) used, how many reviewers assessed each study and whether they worked independently, and if applicable, details of automation tools used in the process.                                    | Pages 3 and 11                  |
| Effect measures               | 12     | Specify for each outcome the effect measure(s) (e.g. risk ratio, mean difference) used in the synthesis or presentation of results.                                                                                                                                                                  | Not applicable                  |
| Synthesis methods             | 13a    | Describe the processes used to decide which studies were eligible for each synthesis (e.g. tabulating the study intervention characteristics and comparing against the planned groups for each synthesis (item #5)).                                                                                 | Page 3                          |
|                               | 13b    | Describe any methods required to prepare the data for presentation or synthesis, such as handling of missing summary statistics, or data conversions.                                                                                                                                                | Page 3                          |
|                               | 13c    | Describe any methods used to tabulate or visually display results of individual studies and syntheses.                                                                                                                                                                                               | Page 3                          |
|                               | 13d    | Describe any methods used to synthesize results and provide a rationale for the choice(s). If meta-analysis was performed, describe the model(s), method(s) to identify the presence and extent of statistical heterogeneity, and software package(s) used.                                          | Pages 3-6, and pages 8-11       |
|                               | 13e    | Describe any methods used to explore possible causes of heterogeneity among study results (e.g. subgroup analysis, meta-regression).                                                                                                                                                                 | Pages 3-4                       |
|                               | 13f    | Describe any sensitivity analyses conducted to assess robustness of the synthesized results.                                                                                                                                                                                                         | Pages 3, 4, 8                   |
| Reporting bias                | 14     | Describe any methods used to assess risk of bias due to missing results in a synthesis (arising from reporting biases).                                                                                                                                                                              | Pages 3, 11                     |

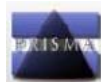

## PRISMA 2020 Checklist

| Section and Topic             | Item # | Checklist item                                                                                                                                                                                                                                                                       | Location where item is reported |
|-------------------------------|--------|--------------------------------------------------------------------------------------------------------------------------------------------------------------------------------------------------------------------------------------------------------------------------------------|---------------------------------|
| assessment                    |        |                                                                                                                                                                                                                                                                                      |                                 |
| Certainty assessment          | 15     | Describe any methods used to assess certainty (or confidence) in the body of evidence for an outcome.                                                                                                                                                                                | Page 8                          |
| <b>RESULTS</b>                |        |                                                                                                                                                                                                                                                                                      |                                 |
| Study selection               | 16a    | Describe the results of the search and selection process, from the number of records identified in the search to the number of studies included in the review, ideally using a flow diagram.                                                                                         | Pages 3,4                       |
|                               | 16b    | Cite studies that might appear to meet the inclusion criteria, but which were excluded, and explain why they were excluded.                                                                                                                                                          | Page 4                          |
| Study characteristics         | 17     | Cite each included study and present its characteristics.                                                                                                                                                                                                                            | Page 4-6                        |
| Risk of bias in studies       | 18     | Present assessments of risk of bias for each included study.                                                                                                                                                                                                                         | Page 11                         |
| Results of individual studies | 19     | For all outcomes, present, for each study: (a) summary statistics for each group (where appropriate) and (b) an effect estimate and its precision (e.g. confidence/credible interval), ideally using structured tables or plots.                                                     | Pages 3-8                       |
| Results of syntheses          | 20a    | For each synthesis, briefly summarise the characteristics and risk of bias among contributing studies.                                                                                                                                                                               | Page 11                         |
|                               | 20b    | Present results of all statistical syntheses conducted. If meta-analysis was done, present for each the summary estimate and its precision (e.g. confidence/credible interval) and measures of statistical heterogeneity. If comparing groups, describe the direction of the effect. | Not applicable                  |
|                               | 20c    | Present results of all investigations of possible causes of heterogeneity among study results.                                                                                                                                                                                       | Page 13                         |
|                               | 20d    | Present results of all sensitivity analyses conducted to assess the robustness of the synthesized results.                                                                                                                                                                           | Pages 8-11                      |
| Reporting biases              | 21     | Present assessments of risk of bias due to missing results (arising from reporting biases) for each synthesis assessed.                                                                                                                                                              | Page 4, 13                      |
| Certainty of evidence         | 22     | Present assessments of certainty (or confidence) in the body of evidence for each outcome assessed.                                                                                                                                                                                  | Pages 8-11                      |
| <b>DISCUSSION</b>             |        |                                                                                                                                                                                                                                                                                      |                                 |
| Discussion                    | 23a    | Provide a general interpretation of the results in the context of other evidence.                                                                                                                                                                                                    | Pages 11-13                     |
|                               | 23b    | Discuss any limitations of the evidence included in the review.                                                                                                                                                                                                                      | Page 13                         |
|                               | 23c    | Discuss any limitations of the review processes used.                                                                                                                                                                                                                                | Page 13                         |
|                               | 23d    | Discuss implications of the results for practice, policy, and future research.                                                                                                                                                                                                       | Pages 13, 14                    |
| <b>OTHER INFORMATION</b>      |        |                                                                                                                                                                                                                                                                                      |                                 |
| Registration and protocol     | 24a    | Provide registration information for the review, including register name and registration number, or state that the review was not registered.                                                                                                                                       | Pages 2, 3, 14                  |
|                               | 24b    | Indicate where the review protocol can be accessed, or state that a protocol was not prepared.                                                                                                                                                                                       | PROSPERO                        |
|                               | 24c    | Describe and explain any amendments to information provided at registration or in the protocol.                                                                                                                                                                                      | None                            |
| Support                       | 25     | Describe sources of financial or non-financial support for the review, and the role of the funders or sponsors in the review.                                                                                                                                                        | Page 14                         |
| Competing interests           | 26     | Declare any competing interests of review authors.                                                                                                                                                                                                                                   | Page 14                         |

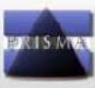

# PRISMA 2020 Checklist

1  
2  
3  
4  
5  
6  
7  
8  
9  
10  
11  
12  
13  
14  
15  
16  
17  
18  
19  
20  
21  
22  
23  
24  
25  
26  
27  
28  
29  
30  
31  
32  
33  
34  
35  
36  
37  
38  
39  
40  
41  
42  
43  
44  
45  
46  
47

| Section and Topic                              | Item # | Checklist item                                                                                                                                                                                                                             | Location where item is reported |
|------------------------------------------------|--------|--------------------------------------------------------------------------------------------------------------------------------------------------------------------------------------------------------------------------------------------|---------------------------------|
| Availability of data, code and other materials | 27     | Report which of the following are publicly available and where they can be found: template data collection forms; data extracted from included studies; data used for all analyses; analytic code; any other materials used in the review. | Not applicable                  |

From: Page MJ, McKenzie JE, Bossuyt PM, Boutron I, Hoffmann TC, Mulrow CD, et al. The PRISMA 2020 statement: an updated guideline for reporting systematic reviews. *BMJ* 2021;372:n71. doi: 10.1136/bmj.n71

For more information, visit: <http://www.prisma-statement.org/>

For peer review only

# BMJ Open

## Improving the perception of respect for and the dignity of inpatients: A Systematic Review

|                                 |                                                                                                                                                                                                                    |
|---------------------------------|--------------------------------------------------------------------------------------------------------------------------------------------------------------------------------------------------------------------|
| Journal:                        | <i>BMJ Open</i>                                                                                                                                                                                                    |
| Manuscript ID                   | bmjopen-2021-059129.R1                                                                                                                                                                                             |
| Article Type:                   | Original research                                                                                                                                                                                                  |
| Date Submitted by the Author:   | 22-Feb-2022                                                                                                                                                                                                        |
| Complete List of Authors:       | E. P. Dutra, Pablo; UFRJ, Institute of Pyschiatry of UFRJ (IPUB/UFRJ)<br>Quagliato, Laiana; UFRJ, Institute of Psychiatry of UFRJ (IPUB/UFRJ)<br>Nardi, Antonio; UFRJ, Institute of Psychiatry of UFRJ (IPUB/UFRJ) |
| <b>Primary Subject Heading</b>: | Mental health                                                                                                                                                                                                      |
| Secondary Subject Heading:      | Mental health, Medical education and training, Global health, Ethics, Public health                                                                                                                                |
| Keywords:                       | MENTAL HEALTH, MEDICAL ETHICS, MEDICAL EDUCATION & TRAINING, PSYCHIATRY, PUBLIC HEALTH, QUALITATIVE RESEARCH                                                                                                       |
|                                 |                                                                                                                                                                                                                    |

SCHOLARONE™  
Manuscripts



I, the Submitting Author has the right to grant and does grant on behalf of all authors of the Work (as defined in the below author licence), an exclusive licence and/or a non-exclusive licence for contributions from authors who are: i) UK Crown employees; ii) where BMJ has agreed a CC-BY licence shall apply, and/or iii) in accordance with the terms applicable for US Federal Government officers or employees acting as part of their official duties; on a worldwide, perpetual, irrevocable, royalty-free basis to BMJ Publishing Group Ltd ("BMJ") its licensees and where the relevant Journal is co-owned by BMJ to the co-owners of the Journal, to publish the Work in this journal and any other BMJ products and to exploit all rights, as set out in our [licence](#).

The Submitting Author accepts and understands that any supply made under these terms is made by BMJ to the Submitting Author unless you are acting as an employee on behalf of your employer or a postgraduate student of an affiliated institution which is paying any applicable article publishing charge ("APC") for Open Access articles. Where the Submitting Author wishes to make the Work available on an Open Access basis (and intends to pay the relevant APC), the terms of reuse of such Open Access shall be governed by a Creative Commons licence – details of these licences and which [Creative Commons](#) licence will apply to this Work are set out in our licence referred to above.

Other than as permitted in any relevant BMJ Author's Self Archiving Policies, I confirm this Work has not been accepted for publication elsewhere, is not being considered for publication elsewhere and does not duplicate material already published. I confirm all authors consent to publication of this Work and authorise the granting of this licence.

**TITLE PAGE****Title: Improving the perception of respect for and the dignity of inpatients: A Systematic Review****Author name:**

Pablo Eduardo Pereira Dutra

**Co-authors' names:**

Laiana Azevedo Quagliato

Antonio Egidio Nardi

**Corresponding author:**

**Full name:** Pablo Eduardo Pereira Dutra

ORCID: 0000-0003-3970-5668

**Postal address:** Av. Venceslau Brás, 71, Botafogo, Rio de Janeiro, RJ, Brazil

ZIP Code: 22.290-140

**E-mail:** [pablo.medicina@ufrj.br](mailto:pablo.medicina@ufrj.br)

**Phone:** +55 21 3938-0500

**Fax:** +55 21 3938 0500

**Institution:**

Federal University of Rio de Janeiro (UFRJ)

Laboratory of Panic and Respiration (LABPR)

Institute of Psychiatry of UFRJ (IPUB/UFRJ)

**Full names, institutions, city, and country of all co-authors:**

**Full name:** Laiana Azevedo Quagliato

ORCID: 0000-0002-6928-5847

**Institution:**

Federal University of Rio de Janeiro (UFRJ)

Laboratory of Panic and Respiration (LABPR)

Institute of Psychiatry of the UFRJ (IPUB)

**City:** Rio de Janeiro

**Country:** Brazil

Full name: Antonio Egidio Nardi

ORCID: 0000-0002-2152-4669

**Institution:**

Federal University of Rio de Janeiro (UFRJ)

Laboratory of Panic and Respiration (LABPR)

Institute of Psychiatry of the UFRJ (IPUB)

**City:** Rio de Janeiro

**Country:** Brazil

**Keywords (MeSH terms):** Respect, Dignity, Patient rights, inpatients, privacy

**Word count:** 4,583



## Improving the perception of respect for and the dignity of inpatients: A Systematic Review

### ABSTRACT

**Objectives:** The aim of this systematic review is to find international evidence to determine which strategies are effective for improving hospitalized patients' perception of respect and dignity.

**Methods:** A systematic review of the literature was conducted in accordance with PRISMA 2020 guidelines and registered at PROSPERO (CRD42021241805). The MEDLINE/PubMed, PsycINFO and Cochrane Library databases were searched for observational studies, prospective studies, retrospective studies, controlled trials, and randomized controlled trials with interventions focused on improving respect for patients and maintaining their dignity. Studies with case report designs, editorials, opinion articles, studies <10 subjects, responses/replies to authors, and responses/replies to editors were excluded. The study population included patients admitted to hospitals, day hospitals, clinics, emergency departments, psychiatric emergencies, psychiatric hospitals, asylums, and any other places where there were inpatients. Systematic reviews were not included. Two evaluators assessed risk of bias using the following criteria from the Cochrane Handbook of Systematic Reviews of Interventions version 6.2: methods for allocation, methods for randomization, blinding, and evaluation of internal validity. The reviewers were blinded during the selection of studies as well as during the quality appraisal. Disagreements were resolved by consensus after the reviewers' judgment.

**Results:** A total of 2,515 articles were retrieved from the search to databases, and 44 articles were included in this review. We conducted a quality appraisal of the studies (27 qualitative studies, 14 cross-sectional studies, 1 cohort study, 1 quali-quantitative study and 1 convergent parallel mixed-method study).

**Conclusion:** There are many strategies that could be used to improve the perception of respect for and the maintenance of the dignity of the inpatient. The lack of interventional studies measuring effects in this field has led to a gap in knowledge that needs to be filled with studies with better designs and effect measurements.

**Keywords:** Respect, Dignity, Patient rights, inpatients, privacy

### STRENGTHS AND LIMITATIONS OF THIS STUDY

- This study covers a wide range of topics related to the respect and dignity of inpatients, reaching many countries around the world on virtually every continent.
- It fills a knowledge gap in an area that lacks more research and development.
- We bring important information on medical education in order to improve medical practice.
- More studies with controlled interventions and outcomes are necessary.
- It may not be appropriate to generalize these findings to all countries and cultures.

### INTRODUCTION

Dignity is a fundamental human right (1), and its maintenance is an ethical goal of care (2). The Brazilian Code of Medical Ethics (3) states that physicians must respect and act in patients' benefit. The Declaration on the Promotion of Patients' Rights in Europe (4), states that one of its objectives is "*to reaffirm fundamental human rights in health care*".

The concept of dignity is still not clearly defined (5), and it can be affected during hospitalization (6). Hospital routines are needed to promote and protect patient health, but they can be harmful when patients experience stigma (7), violation of rights, privacy, integrity, disrespect and breaches in confidentiality, and when facing unprepared and insecure professionals who cannot provide clear explanations about diagnostic and therapeutic

1 procedures. All of these can lead to complaints, which can be used as a tool for improving  
2 patient care (8).

3  
4 One may think that dignity and respect violations are restricted to low-income countries or to  
5 people of low socioeconomic status, but it is a worldwide phenomenon, and it is not directly  
6 related to wealth, but to culture and professional education. Several studies suggest that  
7 patients' rights are violated daily in practically all scenarios of practice of health-related  
8 activities. However, its results are sparse and there is no systematization of what can improve  
9 patients' perception of receiving respectful and dignified care.

10  
11 Published studies, as we will see later, address specific specialties in isolation and few address  
12 this important topic comprehensively. The strategies used to improve the quality of care and  
13 the perception of respect and dignity from the patients' point of view may seem obvious, but  
14 they are not observed in practice in several countries and continents. Thus, it is necessary to  
15 review the current literature in search of strategies that can positively impact patients'  
16 perception of respect and dignity.

## 17 18 19 **OBJECTIVE**

20 The aim of this systematic review is to evaluate worldwide evidence to determine which  
21 strategies can be used to improve inpatient patients' perception of respect and dignity.

## 22 23 24 **STUDY DESIGN**

25 A systematic review with the aim of identifying, analyzing, extracting and evaluating data from  
26 the literature related to respect for and maintenance of the dignity of hospitalized patients. It  
27 also aims to identify knowledge gaps and relate the findings to clinical practices to improve  
28 the quality of care for all hospitalized patients worldwide.

## 29 30 31 **METHODS**

32 This study was registered at PROSPERO (CRD42021241805) and conducted following  
33 PRISMA guidelines (9). Articles were identified by searching electronic records, including the  
34 MEDLINE/PubMed, PsycINFO and Cochrane Library databases. The quoted search terms  
35 used were as follows: Patient human rights violation OR Patient disrespect OR Patient violation  
36 of dignity OR Patient rights protection OR patient intimacy violation OR patient confidentiality  
37 violation OR ethical violation OR ethics violation OR hospital violation of patients' rights OR  
38 patients' perception of rights violation OR patients' perception of disrespect. There were no  
39 restrictions on year or language of publication, and no automation tool was used. The main  
40 objective was to find any interventions and multifaceted interventions aimed at improving  
41 inpatients' perception of respect and dignity and decreasing disrespect or human/inpatient  
42 rights violations, intimacy violations, confidentiality violations, autonomy violations, etc. The  
43 search included interventions conducted in hospitals, day hospitals, clinics, emergency  
44 departments, psychiatric emergencies, psychiatric hospitals, asylums, and any other places  
45 where there are inpatients. The inclusion criteria were full text, observational studies,  
46 prospective studies, retrospective studies, controlled trials, and randomized controlled trials.  
47 The exclusion criteria were case reports, editorials, opinion articles, studies <10 subjects,  
48 responses/replies to authors, and responses/replies to editors.

49 The first author (PEPD) screened the titles and abstracts of the articles and manually excluded  
50 those articles that did not fit the inclusion criteria.

51 After that, two reviewers (PEPD and LAQ) independently assessed the full texts of the  
52 remaining articles for eligibility in a standardized manner: data extraction was performed  
53 independently, and disagreements between reviewers regarding the study selection or data  
54 extraction were resolved by consensus. If a consensus was not reached, the third reviewer  
55 (AEN) was consulted.

56 The following information was extracted from the full-text articles using an Excel spreadsheet:  
57 authors, place/year of publication, sample size, type of samples, study design, analysis,  
58 data/measure, strategies, interventions to achieve improvements, and limitations.

Two reviewers assessed the risk of bias using the following criteria from the Cochrane Handbook of Systematic Reviews of Interventions version 6.2 (10). Disagreements were resolved by consulting a third reviewer. The minimum number of studies for data to be pooled was 10, including any intervention that would be effective for improving the perception of respect and dignity among inpatients.

A quality appraisal of the articles was performed using the CASP Qualitative Studies Checklist (11), Specialist Unit for Review Evidence (SURE) 2018 (12), CASP Cohort Study Checklist (13), and Mays & Pope Qualitative research in health care (14).

### ***Patient and public involvement***

No patient involved.

### ***Quality appraisal***

A critical appraisal of the included studies was performed, but no study was excluded based on its score, although this approach makes their analysis more robust. The instruments used for it were: CASP Qualitative Studies Checklist (11) (**Table 1**) (**See supplementary 1**); Specialist Unit for Review Evidence (SURE) - Questions to assist with the critical appraisal of cross-sectional Studies (12) (**Table 2**) (**See supplementary 2**); CASP Cohort Studies Checklist (13) (**Table 3**) (**See supplementary 3**) and the criteria put forth by Mays & Pope (2000) (14) (**Table 4**) (**See supplementary 4**).

They were scored as follows: 0 = not or inadequately addressed, 1 = partially addressed, and 2 = fully addressed criterion. Critical appraisal scores are described below each table.

The quality assessment of the studies and of the systematic review was performed by two reviewers independently (PEPD and LAQ), who then discussed and agreed to the final rating. No study was excluded for quality reasons, but this assessment enabled a more robust review of the studies.

### ***Risk of bias***

To minimize bias, two reviewers assessed the risk of bias using the following criteria from the Cochrane Handbook of Systematic Reviews of Interventions version 6.2 (10): methods for allocation, methods for randomization, blinding, and evaluation of internal validity. The reviewers were blinded during the selection of studies to be included and excluded as well as during the quality appraisal. Disagreements were resolved by consensus after the reviewers' judgment.

## **RESULTS**

Three databases were searched on March 9th, 2021: PubMed/MEDLINE, PsycINFO, and Cochrane Library. Of the 2,515 results, no article was excluded by automation tools, 3 were excluded after searching for duplicate studies using the EndnoteWeb tool, and 2,375 were excluded after title and abstract screening by the first reviewer (PEPD). In the second step, two reviewers (PEPD and LAQ) independently assessed the 121 articles for eligibility.

Thirteen references were not found. The first reviewer (PEPD) contacted by e-mail and/or via ResearchGate - more than once - authors, coauthors, and journals where they were published to try to retrieve them. Up to August 5th, 2021, 9 articles were retrieved, 3 were bought online from publishers, and 1 was not retrieved and excluded. A total of 76 articles were excluded: 50 did not include inpatients, 2 were not in the scope of this review, 4 were review/systematic review, 1 focused on health care professionals, 1 focused on the development of telehealth, 12 were essay/commentary/thoughts, 2 included less than 10 patients, 1 was a study protocol, and 3 were scale developments.

Forty-four articles were included, according to PRISMA 2020 guidelines (9) (**Figure 1**): 14 cross-sectional studies, 1 cohort study, 1 quali-quantitative study, 1 convergent parallel mixed-method study, and 27 qualitative studies.

1 The results of articles classified as high-quality in the quality assessment receive more  
2 emphasis than those with a lower classification. They were divided according to the main  
3 themes.  
4

### 6 ***Religion, emergency, psychiatric and pediatric patients***

7 Violations of patients' dignity and privacy are almost routine. The simple act of providing a  
8 patient list to third parties for religious visits without consent is considered a violation of  
9 privacy (15). Likewise, the seclusion to which psychiatric patients in agitation are subjected,  
10 often as a form of punishment, also constitutes a violation of dignity, as they are often not  
11 offered liquids and food, which makes them feel humiliated (16, 17).

12 In all cases, there is a fundamental element missing, communication. In pediatrics, for example,  
13 the lack of communication between doctors and parents and patients produces anxiety and  
14 confusion (18), which could be avoided if the professional talked to families in an open and  
15 understanding way, demonstrating knowledge and security in their work. This same feeling of  
16 vulnerability and powerlessness is experienced by emergency patients, considered of low  
17 priority, as they feel insecure, exposed and violated in their self-esteem, as they wait for  
18 professional attention for several hours in some cases (19). When the patient is of a different  
19 ethnicity from that of the doctor, this feeling of inferiority increases, as patients feel the need  
20 to be treated as equals, as people, as being important and want to have their complaints heard,  
21 receive polite, timely and with clear explanations (20).  
22  
23  
24  
25

### 26 ***Obstetric patients***

27 The feeling of invasion of privacy and lack of respect and dignity is common among obstetric  
28 patients from the first contact with obstetricians, as there is a lack of training in Respectful  
29 Maternity Care (RMC), counseling skills, in building a good physician-patient relationship  
30 (21). Professionals allege overwork, low and inadequate remuneration, lack of training,  
31 precarious and inadequate working conditions, overload due to lack of professionals (22),  
32 which can improve with investment in training, in more dignified working conditions, in  
33 improving of remuneration, in the availability of contact with other professionals for learning  
34 and consultations, as well as with a better understanding of the cultural context of the patient  
35 and the professional (23,24). Better communication between professionals and pregnant  
36 women and mothers can contribute to building a relationship of trust, promoting their  
37 engagement in breastfeeding and baby care (25).  
38

39 The female body undergoes several transformations during pregnancy, such as weight gain.  
40 Some pregnant women feel embarrassed by their doctors, due to stigma related to their weight  
41 gain, which can undermine the doctor-patient relationship (26). In Jordan, for example, women  
42 end up seeking private assistance in search of a little more respect for their privacy, since public  
43 hospitals lack sheets to cover themselves, leaving their bodies and intimacy exposed (27).  
44

45 The promotion of RMC among women and health professionals can improve the quality of  
46 care provided (28), reduce social stigma, as women with lower levels of education and lower  
47 socioeconomic status feel stigmatized and perceive that they are treated with less quality than  
48 than others with better economic and social status (29). Disrespectful, unkind, rude and  
49 negativistic behaviors only contribute to increase the level of stress and generate distrust in the  
50 parturient, who has often denied her right to a companion, feeling uninformed, abandoned,  
51 neglected and objectified during childbirth and postpartum (31-34).  
52

53 In rural Afghanistan, the training of professionals had a positive impact on the satisfaction of  
54 pregnant women in relation to health services, although there are still complaints (35), related  
55 to disrespect, low quality of services, maltreatment and disagreements between doctors and  
56 patients (36), as well as in Peru, where most research participants had already suffered at least  
57 one episode of disrespect and abuse during pregnancy and childbirth (37). The World Health  
58 Organization (WHO) recommends improvements in the quality of treatment and care for  
59 women to reduce stigma and poor care and to promote respect and dignity (38,39).  
60

### ***General hospital patients***

Cultural and ethnic differences between nurses and patients can contribute to negative perceptions of disrespectful and unfair treatment, particularly among ethnic minorities (40,41). Thus, it is necessary for health professionals to be attentive to recognize factors that violate or preserve dignity from the patient's point of view (42), such as interpersonal problems, professional availability and lack of empathy in communication (43), even when the patient does not actively complain, the professional must take a more proactive stance to identify and respond to the patient's needs in a timely manner, with strategies to improve patient safety, promoting their involvement in the care of their health (44,45). To this end, managers need to be sensitized to invest in professional education, in order to keep professionals attentive to patients' rights, reducing treatment inequities that lead patients to pilgrimage through health services in search of more dignified treatment (46,47).

Professional development should also promote strategies that ensure patients' privacy, not only of their personal and health information (48), since a leak can undermine the reputation of a health facility, as patients bring to the hospital expectations of receive security, respect, dignity, information and care (49). Touching patients' personal objects or moving them can be perceived as an invasion of territory and privacy, causing discomfort (50), reinforcing the need to provide information about privacy and confidentiality before and during hospitalization (51). A Greek study showed that patients had little idea of their rights (52) and nursing has a very important role in disseminating this knowledge and ethical principles, establishing a relationship of respect for patients' rights and privacy (53-55). Intensive care unit (ICU) patients often have memories of the environment as hostile and stressful, generating negative feelings of violation of their rights to dignity and privacy, lack of empathy, not being understood, delay in getting help and be subject to full control by health professionals (56).

Most patients are unaware of their rights (57); a study with the distribution of information cards to patients with methicillin-resistant *S. aureus* (MRSA) infection, which should be presented to the professionals with whom they would consult, showed that these patients are subject to discrimination and lack of knowledge, which makes its use questionable (58). It is therefore imperative that healthcare professionals keep the concept of integrity in mind and that this knowledge be used to train healthcare professionals with more professionalism, communication skills, and practice-based learning (59, 60). In an increasingly digital age, resources for preserving information and privacy are essential, since patients' autonomy is closely intertwined with their dignity (61-63), which can positively impact the quality of empathic, non-possessive care, authentic and respectful, with positive results in treatment outcomes (64).

### **DISCUSSION**

These studies reveal that there are several strategies that can improve the quality of care provided to inpatients, thus improving their perception of respect for and the maintenance of their dignity. There is a Hippocratic principle that guides the medical profession, "first, do no harm" and that must be considered in all spheres not only of the doctor-patient relationship, but of any relationship between health professionals and patients. Therefore, although we did not find studies with statistically calculated interventions and effect size measurements, the quality of the studies included in this systematic review allows us to point out some strategies that can help improve patients' perceptions regarding respect for and maintenance of their dignity. Patients and health professionals around the world express the same interests and desires to have the quality of care raised to the level of excellence and the rights of patients respected.

It is necessary to keep in mind that minor violations of patients' rights happen daily, even when it is considered to have good intentions, as in the case of visits by religious to patients. Their names cannot be placed on a list without consent, as this constitutes an invasion of privacy. Likewise, when a patient needs mechanical restraint or seclusion due to aggressiveness, it is necessary to offer fluids, food and attention, to understand why the patient acted that way, as

1 many see this attitude as a violation of human rights or as punishment, so that the experience  
2 fulfills its therapeutic goals and does not become a source of trauma for the patient or a painful  
3 psychic experience.  
4

5 One of the keys to good relationships with patients is communication. Parents of pediatric  
6 patients, as well as patients themselves, need clear information, which gives them a sense of  
7 confidence and security. Professionals need to demonstrate skill, knowledge and confidence  
8 during their interventions, in order to guarantee the best treatment for their patients and to allow  
9 patients and their parents to make the best decisions for the quality of life of their children.

10 Feelings of humiliation, impotence and being “left aside” affect emergency patients, with lower  
11 risk conditions, which makes them wait for care for long periods. These patients need to receive  
12 information about their conditions and the functioning of the emergency department, they must  
13 receive information and attention from the nursing staff, as their condition can progress to more  
14 serious situations or death, if they are not checked frequently. When patients have different  
15 ethnicities than professionals, the asymmetry of the relationship seems to be exacerbated by  
16 the behavior of some professionals, leading patients to feel discriminated against, treated in a  
17 dehumanized and disrespectful way. Allowing the patient to speak, listening to the patient  
18 carefully and valuing their complaints and opinions gives them the feeling of being respected  
19 and seen as an equal person. Professionals must be aware of these subtleties of human behavior  
20 and spend more time assisting these patients in a way that makes them feel more respected and  
21 welcomed. These small actions can make a difference when a patient seeks treatment or  
22 professional help.  
23

24 The field of obstetrics is one of the fields that has more studies on the respect and dignity of  
25 patients, including the prepartum, pregnancy and postpartum periods. It is necessary for  
26 professionals in the field to be trained regarding Respectful Maternity Care (RMC). It is a  
27 woman's right to receive clear information; respectful and dignified treatment; to hug and  
28 breastfeed her child in the immediate postpartum period; to have her intimacy and privacy  
29 preserved; not being subjected to episiotomy without consent or without anesthesia; having a  
30 family member accompanying them; not being discriminated against because of their weight,  
31 ethnicity, color, race, sexuality, religion, socioeconomic status, place of residence, state or  
32 country of origin; to have a companion during childbirth, whether a family member or friend;  
33 the right not to be verbally or physically abused (not to be cursed or verbally humiliated; not  
34 to be slapped during childbirth, for example); the right not to have their bodies exposed in a  
35 hospital environment, where there is a large circulation of professionals (to be covered by a  
36 sheet); the right not to have their bodies invaded by several individuals (not being exposed to  
37 frequent vaginal examinations by various professionals, especially in teaching hospitals); the  
38 right to receive information about prenatal care, pregnancy, childbirth, postpartum,  
39 breastfeeding, contraception, vaccination and infectious-contagious diseases that can affect the  
40 mother and baby; the right to have quality and humanized care in any device in the care  
41 network, whether public or private; the right to receive analgesia or anesthesia; and the right to  
42 have less prolonged care, whether public or private.  
43

44 Obstetric violence is present in several fields of action, among the various health professionals  
45 who work in this area, from harshly speaking to or yelling at, to physically or sexually  
46 assaulting a woman. Considering the most diverse studies on the subject, this practice is  
47 widespread in several countries around the world, from the U.S. to Asian countries, and there  
48 needs to be a large investment in education and training of health professionals so that women  
49 of childbearing age can be assisted with dignity and respect.  
50

51 Professionals should be aware of the cultural subtleties of the patients they serve, as many  
52 behaviors may seem inappropriate in multicultural contexts, as the patient's education, culture,  
53 socioeconomic level and religion produce different perceptions about the professionals'  
54 conduct. This can lead to negative perceptions and complaints, for example regarding  
55 discrimination and quality of care.  
56

57 A conciliatory and more proactive attitude towards avoiding conflicts can improve patients'  
58 perception of the professional and the health facility during the hospitalization period. The  
59  
60

1 investment in training and education of health professionals is the best solution to improve the  
2 quality of care, bringing patients to a more active position in their treatment, promoting  
3 information and autonomy, providing assistance in a timely manner, respecting rights,  
4 maintaining vigilance in cases of disrespect and violations of dignity, encouraging the  
5 acceptance of differences, reducing all types of prejudice and stigma, and allowing  
6 professionals and patients to act together.

7  
8 Small attitudes of health professionals can turn into big problems: touching personal  
9 belongings without authorization, moving objects, exposing the patient and making  
10 inappropriate comments, even though it may seem like just an innocent joke. One of the  
11 solutions may be to ask patients and family members to carry out assessments about the service,  
12 analyze complaints in the ombudsman's office, and use these data as important tools to improve  
13 the quality of the service provided. Patient concern regarding the confidentiality of their  
14 medical information is another point that deserves attention. The right to privacy and  
15 confidentiality is directly related to the respect and dignity of patients. Violations of  
16 confidentiality, in addition to being unethical, can cause moral and financial damage to patients  
17 and their families, leading to legal actions against professionals and hospitals. Another way to  
18 give patients more freedom and autonomy is to guarantee them access to their medical  
19 information, either through direct access to the system or through applications. Thus, managers  
20 and government officials must invest in information security systems, since the world is  
21 increasingly digital and the trend is to reduce the use of printed documents, ensuring the  
22 protection of data for patients and professionals. Patients must receive information about  
23 current legislation in terms of information security, their rights to privacy and confidentiality,  
24 and nursing has a fundamental role in the dissemination of ethical principles in the work  
25 environment.

26  
27 The results found in the articles included in this systematic review show that there is still a long  
28 way to go in promoting more dignified and respectful care for patients admitted to health care  
29 units around the world. The innovation is in the synthesis and enumeration of these practices,  
30 which can bring a new way of dealing with information and profoundly change the way we  
31 serve and think about the care provided to hospitalized patients. Regardless of culture and  
32 nationality, studies show that there is a need to improve the quality of care, whether through  
33 improvements in education during graduation, in student training, in the use of reality data to  
34 refine professional practice, or through training of professionals when entering the labor  
35 market, offering refresher courses, recycling professionals and promoting the availability of  
36 safe means by which professionals can discuss cases and share knowledge without breaching  
37 professional secrecy.

### 38 39 40 41 42 43 **STRENGTHS OF THIS STUDY**

44 Our study covers a wide range of topics related to the respect and dignity of inpatients, reaching  
45 many countries around the world on virtually every continent. In addition, this systematic  
46 review fills a knowledge gap in an area that has not yet been studied, which, although gaining  
47 prominence in recent years, lacks more research and development. The fact that there is no  
48 limitation on the time researched and, on the language, allowed us to reach from the most recent  
49 to the oldest studies on this topic.

### 50 51 52 **LIMITATIONS**

53 Although we have tried to reach as many studies as possible, its results cannot be generalized  
54 to all cultures and countries of the world, and it does not include all specialties and their  
55 peculiarities. One study could not be retrieved, and it might have data that could be important  
56 to the results of this study. The data were not homogeneous enough to perform a meta-analysis,  
57 which would enrich the results. More studies with controlled interventions and outcomes  
58 should be carried out to measure the effect on the perception of respect for and maintenance of  
59 the dignity of hospitalized patients.  
60

## STATEMENT OF FINDINGS

Regarding clinical practice, our study brings several collaborations based on the findings of the reviewed articles. Actions to promote dignity include: providing information correctly and clearly about procedures and treatments, serving with politeness and kindness, avoiding gestures and comments that might be perceived as disrespectful, putting aside prejudices (you are not there to judge but to serve to the best of your ability and professional ethics), taking as much time to serve as necessary, adhering to confidentiality when sharing information with team members, listening to complaints and trying to resolve them, responding to timely calls, using patient complaints made as a way to improve the hospital routine, promoting improvements in the quality of the environment (including cleaning, lighting and noise control), allowing pregnant women to have companions, avoiding yelling at patients or using physical touch as a form of reprimand (which can be understood as physical aggression), avoiding unnecessary exposure of the patient's body, avoiding intimate examination by various professionals (especially in teaching hospitals), obtaining consent for diagnostic and therapeutic procedures, informing patients about the drugs that will be applied (name and what they are used for), introducing oneself to the patient, asking if the patient wants to receive visits and from whom, asking who the patient would like to share information with, calling the patient by his or her name (avoiding colloquial or derogatory language), demonstrating knowledge, showing security and professional skills, and using setbacks as opportunities for your own and for your team's collective learning.

## IMPLICATIONS FOR PRACTICE

Our findings provide perspectives that could and should be used to improve patient care and education in different areas of health around the world.

## IMPLICATIONS FOR RESEARCH

Virtually all studies related to the quality of care, respect, dignity, confidentiality and privacy of hospitalized patients, have a qualitative or cross-sectional design. It is necessary that future research be designed with controlled interventions and effect size measurement to bring more robustness to the findings, since this subject is gaining prominence in daily practice. Furthermore, regardless of the country, respect and dignity are universal and fundamental rights of every human being and must, therefore, be put into practice wherever patients are.

## CONCLUSION

Our systematic review touches on important points of care during professional practice, with the aim of delivering truly patient-centered care to patients.

Professional practice is regulated by legal means and by professional education, but it is observed that there is a lack of training so that various everyday conflicts can be mitigated and resolved locally without harming the patient. It is inconceivable that patients need to look for another health facility because they feel mistreated at a place that should provide care. Likewise, it is unacceptable for a health professional not to be able to handle situations in their professional routine without resorting to violence or verbal aggression. When a patient goes to a health unit, he or she seeks care; therefore, we have the obligation to provide care, without prejudice, without discrimination and to the best of our technical capacity, with respect and dignity. This is the wish of all patients around the world.

## REGISTRATION AND PROTOCOL

This study protocol was registered at PROSPERO (CRD42021241805 - Improving the perception of respect for and the dignity of the inpatient: A Review), and it was conducted in accordance with PRISMA 2020 guidelines (9).

## FUNDING

This study has no external funding source.



## CONFLICTS OF INTEREST

The authors declare that they have no competing interests.

## CONTRIBUTORSHIP STATEMENT

The study concept was developed by PEPD. The manuscript of the protocol was drafted by PEPD and critically revised by LAQ and AEN. PEPD developed and provided feedback for all sections of the review protocol and approved the final manuscript. The search strategy was developed by PEPD and LAQ. Study selection was performed by PEPD and LAQ. Data extraction and quality assessment was performed by PEPD and LAQ, with AEN as a third party in case of disagreements. All authors have approved the final version of the manuscript.

## DATA AVAILABILITY STATEMENT

No additional data available.

## REFERENCES

- 1) United Nations. Universal Declaration of Human Rights | united nations. [cited 2021 June 8]; Available from: <https://www.un.org/en/about-us/universal-declaration-of-human-rights>
- 2) Ferri P, Muzzalupo J, Di Lorenzo R. Patients' perception of dignity in an Italian general hospital: a cross-sectional analysis. *BMC Health Serv Res.* 2015;15(1):41-48.
- 3) Conselho Federal de Medicina. Código de Ética Médica [Internet]. Conselho Federal de Medicina. 2019 [cited 2021 June 8]. Available from: <https://portal.cfm.org.br/images/PDF/cem2019.pdf>
- 4) World Health Organization (WHO). A Declaration on the Promotion of Patients Rights in Europe. [Internet] 1994. [cited 2021 June 08]. Available from: [https://www.who.int/genomics/public/eu\\_declaration1994.pdf](https://www.who.int/genomics/public/eu_declaration1994.pdf)
- 5) Bagheri A. Elements of human dignity in healthcare settings: the importance of the patient's perspective. *J Med Ethics.* 2012;38(12):729–30.
- 6) Campillo B, Corbella J, Gelpi M, Martinez E, Viciano MA, Alonso M. Development and validation of the scale of perception of respect for and maintenance of the dignity of the inpatient [CuPDPH]. *Ethics Med Public Health.* 2020;15(100553):100553.
- 7) Phelan SM, Burgess DJ, Yeazel MW, Hellerstedt WL, Griffin JM, van Ryn M. Impact of weight bias and stigma on quality of care and outcomes for patients with obesity: Obesity stigma and patient care. *Obes Rev.* 2015;16(4):319–26.
- 8) Mirzoev T, Kane S. Key strategies to improve systems for managing patient complaints within health facilities - what can we learn from the existing literature? *Glob Health Action.* 2018;11(1):1458938.

- 1 9) Page MJ, McKenzie JE, Bossuyt PM, Boutron I, Hoffmann TC, Mulrow CD, et al. The  
2 PRISMA 2020 statement: an updated guideline for reporting systematic reviews. *Syst Rev.*  
3 2021;10(1):89.
- 4  
5  
6 10) Chapter 7: Considering bias and conflicts of interest among the included studies  
7 [Internet]. *Cochrane.org*. [cited 2021 June 8]. Available from:  
8 <https://training.cochrane.org/handbook/current/chapter-07>
- 9  
10 11) Critical Appraisal Skills Programme. CASP Qualitative Studies Checklist [Internet]. B-  
11 *cdn.net*. [cited 2021 Jul 6]. Available from: [https://casp-uk.b-cdn.net/wp-](https://casp-uk.b-cdn.net/wp-content/uploads/2018/03/CASP-Qualitative-Checklist-2018_fillable_form.pdf)  
12 [content/uploads/2018/03/CASP-Qualitative-Checklist-2018\\_fillable\\_form.pdf](https://casp-uk.b-cdn.net/wp-content/uploads/2018/03/CASP-Qualitative-Checklist-2018_fillable_form.pdf)
- 13  
14 12) Specialist Unit for Review Evidence (SURE). Questions to assist with the critical  
15 appraisal of cross-sectional studies [Internet]. *Cardiff.ac.uk*. 2015 [cited 2021 Jul 9]. Available  
16 from:  
17 [https://www.cardiff.ac.uk/\\_\\_data/assets/pdf\\_file/0006/212775/SURE\\_Qualitative\\_checklist\\_](https://www.cardiff.ac.uk/__data/assets/pdf_file/0006/212775/SURE_Qualitative_checklist_2015.pdf)  
18 [2015.pdf](https://www.cardiff.ac.uk/__data/assets/pdf_file/0006/212775/SURE_Qualitative_checklist_2015.pdf)
- 19  
20 13) Critical Appraisal Skills Programme. CASP Cohort Study Checklist [Internet]. B-  
21 *cdn.net*. [cited 2021 Jul 26]. Available from: [https://casp-uk.b-cdn.net/wp-](https://casp-uk.b-cdn.net/wp-content/uploads/2018/03/CASP-Cohort-Study-Checklist-2018_fillable_form.pdf)  
22 [content/uploads/2018/03/CASP-Cohort-Study-Checklist-2018\\_fillable\\_form.pdf](https://casp-uk.b-cdn.net/wp-content/uploads/2018/03/CASP-Cohort-Study-Checklist-2018_fillable_form.pdf)
- 23  
24 14) Mays N, Pope C. Qualitative research in health care. Assessing quality in qualitative  
25 research. *BMJ*. 2000;320(7226):50–2.
- 26  
27 15) Erde E, Pomerantz SC, Saccocci M, Kramer-Feeley V, Cavalieri TA. Privacy and  
28 patient-clergy access: perspectives of patients admitted to hospital. *J Med Ethics.*  
29 2006;32(7):398–402.
- 30  
31 16) Faschingbauer KM, Peden-McAlpine C, Tempel W. Use of seclusion: finding the voice  
32 of the patient to influence practice. *J Psychosoc Nurs Ment Health Serv.* 2013;51(7):32–8.
- 33  
34 17) Robins CS, Sauvageot JA, Cusack KJ, Suffoletta-Maierle S, Frueh BC. Consumers’  
35 perceptions of negative experiences and “sanctuary harm” in psychiatric settings. *Psychiatr*  
36 *Serv.* 2005;56(9):1134–8.
- 37  
38 18) Hsiao JL, Evan EE, Zeltzer LK. Parent and child perspectives on physician  
39 communication in pediatric palliative care. *Palliat Support Care.* 2007;5(4):355–65.
- 40  
41 19) Adolfsson A, Dahlén, Westin. Experience of being a low priority patient during waiting  
42 time at an emergency department. *Psychol Res Behav Manag.* 2012;5:1-9.
- 43  
44 20) Beach MC, Branyon E, Saha S. Diverse patient perspectives on respect in healthcare:  
45 A qualitative study. *Patient Educ Couns.* 2017;100(11):2076–80.
- 46  
47  
48  
49  
50  
51  
52  
53  
54  
55  
56  
57  
58  
59  
60

- 1  
2 21) Burrowes S, Holcombe SJ, Jara D, Carter D, Smith K. Midwives' and patients'  
3 perspectives on disrespect and abuse during labor and delivery care in Ethiopia: a qualitative  
4 study. *BMC Pregnancy Childbirth*. 2017;17(1):263-74.  
5  
6 22) Dynes MM, Twentyman E, Kelly L, Maro G, Msuya AA, Dominico S, et al. Patient  
7 and provider determinants for receipt of three dimensions of respectful maternity care in  
8 Kigoma Region, Tanzania-April-July, 2016. *Reprod Health [Internet]*. 2018;15(1):41-64.  
9  
10 23) Gebremichael MW, Worku A, Medhanyie AA, Berhane Y. Mothers' experience of  
11 disrespect and abuse during maternity care in northern Ethiopia. *Glob Health Action*.  
12 2018;11(sup3):1465215.  
13  
14 24) Gebremichael MW, Worku A, Medhanyie AA, Edin K, Berhane Y. Women suffer more  
15 from disrespectful and abusive care than from the labour pain itself: a qualitative study from  
16 Women's perspective. *BMC Pregnancy Childbirth*. 2018;18(1):392-97.  
17  
18 25) Horwood C, Haskins L, Luthuli S, McKerrow N. Communication between mothers and  
19 health workers is important for quality of newborn care: a qualitative study in neonatal units in  
20 district hospitals in South Africa. *BMC Pediatr*. 2019;19(1):496-508.  
21  
22 26) Incollingo Rodriguez AC, Smieszek SM, Nippert KE, Tomiyama AJ. Pregnant and  
23 postpartum women's experiences of weight stigma in healthcare. *BMC Pregnancy Childbirth*.  
24 2020;20(1):499-508.  
25  
26 27) Hussein SAAA, Dahlen HG, Ogunsiyi O, Schmied V. Uncovered and disrespected. A  
27 qualitative study of Jordanian women's experience of privacy in birth. *Women Birth*.  
28 2020;33(5):496-504.  
29  
30 28) Jolly Y, Aminu M, Mgawadere F, van den Broek N. "We are the ones who should make  
31 the decision" - knowledge and understanding of the rights-based approach to maternity care  
32 among women and healthcare providers. *BMC Pregnancy Childbirth*. 2019;19(1):42-9.  
33  
34 29) Kanengoni B, Andajani-Sutjahjo S, Holroyd E. Women's experiences of disrespectful  
35 and abusive maternal health care in a low resource rural setting in eastern Zimbabwe.  
36 *Midwifery*. 2019;76:125-31.  
37  
38 30) Khresheh R, Barclay L, Shoqirat N. Caring behaviours by midwives: Jordanian  
39 women's perceptions during childbirth. *Midwifery*. 2019;74:1-5.  
40  
41 31) Kujawski S, Mbaruku G, Freedman LP, Ramsey K, Moyo W, Kruk ME. Association  
42 between disrespect and abuse during childbirth and women's confidence in health facilities in  
43 Tanzania. *Matern Child Health J*. 2015;19(10):2243-50.  
44  
45 32) McMahan SA, George AS, Chebet JJ, Moshia IH, Mpembeni RNM, Winch PJ.  
46 Experiences of and responses to disrespectful maternity care and abuse during childbirth; a  
47  
48  
49  
50  
51  
52  
53  
54  
55  
56  
57  
58  
59  
60

1  
2 qualitative study with women and men in Morogoro Region, Tanzania. *BMC Pregnancy*  
3 *Childbirth*. 2014;14:268-80.

4  
5 33) Millicent Dzomeku V, van Wyk B, Lori JR. Experiences of women receiving childbirth  
6 care from public health facilities in Kumasi, Ghana. *Midwifery*. 2017;55:90–5.

7  
8 34) Rodríguez-Almagro J, Hernández-Martínez A, Rodríguez-Almagro D, Quirós-García  
9 JM, Martínez-Galiano JM, Gómez-Salgado J. Women's perceptions of living a traumatic  
10 childbirth experience and factors related to a birth experience. *Int J Environ Res Public Health*.  
11 2019;16(9):1654-66.

12  
13 35) Thommesen T, Kismul H, Kaplan I, Safi K, Van den Bergh G. “The midwife helped  
14 me ... otherwise I could have died”: women's experience of professional midwifery services in  
15 rural Afghanistan - a qualitative study in the provinces Kunar and Laghman. *BMC Pregnancy*  
16 *Childbirth*. 2020;20(1):140-56.

17  
18 36) Vedam S, Stoll K, Taiwo TK, Rubashkin N, Cheyney M, Strauss N, et al. The Giving  
19 Voice to Mothers study: inequity and mistreatment during pregnancy and childbirth in the  
20 United States. *Reprod Health*. 2019;16(1):77-94.

21  
22 37) Montesinos-Segura R, Urrunaga-Pastor D, Mendoza-Chuctaya G, Taype-Rondan A,  
23 Helguero-Santin LM, Martinez-Ninanqui FW, et al. Disrespect and abuse during childbirth in  
24 fourteen hospitals in nine cities of Peru. *Int J Gynaecol Obstet*. 2018;140(2):184–90.

25  
26 38) The White Ribbon Alliance. Respectful Maternity Care: The Universal Rights of  
27 Childbearing Women [Internet]. *Healthpolicyproject.com*. [cited 2021 Aug 22]. Available  
28 from: [http://www.healthpolicyproject.com/pubs/46\\_FinalRespectfulCareCharter.pdf](http://www.healthpolicyproject.com/pubs/46_FinalRespectfulCareCharter.pdf)

29  
30 39) WHO Statement. The prevention and elimination of disrespect and abuse during  
31 facility-based childbirth [Internet]. *Who.int*. [cited 2021 Aug 22]. Available from:  
32 [https://apps.who.int/iris/bitstream/handle/10665/134588/WHO\\_RHR\\_14.23\\_eng.pdf](https://apps.who.int/iris/bitstream/handle/10665/134588/WHO_RHR_14.23_eng.pdf)

33  
34 40) Asmaningrum N, Kurniawati D, Tsai Y-F. Threats to patient dignity in clinical care  
35 settings: A qualitative comparison of Indonesian nurses and patients. *J Clin Nurs*. 2020;29(5–  
36 6):899–908.

37  
38 41) Blanchard J, Lurie N. R-E-S-P-E-C-T: patient reports of disrespect in the health care  
39 setting and its impact on care. *J Fam Pract*. 2004;53(9):721–30.

40  
41 42) Ebrahimi H, Torabizadeh C, Mohammadi E, Valizadeh S. Patients' perception of  
42 dignity in Iranian healthcare settings: a qualitative content analysis. *J Med Ethics*.  
43 2012;38(12):723–8.

44  
45 43) King JD, van Dijk PAD, Overbeek CL, Hageman MGJS, Ring D. Patient complaints  
46 emphasize non-technical aspects of care at a tertiary referral hospital. *Arch Bone Jt Surg*.  
47 2017;5(2):74–81.

- 1  
2 44) Howard M, Fleming ML, Parker E. Patients do not always complain when they are  
3 dissatisfied: implications for service quality and patient safety. *J Patient Saf.* 2013;9(4):224–  
4 31.  
5  
6 45) Hrisos S, Thomson R. Seeing it from both sides: do approaches to involving patients in  
7 improving their safety risk damaging the trust between patients and healthcare professionals?  
8 An interview study. *PLoS One.* 2013;8(11):e80759.  
9  
10 46) Khademi M, Mohammadi E, Vanaki Z. On the violation of hospitalized patients' rights:  
11 A qualitative study. *Nurs Ethics.* 2019;26(2):576–86.  
12  
13 47) Fleury S, Bicudo V, Rangel G. Reacciones a la violencia institucional: estrategias de  
14 los pacientes frente al contraderecho a la salud en Brasil. *Salud Colect.* 2013;9(1):11–25.  
15  
16 48) Kuo K-M, Ma C-C, Alexander JW. How do patients respond to violation of their  
17 information privacy? *Health Inf Manag.* 2014;43(2):23–33.  
18  
19 49) Lee AV, Moriarty JP, Borgstrom C, Horwitz LI. What can we learn from patient  
20 dissatisfaction? An analysis of dissatisfying events at an academic medical center. *J Hosp Med.*  
21 2010;5(9):514–20.  
22  
23 50) Marin CR, Gasparino RC, Puggina AC. The perception of territory and personal space  
24 invasion among hospitalized patients. *PLoS One.* 2018;13(6):e0198989.  
25  
26 51) Mohammadi M, Larijani B, Emami Razavi SH, Fotouhi A, Ghaderi A, Madani SJ, et  
27 al. Do patients know that physicians should be confidential? study on patients' awareness of  
28 privacy and confidentiality. *J Med Ethics Hist Med.* 2018;11:1-7.  
29  
30 52) Merakou K, Dalla-Vorgia P, Garanis-Papadatos T, Kourea-Kremastinou J. Satisfying  
31 Patients' Rights: a hospital patient survey. *Nurs Ethics.* 2001;8(6):499–509.  
32  
33 53) Ming Y, Wei H, Cheng H, Ming J, Beck M. Analyzing patients' complaints:  
34 Awakening of the ethic of belonging: Awakening of the ethic of belonging. *ANS Adv Nurs*  
35 *Sci.* 2019;42(4):278–88.  
36  
37 54) Öztürk H, Torun Kılıç Ç, Kahriman İ, Meral B, Çolak B. Assessment of nurses' respect  
38 for patient privacy by patients and nurses: A comparative study. *J Clin Nurs.* 2021;30(7–  
39 8):1079–90.  
40  
41 55) Pupulim JSL, Sawada NO. Percepção de pacientes sobre a privacidade no hospital. *Rev*  
42 *Bras Enferm.* 2012;65(4):621–9.  
43  
44 56) Sanson G, Lobefalo A, Fasci A. “Love can't be taken to the hospital. If it were possible,  
45 it would be better”: Patients' experiences of being cared for in an intensive care unit. *Qual*  
46 *Health Res.* 2021;31(4):736–53.  
47  
48 57) Santos LR, Beneri RL, Lunardi VL. Ethical questions in the work of the health team:  
49 the (dis)respect to client's rights. *Rev Gaucha Enferm.* 2005;26(3):403–13.  
50  
51  
52  
53  
54  
55  
56  
57  
58  
59  
60

- 1  
2 58) Skyman E, Bergbom I, Lindahl B, Larsson L, Lindqvist A, Thunberg Sjöström H, et al.  
3 Notification card to alert for methicillin-resistant *Staphylococcus aureus* is stigmatizing from  
4 the patient's point of view. *Scand J Infect Dis*. 2014;46(6):440–6.  
5  
6 59) Widäng I, Fridlund B. Self-respect, dignity and confidence: conceptions of integrity  
7 among male patients: Conceptions of integrity among male patients. *J Adv Nurs*.  
8 2003;42(1):47–56.  
9  
10 60) Wofford MM, Wofford JL, Bothra J, Kendrick SB, Smith A, Lichstein PR. Patient  
11 complaints about physician behaviors: a qualitative study. *Acad Med*. 2004;79(2):134–8.  
12  
13 61) Kayaalp M. Patient privacy in the era of big data. *Balkan Med J*. 2018;35(1):8–17.  
14  
15 62) Rodríguez-Prat A, Monforte-Royo C, Porta-Sales J, Escribano X, Balaguer A. Patient  
16 perspectives of dignity, autonomy and control at the end of life: Systematic review and meta-  
17 ethnography. *PLoS One*. 2016;11(3):e0151435.  
18  
19 63) Kisvetrová H, Tomanová J, Hanáčková R, Greaves PJ, Steven A. Dignity and predictors  
20 of its change among inpatients in long-term care. *Clin Nurs Res*. 2021;10547738211036968.  
21  
22 64) Kallergis G. The contribution of the relationship between therapist-patient and the  
23 context of the professional relationship. *Psychiatrike*. 2019;30(2):165–74.  
24  
25  
26  
27  
28  
29  
30  
31  
32

### 33 **COPYRIGHT/LICENSE FOR PUBLICATION**

34  
35 “The Corresponding Author has the right to grant on behalf of all authors and does grant on  
36 behalf of all authors, a worldwide licence to the Publishers and its licensees in perpetuity, in  
37 all forms, formats and media (whether known now or created in the future), to i) publish,  
38 reproduce, distribute, display and store the Contribution, ii) translate the Contribution into  
39 other languages, create adaptations, reprints, include within collections and create summaries,  
40 extracts and/or, abstracts of the Contribution, iii) create any other derivative work(s) based on  
41 the Contribution, iv) to exploit all subsidiary rights in the Contribution, v) the inclusion of  
42 electronic links from the Contribution to third party material where-ever it may be located;  
43 and, vi) licence any third party to do any or all of the above.”  
44  
45  
46  
47  
48  
49  
50  
51  
52  
53  
54  
55  
56  
57  
58  
59  
60

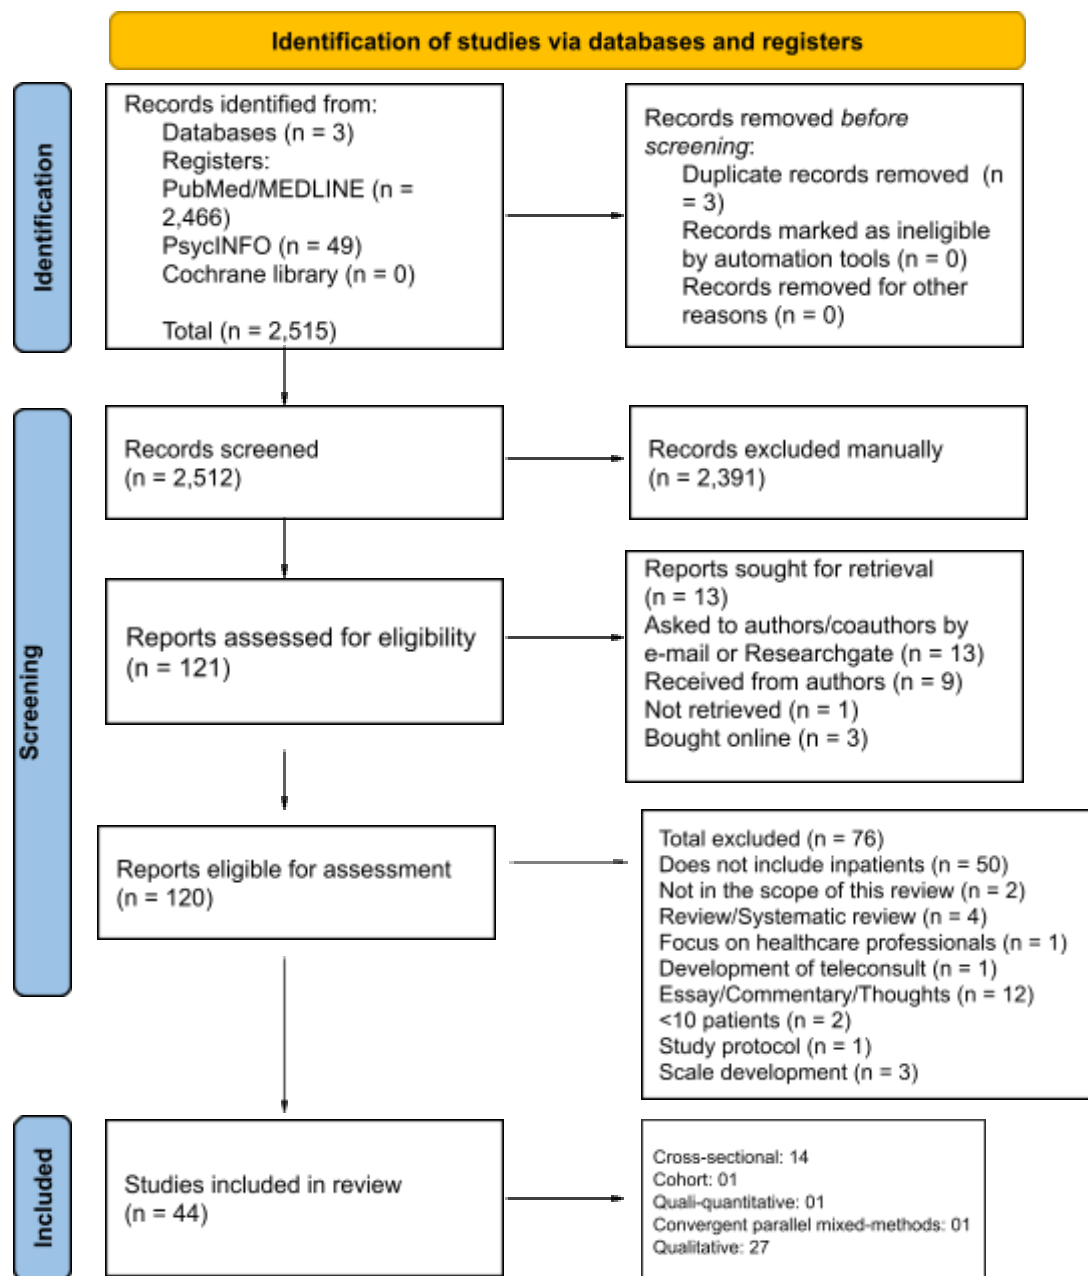

Figure 1: PRISMA flow diagram

| Author (year of publication)                   | Torabizadeh C. et al (2012)                  | Aminu M. et al (2019)                                                                                                                                                       | Horwitz L. I. et al (2010)                                                                                              |
|------------------------------------------------|----------------------------------------------|-----------------------------------------------------------------------------------------------------------------------------------------------------------------------------|-------------------------------------------------------------------------------------------------------------------------|
| Aims                                           | 2                                            | 2                                                                                                                                                                           | 2                                                                                                                       |
| Methods                                        | 2                                            | 2                                                                                                                                                                           | 2                                                                                                                       |
| Design and Methods                             | 2                                            | 2                                                                                                                                                                           | 2                                                                                                                       |
| Recruitment strategy                           | 2                                            | 2                                                                                                                                                                           | 2                                                                                                                       |
| Data collection                                | 2                                            | 2                                                                                                                                                                           | 2                                                                                                                       |
| Bias and Reflexivity                           | 1                                            | 1                                                                                                                                                                           | 1                                                                                                                       |
| Ethical issues                                 | 2                                            | 2                                                                                                                                                                           | 2                                                                                                                       |
| Data analysis                                  | 2                                            | 2                                                                                                                                                                           | 2                                                                                                                       |
| Statement of findings                          | 2                                            | 2                                                                                                                                                                           | 2                                                                                                                       |
| Value and applicability                        | 2                                            | 2                                                                                                                                                                           | 2                                                                                                                       |
| <b>Total</b>                                   | <b>19</b>                                    | <b>19</b>                                                                                                                                                                   | <b>19</b>                                                                                                               |
| Country (year of research and data collection) | Iran (2010/2011)                             | Malawi (2016)                                                                                                                                                               | USA (2007/2008)                                                                                                         |
| Sample size                                    | 20                                           | 73                                                                                                                                                                          | 976                                                                                                                     |
| Type of samples                                | 20 patients (12 women, 08 men; aged 21-78yr) | 64 women (33 in antenatal care; 09 in intrapartum care; 22 in postnatal care); 09 healthcare providers (01 in antenatal care; 02 in intrapartum care; 06 in postnatal care) | 976 postdischarge patients from medical, surgical, gynecology-oncology, neurology, neurosurgery, or Intensive care unit |



## CASP Qualitative Studies Checklist (Critical Appraisal Skills Programme)

|                                                         |                                                                                                                                                                                                                                                                                                                                                                                                                                                                                                                                                                                                                                                           |                                                                                                                                                                                                                                                                                                    |                                                                                                                                                                                                                                                                                                                                                                                                                                                                                                                                                                                          |
|---------------------------------------------------------|-----------------------------------------------------------------------------------------------------------------------------------------------------------------------------------------------------------------------------------------------------------------------------------------------------------------------------------------------------------------------------------------------------------------------------------------------------------------------------------------------------------------------------------------------------------------------------------------------------------------------------------------------------------|----------------------------------------------------------------------------------------------------------------------------------------------------------------------------------------------------------------------------------------------------------------------------------------------------|------------------------------------------------------------------------------------------------------------------------------------------------------------------------------------------------------------------------------------------------------------------------------------------------------------------------------------------------------------------------------------------------------------------------------------------------------------------------------------------------------------------------------------------------------------------------------------------|
| <p><b>STRATEGIES/BEHAVIORS/OUTCOMES OF INTEREST</b></p> | <p>To improve ways to reduce devaluation and to promote patients' dignity; to create organizations to promote and to protect patient dignity</p>                                                                                                                                                                                                                                                                                                                                                                                                                                                                                                          | <p>Staff behaviour; Good communication; Consent and decision-making; Privacy and confidentiality</p>                                                                                                                                                                                               | <p>Safety, treatment with respect and dignity, prompt and efficient care, successful exchange of information, environmental control and autonomy, high-quality amenities</p>                                                                                                                                                                                                                                                                                                                                                                                                             |
| <p><b>INTERVENTIONS TO ACHIEVE IMPROVEMENTS</b></p>     | <p>Provide adequate supplies and necessary facilities; environmental sanitation and cleanliness; loudness at night; avoid unpleasant tasks to be done by companions, not allowing companions to get involved in private issues; provide comfort to companions; avoid unnecessary undressing or body exposure, medical or nurse rounds while changing or using bed pans, avoid presence of members of opposite sex, try to provide care by same sex staff, male and female staff should be available on shifts; provide clear, effective and friendly verbal and gestural communication; try to minimize the cultural clash between patients and staff</p> | <p>Staff behaviour that showed commitment and empathy and was non-judgmental; to allow women to express concerns and ask questions, give information, educational talks, counselling sessions; involve women and family in decisions; avoid breach in confidentiality, respect women's privacy</p> | <p>Improve safety (diet, medication administration, patient identification, and equipment); improve staff knowledge and skills; improve cleanliness and environmental control; ethical, respectful, warmth, attentive to privacy and confidentiality, and dignifying staff attitudes; reduce waiting times for admission, transport, discharge, and staff responses to patients' needs; improve provider-patient and provider-provider communication; improve environmental control (noise, cleanliness, smells, pain, interruption, food, smoking, lighting, temperature, humidity)</p> |

|                |                                                                                                                                                                                                                                                                                                                                                                                                                                                                                                                                                                                                                                                                                                                                                                                                                                                                                                                                                                                                                                                                                                                                                                                                   |                                                                                                                                                                                                                                                                                                                                                                                                                                                                                                                                                                                                                                                                                                      |                                                                                                                                                                                                                                                                                                                                                                                                                                |
|----------------|---------------------------------------------------------------------------------------------------------------------------------------------------------------------------------------------------------------------------------------------------------------------------------------------------------------------------------------------------------------------------------------------------------------------------------------------------------------------------------------------------------------------------------------------------------------------------------------------------------------------------------------------------------------------------------------------------------------------------------------------------------------------------------------------------------------------------------------------------------------------------------------------------------------------------------------------------------------------------------------------------------------------------------------------------------------------------------------------------------------------------------------------------------------------------------------------------|------------------------------------------------------------------------------------------------------------------------------------------------------------------------------------------------------------------------------------------------------------------------------------------------------------------------------------------------------------------------------------------------------------------------------------------------------------------------------------------------------------------------------------------------------------------------------------------------------------------------------------------------------------------------------------------------------|--------------------------------------------------------------------------------------------------------------------------------------------------------------------------------------------------------------------------------------------------------------------------------------------------------------------------------------------------------------------------------------------------------------------------------|
| <b>RESULTS</b> | <p><b>Lack of facilities and equipment:</b> Shortage of facilities and equipment is an obstacle to dignity. <b>Unhygienic conditions:</b> cleaning of their environment was necessary for them to feel dignity. <b>Annoying noise:</b> Crowded wards annoyed the majority of patients preventing peace and tranquillity.</p> <p><b>Compulsory companionship:</b> not only does the patient want to have a companion, the staff expects them to have one. <b>Lack of companion's comfort:</b> They believe that their dignity is not maintained if their companions are not appreciated by the healthcare system. <b>Indecent body exposure:</b> being exposed to others shows disregard for their dignity. <b>Mixed-gender situations:</b> Patients felt uncomfortable when they were left with patients of the opposite sex in rooms or wards. <b>Inadequate verbal and gestural communication:</b> patients were dissatisfied with ineffective communication from healthcare providers. <b>Cultural and social gap:</b> as patients normally have no choice about roommates, some consider that they are not given as much respect as they should be in accordance with their social class.</p> | <p>Important themes that emerged included: the importance of a valued patient-provider relationship as determined by a good attitude and method of communication, the need for more education of women regarding the stages of pregnancy and labour, what happens at each stage and which complications could occur, the importance of a woman's involvement in decision-making, the need to maintain confidentiality when required and the problem of insufficient human resources. Prompt and timely service was considered a priority. Neither women accessing maternity care nor trained healthcare providers providing this care were aware of the respectful maternity care (RMC) Charter.</p> | <p>Six major domains of dissatisfaction were identified: ineptitude, disrespect, waits, ineffective communication, lack of environmental control, and substandard amenities. These domains corresponded to six implicit expectations for quality hospital care: safety, treatment with respect and dignity, minimized wait times, effective communication, control over physical surroundings, and high-quality amenities.</p> |
|----------------|---------------------------------------------------------------------------------------------------------------------------------------------------------------------------------------------------------------------------------------------------------------------------------------------------------------------------------------------------------------------------------------------------------------------------------------------------------------------------------------------------------------------------------------------------------------------------------------------------------------------------------------------------------------------------------------------------------------------------------------------------------------------------------------------------------------------------------------------------------------------------------------------------------------------------------------------------------------------------------------------------------------------------------------------------------------------------------------------------------------------------------------------------------------------------------------------------|------------------------------------------------------------------------------------------------------------------------------------------------------------------------------------------------------------------------------------------------------------------------------------------------------------------------------------------------------------------------------------------------------------------------------------------------------------------------------------------------------------------------------------------------------------------------------------------------------------------------------------------------------------------------------------------------------|--------------------------------------------------------------------------------------------------------------------------------------------------------------------------------------------------------------------------------------------------------------------------------------------------------------------------------------------------------------------------------------------------------------------------------|

|    |  |  |  |  |
|----|--|--|--|--|
| 1  |  |  |  |  |
| 2  |  |  |  |  |
| 3  |  |  |  |  |
| 4  |  |  |  |  |
| 5  |  |  |  |  |
| 6  |  |  |  |  |
| 7  |  |  |  |  |
| 8  |  |  |  |  |
| 9  |  |  |  |  |
| 10 |  |  |  |  |
| 11 |  |  |  |  |
| 12 |  |  |  |  |
| 13 |  |  |  |  |
| 14 |  |  |  |  |
| 15 |  |  |  |  |
| 16 |  |  |  |  |
| 17 |  |  |  |  |
| 18 |  |  |  |  |
| 19 |  |  |  |  |
| 20 |  |  |  |  |
| 21 |  |  |  |  |
| 22 |  |  |  |  |
| 23 |  |  |  |  |
| 24 |  |  |  |  |
| 25 |  |  |  |  |
| 26 |  |  |  |  |
| 27 |  |  |  |  |
| 28 |  |  |  |  |
| 29 |  |  |  |  |
| 30 |  |  |  |  |
| 31 |  |  |  |  |
| 32 |  |  |  |  |
| 33 |  |  |  |  |
| 34 |  |  |  |  |
| 35 |  |  |  |  |
| 36 |  |  |  |  |
| 37 |  |  |  |  |
| 38 |  |  |  |  |
| 39 |  |  |  |  |
| 40 |  |  |  |  |
| 41 |  |  |  |  |
| 42 |  |  |  |  |
| 43 |  |  |  |  |
| 44 |  |  |  |  |
| 45 |  |  |  |  |
| 46 |  |  |  |  |
| 47 |  |  |  |  |
| 48 |  |  |  |  |
| 49 |  |  |  |  |
| 50 |  |  |  |  |
| 51 |  |  |  |  |
| 52 |  |  |  |  |
| 53 |  |  |  |  |
| 54 |  |  |  |  |
| 55 |  |  |  |  |
| 56 |  |  |  |  |
| 57 |  |  |  |  |
| 58 |  |  |  |  |
| 59 |  |  |  |  |
| 60 |  |  |  |  |

|                                                       |                                                     |                                                                                                                                                                       |                                                                                                                                                                                                                                                                                                                                                                                                                                                                                 |
|-------------------------------------------------------|-----------------------------------------------------|-----------------------------------------------------------------------------------------------------------------------------------------------------------------------|---------------------------------------------------------------------------------------------------------------------------------------------------------------------------------------------------------------------------------------------------------------------------------------------------------------------------------------------------------------------------------------------------------------------------------------------------------------------------------|
| <b>LIMITATIONS</b>                                    | Small sample, limited to a single geographic region | Due to differences in cultural practices and beliefs, perceptions and experiences of those in more rural and/or more traditional areas would need further exploration | Patients' perceptions were not compared to chart data; Caregivers were allowed to participate in lieu of patients, which may have reduced identification of some dissatisfying events; patients who did not speak English or Spanish were excluded and could have different experiences; it did not explore dissatisfaction in detail; patients may have been reluctant to report dissatisfaction to a member of hospital staff; there may have been other dissatisfying events |
| <b>Author (year of publication)</b>                   | <b>Khresheh R. et al (2019) (a)</b>                 | <b>Pupulim J. S. L. et al (2012)</b>                                                                                                                                  | <b>Pomerantz S. C. et al (2006) (a)</b>                                                                                                                                                                                                                                                                                                                                                                                                                                         |
| <b>Aims</b>                                           | 2                                                   | 2                                                                                                                                                                     | 2                                                                                                                                                                                                                                                                                                                                                                                                                                                                               |
| <b>Methods</b>                                        | 2                                                   | 2                                                                                                                                                                     | 2                                                                                                                                                                                                                                                                                                                                                                                                                                                                               |
| <b>Design and Methods</b>                             | 1                                                   | 2                                                                                                                                                                     | 2                                                                                                                                                                                                                                                                                                                                                                                                                                                                               |
| <b>Recruitment strategy</b>                           | 2                                                   | 2                                                                                                                                                                     | 1                                                                                                                                                                                                                                                                                                                                                                                                                                                                               |
| <b>Data collection</b>                                | 1                                                   | 2                                                                                                                                                                     | 1                                                                                                                                                                                                                                                                                                                                                                                                                                                                               |
| <b>Bias and Reflexivity</b>                           | 1                                                   | 1                                                                                                                                                                     | 1                                                                                                                                                                                                                                                                                                                                                                                                                                                                               |
| <b>Ethical issues</b>                                 | 2                                                   | 2                                                                                                                                                                     | 2                                                                                                                                                                                                                                                                                                                                                                                                                                                                               |
| <b>Data analysis</b>                                  | 2                                                   | 1                                                                                                                                                                     | 2                                                                                                                                                                                                                                                                                                                                                                                                                                                                               |
| <b>Statement of findings</b>                          | 2                                                   | 1                                                                                                                                                                     | 1                                                                                                                                                                                                                                                                                                                                                                                                                                                                               |
| <b>Value and applicability</b>                        | 2                                                   | 2                                                                                                                                                                     | 2                                                                                                                                                                                                                                                                                                                                                                                                                                                                               |
| <b>Total</b>                                          | <b>17</b>                                           | <b>17</b>                                                                                                                                                             | <b>16</b>                                                                                                                                                                                                                                                                                                                                                                                                                                                                       |
| <b>Country (year of research and data collection)</b> | Jordan (?)                                          | Brazil (2007)                                                                                                                                                         | USA (?)                                                                                                                                                                                                                                                                                                                                                                                                                                                                         |
| <b>Sample size</b>                                    | 21                                                  | 34                                                                                                                                                                    | 179                                                                                                                                                                                                                                                                                                                                                                                                                                                                             |

## CASP Qualitative Studies Checklist (Critical Appraisal Skills Programme)

|                                           |                                                                                                                                                                                                                                                                                        |                                                                                                                                                                                                                                                                                                                                                                                                                                                                                                                                                                  |                                                                                                                                                                                                                                    |
|-------------------------------------------|----------------------------------------------------------------------------------------------------------------------------------------------------------------------------------------------------------------------------------------------------------------------------------------|------------------------------------------------------------------------------------------------------------------------------------------------------------------------------------------------------------------------------------------------------------------------------------------------------------------------------------------------------------------------------------------------------------------------------------------------------------------------------------------------------------------------------------------------------------------|------------------------------------------------------------------------------------------------------------------------------------------------------------------------------------------------------------------------------------|
| Type of samples                           | 21 postpartum inpatients                                                                                                                                                                                                                                                               | 34 (15 male and 19 female inpatients)                                                                                                                                                                                                                                                                                                                                                                                                                                                                                                                            | 179 inpatients                                                                                                                                                                                                                     |
| STRATEGIES/BEHAVIORS/OUTCOMES OF INTEREST | To improve women's feelings during childbirth (feeling frightened and losing control over birth process, feeling disrespected by staff, being treated as ignorant and feeling humiliated)                                                                                              | 1) To see the patient as a person, as a human being; 2) to respect patients' autonomy, to minimize feelings of objectification; 3) to respect the need for a place of their own                                                                                                                                                                                                                                                                                                                                                                                  | To assess the patient's willingness to have religious visits, to obtain consent to list a patient's religion to clergy; to assess the patient's sense of privacy violation                                                         |
| INTERVENTIONS TO ACHIEVE IMPROVEMENTS     | To be attentive and available to women; to avoid unnecessary exposure of genitals; to avoid examination by different staff; to help changing position; to assist with walking to the bathroom; not leaving women alone; to help reducing pain; adoption of respectful manners by staff | 1) To respect patients' feelings, reactions, and privacy, to care for and to treat them well; maintenance of dignity and privacy are seen as markers of a good quality of assistance; to respect patients' self-determination; 2) to ask permission to examine, to touch the patients' body or to perform any procedure, to allow patients' decision about when to be touched, to give choices; 3) to allow seclusion and tranquility, an attempt to preserve and rescue individuality, to respect privacy when using the bathroom, to guarantee confidentiality | To respect patient's rights and desires; to respect patient privacy; not to address a patient's religion without consent; to ask for patient's consent to allow religious visits; no to list a patient's religion unless consented |

|                                                                                                                                                                                                                                         |                                                       |                                                                                                                                                                                                                                                                                                                                                                                                                                                                                                                                                                                                                                                                                                    |                                                                                                                                                                                                                                                                                                                                                                                                                                                                                                                                              |                                                                                                                                                                                                                                                                                                                                                                                                                                                                                                                                                                                                                                                                                                                                                                                                                                                                                                                                                                |
|-----------------------------------------------------------------------------------------------------------------------------------------------------------------------------------------------------------------------------------------|-------------------------------------------------------|----------------------------------------------------------------------------------------------------------------------------------------------------------------------------------------------------------------------------------------------------------------------------------------------------------------------------------------------------------------------------------------------------------------------------------------------------------------------------------------------------------------------------------------------------------------------------------------------------------------------------------------------------------------------------------------------------|----------------------------------------------------------------------------------------------------------------------------------------------------------------------------------------------------------------------------------------------------------------------------------------------------------------------------------------------------------------------------------------------------------------------------------------------------------------------------------------------------------------------------------------------|----------------------------------------------------------------------------------------------------------------------------------------------------------------------------------------------------------------------------------------------------------------------------------------------------------------------------------------------------------------------------------------------------------------------------------------------------------------------------------------------------------------------------------------------------------------------------------------------------------------------------------------------------------------------------------------------------------------------------------------------------------------------------------------------------------------------------------------------------------------------------------------------------------------------------------------------------------------|
| <p>1<br/>2<br/>3<br/>4<br/>5<br/>6<br/>7<br/>8<br/>9<br/>10<br/>11<br/>12<br/>13<br/>14<br/>15<br/>16<br/>17<br/>18<br/>19<br/>20<br/>21<br/>22<br/>23<br/>24<br/>25<br/>26<br/>27<br/>28<br/>29<br/>30<br/>31<br/>32<br/>33<br/>34</p> | <p style="text-align: center;"><b>RESULTS</b></p>     | <p>Three main themes were identified: (1) Women's feelings during childbirth: they felt frightened, humiliated, ignored, and disrespected. Negative actions in term of tangible or physical non-caring behaviours and emotional behaviours were reported. (2) Women's perceptions of the caring behaviours of midwives during childbirth: women had negative experiences during childbirth, they reported disrespectful manners and physical and empathetic abandonment by midwives during childbirth. (3) Women's preferred caring behaviours: women wanted the midwives to listen to what they say, to demonstrate respect for them, and be truly 'present' for women when they needed them.</p> | <p>The subjects pointed out behavioral factors, which contribute or not for the protection and maintenance of the privacy in the hospital, highlighting respect as the most important aspect, followed by personal control over situations that violate privacy. Patients believe that privacy is linked to dignity and respect, depends on the demarcation of the personal/territorial space and the autonomy's security; and that these concepts and attitudes are connected and essential to protect privacy in the hospital context.</p> | <p>Most respondents were women, had a high-school education or less and almost half had not been admitted to hospital previously, were part of an organised religion and described themselves as somewhat or very religious, would not want to be listed by religion and did not think hospitals should give lists to the clergy without their consent. In all, 84% would welcome a visit by their own clergy even if it were triggered by the list. Only 47% thought their sense of privacy would be violated by the hospital disclosing their name, whereas most thought disclosure violated patients' privacy rights; of those who wanted their name listed by religion, 17% thought their sense of privacy would be violated by the hospital disclosing their admission and religion to clergy without their permission and 35% thought the hospital giving clergy the list of names without permission was a violation of patients' rights to privacy</p> |
| <p>35<br/>36<br/>37<br/>38<br/>39<br/>40<br/>41<br/>42<br/>43<br/>44<br/>45<br/>46<br/>47<br/>48<br/>49</p>                                                                                                                             | <p style="text-align: center;"><b>LIMITATIONS</b></p> | <p>Only one hospital, cannot reflect the perceptions of women all over Jordan; did not include women who had emergency caesarean birth; women who did not participate may have different experiences, did not cite data collection time frame</p>                                                                                                                                                                                                                                                                                                                                                                                                                                                  | <p>Patients' perceptions may vary among different regions, and cultures</p>                                                                                                                                                                                                                                                                                                                                                                                                                                                                  | <p>The sample may not be representative of the patients admitted to the hospital, as those who consented to be interviewed may be biased towards those who are more religious and, therefore, more interested in this issue; key questions regarding privacy rights were asked at the end of a long interview. It is not clear whether fatigue influenced those responses</p>                                                                                                                                                                                                                                                                                                                                                                                                                                                                                                                                                                                  |

| Dzomeku V.M. et al (2017)        | Wei H. et al (2019)                           | Widäng I et al (2003)                                           | Haskins L. et al (2019)             |
|----------------------------------|-----------------------------------------------|-----------------------------------------------------------------|-------------------------------------|
| 2                                | 2                                             | 2                                                               | 2                                   |
| 2                                | 2                                             | 2                                                               | 2                                   |
| 2                                | 2                                             | 2                                                               | 2                                   |
| 2                                | 2                                             | 2                                                               | 1                                   |
| 2                                | 2                                             | 2                                                               | 2                                   |
| 1                                | 1                                             | 1                                                               | 1                                   |
| 2                                | 2                                             | 2                                                               | 2                                   |
| 2                                | 2                                             | 2                                                               | 2                                   |
| 2                                | 2                                             | 2                                                               | 2                                   |
| 2                                | 2                                             | 2                                                               | 2                                   |
| 19                               | 19                                            | 19                                                              | 18                                  |
| Ghana (2014-2015)                | China (2015-2017)                             | Sweden (2000-2001)                                              | South Africa (2015-2016)            |
| 56                               | 127                                           | 17                                                              | 44                                  |
| 56 antenatal and postnatal women | 127 (49.6% males, 45.7% females, 4.7% unsure) | 17 patients (10 in the surgical ward and 7 in the medical ward) | 24 mothers, 20 healthcare providers |

|                                                                                                                                                                                                                                                                                                                                                                                                                                 |                                                                                                                                                                                                                                                                                                                                                                                                                                                                       |                                                                                                                                                                                                                                                                                                                                                                                                                                                                                                                                                                                                                                                                               |                                                                                                                                                                                                                                                                                                                                                                                                                                                                   |
|---------------------------------------------------------------------------------------------------------------------------------------------------------------------------------------------------------------------------------------------------------------------------------------------------------------------------------------------------------------------------------------------------------------------------------|-----------------------------------------------------------------------------------------------------------------------------------------------------------------------------------------------------------------------------------------------------------------------------------------------------------------------------------------------------------------------------------------------------------------------------------------------------------------------|-------------------------------------------------------------------------------------------------------------------------------------------------------------------------------------------------------------------------------------------------------------------------------------------------------------------------------------------------------------------------------------------------------------------------------------------------------------------------------------------------------------------------------------------------------------------------------------------------------------------------------------------------------------------------------|-------------------------------------------------------------------------------------------------------------------------------------------------------------------------------------------------------------------------------------------------------------------------------------------------------------------------------------------------------------------------------------------------------------------------------------------------------------------|
| <p>Disrespectful care; inadequate communication and involvement in decision-making; experiences of empathetic support; experiences of continuous labour support and attention</p>                                                                                                                                                                                                                                               | <p>Uncompassionate attitudes, unprofessional communication, disrespect of patients rights, unsatisfactory quality of nursing care</p>                                                                                                                                                                                                                                                                                                                                 | <p><b>Self-respect</b> (having control over yourself and the situation; having the courage to set boundaries; being alone; having self-belief); <b>Dignity</b> (being seen as a whole person; being respected; being seen as trustworthy); <b>Confidence</b> (keeping information confidential; trusting the professionals; having a balance between one's own desires and those of others; participating; being free)</p>                                                                                                                                                                                                                                                    | <p>Provide timely care; communicate clearly, friendly and respectfully; to stimulate women to participate in care</p>                                                                                                                                                                                                                                                                                                                                             |
| <p>Ability to understand life experiences; demonstration of concern and empathy; to be with mothers throughout their labour period; to have spouses and relatives with mothers; emotional and comforting measures, information and advocacy; improve communication, involve patients and families in decision-making; to institute quality assurance methods; education of healthcare professionals on patient-centred care</p> | <p>To be constructive and helpful; to show respect for humanity and ethics; to maintain a positive and compassionate attitude and respect patient humanity; to be fair to all patients, respect human dignity, and explain information understandably and respectfully; to fully inform patients about his/her treatment plans and the medications and procedures given and undergoing; to be competent and empathetic in nursing care; improve nursing education</p> | <p>Allow patients to gain control; to tell a caregiver that one's feeling at risk of having his/her integrity violated; to allow patients to be alone, in privacy; to allow the patient to be responsible for himself; to see patients as a whole person; not to objectify patients; to respect patients' wishes and follow their instructions; to respect confidentiality; to show a high level of knowledge, be involved, have good communication skills and show empathy; to balance demands from patients with those from health care; to involve patients in the decision-making process; recognise patients' independence and allow them to take care of themselves</p> | <p>To be attentive to patients needs; to be friendly, to provide clear information, to clear mothers' doubts, to listen to mothers' concerns; to include mothers in decision-making process; to ask for consent; to involve women by allowing them to ask questions, to care for their babies, to give clear instructions about infections and protocols for infectious diseases in neonatal units; to stimulate women to be actively caring for their babies</p> |

|                                                                                                                                                                                                                                                                                                                                                                                                                                                                                                                                                                                                                                                                                                             |                                                                                                                                                                                                                                                                                                                                                                                                                                                                                                                                                                                                                                                                                                                                                                                                                                                                                                                                                                                                                                                                                                                 |                                                                                                                                                                                                                                                                                                                                                                                                                                                                                                                                                                                                                                                                                                                                                                                                                                                                                                                                                                                                                                                |                                                                                                                                                                                                                                                                                                                                                                                                                                                                                                                                                                                                                                                                                                                 |
|-------------------------------------------------------------------------------------------------------------------------------------------------------------------------------------------------------------------------------------------------------------------------------------------------------------------------------------------------------------------------------------------------------------------------------------------------------------------------------------------------------------------------------------------------------------------------------------------------------------------------------------------------------------------------------------------------------------|-----------------------------------------------------------------------------------------------------------------------------------------------------------------------------------------------------------------------------------------------------------------------------------------------------------------------------------------------------------------------------------------------------------------------------------------------------------------------------------------------------------------------------------------------------------------------------------------------------------------------------------------------------------------------------------------------------------------------------------------------------------------------------------------------------------------------------------------------------------------------------------------------------------------------------------------------------------------------------------------------------------------------------------------------------------------------------------------------------------------|------------------------------------------------------------------------------------------------------------------------------------------------------------------------------------------------------------------------------------------------------------------------------------------------------------------------------------------------------------------------------------------------------------------------------------------------------------------------------------------------------------------------------------------------------------------------------------------------------------------------------------------------------------------------------------------------------------------------------------------------------------------------------------------------------------------------------------------------------------------------------------------------------------------------------------------------------------------------------------------------------------------------------------------------|-----------------------------------------------------------------------------------------------------------------------------------------------------------------------------------------------------------------------------------------------------------------------------------------------------------------------------------------------------------------------------------------------------------------------------------------------------------------------------------------------------------------------------------------------------------------------------------------------------------------------------------------------------------------------------------------------------------------|
| <p>1<br/>2<br/>3<br/>4 Mothers had both<br/>5 encouraging and<br/>6 discouraging<br/>7 experiences during<br/>8 care, which<br/>9 influenced their<br/>10 willingness to seek<br/>11 assisted health<br/>12 care during<br/>13 childbirth in the<br/>14 future. Participants<br/>15 who had<br/>16 experiences of<br/>17 empathetic support<br/>18 and continuous<br/>19 labour support and<br/>20 attention reported<br/>21 these to be<br/>22 encouraging. Other<br/>23 participants<br/>24 reported<br/>25 discouraging<br/>26 experiences such<br/>27 as disrespectful<br/>28 care and<br/>29 inadequate<br/>30 communication<br/>31 and involvement in<br/>32 care decisions.<br/>33<br/>34<br/>35</p> | <p>Uncompassionate attitudes were categorized when patients/families did not feel that nurses showed empathy or concerns for patients, or when patients/families felt that nurses treated them in a way that was negative, destructive, or aggressive; nurses' attitude and demeanor directly affect patients' perceptions of the quality of patient care and the kindness—benevolence—of the organization; unprofessional communication was characterized when patients/families perceived that nurses lacked the use of proper language, tone, choice of words, or facial/body expressions when talking to patients and families; patients felt that being able to understand a procedure and make an informed decision was a critical patient right; when incongruency occurs between patients' expectations for care and the care that they receive, patients are dissatisfied, and patients' complaints may occur; most of the times patients' complaints are not triggered by their perceptions of substandard care, but by nurses' uncompassionate attitudes or unprofessional communication skills.</p> | <p>To develop emotion-focused coping-strategies, which might transform negative events into positive ones, minimizing the risk of perceiving events as violating, problem-focused coping-strategies, like creating alternative solutions or considering alternatives in terms of their costs and benefits, can be found in different actions (seeking more information and support from caregivers or other patients or selecting the caregiver who best suits the patient); to allow withdrawing in a physical as well as psychological sense; to treat the patients in a way that he can feel his integrity is being preserved, to respect him a whole person; to improve mutual confidence between patient and caregiver, to maintain a high level of confidentiality, increasing patients' trust in caregivers; to allow patients to set boundaries during diagnostic or therapeutic procedures to balance patients' and caregivers desires; to allow patients to participate in decision-making process, to allow patients to be free</p> | <p>The importance of information sharing between healthcare workers (HWs) and mothers of babies, contrasting the positive communication reported by many mothers which led to them feeling empowered and participating actively in the care of their babies, with incidents of poor communication; poor communication, rudeness and disrespectful behavior of HWs was frequently described by mothers, and led to mothers feeling anxious, unwilling to ask questions and excluded from their baby's care; poor communication and misunderstandings led to serious mismanagement of babies with HWs delaying or withholding care, or to mothers putting their babies at risk by not following instructions.</p> |
|-------------------------------------------------------------------------------------------------------------------------------------------------------------------------------------------------------------------------------------------------------------------------------------------------------------------------------------------------------------------------------------------------------------------------------------------------------------------------------------------------------------------------------------------------------------------------------------------------------------------------------------------------------------------------------------------------------------|-----------------------------------------------------------------------------------------------------------------------------------------------------------------------------------------------------------------------------------------------------------------------------------------------------------------------------------------------------------------------------------------------------------------------------------------------------------------------------------------------------------------------------------------------------------------------------------------------------------------------------------------------------------------------------------------------------------------------------------------------------------------------------------------------------------------------------------------------------------------------------------------------------------------------------------------------------------------------------------------------------------------------------------------------------------------------------------------------------------------|------------------------------------------------------------------------------------------------------------------------------------------------------------------------------------------------------------------------------------------------------------------------------------------------------------------------------------------------------------------------------------------------------------------------------------------------------------------------------------------------------------------------------------------------------------------------------------------------------------------------------------------------------------------------------------------------------------------------------------------------------------------------------------------------------------------------------------------------------------------------------------------------------------------------------------------------------------------------------------------------------------------------------------------------|-----------------------------------------------------------------------------------------------------------------------------------------------------------------------------------------------------------------------------------------------------------------------------------------------------------------------------------------------------------------------------------------------------------------------------------------------------------------------------------------------------------------------------------------------------------------------------------------------------------------------------------------------------------------------------------------------------------------|



|    |                        |                                         |                                |                                |
|----|------------------------|-----------------------------------------|--------------------------------|--------------------------------|
| 1  |                        |                                         |                                |                                |
| 2  |                        |                                         |                                |                                |
| 3  |                        |                                         |                                |                                |
| 4  |                        |                                         |                                |                                |
| 5  |                        |                                         |                                |                                |
| 6  |                        |                                         |                                |                                |
| 7  |                        |                                         |                                | Exclusion of very small        |
| 8  |                        |                                         |                                | hospitals for logistic         |
| 9  |                        |                                         |                                | reasons; did not conduct       |
| 10 |                        |                                         |                                | observation during evening     |
| 11 |                        |                                         |                                | or night shifts or observe     |
| 12 |                        |                                         |                                | healthcare workers on duty     |
| 13 |                        |                                         |                                | after hours; fathers were      |
| 14 | Small sample,          | Limited understanding of patients'      | Only men were included, small  | not included; the presence     |
| 15 | limited geographic     | complaints in depth; limited geographic | sample                         | of the observer may have       |
| 16 | area                   | area                                    |                                | changed the behavior of the    |
| 17 |                        |                                         |                                | participants; mothers may      |
| 18 |                        |                                         |                                | have avoided to criticise the  |
| 19 |                        |                                         |                                | care received while their      |
| 20 |                        |                                         |                                | babies were still admitted in  |
| 21 |                        |                                         |                                | the unit; healthcare workers   |
| 22 |                        |                                         |                                | may not have felt able to      |
| 23 |                        |                                         |                                | speak about colleagues         |
| 24 |                        |                                         |                                | and managers                   |
| 25 |                        |                                         |                                |                                |
| 26 |                        |                                         |                                |                                |
| 27 |                        |                                         |                                |                                |
| 28 |                        |                                         |                                |                                |
| 29 |                        |                                         |                                |                                |
| 30 | <b>Mohammadi E. et</b> | <b>Thommesen T. et al (2020)</b>        | <b>Tsai Y. F. et al (2020)</b> | <b>Gebremichael M.W. et al</b> |
| 31 | <b>al (2017)</b>       |                                         |                                | <b>(2018) (a)</b>              |
| 32 |                        |                                         |                                |                                |
| 33 | 2                      | 2                                       | 1                              | 2                              |
| 34 | 2                      | 2                                       | 1                              | 1                              |
| 35 | 2                      | 2                                       | 1                              | 1                              |
| 36 | 2                      | 1                                       | 2                              | 1                              |
| 37 | 2                      | 2                                       | 2                              | 1                              |
| 38 | 1                      | 1                                       | 1                              | 1                              |
| 39 | 2                      | 1                                       | 2                              | 2                              |
| 40 | 1                      | 2                                       | 1                              | 2                              |
| 41 | 1                      | 1                                       | 2                              | 2                              |
| 42 | 1                      | 2                                       | 2                              | 2                              |
| 43 | 16                     | 16                                      | 15                             | 15                             |
| 44 |                        |                                         |                                |                                |
| 45 | Iran (2009-2012)       | Afghanistan (2017)                      | Indonesia (2016-2017)          | Ethiopia (?)                   |
| 46 |                        |                                         |                                |                                |
| 47 | 29                     | 39                                      | 75                             | 62                             |
| 48 |                        |                                         |                                |                                |
| 49 |                        |                                         |                                |                                |
| 50 |                        |                                         |                                |                                |
| 51 |                        |                                         |                                |                                |
| 52 |                        |                                         |                                |                                |
| 53 |                        |                                         |                                |                                |
| 54 |                        |                                         |                                |                                |
| 55 |                        |                                         |                                |                                |
| 56 |                        |                                         |                                |                                |
| 57 |                        |                                         |                                |                                |
| 58 |                        |                                         |                                |                                |
| 59 |                        |                                         |                                |                                |
| 60 |                        |                                         |                                |                                |

|                                                                                                                                                                                                                                                                              |                                                                                                                                                                                                                                                                                                                                                                                                                                                                                                                                                                                                                                                                                   |                                                                                                                                                                                                                                                                                       |                                                                                                                                                                                                                                                                                                                                                                                                                                     |
|------------------------------------------------------------------------------------------------------------------------------------------------------------------------------------------------------------------------------------------------------------------------------|-----------------------------------------------------------------------------------------------------------------------------------------------------------------------------------------------------------------------------------------------------------------------------------------------------------------------------------------------------------------------------------------------------------------------------------------------------------------------------------------------------------------------------------------------------------------------------------------------------------------------------------------------------------------------------------|---------------------------------------------------------------------------------------------------------------------------------------------------------------------------------------------------------------------------------------------------------------------------------------|-------------------------------------------------------------------------------------------------------------------------------------------------------------------------------------------------------------------------------------------------------------------------------------------------------------------------------------------------------------------------------------------------------------------------------------|
| <p>18 patients, 11 members of their families</p>                                                                                                                                                                                                                             | <p>25 postpartum patients, 11 mothers-in-law, 3 community midwives</p>                                                                                                                                                                                                                                                                                                                                                                                                                                                                                                                                                                                                            | <p>35 inpatients (18 male, 17 female); 40 registered nurses (17 male, 23 female)</p>                                                                                                                                                                                                  | <p>62 women post-delivery</p>                                                                                                                                                                                                                                                                                                                                                                                                       |
| <p>Deprivation of the caregiver's presence; delay/lack of appropriate responses to the needs; receiving mechanical care (superficiality, lack of affection, failure to understand the situation); being disrespected (humility, aggression)</p>                              | <p>Decisions on where to give birth, access to health facilities, and receiving and evaluating midwifery care</p>                                                                                                                                                                                                                                                                                                                                                                                                                                                                                                                                                                 | <p>Discrimination, negligence, impoliteness, dismissal, inattentiveness</p>                                                                                                                                                                                                           | <p>To be friendly, polite, avoid disrespect, to avoid abandonment, to avoid junior providers to perform unsupervised, to treat as adult, to allow women to have privacy, to avoid worries about pregnancy outcomes, to avoid unnecessary vaginal examinations, to avoid shortages, avoid abandonment and neglect, cultural respect, avoid dirt</p>                                                                                  |
| <p>Provision of timely and appropriate needs, provide genuine care (knowledge, attention, emotion, and understanding), know the patient well, alleviate suffering, find appropriate ways to communicate, to show compassion, provide emotional support, to be respectful</p> | <p>Education to women, information about pregnancy and birth; improve access to basic and emergency obstetric care; integrate cultural sensitivity and respect for privacy and intimacy into health professionals' education; environmental control (hygiene and cleanliness); respect for privacy and intimacy; promote early breastfeeding; promote communication between women and midwives; provide familiar professional midwife care; provision of cheap equipment (e.g. curtains), ensuring a minimum level of comfort, privacy and dignity; provide resources (drugs and equipment) and human resources; train professionals on empathic and respectful communication</p> | <p>Improve responsiveness time; improve communication skills in order to provide compassionate care; avoid harm to a patient during treatments and interventions; encourage exchange of nurse-patient information; treat patients equally/do not discriminate; show attentiveness</p> | <p>To be supportive, friendly, polite, to stay for patients needs, to communicate results of examinations, to avoid infantilization, to respect privacy, to give clear information, to examine in private and not that frequently, to avoid shortages of consumable materials, staff and water, to avoid verbal and physical abuse, to be attentive, to allow companionship, to respect cultural practices, improve cleanliness</p> |

|                                                                                                                                                                                                                                                                                                                                                                                                              |                                                                                                                                                                                                                                                                                                                                                                                                                                                                                                                                                                                                                                                                                                                                                                                                                                                                                                                                                                                                                                                                                                                                                                                            |                                                                                                                                                                                                                                                                                                                                                                                                                                                                                                                                                                                                                                                                                                                                                                                                                                                                                                                                                                                                                                              |                                                                                                                                                                                                                                                                                                                                                                                                                                                                                                                                                                                      |
|--------------------------------------------------------------------------------------------------------------------------------------------------------------------------------------------------------------------------------------------------------------------------------------------------------------------------------------------------------------------------------------------------------------|--------------------------------------------------------------------------------------------------------------------------------------------------------------------------------------------------------------------------------------------------------------------------------------------------------------------------------------------------------------------------------------------------------------------------------------------------------------------------------------------------------------------------------------------------------------------------------------------------------------------------------------------------------------------------------------------------------------------------------------------------------------------------------------------------------------------------------------------------------------------------------------------------------------------------------------------------------------------------------------------------------------------------------------------------------------------------------------------------------------------------------------------------------------------------------------------|----------------------------------------------------------------------------------------------------------------------------------------------------------------------------------------------------------------------------------------------------------------------------------------------------------------------------------------------------------------------------------------------------------------------------------------------------------------------------------------------------------------------------------------------------------------------------------------------------------------------------------------------------------------------------------------------------------------------------------------------------------------------------------------------------------------------------------------------------------------------------------------------------------------------------------------------------------------------------------------------------------------------------------------------|--------------------------------------------------------------------------------------------------------------------------------------------------------------------------------------------------------------------------------------------------------------------------------------------------------------------------------------------------------------------------------------------------------------------------------------------------------------------------------------------------------------------------------------------------------------------------------------|
| <p>The patients' rights were violated in a variety of ways. There were three main dimensions to this issue: (a) care recession including deprivation of the caregiver's presence and the delay/lack of needed responses; (b) receiving mechanical care including superficiality, lack of emotion, and failure to understand the situation; and (c) being disrespected including humility and aggression.</p> | <p>Whilst most of the women were aware of the benefits of midwifery care, it turned out that not all of them used such a service; a number of women managed to look after themselves during labour and childbirth, and stated that they did not need or want midwifery care; most of the older informants stated during the focus-group discussions that it is best to give birth at home, and that giving birth in a health facility is a modern practice they did not feel confident with; some women, regardless of their age, felt confident about coping with childbirth on their own; such cultural attitudes may on the one hand reflect resilience, but on the other hand represent barriers to safe childbirth in the event of unexpected problems and emergencies; some women expressed that they would have opted for the clinic but were not allowed to do so by their husbands or in-laws; according to Islamic tradition Afghan women need permission from and accompaniment by a close male family member – a Mahram – in order to seek professional health care and to go to a health facility, husbands and in-laws did not consent to women giving birth in a clinic</p> | <p><b>Similarities of viewpoints between nurses and patients:</b> Negligence: prolonged wait times for care, which they perceived as unresponsive; nurses as being disrespectful, which caused pain and suffering. Impoliteness: use of a loud, high-pitched voice by Indonesian nurses was considered yelling; both nurses and patients interpreted this as impolite and inappropriate; nurses administered treatments roughly and without regard for the discomfort they might be causing the patient. Dismissal: patients were not provided with information or explanations they required. <b>Dissimilarities of viewpoints between nurses and patients:</b> Discrimination: patients perceived they were being treated less than equal to other patients, which threatened their dignity; they worried that being admitted to the hospital and paying with healthcare insurance resulted in a poorer quality of care than for patients able to pay privately. Inattentiveness: perceived by nurses to be disrespectful to patients.</p> | <p>The study participants described disrespect and abuse as serious obstacles to utilization of maternal health services. Women reported experiencing feelings of being infantilized, losing self-control, being overlooked, being informed bad news without proper preparation, repeated examination without being properly communicated/ informed, disallow companions, and left unattended during labor. Facility related issues include women's perception of incompetence of professionals attending delivery, unhygienic facilities, and unavailability of basic supplies.</p> |
| <p>The patterns are dependent on the context in a qualitative research</p>                                                                                                                                                                                                                                                                                                                                   | <p>Main researcher could not run the interviews herself for security reasons; use of local research assistants with limited experience in qualitative research; women in this study could be more in favor of the program than others; data collectors may have been biased in their choice of respondents; details may have been lost in translation from Dari/Pashto into English; female data collectors had issues with transport, security and limited time frame</p>                                                                                                                                                                                                                                                                                                                                                                                                                                                                                                                                                                                                                                                                                                                 | <p>Design of the study; did not employ in-depth interviews for data collection; did not quantify the frequency of disrespectful behaviors</p>                                                                                                                                                                                                                                                                                                                                                                                                                                                                                                                                                                                                                                                                                                                                                                                                                                                                                                | <p>Cannot be generalized, did not cite data collection time frame</p>                                                                                                                                                                                                                                                                                                                                                                                                                                                                                                                |

| Hussein S. A. A. A. et al (2019)                                                                                           | Hernández-Martínez A et al (2019) (a) |
|----------------------------------------------------------------------------------------------------------------------------|---------------------------------------|
| 2                                                                                                                          | 2                                     |
| 2                                                                                                                          | 2                                     |
| 2                                                                                                                          | 2                                     |
| 2                                                                                                                          | 2                                     |
| 2                                                                                                                          | 2                                     |
| 1                                                                                                                          | 1                                     |
| 2                                                                                                                          | 1                                     |
| 2                                                                                                                          | 2                                     |
| 1                                                                                                                          | 2                                     |
| 2                                                                                                                          | 2                                     |
| 2                                                                                                                          | 2                                     |
| 2                                                                                                                          | 2                                     |
| 18                                                                                                                         | 18                                    |
| Jordan and Australia (2017/2018)                                                                                           | Spain (?)                             |
| 27                                                                                                                         | 32                                    |
| 27 Jordanian women (Recent Mothers, RM; Experienced Mothers, EM; Australian Jordanian Mothers, AJM) (12 RM, 08 EM, 07 AJM) | 32 women                              |

|                                                                                                                                                                                                                                                                                                                                                                                                                                                                  |                                                                                                                                                                                                                                                                                                                                                                                                                                                                               |
|------------------------------------------------------------------------------------------------------------------------------------------------------------------------------------------------------------------------------------------------------------------------------------------------------------------------------------------------------------------------------------------------------------------------------------------------------------------|-------------------------------------------------------------------------------------------------------------------------------------------------------------------------------------------------------------------------------------------------------------------------------------------------------------------------------------------------------------------------------------------------------------------------------------------------------------------------------|
| <p>To improve privacy and dignity</p>                                                                                                                                                                                                                                                                                                                                                                                                                            | <p>Birth plan compliance, obstetric problems, mother-infant bond, emotional wounds, perinatal experiences</p>                                                                                                                                                                                                                                                                                                                                                                 |
| <p>One professional to examine patients during labor and birth; female professionals, especially during vaginal examination; to address women's needs for respect and privacy; not having doors opened directly into the birthing room; using physical barriers when the door is opened; to cover with a simple sheet; shielding women from visitors; limiting the number of attendants present; train professionals to protect and maintain women's privacy</p> | <p>Give explanation and medical reasons why; introduce oneself, look patients in the eyes, explain the procedures; make sure women are properly informed; wait the correct time for medication to take full effect; reinforce breastfeeding over artificial feeding; pregnancy and breastfeeding support groups; focus on giving more information on the processes; focus on training women, their partners and close family; obtain consent, be attentive and supportive</p> |

|                                                                                                                                                                                                                                                                                                                                                                                                                                                                                                                                                                                                                                                                                                                                                                                                                                                                                                                                                                                                                                                                                                                                          |                                                                                                                                                                                                                                                                                                                                                                                                                                                                                                                                                                                                                                                                                                                                               |
|------------------------------------------------------------------------------------------------------------------------------------------------------------------------------------------------------------------------------------------------------------------------------------------------------------------------------------------------------------------------------------------------------------------------------------------------------------------------------------------------------------------------------------------------------------------------------------------------------------------------------------------------------------------------------------------------------------------------------------------------------------------------------------------------------------------------------------------------------------------------------------------------------------------------------------------------------------------------------------------------------------------------------------------------------------------------------------------------------------------------------------------|-----------------------------------------------------------------------------------------------------------------------------------------------------------------------------------------------------------------------------------------------------------------------------------------------------------------------------------------------------------------------------------------------------------------------------------------------------------------------------------------------------------------------------------------------------------------------------------------------------------------------------------------------------------------------------------------------------------------------------------------------|
| <p>1<br/>2<br/>3<br/>4<br/>5<br/>6<br/>7<br/>8 Seeking a birth in a private hospital in<br/>9 Jordan was one of the strategies that<br/>10 women used to gain privacy, although this<br/>11 was not always achieved; women were<br/>12 surprised and distressed that in public<br/>13 hospitals, and at times in private hospitals<br/>14 in Jordan, they were expected to share a<br/>15 room with other women during labour and<br/>16 birth; privacy was afforded when birthing<br/>17 at home; women felt exposed, and<br/>18 embarrassed and complained of not being<br/>19 covered with a sheet; participants were<br/>20 distressed by, and critical of, the number<br/>21 of doctors that came in and out of their<br/>22 rooms, the most distressing part of having<br/>23 to deal with many different health<br/>24 professionals was during vaginal<br/>25 examinations, participants discussed their<br/>26 preference for having a female health<br/>27 professional care for them during labour,<br/>28 and birth, and in particular to perform<br/>29 vaginal examinations.<br/>30<br/>31<br/>32<br/>33<br/>34<br/>35</p> | <p>Data analysis revealed five major themes—"Birth Plan Compliance", "Obstetric Problems", "Mother-Infant Bond", "Emotional Wounds" and "Perinatal Experiences"—and 13 subthemes. The majority of responses mentioned feelings of being un/misinformed by healthcare personnel, being disrespected and objectified, lack of support, and various problems during childbirth and postpartum. Fear, loneliness, traumatic stress, and depression were recurrent themes in participants' responses. As the actions of healthcare personnel can substantially impact a birth experience, the study findings strongly suggest the need for proper policies, procedures, training, and support to minimise negative consequences of childbirth.</p> |
|------------------------------------------------------------------------------------------------------------------------------------------------------------------------------------------------------------------------------------------------------------------------------------------------------------------------------------------------------------------------------------------------------------------------------------------------------------------------------------------------------------------------------------------------------------------------------------------------------------------------------------------------------------------------------------------------------------------------------------------------------------------------------------------------------------------------------------------------------------------------------------------------------------------------------------------------------------------------------------------------------------------------------------------------------------------------------------------------------------------------------------------|-----------------------------------------------------------------------------------------------------------------------------------------------------------------------------------------------------------------------------------------------------------------------------------------------------------------------------------------------------------------------------------------------------------------------------------------------------------------------------------------------------------------------------------------------------------------------------------------------------------------------------------------------------------------------------------------------------------------------------------------------|

|                                                                                                                                                                                                                                                                                                                                                                             |                                                                                                         |
|-----------------------------------------------------------------------------------------------------------------------------------------------------------------------------------------------------------------------------------------------------------------------------------------------------------------------------------------------------------------------------|---------------------------------------------------------------------------------------------------------|
| <p>Study conducted in Irbid (Jordan) and Sydney (Australia) and at the same place, which can not be representative of other women in Jordan; small sample (only 27 Jordanian women); participants self-select, other women may have different stories to tell; participants may not have felt comfortable enough to discuss everything they have experienced or thought</p> | <p>Cannot pinpoint a specific geographic area for future policy recommendations; not generalisable;</p> |
| <p><b>Fleury S. et al (2013) (a)</b></p>                                                                                                                                                                                                                                                                                                                                    | <p><b>Robins C. S. et al (2005)</b></p>                                                                 |
| <p>2</p>                                                                                                                                                                                                                                                                                                                                                                    | <p>2</p>                                                                                                |
| <p>2</p>                                                                                                                                                                                                                                                                                                                                                                    | <p>2</p>                                                                                                |
| <p>2</p>                                                                                                                                                                                                                                                                                                                                                                    | <p>2</p>                                                                                                |
| <p>1</p>                                                                                                                                                                                                                                                                                                                                                                    | <p>1</p>                                                                                                |
| <p>1</p>                                                                                                                                                                                                                                                                                                                                                                    | <p>1</p>                                                                                                |
| <p>1</p>                                                                                                                                                                                                                                                                                                                                                                    | <p>1</p>                                                                                                |
| <p>2</p>                                                                                                                                                                                                                                                                                                                                                                    | <p>1</p>                                                                                                |
| <p>1</p>                                                                                                                                                                                                                                                                                                                                                                    | <p>2</p>                                                                                                |
| <p>1</p>                                                                                                                                                                                                                                                                                                                                                                    | <p>1</p>                                                                                                |
| <p>1</p>                                                                                                                                                                                                                                                                                                                                                                    | <p>1</p>                                                                                                |
| <p><b>14</b></p>                                                                                                                                                                                                                                                                                                                                                            | <p><b>14</b></p>                                                                                        |
| <p>Brazil (?)</p>                                                                                                                                                                                                                                                                                                                                                           | <p>USA (2002-2004)</p>                                                                                  |
| <p>285</p>                                                                                                                                                                                                                                                                                                                                                                  | <p>27</p>                                                                                               |

|                                                                                                                                                                                                    |                                                                                                                                                                                      |
|----------------------------------------------------------------------------------------------------------------------------------------------------------------------------------------------------|--------------------------------------------------------------------------------------------------------------------------------------------------------------------------------------|
| <p>190 users and/or their companions, 90 professionals directly involved in providing health care and 5 hospital administrators</p>                                                                | <p>27 psychiatric patients (11 female, 16 male)</p>                                                                                                                                  |
| <p>Denial, submission, naturalization, individual resistance, collective resistance</p>                                                                                                            | <p>Threat of physical violence and arbitrary nature of the rules; not knowing the consumers as individuals, perceived lack of fairness, experiencing disrespect or embarrassment</p> |
| <p>Not to naturalize the disrespectful and oppressive treatment; not to discriminate; to educate patients to identify discrimination and mistreatment; to resort the mechanism of denouncement</p> | <p>Efforts to reduce the incidence of traumatic and harmful events in psychiatric settings; revise hiring practices; improve staff training; changes to policies and procedures</p>  |



|                                                                                                                                                                                                                                                                                                                                                                                                                                                                                                                                                                                                                                                                                                                                                                                                                                                                                                                                                                                                                                                                                                                                                                                                      |                                                                                                                                                                                                                                                                                                                                                                                                                                                                                                                                                                               |
|------------------------------------------------------------------------------------------------------------------------------------------------------------------------------------------------------------------------------------------------------------------------------------------------------------------------------------------------------------------------------------------------------------------------------------------------------------------------------------------------------------------------------------------------------------------------------------------------------------------------------------------------------------------------------------------------------------------------------------------------------------------------------------------------------------------------------------------------------------------------------------------------------------------------------------------------------------------------------------------------------------------------------------------------------------------------------------------------------------------------------------------------------------------------------------------------------|-------------------------------------------------------------------------------------------------------------------------------------------------------------------------------------------------------------------------------------------------------------------------------------------------------------------------------------------------------------------------------------------------------------------------------------------------------------------------------------------------------------------------------------------------------------------------------|
| <p>Professionals that have less contact with patients tend to be given an even more favorable position; it was not possible to prove the hypothesis that a higher position increases the chances of discriminatory behavior; concerning the institutional culture and management, there is a trivialization of the injustices and rationalization of the inadequate conditions and precariousness present in the public healthcare services; the lack of effective channels for filing grievances and punishing mistreatment and discrimination is made worse by a predominant attitude that perceives any complaint as disrespectful on the part of patients; the absence of clear rules, procedures and norms related to the referral of patients and the selection of those that will be assisted increases the discretionary power of professionals that are not trained for these tasks; the structural aspect of inequality showed the precariousness of the public healthcare services, thus generating a pilgrimage in users to different health units in search of care; the existence of stigmatizing characteristics increases the likelihood of the user being discriminated against</p> | <p>Eighteen of 27 interviewees described harmful incidents that they had witnessed or experienced directly, many of which evoked strong emotional responses by consumers during their narration. Nearly all incidents described were hospital based and were clustered around two sets of themes. The first set related to the hospital setting, including the fear of physical violence and the arbitrary nature of the rules. The second set related to the narrators' interactions with clinical staff, including depersonalization, lack of fairness, and disrespect.</p> |
| <p>Cannot be generalized, limited geographic area, did not cite data collection time frame</p>                                                                                                                                                                                                                                                                                                                                                                                                                                                                                                                                                                                                                                                                                                                                                                                                                                                                                                                                                                                                                                                                                                       | <p>Did not interview staff</p>                                                                                                                                                                                                                                                                                                                                                                                                                                                                                                                                                |

| Hrisos S (2013)                                                                                                                                             | Adolfsson A. et al (2012)                                                                                                                                                                                 |
|-------------------------------------------------------------------------------------------------------------------------------------------------------------|-----------------------------------------------------------------------------------------------------------------------------------------------------------------------------------------------------------|
| 2                                                                                                                                                           | 2                                                                                                                                                                                                         |
| 2                                                                                                                                                           | 2                                                                                                                                                                                                         |
| 1                                                                                                                                                           | 2                                                                                                                                                                                                         |
| 2                                                                                                                                                           | 2                                                                                                                                                                                                         |
| 2                                                                                                                                                           | 2                                                                                                                                                                                                         |
| 2                                                                                                                                                           | 1                                                                                                                                                                                                         |
| 2                                                                                                                                                           | 1                                                                                                                                                                                                         |
| 1                                                                                                                                                           | 1                                                                                                                                                                                                         |
| 2                                                                                                                                                           | 2                                                                                                                                                                                                         |
| 2                                                                                                                                                           | 2                                                                                                                                                                                                         |
| <b>18</b>                                                                                                                                                   | <b>17</b>                                                                                                                                                                                                 |
| England (2010)                                                                                                                                              | Sweden (2007)                                                                                                                                                                                             |
| 59                                                                                                                                                          | 14                                                                                                                                                                                                        |
| 16 patients (10 female, 6 male) and 4 relatives (2 female, 2 male), 39 healthcare staff (9 pharmacists, 11 doctors, 12 nurses and 7 health care assistants) | 14 inpatients, Two lowest priority groups in the Emergency Department who eventually wait for the longest period of time to receive treatment (at Skaraborg area, a district in the Västra Götaland area) |

|                                                                                                                                                                                                                                                                                                                                                                                                                                                                                                                                                                                                                                                                                                                               |                                                                                                                                                                                                                                                                                                                                                                                                                                                                                                                                                                                               |
|-------------------------------------------------------------------------------------------------------------------------------------------------------------------------------------------------------------------------------------------------------------------------------------------------------------------------------------------------------------------------------------------------------------------------------------------------------------------------------------------------------------------------------------------------------------------------------------------------------------------------------------------------------------------------------------------------------------------------------|-----------------------------------------------------------------------------------------------------------------------------------------------------------------------------------------------------------------------------------------------------------------------------------------------------------------------------------------------------------------------------------------------------------------------------------------------------------------------------------------------------------------------------------------------------------------------------------------------|
| <p>1<br/>2<br/>3<br/>4<br/>5<br/>6<br/>7<br/>8<br/>9 Perceived advantages of patient involvement in<br/>10 improving their own safety; Concerns about involving patients in<br/>11 improving their own safety; Risk of damage to the patient-provider<br/>12 relationship; Staff may treat the patient “differently”; Behavioural<br/>13 implications of service-user fears; Behavioural implications of<br/>14 healthcare professional fears<br/>15<br/>16<br/>17<br/>18<br/>19<br/>20<br/>21</p>                                                                                                                                                                                                                            | <p>To manage patients'<br/>feelings of being<br/>dependent on care,<br/>exposed, vulnerable, and<br/>secure; create conditions<br/>that enhance well being</p>                                                                                                                                                                                                                                                                                                                                                                                                                                |
| <p>22<br/>23<br/>24<br/>25<br/>26<br/>27<br/>28<br/>29<br/>30<br/>31<br/>32<br/>33<br/>34<br/>35 To address patients concerns about their safety; to involve patients in<br/>36 the decision-making process; to improve staff communication skills; to<br/>37 train professionalism in patient-provider relationship; to engage patients<br/>38 proactively in aspects of their care and work issues that they perceive<br/>39 that might impact negatively their care; not to avoid patient-provider<br/>40 prolonged contact; to stimulate patients to share their concerns<br/>41<br/>42<br/>43<br/>44<br/>45<br/>46<br/>47<br/>48<br/>49<br/>50<br/>51<br/>52<br/>53<br/>54<br/>55<br/>56<br/>57<br/>58<br/>59<br/>60</p> | <p>To listen to patients'<br/>history and to ask<br/>question about it, to be<br/>available/attentive<br/>(diminishes helplessness<br/>and insecurity); to<br/>manage basic needs<br/>(food, water, pain relief)<br/>(diminishes feelings of<br/>not being treated<br/>respectfully and that their<br/>symptoms were not<br/>taken seriously); to give<br/>clear information about<br/>risk classification<br/>(diminishes patients'<br/>discomfort and mental<br/>suffering); to show<br/>understanding and<br/>compassion (makes<br/>patients feel secure),<br/>effective communication</p> |

|                                                                                                                                                                                                                                                                                                                                                                                                                                                                                                                                                                                                                                                                                                                                                                                                                                                                                                                                                                                                                                                                                                                                                                                                                                                                                                                                                                                                                                                                                                                                                                                                                                                                                                                                                                                                                                                                                                                                                                                                                                                                                                                                                                                                                                                                                                                                                      |                                                                                                                                                                                                                                                                                                                                                                                                                                                                                                                                                                                                                                                                                                                                                                                                                |
|------------------------------------------------------------------------------------------------------------------------------------------------------------------------------------------------------------------------------------------------------------------------------------------------------------------------------------------------------------------------------------------------------------------------------------------------------------------------------------------------------------------------------------------------------------------------------------------------------------------------------------------------------------------------------------------------------------------------------------------------------------------------------------------------------------------------------------------------------------------------------------------------------------------------------------------------------------------------------------------------------------------------------------------------------------------------------------------------------------------------------------------------------------------------------------------------------------------------------------------------------------------------------------------------------------------------------------------------------------------------------------------------------------------------------------------------------------------------------------------------------------------------------------------------------------------------------------------------------------------------------------------------------------------------------------------------------------------------------------------------------------------------------------------------------------------------------------------------------------------------------------------------------------------------------------------------------------------------------------------------------------------------------------------------------------------------------------------------------------------------------------------------------------------------------------------------------------------------------------------------------------------------------------------------------------------------------------------------------|----------------------------------------------------------------------------------------------------------------------------------------------------------------------------------------------------------------------------------------------------------------------------------------------------------------------------------------------------------------------------------------------------------------------------------------------------------------------------------------------------------------------------------------------------------------------------------------------------------------------------------------------------------------------------------------------------------------------------------------------------------------------------------------------------------------|
| <p>1<br/>2<br/>3<br/>4 Patients were generally positive towards the notion of patient<br/>5 involvement in improving their safety and identified potential<br/>6 advantages; to be able to ask questions or have their concerns<br/>7 addressed, since this provided them with reassurance and a better<br/>8 understanding of what was happening to them and what to expect;<br/>9 perceived advantages expressed by staff were improved adherence to<br/>10 treatment and greater patient satisfaction with care, achieved through<br/>11 better understanding; pushing improvement through patient-mediated<br/>12 intervention, pointing out potential errors or oversights in care provision<br/>13 was felt to be “questioning” or challenging the professionalism of<br/>14 healthcare staff; other actions perceived by patients and relatives as<br/>15 “challenging” or as “criticising” included overtly or explicitly checking<br/>16 that the correct medicines had been administered during drug rounds<br/>17 and asking about alternative treatment options to those recommended<br/>18 by their doctor; patients may experience a loss of trust in the<br/>19 competency or integrity of their care providers, if they feel that they<br/>20 “have to” ask or tell them about potential lapses in their care, because<br/>21 they are not doing the job properly; healthcare providers were expected<br/>22 to always remain “professional” in their dealings with patients and their<br/>23 families, regardless of the situation, and there appeared to be a general<br/>24 consensus amongst both patients and healthcare professionals that<br/>25 most would; being rebuffed or chastised was a very real fear for many<br/>26 patients, and a key barrier to them speaking up; the perceived<br/>27 consequences of upsetting staff, and disrupting relationships, were so<br/>28 powerful that they admitted not sharing potentially serious queries or<br/>29 concerns even with their relatives, who they knew would immediately<br/>30 raise them with staff; staff suggested that they and their colleagues<br/>31 could become guarded in their interactions with certain patients and<br/>32 their relatives, therefore distancing themselves from being the potential<br/>33 target of a complaint.<br/>34<br/>35</p> | <p>To allow patients to<br/>express their symptoms<br/>and feelings freely, they<br/>had a sense that they<br/>were being<br/>acknowledged and taken<br/>seriously; to know what<br/>the nurses were<br/>documenting in their<br/>files, when patients are<br/>assigned a low priority in<br/>the emergency<br/>department (ED); to give<br/>them adequate attention;<br/>to help patients not to<br/>feel helpless and<br/>overlooked; to give<br/>adequate attention; to<br/>explain levels of priority<br/>in the ED so that patients<br/>do not feel insecure; to<br/>be available, attentive,<br/>and responding<br/>appropriately to the<br/>patient’s needs; to<br/>provide adequate food,<br/>drink and pain relief; to<br/>show understanding and<br/>compassion for the<br/>patient’s situation.</p> |
|------------------------------------------------------------------------------------------------------------------------------------------------------------------------------------------------------------------------------------------------------------------------------------------------------------------------------------------------------------------------------------------------------------------------------------------------------------------------------------------------------------------------------------------------------------------------------------------------------------------------------------------------------------------------------------------------------------------------------------------------------------------------------------------------------------------------------------------------------------------------------------------------------------------------------------------------------------------------------------------------------------------------------------------------------------------------------------------------------------------------------------------------------------------------------------------------------------------------------------------------------------------------------------------------------------------------------------------------------------------------------------------------------------------------------------------------------------------------------------------------------------------------------------------------------------------------------------------------------------------------------------------------------------------------------------------------------------------------------------------------------------------------------------------------------------------------------------------------------------------------------------------------------------------------------------------------------------------------------------------------------------------------------------------------------------------------------------------------------------------------------------------------------------------------------------------------------------------------------------------------------------------------------------------------------------------------------------------------------|----------------------------------------------------------------------------------------------------------------------------------------------------------------------------------------------------------------------------------------------------------------------------------------------------------------------------------------------------------------------------------------------------------------------------------------------------------------------------------------------------------------------------------------------------------------------------------------------------------------------------------------------------------------------------------------------------------------------------------------------------------------------------------------------------------------|

1  
2  
3  
4  
5  
6  
7  
8  
9  
10  
11  
12  
13  
14  
15  
16  
17  
18  
19  
20  
21  
22  
23  
24  
25  
26  
27  
28  
29  
30  
31  
32  
33  
34  
35  
36  
37  
38  
39  
40  
41  
42  
43  
44  
45  
46  
47  
48  
49  
50  
51  
52  
53  
54  
55  
56  
57  
58  
59  
60

|                                                                                    |                               |
|------------------------------------------------------------------------------------|-------------------------------|
| Not generalisable beyond the sample studied; small sample, limited geographic area |                               |
| <b>Merakou K. et al (2001)</b>                                                     | <b>Howard M. et al (2013)</b> |
| 2                                                                                  | 2                             |
| 2                                                                                  | 1                             |
| 2                                                                                  | 1                             |
| 2                                                                                  | 2                             |
| 1                                                                                  | 1                             |
| 1                                                                                  | 1                             |
| 0                                                                                  | 2                             |
| 1                                                                                  | 1                             |
| 2                                                                                  | 1                             |
| 1                                                                                  | 1                             |
| <b>14</b>                                                                          | <b>13</b>                     |
| Greece (1996)                                                                      | Australia (1997-2007)         |
| 600                                                                                | 16                            |

|                                                                                                                                                                                                                                                                                                                                                                                                              |                                                                                                                                                                                                                                                                                                                                                                                                                                                                                                                                                                                                               |
|--------------------------------------------------------------------------------------------------------------------------------------------------------------------------------------------------------------------------------------------------------------------------------------------------------------------------------------------------------------------------------------------------------------|---------------------------------------------------------------------------------------------------------------------------------------------------------------------------------------------------------------------------------------------------------------------------------------------------------------------------------------------------------------------------------------------------------------------------------------------------------------------------------------------------------------------------------------------------------------------------------------------------------------|
| <p>600 patients (49,8% men; 50.2% women)</p>                                                                                                                                                                                                                                                                                                                                                                 | <p>16 patients</p>                                                                                                                                                                                                                                                                                                                                                                                                                                                                                                                                                                                            |
| <p>Knowledge of the law on patient's rights; the right to information; the right to decision making; the right to confidentiality; the right to object, mechanism of protection of patients' rights</p>                                                                                                                                                                                                      | <p>Ineffective communication; Standard of care is not acceptable; Treated with disrespect; Ineffective complaints handling systems; Perceptions of negligence</p>                                                                                                                                                                                                                                                                                                                                                                                                                                             |
| <p>To inform patients during the course of their admission; to train healthcare professionals on patients' rights; to provide full information about diagnostic; to improve communication with patients and families; to take the time to attend; to obtain consent; to involve patients in decision-making process; to respect privacy and confidentiality; to establish a complaints management system</p> | <p>Complaint management needs to be redressed; the paradigm shift must go beyond regurgitating complaint data metrics in percentages per patient contact, toward a concerted effort to evaluate what the complaint data are really saying; the voices of the taciturn dissatisfied patients need to be encouraged so that their complaints are heard at the time they are experiencing dissatisfaction; to use this opportunity to identify a more positive and proactive approach in encouraging patients to complain when they are dissatisfied; to influence real-time improvements and patient safety</p> |

|                                                                                                                                                                                                                                                                                                                                                                                                                                                                                                                                                                                                                                                                                                                                                                                                                                                                                                                                                                                                                                                 |                                                                                                                                                                                                                                                                                                                                                                                                                                                                                                                                                                                                                     |
|-------------------------------------------------------------------------------------------------------------------------------------------------------------------------------------------------------------------------------------------------------------------------------------------------------------------------------------------------------------------------------------------------------------------------------------------------------------------------------------------------------------------------------------------------------------------------------------------------------------------------------------------------------------------------------------------------------------------------------------------------------------------------------------------------------------------------------------------------------------------------------------------------------------------------------------------------------------------------------------------------------------------------------------------------|---------------------------------------------------------------------------------------------------------------------------------------------------------------------------------------------------------------------------------------------------------------------------------------------------------------------------------------------------------------------------------------------------------------------------------------------------------------------------------------------------------------------------------------------------------------------------------------------------------------------|
| <p>1<br/>2<br/>3<br/>4<br/>5<br/>6<br/>7<br/>8<br/>9<br/>10<br/>11<br/>12<br/>13<br/>14<br/>15<br/>16<br/>17<br/>18<br/>19<br/>20<br/>21<br/>22<br/>23<br/>24<br/>25<br/>26<br/>27<br/>28<br/>29<br/>30<br/>31<br/>32<br/>33<br/>34</p> <p>Patients most inclined to complain were male, young people, urban residents, people with a low income, and those experiencing a short hospital stay; 94.2% answered they do not claim for their rights, 71.6% replied they did not claim because they were satisfied with hospitalization, 9.7% were afraid of doctors reactions, 9.2% believed that the outcome would not be in their favor, 5.5% reported they were not aware of their rights; 44.4% answered that the patients' rights would be better respected if a committee or an expert were available at the hospital setting, and other mechanisms would be staff education in medical ethics (22.4%), giving patients information about their rights as soon as they were hospitalized 21.4%), introduction of new legislation (5.3%)</p> | <p>15 of the 16 participants did not voice their complaint at the time of the event, when they experienced dissatisfaction with service delivery; the most significant theme that emerged from the narratives was the issue of the participants feeling that they were not being listened to nor supported to voice their concerns or complaints; patients articulated the need for health-care system reform; they primarily wanted to be listened to, to be acknowledged, to be believed, for people to take ownership if they had made a mistake, for mistakes not to occur again, and to receive an apology</p> |
| <p>35<br/>36<br/>37<br/>38<br/>39<br/>40<br/>41<br/>42<br/>43<br/>44<br/>45<br/>46<br/>47<br/>48<br/>49</p> <p>Small sample, limited geographic area</p>                                                                                                                                                                                                                                                                                                                                                                                                                                                                                                                                                                                                                                                                                                                                                                                                                                                                                        | <p>The sample size was limited in terms of location and the fact that there was no culturally and linguistically diverse (CALD) or indigenous representation; limited geographic area</p>                                                                                                                                                                                                                                                                                                                                                                                                                           |

| Faschingbauer KM et al (2013)<br>(a) | Evan E. E. et al (2007) (a)     | Kanengoni B. et al<br>(2019) (a) |
|--------------------------------------|---------------------------------|----------------------------------|
| 2                                    | 2                               | 2                                |
| 2                                    | 2                               | 2                                |
| 2                                    | 2                               | 1                                |
| 1                                    | 2                               | 2                                |
| 1                                    | 1                               | 1                                |
| 1                                    | 1                               | 1                                |
| 2                                    | 2                               | 2                                |
| 2                                    | 2                               | 2                                |
| 2                                    | 1                               | 2                                |
| 2                                    | 2                               | 2                                |
| 17                                   | 17                              | 17                               |
| USA (?)                              | USA (?)                         | Zimbabwe (?)                     |
| 12                                   | 40                              | 20                               |
| 06 men, 06 women                     | 20 pairs of parent and children | 20 pregnant and postpartum       |

|                                              |
|----------------------------------------------|
| Individual i                                 |
| 0 = not or inadequately addressed or applied |
| Tot:                                         |
| Qualitativ                                   |
| Cross-sectio                                 |
| Cohort                                       |
| Quan-quant                                   |
| convergent pi                                |
| method                                       |



|                                                                                                                                                                                                                                                                                                                                                                                                                                                                                                                                                                                                                                                                                                                                                                                                                                                                                                                                                                                                                                                                                                                              |                                                                                                                                                                                                                           |                                                                                                    |
|------------------------------------------------------------------------------------------------------------------------------------------------------------------------------------------------------------------------------------------------------------------------------------------------------------------------------------------------------------------------------------------------------------------------------------------------------------------------------------------------------------------------------------------------------------------------------------------------------------------------------------------------------------------------------------------------------------------------------------------------------------------------------------------------------------------------------------------------------------------------------------------------------------------------------------------------------------------------------------------------------------------------------------------------------------------------------------------------------------------------------|---------------------------------------------------------------------------------------------------------------------------------------------------------------------------------------------------------------------------|----------------------------------------------------------------------------------------------------|
| <p>1<br/>2<br/>3<br/>4<br/>5<br/>6<br/>7<br/>8 1) Patientt hope for respect and<br/>9 open communication; 2) Patient<br/>10 emotional response to the<br/>11 seclusion process; 3) Patient<br/>12 insight into behavior and the<br/>13 importance of positive coping<br/>14 skills</p>                                                                                                                                                                                                                                                                                                                                                                                                                                                                                                                                                                                                                                                                                                                                                                                                                                       | <p>Relationship building,<br/>demonstration of effort and<br/>competence, information<br/>exchange, availability, and<br/>appropriate level of child and<br/>parent involvement</p>                                       | <p>Abandonment of care<br/>and neglect; non-<br/>consented care, lack<br/>of information;</p>      |
| <p>21<br/>22<br/>23<br/>24 To discuss the patients'<br/>25 behavior, to give a chance to<br/>26 calm down before seclusion, to<br/>27 look for alternatives to seclusion,<br/>28 to ask patient to do something<br/>29 instead of telling him what to do,<br/>30 not to ignore the patient during<br/>31 seclusion, to explain the reason<br/>32 for seclusion, to treat patient as<br/>33 an individual, to improve staff<br/>34 communication skills, to know<br/>35 patients' prior history and<br/>36 behavior patterns; 2) To offer<br/>37 fluids and food during seclusion,<br/>38 to manage environment<br/>39 (temperature, cleanliness, noise),<br/>40 not to use seclusion as a<br/>41 punishment, no to mock/laugh<br/>42 at/talk about patients in a<br/>43 negative way, not to disrespect,<br/>44 mistreat or hurt patients, to be<br/>45 attentive to patients' needs; 3) to<br/>46 talk about the reasosn for<br/>47 seclusion, to give patient time to<br/>48 talk, to allow patients to obtain<br/>49 social support from peers,<br/>50 behavior management classes,<br/>51 to debrief after seclusion</p> | <p>To improve communication skills<br/>with children and their parents; to<br/>be attentive; to be available; to<br/>provide clear explanations; to<br/>consider the level of involvement<br/>of children and parents</p> | <p>To be attentive, to<br/>reduce wating times,<br/>to provide adequate<br/>health information</p> |

|                                                                                                                                                                                                                                                                                                                                                                                                                                                                                                                                                                                                                                                                                                                                                                                                                                                                                                                          |                                                                                                                                                                                                                                                                                                                                                                                                                                                                                                                               |                                                                                                                                                                                                                                                                                                                                                                                                                                                                                                                                                                                     |
|--------------------------------------------------------------------------------------------------------------------------------------------------------------------------------------------------------------------------------------------------------------------------------------------------------------------------------------------------------------------------------------------------------------------------------------------------------------------------------------------------------------------------------------------------------------------------------------------------------------------------------------------------------------------------------------------------------------------------------------------------------------------------------------------------------------------------------------------------------------------------------------------------------------------------|-------------------------------------------------------------------------------------------------------------------------------------------------------------------------------------------------------------------------------------------------------------------------------------------------------------------------------------------------------------------------------------------------------------------------------------------------------------------------------------------------------------------------------|-------------------------------------------------------------------------------------------------------------------------------------------------------------------------------------------------------------------------------------------------------------------------------------------------------------------------------------------------------------------------------------------------------------------------------------------------------------------------------------------------------------------------------------------------------------------------------------|
| <p>To provide open communication about patients' individual needs, talking about their feelings and individual problem before his or her behavior escalated and could not be controlled; to discuss their inappropriate behavior; to give a chance to calm down before seclusion; to ask patients to do something instead of telling them what to do; to offer as-needed medications earlier to control behaviors; to know specific medical and psychiatric background and history in order to understanding their personal needs and idiosyncrasies; to check on them while in the seclusion room, to pay attention to unmet patients' needs (to offer fluids, blankets, bathroom, cleanliness etc); not to mock them or laugh at; not to use seclusion as a form of punishment; to talk over the incident leading to seclusion after the episode; to give them time to talk; to provide family and social support.</p> | <p>To take the time to get to know the patients as individuals and develop a friendship with the patients; to be respectful; to inquire about personal or social concerns in addition to treating physical symptoms; to believe the children's words; to provide relational continuity; to help build trust; to demonstrate the best efforts and exhibit competence and knowledge about the child's care; to talk in an understandable, straightforward manner, give clear explanations, and provide complete information</p> | <p>Multifaceted and interconnected factors contribute to midwives' attitudes and behaviours towards their clients. Midwives' subjective perceptions, women's social status, and health system constraints (i.e., availability of trained midwives and quality of midwifery training) in rural and poorly resourced community, often result in inappropriate services, negative attitudes, abusive treatment, and disrespectful behaviour towards women. Poor treatment in maternity care directly contribute to adverse health outcomes and women's satisfaction with services.</p> |
|--------------------------------------------------------------------------------------------------------------------------------------------------------------------------------------------------------------------------------------------------------------------------------------------------------------------------------------------------------------------------------------------------------------------------------------------------------------------------------------------------------------------------------------------------------------------------------------------------------------------------------------------------------------------------------------------------------------------------------------------------------------------------------------------------------------------------------------------------------------------------------------------------------------------------|-------------------------------------------------------------------------------------------------------------------------------------------------------------------------------------------------------------------------------------------------------------------------------------------------------------------------------------------------------------------------------------------------------------------------------------------------------------------------------------------------------------------------------|-------------------------------------------------------------------------------------------------------------------------------------------------------------------------------------------------------------------------------------------------------------------------------------------------------------------------------------------------------------------------------------------------------------------------------------------------------------------------------------------------------------------------------------------------------------------------------------|

|                                                                                                                                                                                                               |                                                                                                                                                                                                                                                                                                                                                                                                                                                                                                                                                                                                                                                                                                                                                                               |                                                                                                                                                                                                                   |
|---------------------------------------------------------------------------------------------------------------------------------------------------------------------------------------------------------------|-------------------------------------------------------------------------------------------------------------------------------------------------------------------------------------------------------------------------------------------------------------------------------------------------------------------------------------------------------------------------------------------------------------------------------------------------------------------------------------------------------------------------------------------------------------------------------------------------------------------------------------------------------------------------------------------------------------------------------------------------------------------------------|-------------------------------------------------------------------------------------------------------------------------------------------------------------------------------------------------------------------|
| <p>Limited to one hospital, can not be transferred to other hospitals, unit cultures and different psychiatric units, difficulty of inpatient psychiatric patients to express their feelings and thoughts</p> | <p>Exclusion of non-English speakers, because families that have a language barrier may have different needs when it comes to communicating with their physician; modest sample size, limiting generalizability; limited geographical, ethnic, and religious variation in the patient population; self-selection bias may also have been a factor because those subjects who chose to participate may be more open to communicating with unfamiliar people than those who refused to be contacted; recruitment of patients through health care providers who may have differing opinions on whether a patient fits the prognosis criteria, especially given the difficulty in predicting length of life for many of the childhood diseases that result in premature death</p> | <p>Limitations noted include complexities in accessing participants, lack of privacy, silencing or limiting some participants replies and lack of re-peat interviews due to hard to reach sample populations.</p> |
| <p><b>Wofford M et al (2004)</b></p>                                                                                                                                                                          | <p><b>Beach M. C. et al (2017) (a)</b></p>                                                                                                                                                                                                                                                                                                                                                                                                                                                                                                                                                                                                                                                                                                                                    |                                                                                                                                                                                                                   |
| <p>2</p>                                                                                                                                                                                                      | <p>1</p>                                                                                                                                                                                                                                                                                                                                                                                                                                                                                                                                                                                                                                                                                                                                                                      |                                                                                                                                                                                                                   |
| <p>1</p>                                                                                                                                                                                                      | <p>1</p>                                                                                                                                                                                                                                                                                                                                                                                                                                                                                                                                                                                                                                                                                                                                                                      |                                                                                                                                                                                                                   |
| <p>1</p>                                                                                                                                                                                                      | <p>1</p>                                                                                                                                                                                                                                                                                                                                                                                                                                                                                                                                                                                                                                                                                                                                                                      |                                                                                                                                                                                                                   |
| <p>1</p>                                                                                                                                                                                                      | <p>1</p>                                                                                                                                                                                                                                                                                                                                                                                                                                                                                                                                                                                                                                                                                                                                                                      |                                                                                                                                                                                                                   |
| <p>2</p>                                                                                                                                                                                                      | <p>1</p>                                                                                                                                                                                                                                                                                                                                                                                                                                                                                                                                                                                                                                                                                                                                                                      |                                                                                                                                                                                                                   |
| <p>0</p>                                                                                                                                                                                                      | <p>0</p>                                                                                                                                                                                                                                                                                                                                                                                                                                                                                                                                                                                                                                                                                                                                                                      |                                                                                                                                                                                                                   |
| <p>1</p>                                                                                                                                                                                                      | <p>1</p>                                                                                                                                                                                                                                                                                                                                                                                                                                                                                                                                                                                                                                                                                                                                                                      |                                                                                                                                                                                                                   |
| <p>1</p>                                                                                                                                                                                                      | <p>1</p>                                                                                                                                                                                                                                                                                                                                                                                                                                                                                                                                                                                                                                                                                                                                                                      |                                                                                                                                                                                                                   |
| <p>0</p>                                                                                                                                                                                                      | <p>1</p>                                                                                                                                                                                                                                                                                                                                                                                                                                                                                                                                                                                                                                                                                                                                                                      |                                                                                                                                                                                                                   |
| <p>1</p>                                                                                                                                                                                                      | <p>1</p>                                                                                                                                                                                                                                                                                                                                                                                                                                                                                                                                                                                                                                                                                                                                                                      |                                                                                                                                                                                                                   |
| <p>10</p>                                                                                                                                                                                                     | <p>9</p>                                                                                                                                                                                                                                                                                                                                                                                                                                                                                                                                                                                                                                                                                                                                                                      |                                                                                                                                                                                                                   |
| <p>USA (1999-2000)</p>                                                                                                                                                                                        | <p>USA (?)</p>                                                                                                                                                                                                                                                                                                                                                                                                                                                                                                                                                                                                                                                                                                                                                                |                                                                                                                                                                                                                   |
| <p>222</p>                                                                                                                                                                                                    | <p>156-260</p>                                                                                                                                                                                                                                                                                                                                                                                                                                                                                                                                                                                                                                                                                                                                                                |                                                                                                                                                                                                                   |

|                                                                                                                                                                                                   |                                                                                                                                                                                                                                                                                                                                                     |
|---------------------------------------------------------------------------------------------------------------------------------------------------------------------------------------------------|-----------------------------------------------------------------------------------------------------------------------------------------------------------------------------------------------------------------------------------------------------------------------------------------------------------------------------------------------------|
| <p>222 complaints (from patients [111], patient's wife [27], husband [6], child [52], parents [50], other relative of friends [15] or a health care professional)</p>                             | <p>26 focus groups of men and women, 6-10 patients each group (African americans, latinoes, whites)</p>                                                                                                                                                                                                                                             |
| <p>Perceived unavailability, Disrespect, Inadequate information, Disagreement about expectations of care, Distrust, Interdisciplinary miscommunication, Misinformation</p>                        | <p>1) Definitions of respect; 2) Specific behaviors that convey respect or dignity</p>                                                                                                                                                                                                                                                              |
| <p>To use patients complaints to improve physicians' communication skills, to avoid disrespectful behavior, to make communication a high priority, to improve interdisciplinary communication</p> | <p>To treat like a person, to treat like an equal, to hear what patient has to say, to respect the patient's knowledge of him/herself, to ask questions about the condition (demonstration of concern), to give honest explanations of medical issues, to avoid stereotyping, to allow patient input into treatment choices, to handle lateness</p> |

|                                                                                                                                                                                                                                                                                                                                                                                                                                                                                                                                                                                                               |                                                                                                                                                                                                                                                                                                                                                                                                                                                                                                                                                                                                                                                                                                                                                                                                                                                                                                                                                            |
|---------------------------------------------------------------------------------------------------------------------------------------------------------------------------------------------------------------------------------------------------------------------------------------------------------------------------------------------------------------------------------------------------------------------------------------------------------------------------------------------------------------------------------------------------------------------------------------------------------------|------------------------------------------------------------------------------------------------------------------------------------------------------------------------------------------------------------------------------------------------------------------------------------------------------------------------------------------------------------------------------------------------------------------------------------------------------------------------------------------------------------------------------------------------------------------------------------------------------------------------------------------------------------------------------------------------------------------------------------------------------------------------------------------------------------------------------------------------------------------------------------------------------------------------------------------------------------|
| <p>Complaints were most commonly lodged by a patient (111), followed by a patient's spouse (33), child (52), parent (50), relative/friend (15), or health care professional (2). The most commonly identified category was disrespect (36%), followed by disagreement about expectations of care (23%), inadequate information (20%), distrust (18%), perceived unavailability (15%), interdisciplinary miscommunication (4%), and misinformation (4%). Multiple categories were identified in 42 (19%) complaints. Examples from each category provide adequate detail to develop instructional modules.</p> | <p>Autonomy: clearly expressed by participants in the themes of wanting honest and clear explanations, and in wanting input into treatment plans. Dignity: treating people equally; asking questions about medical conditions, might be interpreted as a sense of caring or investment in the value of the patient as person through concern about medical issues. Integrity: to listen to the patient's narrative, knowing the patient as a unique person, and the avoidance of stereotyping. Trusting patients' self-knowledge: is of particular interest because of its prominence among African American participants, and because it perhaps pushes the conceptualization of respect into new territory. Vulnerability: respect for vulnerability was not explicitly mentioned by any participants. Yet vulnerability emerges as present when viewing the corpus of participant comments as a whole in particular, vulnerability to mistreatment.</p> |
| <p>Not generalizable, because many patients leave silently and do not register complaints</p>                                                                                                                                                                                                                                                                                                                                                                                                                                                                                                                 | <p>Imprecise number of participants, time frame of data collection is missing</p>                                                                                                                                                                                                                                                                                                                                                                                                                                                                                                                                                                                                                                                                                                                                                                                                                                                                          |

**CRITICAL APPRAISAL SCORES**

|                                                                        |                               |                                                                                   |                     |
|------------------------------------------------------------------------|-------------------------------|-----------------------------------------------------------------------------------|---------------------|
| <b>Item score (color and value)</b>                                    |                               | (a) Did not cite explicitly the data collection date/time frame (e.g. month/year) |                     |
| 1 = adequately addressed or applied                                    | 2 = well addressed or applied |                                                                                   |                     |
| <b>Qualitative Score Appraisal by study design, color and value</b>    |                               |                                                                                   |                     |
|                                                                        | <b>Low quality</b>            | <b>Moderate quality</b>                                                           | <b>High quality</b> |
| <b>Randomised controlled trials</b>                                    | 0-7                           | 8-14                                                                              | 15-20               |
| <b>Quasi-randomised studies</b>                                        | 0-9                           | 10-17                                                                             | 18-24               |
| <b>Case-control study</b>                                              | 0-9                           | 10-17                                                                             | 18-24               |
| <b>Cohort, case-series, cross-sectional and parallel mixed-studies</b> | 0-4                           | 5-9                                                                               | 10-14               |

Peer review only

|                                                       | <b>Gebremichael MW et al (2018)</b> |
|-------------------------------------------------------|-------------------------------------|
| <b>Design</b>                                         | 2                                   |
| <b>Question</b>                                       | 2                                   |
| <b>Setting/location</b>                               | 2                                   |
| <b>Selection</b>                                      | 2                                   |
| <b>Characteristics</b>                                | 2                                   |
| <b>Exposure &amp; outcomes</b>                        | 2                                   |
| <b>Study size</b>                                     | 2                                   |
| <b>Statistics</b>                                     | 2                                   |
| <b>Eligibility</b>                                    | 2                                   |
| <b>Results</b>                                        | 2                                   |
| <b>Conflict of interest</b>                           | 2                                   |
| <b>Limitations</b>                                    | 2                                   |
| <b>Total</b>                                          | <b>24</b>                           |
| <b>Country (year of research and data collection)</b> | Ethiopia (2015)                     |
| <b>Sample size</b>                                    | 1,125                               |
| <b>Type of samples</b>                                | 1,125 women post-delivery           |

1  
2  
3  
4  
5  
6  
7  
8  
9  
10  
11  
12  
13  
14  
15  
16  
17  
18  
19  
20  
21  
22  
23  
24  
25  
26  
27  
28  
29  
30  
31  
32  
33  
34  
35  
36  
37  
38  
39  
40  
41  
42  
43  
44  
45  
46  
47  
48  
49  
50  
51  
52  
53  
54  
55  
56  
57  
58  
59  
60

|                                                                                                                      |                                                         |                                                                                                                                                                                                                                        |
|----------------------------------------------------------------------------------------------------------------------|---------------------------------------------------------|----------------------------------------------------------------------------------------------------------------------------------------------------------------------------------------------------------------------------------------|
| <p><b>or Review Evidence (SURE) - Questions to assist with the critical appraisal of cross-sectional studies</b></p> | <p><b>STRATEGIES/BEHAVIORS/OUTCOMES OF INTEREST</b></p> | <p>To increase respect and reduce abuse</p>                                                                                                                                                                                            |
|                                                                                                                      | <p><b>INTERVENTIONS TO ACHIEVE IMPROVEMENTS</b></p>     | <p>To avoid shouting, scolding, ignoring, to offer adequate information, to obtain consent, to avoid breaching in confidentiality and privacy, to avoid leaving women unattended, to allow women to participate in decision-making</p> |



|                    |             |                                                                                                                                                                                                                                                                                                                                                                                                                                                                                                                                                                                                                                                                                                                                                                                                                                                                                                                               |
|--------------------|-------------|-------------------------------------------------------------------------------------------------------------------------------------------------------------------------------------------------------------------------------------------------------------------------------------------------------------------------------------------------------------------------------------------------------------------------------------------------------------------------------------------------------------------------------------------------------------------------------------------------------------------------------------------------------------------------------------------------------------------------------------------------------------------------------------------------------------------------------------------------------------------------------------------------------------------------------|
| Specialist Unit fo | RESULTS     | <p><b>More D and A:</b> Disrespect and abuse (D and A) during delivery services was reported more among: women residing in urban compared with rural areas and women educated to grade 9 or above; women in the age groups 20–34, and 35 or above, compared to those below the age of 20 years, women who were heads of households reported more incidents of D and A compared with women living in a household headed by a male; women who spent longer hours in labour in health facilities, compared with women who spent less than 1 hour in labour; women who were not permitted to have support persons/relatives in the delivery room also reported a significantly higher rate of D and A during labour and delivery compared with those women who were allowed to have support persons. <b>Less D and A:</b> Women who had 3–5 births experienced fewer incidents of D and A than women with more than 5 births.</p> |
|                    | LIMITATIONS | <p>Recall period of one year after delivery can be too long to remember details; there may be sampling bias due to focus on a single encounter in the previous year; excluded stillbirths, neonatal and infant deaths; underreporting by rural women due to their lack of awareness of their rights; did not include economic status in the analysis; information about facilities were not included</p>                                                                                                                                                                                                                                                                                                                                                                                                                                                                                                                      |

|                     |                                                       |                                                                                                                                         |
|---------------------|-------------------------------------------------------|-----------------------------------------------------------------------------------------------------------------------------------------|
| <b>onal studies</b> |                                                       | <b>Montesinos-Segura R et al (2017)</b>                                                                                                 |
|                     | <b>Design</b>                                         | 2                                                                                                                                       |
|                     | <b>Question</b>                                       | 2                                                                                                                                       |
|                     | <b>Setting/location</b>                               | 2                                                                                                                                       |
|                     | <b>Selection</b>                                      | 2                                                                                                                                       |
|                     | <b>Characteristics</b>                                | 2                                                                                                                                       |
|                     | <b>Exposure &amp; outcomes</b>                        | 2                                                                                                                                       |
|                     | <b>Study size</b>                                     | 2                                                                                                                                       |
|                     | <b>Statistics</b>                                     | 2                                                                                                                                       |
|                     | <b>Eligibility</b>                                    | 1                                                                                                                                       |
|                     | <b>Results</b>                                        | 1                                                                                                                                       |
|                     | <b>Conflict of interest</b>                           | 2                                                                                                                                       |
|                     | <b>Limitations</b>                                    | 2                                                                                                                                       |
|                     | <b>Total</b>                                          | <b>22</b>                                                                                                                               |
|                     | <b>Country (year of research and data collection)</b> | Peru (2016)                                                                                                                             |
|                     | <b>Sample size</b>                                    | 1.528                                                                                                                                   |
|                     | <b>Type of samples</b>                                | 1,528 women who delivered in 14 regional hospitals located in nine urban Peruvian cities                                                |
|                     | <b>STRATEGIES/BEHAVIOR S/OUTCOMES OF INTEREST</b>     | Interventions to reduce the prevalence of disrespect and abuse should be promptly implemented, with different approaches in each region |

1  
2  
3  
4  
5  
6  
7  
8  
9  
10  
11  
12  
13  
14  
15  
16  
17  
18  
19  
20  
21  
22  
23  
24  
25  
26  
27  
28  
29  
30  
31  
32  
33  
34  
35  
36  
37  
38  
39  
40  
41  
42  
43  
44  
45  
46  
47  
48  
49  
50  
51  
52  
53  
54  
55  
56  
57  
58  
59  
60

**e (SURE) - Questions to assist with the critical appraisal of cross-section**

**INTERVENTIONS TO ACHIEVE IMPROVEMENTS**

Face-to-face and virtual training might be used to enhance the capability of healthcare workers, and the importance of education to empower women should be emphasized; human resource centers for women to make complaints of disrespect and abuse safely and comfortably might be implemented; to measure the prevalence of disrespect and abuse at various time intervals; approaches specific to each setting are required; these problems should not be uniformly addressed throughout the country, and that each hospital and geographic region should prioritize interventions according to their particular context; to promote participation of a companion chosen by the pregnant woman throughout their labor

|                                     |             |                                                                                                                                                                                                                                                                                                                                                                                                                                                                                                                                                                                                                                                                                                                                                                                                                                                                                                                                       |
|-------------------------------------|-------------|---------------------------------------------------------------------------------------------------------------------------------------------------------------------------------------------------------------------------------------------------------------------------------------------------------------------------------------------------------------------------------------------------------------------------------------------------------------------------------------------------------------------------------------------------------------------------------------------------------------------------------------------------------------------------------------------------------------------------------------------------------------------------------------------------------------------------------------------------------------------------------------------------------------------------------------|
| Specialist Unit for Review Evidence | RESULTS     | <p>1488 women experienced abuse; the most prevalent form of disrespect and abuse was non-dignified care, followed by non-consented care, and non-confidential care; the number of women who experienced two or more categories of disrespect and abuse concurrently was 1358, whereas that of women who experienced four or more categories concurrently was 850; women who delivered by cesarean had a higher prevalence of abandonment of care and a lower prevalence of physical abuse as compared with women who delivered vaginally; women referred from other health facilities had a lower prevalence of abandonment of care, non-consented care, discrimination, and non-confidential care as compared with women who were not referred; abandonment of care was significantly more common in the coastal region than in the jungle, whereas discrimination was significantly more common in the jungle than at the coast</p> |
|                                     | LIMITATIONS | <p>The aim was to generate a validated survey of disrespect and abuse suitable for all Peruvian hospitals; however, each geographic region has its own unique cultural features and traditions; it is possible that some of the items listed in the survey were not part of the disrespect and abuse construct in some contexts; the length of the survey was a limiting factor; the participants might have felt intimidated by the hospital environment, which in turn might have influenced their responses; only women who had delivered in the past 48 hours were surveyed; this population of women could have been affected by immediate distressing factors related to labor, which might have influenced their answers</p>                                                                                                                                                                                                   |

|    |                                                              |
|----|--------------------------------------------------------------|
| 1  |                                                              |
| 2  | <b>Vedam S et al (2019)</b>                                  |
| 3  | 2                                                            |
| 4  | 2                                                            |
| 5  | 2                                                            |
| 6  |                                                              |
| 7  |                                                              |
| 8  | 2                                                            |
| 9  |                                                              |
| 10 | 2                                                            |
| 11 | 2                                                            |
| 12 | 2                                                            |
| 13 |                                                              |
| 14 | 2                                                            |
| 15 | 2                                                            |
| 16 | 2                                                            |
| 17 | 2                                                            |
| 18 | 2                                                            |
| 19 | 2                                                            |
| 20 | 2                                                            |
| 21 | 2                                                            |
| 22 | 2                                                            |
| 23 | 2                                                            |
| 24 | 2                                                            |
| 25 | 2                                                            |
| 26 | <b>24</b>                                                    |
| 27 |                                                              |
| 28 |                                                              |
| 29 |                                                              |
| 30 | USA (2010-2016)                                              |
| 31 |                                                              |
| 32 |                                                              |
| 33 |                                                              |
| 34 | 2.138                                                        |
| 35 |                                                              |
| 36 |                                                              |
| 37 |                                                              |
| 38 | 2138 women who experienced at least one pregnancy in the US, |
| 39 | including those currently pregnant                           |
| 40 |                                                              |
| 41 |                                                              |
| 42 |                                                              |
| 43 |                                                              |
| 44 |                                                              |
| 45 |                                                              |
| 46 |                                                              |
| 47 |                                                              |
| 48 |                                                              |
| 49 |                                                              |
| 50 |                                                              |
| 51 |                                                              |
| 52 |                                                              |
| 53 |                                                              |
| 54 |                                                              |
| 55 |                                                              |
| 56 |                                                              |
| 57 |                                                              |
| 58 |                                                              |
| 59 |                                                              |
| 60 |                                                              |

1  
2  
3  
4  
5  
6  
7  
8  
9  
10  
11  
12  
13 Physical abuse, sexual abuse, verbal abuse, stigma and  
14 discrimination, failure to meet professional standards of care, poor  
15 rapport between women and providers, health system conditions and  
16 constraints  
17  
18  
19  
20  
21  
22  
23  
24  
25  
26  
27

28  
29  
30  
31 Development of several new patient-designed indicators of  
32 mistreatment in maternity care; to prevent mistreatment, health care  
33 providers need to first consider how they can meet women's socio-  
34 cultural, emotional and psychological needs; building collaborations  
35 to address factors that maintain racial and ethnic disparities; creating  
36 a culture of equity and individualized care and routine training around  
37 issues of structural racism and intersectionality of multiple drivers of  
38 disadvantage; moving to the development of multidisciplinary teams;  
39 addressing issues of access to high quality care across communities  
40 and settings for care; equitable application of evidence-based  
41 interventions that are responsive to patient reported outcomes and  
42 priorities; training for care providers in promoting respectful care  
43 including values clarification and attitude transformation (VCAT),  
44 training on VCAT based on providers' and clients' rights and  
45 obligations, and revision of professional ethics and practices;  
46 strengthening facility quality improvement systems for monitoring,  
47 reporting, addressing, and resolving disrespect and abuse cases;  
48 Mentorship and on-the-job role-modeling by identified champions  
49 within the facility as part of routine continuous professional education;  
50 civic education about patient rights and avenues for redress may be  
51 needed to ensure accountability even in high resource countries  
52  
53  
54  
55  
56  
57  
58  
59  
60

1  
2  
3  
4  
5 1 in 6 women experienced more than one type of mistreatment (being  
6 shouted at; ignored by healthcare providers/refusing request for  
7 help/failing to respond request; violation of physical privacy;  
8 healthcare providers threatening to withhold treatment or forcing them  
9 to accept treatment they did not want; physical abuse [aggressive  
10 physical contact, inappropriate sexual conduct, refusal to provide  
11 anesthesia for an episiotomy, etc.]; any mistreatment [one or more  
12 above]. Indigenous, Hispanic, Black, White, White women with White  
13 partners, White women with Black partner experienced one type of  
14 mistreatment; Bi-racial couples experienced less mistreatment when  
15 women were White; White women with Black partners were twice  
16 likely to report mistreatment than White women with White partners;  
17 women who were born in the US reported similar rates of  
18 mistreatment compared to women who were not born in the US;  
19 recent immigrants were more likely to report mistreatment; younger  
20 women were more likely to report physical abuse; first-time mothers  
21 were twice as likely to report mistreatment; women who reported low  
22 socioeconomic status (SES) were twice as likely to report  
23 mistreatment compared to women with moderate or high SES; 1 in 3  
24 women with pregnancy complications or with social risk (substance  
25 use, incarceration, domestic violence) reported mistreatment (shouted  
26 at, scolded, violation of physical privacy); mistreatment was higher in  
27 hospital than in other settings  
28  
29  
30  
31  
32  
33  
34  
35

36  
37  
38 The sample is voluntary and not population-based; oversampling of  
39 communities that are often underrepresented in national studies on  
40 experience of care; women were more educated, older, and more  
41 likely to have been born in the US; samples of women from Hispanic,  
42 Asian, and other communities of color were lower than the national  
43 reported rates; lower representation from women who had more  
44 routine or simply "satisfactory" experiences that might not be  
45 characterized as either particularly empowering nor traumatizing;  
46 sample might have a 'higher' socioeconomic status population than is  
47 representative of the US childbearing population which would  
48 decrease rates of reported mistreatment, and potentially  
49 underestimate mistreatment in the US population at large; the study's  
50 national sample is not representative of the lived experience of many  
51 subgroups including undocumented immigrants, incarcerated  
52 pregnant parents, and families located in rural settings with limited  
53 options for maternity care; each person will have their own sense of  
54 bodily/self autonomy and human rights, placed within the cultural  
55 context of each environment  
56  
57  
58  
59  
60





1  
2  
3  
4  
5  
6  
7  
8  
9  
10  
11  
12  
13  
14  
15  
16  
17  
18  
19  
20  
21  
22  
23  
24  
25  
26  
27  
28  
29  
30  
31  
32  
33  
34  
35  
36  
37  
38  
39  
40  
41  
42  
43  
44  
45  
46  
47  
48  
49  
50  
51  
52  
53  
54  
55  
56  
57  
58  
59  
60

To avoid negative perceptions of minority groups (low-income, low educational level, different races); to focus on approaches that can best improve the perceptions of respect

1  
2  
3  
4  
5  
6  
7  
8 Over 14% of blacks, 19% of Hispanics, and 20% of Asians reported  
9 they have been treated with disrespect by their doctor. Men (15.9%)  
10 were more likely than women (11.6%) to perceive being treated with  
11 disrespect by their doctor. Asian (24%) and Hispanic (23%) men were  
12 more likely than black (17%) and white (11%) men to perceive being  
13 treated with disrespect. 18% of persons without a college education  
14 believed they have been treated with disrespect versus only 10% of  
15 those with college education. 29% of Asians, 22% of Hispanics, and  
16 19% of blacks without a college education reported being treated with  
17 disrespect or being looked down upon, versus 13% of whites; 32.3%  
18 of those who felt being treated with disrespect or being looked down  
19 upon did not follow doctors advice, and 31.1% put off needed care.  
20 Among those who felt treated unfairly because of race, 46.5% did not  
21 follow doctors advice, and 40.8% put off needed care. Among those  
22 who felt treated unfairly because of their language, 37.5% put off  
23 needed care. Among those who felt they would have been treated  
24 better had they been of a different race, 33.8% did not follow doctors'  
25 advice or put off care.  
26  
27  
28  
29  
30  
31  
32  
33  
34

35  
36  
37  
38  
39  
40  
41  
42  
43  
44  
45 Relying on self-report, may not be accurate; could not disentangle  
46 how general life experiences influence perceptions; could not  
47 examine other minorities; had insufficient number of native americans  
48 to analyse separately; lack of agreement on the definition of age-  
49 appropriate cancer screening  
50  
51  
52  
53  
54  
55  
56  
57  
58  
59  
60



1  
2  
3  
4  
5  
6  
7  
8  
9  
10  
11  
12  
13  
14 Friendliness, comfort, and attention; information and consent; non-abuse and kindness  
15  
16  
17  
18  
19  
20  
21  
22  
23  
24  
25  
26  
27  
28  
29  
30  
31  
32  
33  
34  
35  
36  
37  
38  
39  
40

41 Not to treat patients of different ages differently, not to discriminate, to avoid ageism; to respect  
42 confidentiality; to manage complications in labor and delivery; to allow companionship; to give  
43 information clearly; to give friendly, comforting and attentive care; to be patient; to provide  
44 mentoring for providers; strategies to reduce workplace stress, training on respectful maternity  
45 care,  
46  
47  
48  
49  
50  
51  
52  
53  
54  
55  
56  
57  
58  
59  
60

1  
2  
3  
4  
5  
6  
7 **Receipt of respectful maternity care dimension 1 (RMC-D1) (friendliness, comfort, and**  
8 **attention):** clients aged 30-39 and 40-49 years had significantly higher RMC-D1 scores than  
9 clients aged 15-19 years. Clients who experienced delivery complications had significantly lower  
10 RMC-D1 scores compared to those who did not report complications. Clients of providers who  
11 perceived they were paid fairly for their job duties had significantly higher RMC-D1 scores  
12 compared with clients of providers who felt they were not paid fairly. Clients of nurses/midwives  
13 had significantly lower RMC-D1 scores compared to clients of clinicians. Clients of providers who  
14 reported attending 11-20 deliveries in the last month had significantly lower RMC-D1 scores  
15 compared to clients of providers who attended 1-10 deliveries. **Receipt of respectful maternity**  
16 **care dimension 2 (RMC-D2) (information and consent):** clients who had a birth companion  
17 had significantly higher scores compared to clients who did not have a companion in labor.  
18 Clients who reported attending to religious services at least weekly had significantly lower RMC-  
19 D2 scores compared to those who reported less than weekly attendance. Clients of providers  
20 who perceived they were paid fairly for their job duties had significantly higher RMC-D2 scores  
21 compared to clients of providers who perceived they are not paid fairly. Clients of providers who  
22 reported working more hours per week had significantly higher scores compared to clients of  
23 providers who work fewer hours. Clients of providers aged 30-39 and 40-49 years had  
24 significantly lower RMC-D2 scores compared to clients of providers aged 20-29 years. **Receipt**  
25 **of respectful maternal care dimension 3 (RMC-D3) (non-abuse and kindness):** clients of  
26 providers who were aged 50 years or more had significantly higher RMC-D3 scores compared to  
27 clients of providers in the 20-29 year age group. Clients of providers who reported access to two  
28 types of electronic mentoring had significantly higher RMC-D3 scores compared to clients of  
29 providers with no access to mentoring opportunities.  
30  
31  
32  
33  
34  
35

36  
37  
38  
39  
40  
41  
42  
43  
44  
45  
46  
47  
48 No differentiation in degree of disrespect; no random sampling, cannot make causal inferences  
49 and generalize findings; limited ability to identify all risk factors  
50  
51  
52  
53  
54  
55  
56  
57  
58  
59  
60

1  
2  
3  
4  
5  
6  
7  
8  
9  
10  
11  
12  
13  
14  
15  
16  
17  
18  
19  
20  
21  
22  
23  
24  
25  
26  
27  
28  
29  
30  
31  
32  
33  
34  
35  
36  
37  
38  
39  
40  
41  
42  
43  
44  
45  
46  
47  
48  
49  
50  
51  
52  
53  
54  
55  
56  
57  
58  
59  
60

|                                                                                                          |  |
|----------------------------------------------------------------------------------------------------------|--|
| <b>McMahon SA (2014)</b>                                                                                 |  |
| 1                                                                                                        |  |
| 2                                                                                                        |  |
| 2                                                                                                        |  |
| 2                                                                                                        |  |
| 2                                                                                                        |  |
| 2                                                                                                        |  |
| 2                                                                                                        |  |
| 2                                                                                                        |  |
| 2                                                                                                        |  |
| 2                                                                                                        |  |
| 1                                                                                                        |  |
| 2                                                                                                        |  |
| 2                                                                                                        |  |
| <b>22</b>                                                                                                |  |
| Tanzania (2011)                                                                                          |  |
| 112                                                                                                      |  |
| 49 women, 27 male partners, 20 community health workers, 5 community leaders, 11 religious leaders       |  |
| Feeling ignored or neglected, monetary demands or discriminatory treatment, verbal abuse, physical abuse |  |

1  
2  
3  
4  
5  
6  
7  
8  
9  
10  
11  
12  
13  
14  
15  
16  
17  
18  
19  
20  
21  
22  
23  
24  
25  
26  
27  
28  
29  
30  
31  
32  
33  
34  
35  
36  
37  
38  
39  
40  
41  
42  
43  
44  
45  
46  
47  
48  
49  
50  
51  
52  
53  
54  
55  
56  
57  
58  
59  
60

Patients may be made aware of women's rights; include providers in participatory trainings; trainings must be supported by health system; improve the working environment (general infrastructure, human resource shortages, deficiencies in supervision and skills training); inclusion of family members during labour and childbirth

1  
2  
3  
4  
5  
6  
7  
8  
9  
10  
11  
12  
13  
14  
15 Women recounted events or circumstances that are described as abusive in maternal health  
16 literature: feeling ignored or neglected; monetary demands or discriminatory treatment; verbal  
17 abuse; and in rare instances physical abuse. As a response to abuse, women described  
18 acquiescence or non-confrontational strategies: resigning oneself to abuse, returning home, or  
19 bypassing certain facilities or providers. Male respondents described more assertive approaches:  
20 requesting better care, paying a bribe, lodging a complaint and in one case assaulting a provider.  
21  
22  
23  
24  
25  
26  
27  
28  
29  
30  
31  
32  
33  
34

35  
36  
37  
38  
39  
40  
41  
42  
43  
44  
45  
46 Rely on reports, not on direct observation; abuse was not evenly probed in each interview;  
47 captured insights of women who delivered several months earlier and may have a recall bias; did  
48 not reach data saturation; did not interview providers; did not identify and interview escorts  
49  
50  
51  
52  
53  
54  
55  
56  
57  
58  
59  
60



|    |                                |
|----|--------------------------------|
| 1  |                                |
| 2  | <b>Kujawski S et al (2015)</b> |
| 3  | 2                              |
| 4  | 2                              |
| 5  | 2                              |
| 6  |                                |
| 7  |                                |
| 8  | 2                              |
| 9  |                                |
| 10 | 2                              |
| 11 |                                |
| 12 | 2                              |
| 13 |                                |
| 14 | 2                              |
| 15 |                                |
| 16 | 2                              |
| 17 | 1                              |
| 18 | 2                              |
| 19 | 2                              |
| 20 | 2                              |
| 21 | 2                              |
| 22 |                                |
| 23 | 2                              |
| 24 |                                |
| 25 | 2                              |
| 26 |                                |
| 27 | <b>23</b>                      |
| 28 |                                |
| 29 |                                |
| 30 | Tanzania (2011-2012)           |
| 31 |                                |
| 32 |                                |
| 33 |                                |
| 34 | 1.388                          |
| 35 |                                |
| 36 |                                |
| 37 |                                |
| 38 | 1,388 postpartum               |
| 39 |                                |
| 40 |                                |
| 41 |                                |
| 42 |                                |
| 43 |                                |
| 44 |                                |
| 45 |                                |
| 46 |                                |
| 47 |                                |
| 48 |                                |
| 49 |                                |
| 50 |                                |
| 51 |                                |
| 52 |                                |
| 53 |                                |
| 54 |                                |
| 55 |                                |
| 56 |                                |
| 57 |                                |
| 58 |                                |
| 59 |                                |
| 60 |                                |

1  
2  
3  
4  
5  
6  
7  
8  
9  
10  
11  
12  
13 Satisfaction with delivery, perceived quality of care for  
14 delivery, intention to delivery to the same facility for the  
15 next birth  
16  
17  
18  
19  
20  
21  
22  
23  
24  
25  
26  
27

28  
29  
30  
31  
32  
33  
34  
35  
36  
37  
38  
39  
40  
41  
42 Providers empathy; reduce Caesarian sections and  
43 financial burden on women and their families; provide  
44 information and education; privacy to complain  
45  
46  
47  
48  
49  
50  
51  
52  
53  
54  
55  
56  
57  
58  
59  
60

1  
2  
3  
4  
5  
6  
7  
8 Women who reported any disrespectful and abusive  
9 treatment during childbirth were less likely to be very  
10 satisfied with delivery, were less likely to rate the quality of  
11 care for delivery as excellent or very good, and were also  
12 less likely to plan to deliver at the same facility with their  
13 next child. Women were less likely to be very satisfied  
14 with their delivery if they had at least a secondary  
15 education, had a Caesarean section, and reported  
16 extreme pain during labor and delivery. The oldest  
17 participants, aged 35-48, were also less likely to be very  
18 satisfied with their delivery, compared to the youngest  
19 group, aged 15-19. Those who rated their health as very  
20 good or good were more likely to rate satisfaction and  
21 quality of care positively and were more likely to intend to  
22 deliver at the same facility in the future. Women who were  
23 married and for whom this delivery was their first birth  
24 were less likely to intend to deliver their next child at the  
25 same facility.  
26  
27  
28  
29  
30  
31  
32  
33  
34  
35

36  
37  
38  
39  
40  
41  
42  
43  
44  
45  
46  
47 Lack of a gold standard to measure disrespect and abuse;  
48 did not include some aspects of health system; unable to  
49 discern causality  
50  
51  
52  
53  
54  
55  
56  
57  
58  
59  
60



1  
2  
3  
4 To be more attentive to the patient's space and respect  
5 the territoriality established by them, often with their  
6 personal objects and possessions. Small actions, such as  
7 changing the place of the cell phone or slippers, can  
8 symbolize the removal of territory and generate strong  
9 feelings of discomfort; nudity in front of strangers can be  
10 deeply iatrogenic. Within this context, the age, gender and  
11 culture of the affected subjects can directly affect the  
12 communication dynamics; The patients reported that  
13 requesting permission to manipulate their body, to  
14 examine them or to perform other care/procedure shows  
15 consideration and attention on the part of the professional,  
16 which makes the patient feel valued and in control of the  
17 situation. This approach may minimize the effects of the  
18 invasion and the feeling of being seen as an object; The  
19 respect of territory and personal space represents an  
20 ethical and respectful approach to patients, which can  
21 permit to maintain their dignity even under vulnerable  
22 conditions, favouring their recovery; Healthcare should  
23 respect the individuality and dignity of the patient, not only  
24 including changes in the physical space, but also in the  
25 actions and behavior of healthcare providers regarding  
26 patient privacy.  
27  
28  
29  
30  
31  
32  
33  
34  
35  
36  
37  
38  
39  
40  
41  
42  
43  
44  
45  
46  
47  
48  
49  
50  
51  
52  
53  
54  
55  
56  
57  
58  
59  
60

1  
2  
3  
4  
5  
6  
7  
8  
9 The perception of invasion of territorial space was greater  
10 than that of personal space; the participants reported that  
11 touching their personal possessions without permission,  
12 changing the bedside table to a position that cannot be  
13 reached, and raising or lowering the window blinds without  
14 consulting the patient were attitudes of the nursing staff  
15 that annoyed them and caused a feeling of invasion;  
16 embarrassing attitudes occur when the nursing staff  
17 conduct a technical procedure in an intimate area or  
18 change the patient's clothes without a screen; patients  
19 who had no children and those living with only one person  
20 in the residence perceived greater invasion of their  
21 territorial space; patients who shared the room or were  
22 hospitalized in the maternity ward felt less personal space  
23 invasion  
24  
25  
26  
27  
28  
29  
30  
31  
32  
33  
34

35  
36  
37  
38  
39  
40  
41  
42 Non-random selection of the participants, the fact that it  
43 was performed in only one public hospital in Brazil, which  
44 serves predominantly the maternal and child public and,  
45 consequently, the significant number of female  
46 participants, unbalancing the sample with respect to  
47 gender. The cross-sectional nature of our study can only  
48 provide associations, the study evaluated only self-  
49 reported perceptions of patients and not actual practice by  
50 healthcare staff and the sample is not representative of  
51 other settings in the country.  
52  
53  
54  
55  
56  
57  
58  
59  
60

|    |                                                           |
|----|-----------------------------------------------------------|
| 1  |                                                           |
| 2  |                                                           |
| 3  | <b>Burrowes S et al (2017)</b>                            |
| 4  | 2                                                         |
| 5  | 2                                                         |
| 6  |                                                           |
| 7  |                                                           |
| 8  | 2                                                         |
| 9  |                                                           |
| 10 |                                                           |
| 11 | 2                                                         |
| 12 | 2                                                         |
| 13 |                                                           |
| 14 |                                                           |
| 15 | 2                                                         |
| 16 |                                                           |
| 17 | 2                                                         |
| 18 | 1                                                         |
| 19 |                                                           |
| 20 | 2                                                         |
| 21 | 2                                                         |
| 22 |                                                           |
| 23 | 2                                                         |
| 24 |                                                           |
| 25 | 2                                                         |
| 26 |                                                           |
| 27 | <b>23</b>                                                 |
| 28 |                                                           |
| 29 |                                                           |
| 30 | Ethiopia (2015)                                           |
| 31 |                                                           |
| 32 |                                                           |
| 33 |                                                           |
| 34 | 45                                                        |
| 35 |                                                           |
| 36 |                                                           |
| 37 | 45 (23 women who gave birth attended by a midwife, 3      |
| 38 | women who had given birth at home, 15 3rd-year bachelor's |
| 39 | degree midwifery students, and 4 practicing midwives)     |
| 40 |                                                           |
| 41 |                                                           |
| 42 |                                                           |
| 43 |                                                           |
| 44 |                                                           |
| 45 |                                                           |
| 46 |                                                           |
| 47 |                                                           |
| 48 |                                                           |
| 49 |                                                           |
| 50 |                                                           |
| 51 |                                                           |
| 52 |                                                           |
| 53 |                                                           |
| 54 |                                                           |
| 55 |                                                           |
| 56 |                                                           |
| 57 |                                                           |
| 58 |                                                           |
| 59 |                                                           |
| 60 |                                                           |

1  
2  
3  
4  
5  
6  
7  
8  
9  
10  
11  
12  
13  
14 Increase midwifery training in patient's rights and autonomy  
15  
16  
17  
18  
19  
20  
21  
22  
23  
24  
25  
26  
27

28  
29  
30  
31  
32  
33  
34  
35  
36  
37  
38  
39  
40  
41  
42 To strengthen professional ethics, communication skills,  
43 patients' rights, patient's choice, and patients' autonomy  
44 training; to explore ways to structure birh experiences in  
45 order to empower women; women-centered care  
46  
47  
48  
49  
50  
51  
52  
53  
54  
55  
56  
57  
58  
59  
60



1  
2  
3  
4  
5 The quality of care offered at the facility seemed to be a  
6 factor in women's choice of home rather than facility birth;  
7 patients and providers first, and most frequently, mentioned  
8 verbal abuse; patients mention denial of preferred birth  
9 position, while providers report verbal abuse as the leading  
10 type of violation. Patients reported that providers often  
11 shouted at them or at other patients, mocked them, or spoke  
12 to them in harsh tones; the most common type of physical  
13 abuse witnessed was slapping patients on the legs in order  
14 to get them to comply with midwives' instructions for vaginal  
15 exams or for positioning for labor; patients were allowed to  
16 drink liquids during labor, but food was frequently denied;  
17 most patients were not allowed to give birth in their desired  
18 position, and a large minority were not permitted to have  
19 family members or friends accompany them during delivery;  
20 midwives and midwifery students mentioned observing  
21 practices such as stitching episiotomies without anesthesia,  
22 performing procedures without informing the patient, and  
23 denial of follow-up care to patients who had previously  
24 refused services; patients complained frequently about the  
25 lack of privacy on the wards due to the lack of screens or  
26 curtains and also due to the large number of students who  
27 observe deliveries as part of their training  
28  
29  
30  
31  
32  
33  
34  
35

36  
37  
38  
39  
40  
41  
42  
43  
44  
45  
46  
47  
48 Small sample; limited to a single geographic region; based  
49 on interview and not to direct observation  
50  
51  
52  
53  
54  
55  
56  
57  
58  
59  
60

|    |                                                           |
|----|-----------------------------------------------------------|
| 1  |                                                           |
| 2  | <b>Rodriguez ACI et al (2020)</b>                         |
| 3  |                                                           |
| 4  | 1                                                         |
| 5  | 2                                                         |
| 6  |                                                           |
| 7  | 2                                                         |
| 8  |                                                           |
| 9  | 2                                                         |
| 10 |                                                           |
| 11 | 2                                                         |
| 12 |                                                           |
| 13 | 2                                                         |
| 14 |                                                           |
| 15 | 2                                                         |
| 16 |                                                           |
| 17 | 2                                                         |
| 18 |                                                           |
| 19 | 2                                                         |
| 20 |                                                           |
| 21 | 2                                                         |
| 22 |                                                           |
| 23 | 0                                                         |
| 24 |                                                           |
| 25 | 21                                                        |
| 26 |                                                           |
| 27 |                                                           |
| 28 | USA (2017)                                                |
| 29 |                                                           |
| 30 |                                                           |
| 31 |                                                           |
| 32 | 501                                                       |
| 33 |                                                           |
| 34 | 143 pregnant; 358 postpartum                              |
| 35 |                                                           |
| 36 |                                                           |
| 37 |                                                           |
| 38 |                                                           |
| 39 |                                                           |
| 40 |                                                           |
| 41 | Negative attitudes and unkind or disrespectful treatment; |
| 42 | comments about weight; intense focus on high-risk status  |
| 43 | and potential negative outcomes based on woman's weight;  |
| 44 | inappropriate comments                                    |
| 45 |                                                           |
| 46 |                                                           |
| 47 |                                                           |
| 48 |                                                           |
| 49 |                                                           |
| 50 |                                                           |
| 51 |                                                           |
| 52 |                                                           |
| 53 |                                                           |
| 54 |                                                           |
| 55 |                                                           |
| 56 |                                                           |
| 57 |                                                           |
| 58 |                                                           |
| 59 |                                                           |
| 60 |                                                           |

1  
2  
3  
4  
5  
6  
7  
8  
9  
10  
11  
12  
13  
14  
15  
16  
17  
18  
19  
20  
21  
22  
23  
24  
25  
26  
27  
28  
29  
30  
31  
32  
33  
34  
35  
36  
37  
38  
39  
40  
41  
42  
43  
44  
45  
46  
47  
48  
49  
50  
51  
52  
53  
54  
55  
56  
57  
58  
59  
60

Individualize approach to each woman's weight; take in mind the potential negative consequences of stigmatizing mothers for weight; compassionate care, free from stigma; stimulate breastfeeding, reduce negative expectations about breastfeeding; investigate postpartum depression symptoms

peer review only

1  
2  
3  
4 Participants who reported having changed their provider had  
5 a significantly higher pre-pregnancy BMI ( $M = 42.79 \pm 10.89$ )  
6 than those who did not ( $M = 32.92 \pm 10.91$ ),  $F(1, 478) =$   
7  $28.02$ ,  $p < 0.001$ . There was a significant difference in pre-  
8 pregnancy BMI among women who reported that too little ( $M$   
9  $= 31.29 \pm 9.19$ ), the right amount ( $M = 32.97 \pm 11.07$ ), and  
10 too much ( $M = 40.69 \pm 11.58$ ) attention was paid to their  
11 weight,  $F(2, 478) = 13.73$ ,  $p < .001$ . Post-hoc analyses  
12 revealed those reporting too much attention had a  
13 significantly higher pre-pregnancy BMI than others. Those  
14 reporting that they could not trust their provider because of  
15 weight-related treatment also had significantly higher pre-  
16 pregnancy BMIs ( $M = 40.67 \pm 10.64$ ) than those who did not  
17 ( $M = 32.78 \pm 10.97$ ),  $F(1, 479) = 24.95$ ,  $p < 0.001$ . Pregnant  
18 participants who expected that they would feel uncomfortable  
19 seeking help with breastfeeding had a marginally significantly  
20 higher pre-pregnancy BMI ( $M = 40.28 \pm 11.84$ ) than those  
21 who did not ( $M = 34.20 \pm 12.46$ ),  $F(1, 128) = 3.73$ ,  $p <$   
22  $0.056$ . For postpartum participants, those who had felt  
23 uncomfortable seeking help with breastfeeding had  
24 significantly higher pre-pregnancy BMIs ( $M = 36.01 \pm 11.76$ )  
25 than those who had not ( $M = 32.28 \pm 10.20$ ),  $F(1, 282) = 6.68$ ,  $p$   
26  $= 0.010$ .  
27  
28  
29  
30  
31  
32  
33  
34

35  
36  
37  
38  
39  
40  
41  
42  
43  
44  
45 Sample was primarily white of higher socioeconomic status,  
46 large proportion from California, did not investigate other  
47 samples (low-income and racial/ethnic minority mothers),  
48 cannot be generalized  
49  
50  
51  
52  
53  
54  
55  
56  
57  
58  
59  
60

|    |                              |
|----|------------------------------|
| 1  |                              |
| 2  |                              |
| 3  | <b>Öztürk H et al (2020)</b> |
| 4  | 2                            |
| 5  | 2                            |
| 6  |                              |
| 7  |                              |
| 8  | 2                            |
| 9  |                              |
| 10 |                              |
| 11 | 2                            |
| 12 | 2                            |
| 13 |                              |
| 14 |                              |
| 15 | 2                            |
| 16 |                              |
| 17 | 2                            |
| 18 | 2                            |
| 19 |                              |
| 20 | 2                            |
| 21 | 2                            |
| 22 |                              |
| 23 | 2                            |
| 24 |                              |
| 25 | 1                            |
| 26 |                              |
| 27 | <b>23</b>                    |
| 28 |                              |
| 29 |                              |
| 30 | Turkey (2019)                |
| 31 |                              |
| 32 |                              |
| 33 |                              |
| 34 | 707                          |
| 35 |                              |
| 36 |                              |
| 37 |                              |
| 38 | 357 patients, 350 nurses     |
| 39 |                              |
| 40 |                              |
| 41 |                              |
| 42 |                              |
| 43 |                              |
| 44 |                              |
| 45 |                              |
| 46 |                              |
| 47 |                              |
| 48 |                              |
| 49 |                              |
| 50 |                              |
| 51 |                              |
| 52 |                              |
| 53 |                              |
| 54 |                              |
| 55 |                              |
| 56 |                              |
| 57 |                              |
| 58 |                              |
| 59 |                              |
| 60 |                              |

1  
2  
3  
4  
5  
6  
7  
8  
9  
10  
11  
12  
13  
14  
15  
16  
17  
18  
19  
20  
21  
22  
23  
24  
25  
26  
27  
28  
29  
30  
31  
32  
33  
34  
35  
36  
37  
38  
39  
40  
41  
42  
43  
44  
45  
46  
47  
48  
49  
50  
51  
52  
53  
54  
55  
56  
57  
58  
59  
60

Application of Patient Privacy Scale (PPS)

To bring the discussion of patient privacy into light

For peer review only

1  
2  
3  
4  
5  
6  
7  
8  
9  
10  
11  
12  
13  
14  
15 Nurses and the patients in the public hospitals had statistically  
16 significantly higher overall privacy scores than those in the  
17 training and research hospitals. The overall privacy scale scores  
18 were higher and more statistically significant in the patients  
19 hospitalized in surgical clinics than those hospitalized in clinics for  
20 internal diseases and in single compared to married patients.  
21  
22  
23  
24  
25  
26  
27  
28  
29  
30  
31  
32  
33  
34  
35

36  
37  
38  
39  
40  
41  
42  
43  
44  
45  
46  
47 The current study was limited only to the opinions of nurses  
48 working in public hospitals in a city in Turkey and patients  
49 receiving inpatient treatment in these hospitals  
50  
51  
52  
53  
54  
55  
56  
57  
58  
59  
60

1  
2  
3  
4  
5  
6  
7  
8  
9  
10  
11  
12  
13  
14  
15  
16  
17  
18  
19  
20  
21  
22  
23  
24  
25  
26  
27  
28  
29  
30  
31  
32  
33  
34  
35  
36  
37  
38  
39  
40  
41  
42  
43  
44  
45  
46  
47  
48  
49  
50  
51  
52  
53  
54  
55  
56  
57  
58  
59  
60

|                                                                                                                                            |  |
|--------------------------------------------------------------------------------------------------------------------------------------------|--|
| <b>Ring D et al (2017)</b>                                                                                                                 |  |
| 0                                                                                                                                          |  |
| 2                                                                                                                                          |  |
| 1                                                                                                                                          |  |
| 2                                                                                                                                          |  |
| 2                                                                                                                                          |  |
| 2                                                                                                                                          |  |
| 2                                                                                                                                          |  |
| 2                                                                                                                                          |  |
| 2                                                                                                                                          |  |
| 2                                                                                                                                          |  |
| 0                                                                                                                                          |  |
| 2                                                                                                                                          |  |
| <b>19</b>                                                                                                                                  |  |
| USA (1997-2013)                                                                                                                            |  |
| 1.118                                                                                                                                      |  |
| 1,118 patients complaints                                                                                                                  |  |
| <p>Access and availability, humaneness and disrespect,<br/>communication, expectations of care and treatment, distrust and<br/>billing</p> |  |



1  
2  
3  
4  
5  
6  
7  
8  
9  
10  
11  
12  
13  
14  
15  
16  
17  
18  
19  
20  
21  
22  
23  
24  
25  
26  
27  
28  
29  
30  
31  
32  
33  
34  
35  
36  
37  
38  
39  
40  
41  
42  
43  
44  
45  
46  
47  
48  
49  
50  
51  
52  
53  
54  
55  
56  
57  
58  
59  
60

Improve patients' experiences (optimal communication strategies and costumer service), increase availability by phone or e-mail of the staff, improve communication strategies and empathy, to listen to, to respect, to make patients feel appreciated for who they are,

For peer review only

1  
2  
3  
4 Women reported more complaints in access and availability,  
5 humaneness and disrespect, and billing; patients aged 40 to 60  
6 years were more likely to file a complaint in all categories except  
7 distrust (most common in patients over age 80) and research;  
8 most complaints concerned the surgeon (58%) or the  
9 administrative assistant (32%). Over half of all complaints were  
10 related to interpersonal issues [humaneness/ disrespect (20%),  
11 expectation of care and treatment (20%), communication (14%)  
12 and distrust (3.6%)]; the most common type of complaint per year  
13 from 1997 to 2012 was access and availability except during  
14 2004 when it was humaneness/disrespect. In the access and  
15 availability category, accessibility via telephone and e-mail (34%),  
16 wait time (24%), and physical absence of clinician/cancellation of  
17 appointment (18%) were the three most common sources of  
18 complaint. Regarding the category of humaneness/ disrespect,  
19 the most common description was unprofessional (38%), then  
20 rudeness (34%), and condescending (15%). 76% of  
21 communication category complaints were attributed to  
22 miscommunication between the patient and surgeon, while care  
23 and treatment complaints involved disputes about treatment,  
24 followed by diagnostic issues, and referrals. Many treatment-  
25 related complaints addressed medication (most often opioids)  
26 and dissatisfaction with the outcome of surgery.  
27  
28  
29  
30  
31  
32  
33  
34

35  
36  
37  
38  
39  
40  
41  
42  
43  
44  
45 Limited to one hospital; underreporting of complaints, variability of  
46 complaints may be due to variability in ombusperson, patient may  
47 have the idea that complaint would not be addressed, differences  
48 in reporting by age may be due to more treating patients that  
49 ages, complaints addressed only in major negative experiences  
50  
51  
52  
53  
54  
55  
56  
57  
58  
59  
60

|    |                                           |
|----|-------------------------------------------|
| 1  |                                           |
| 2  |                                           |
| 3  | <b>Larijani B et al (2018)</b>            |
| 4  | 2                                         |
| 5  | 2                                         |
| 6  |                                           |
| 7  |                                           |
| 8  | 2                                         |
| 9  |                                           |
| 10 |                                           |
| 11 | 2                                         |
| 12 | 2                                         |
| 13 | 2                                         |
| 14 |                                           |
| 15 | 2                                         |
| 16 |                                           |
| 17 | 2                                         |
| 18 | 2                                         |
| 19 |                                           |
| 20 | 2                                         |
| 21 | 2                                         |
| 22 |                                           |
| 23 | 2                                         |
| 24 |                                           |
| 25 | 0                                         |
| 26 |                                           |
| 27 | <b>22</b>                                 |
| 28 |                                           |
| 29 |                                           |
| 30 | Iran (2010)                               |
| 31 |                                           |
| 32 |                                           |
| 33 |                                           |
| 34 | 200                                       |
| 35 |                                           |
| 36 |                                           |
| 37 |                                           |
| 38 |                                           |
| 39 | 200 patients from two hospitals in Tehran |
| 40 |                                           |
| 41 |                                           |
| 42 |                                           |
| 43 |                                           |
| 44 |                                           |
| 45 |                                           |
| 46 |                                           |
| 47 |                                           |
| 48 |                                           |
| 49 |                                           |
| 50 |                                           |
| 51 |                                           |
| 52 |                                           |
| 53 |                                           |
| 54 |                                           |
| 55 |                                           |
| 56 |                                           |
| 57 |                                           |
| 58 |                                           |
| 59 |                                           |
| 60 |                                           |

1  
2  
3  
4  
5  
6  
7  
8  
9  
10  
11  
12  
13  
14  
15 Two-part questionnaire administered by two interviewers  
16  
17  
18  
19  
20  
21  
22  
23  
24  
25  
26  
27  
28  
29  
30  
31  
32  
33  
34  
35  
36  
37  
38  
39  
40  
41  
42  
43  
44  
45  
46  
47  
48  
49  
50  
51  
52  
53  
54  
55  
56  
57  
58  
59  
60

Train and observe confidentiality and privacy issues, to promote the observance of patients' rights; both healthcare providers and recipients be informed about these issues; education may be provided upon admission or at any other appropriate time via provision of oral explanation as well as written media such as pamphlets, brochures, booklets, etc.; Health policy makers should develop and implement a plan for raising patients' awareness of privacy and confidentiality to improve physician-patient relationships;

1  
2  
3  
4  
5 153 patients provided a correct definition of privacy, and 161 patients were  
6 aware of instances of privacy violation; 77 patients had good awareness of  
7 physician confidentiality, 46 patients believed that physicians could disclose  
8 patients' information to reduce or eliminate a significant risk of serious harm  
9 to others, 47 patients did not think it was necessary for physicians to obtain  
10 patients' consent before consulting with their families, 105 patients did not  
11 believe that physicians needed patients' permission to consult with their  
12 colleagues or other members of the medical team in cases of multidisciplinary  
13 diagnosis and treatment, 28 patients were aware that disclosing patient's  
14 information is unethical, against religion, and illegal, 113 patients had  
15 previously known that medical information pertaining to mentally retarded  
16 patients should be recounted to their parents or guardians, 39 patients did not  
17 consider the results of medical examinations and tests as confidential in  
18 cases where patient security, employment, insurance issues and legal  
19 competency were concerned, and 47 patients were not aware that in  
20 research studies it is essential not to disclose patients' identity, 158 patients  
21 had good awareness of the confidentiality of examination results and medical  
22 consultations; 15 patients were not aware that in case of patients' decision to  
23 commit suicide or homicide, physicians must inform the relevant authorities;  
24 whether male physicians should be allowed to perform physical examinations  
25 on female patients, 81 patients answered that they should, where it was a  
26 matter of saving lives. It may therefore be concluded that they had a good  
27 level of awareness in this regard  
28  
29  
30  
31  
32  
33  
34  
35

36  
37  
38  
39  
40  
41  
42  
43  
44  
45  
46  
47  
48 The authors did not state the limitations of this study  
49  
50  
51  
52  
53  
54  
55  
56  
57  
58  
59  
60

1  
2  
3  
4  
5  
6  
7  
8  
9  
10  
11  
12  
13  
14  
15  
16  
17  
18  
19  
20  
21  
22  
23  
24  
25  
26  
27  
28  
29  
30  
31  
32  
33  
34  
35  
36  
37  
38  
39  
40  
41  
42  
43  
44  
45  
46  
47  
48  
49  
50  
51  
52  
53  
54  
55  
56  
57  
58  
59  
60

|                                                                                                                                                                                                                                          |  |
|------------------------------------------------------------------------------------------------------------------------------------------------------------------------------------------------------------------------------------------|--|
| <b>Ma CC (2014)</b>                                                                                                                                                                                                                      |  |
| 2                                                                                                                                                                                                                                        |  |
| 2                                                                                                                                                                                                                                        |  |
| 2                                                                                                                                                                                                                                        |  |
| 1                                                                                                                                                                                                                                        |  |
| 1                                                                                                                                                                                                                                        |  |
| 1                                                                                                                                                                                                                                        |  |
| 2                                                                                                                                                                                                                                        |  |
| 1                                                                                                                                                                                                                                        |  |
| 1                                                                                                                                                                                                                                        |  |
| 1                                                                                                                                                                                                                                        |  |
| 2                                                                                                                                                                                                                                        |  |
| 2                                                                                                                                                                                                                                        |  |
| <b>18</b>                                                                                                                                                                                                                                |  |
| Taiwan (2012)                                                                                                                                                                                                                            |  |
| 204                                                                                                                                                                                                                                      |  |
| 204 patients > 18 years-old                                                                                                                                                                                                              |  |
| <p>To evaluate patient's concerns about privacy of EMRs data; to evaluate patient's behavioural responses of patients to their perception of information privacy concerns resulting from information practices of medical facilities</p> |  |

1  
2  
3  
4  
5  
6  
7  
8  
9  
10  
11  
12  
13  
14  
15  
16  
17  
18  
19  
20  
21  
22  
23  
24  
25  
26  
27  
28  
29  
30  
31  
32  
33  
34  
35  
36  
37  
38  
39  
40  
41  
42  
43  
44  
45  
46  
47  
48  
49  
50  
51  
52  
53  
54  
55  
56  
57  
58  
59  
60

Institutions and governments need to ensure data protection to each individual; to protect data from use without patient's consent; to develop privacy protection policies to reduce patient's privacy information concerns

For peer review only

1  
2  
3  
4  
5  
6  
7  
8  
9  
10  
11 Collection of information, secondary use of information and errors in data  
12 collection were primary factors in arousing patients' information privacy  
13 protective responses toward electronic medical records (EMRs); governments  
14 and medical facilities should focus on these findings and develop EMR  
15 privacy protection policies to reduce people's information privacy concerns;  
16 patients took protective responses towards EMRs when their information  
17 privacy concerns were invaded; the lack of attention to these relationships in  
18 the healthcare context is problematic because of the influence of these  
19 relationships on the promotion of EMRs in the future; the development of  
20 EMRs by those responsible for formulating and implementing information-  
21 privacy protection procedures in organisational and societal contexts is  
22 needed.  
23  
24  
25  
26  
27  
28  
29  
30  
31  
32  
33  
34

35  
36  
37  
38  
39  
40 This study only looked at people who access Electronic Medical Records  
41 (EMRs) without authorisation as staff at the medical facility, which might  
42 ignore other unauthorised access by individuals not associated with the  
43 medical facility. Further, the external validity of the findings may be limited as  
44 the sample was collected from one hospital in Taiwan only. Consequently,  
45 inferences to other populations cannot be made safely. However, the  
46 collected sample possessed certain demographic characteristic (e.g. gender)  
47 in the same proportion as the Taiwanese population, although there were  
48 some differences in age and education, meaning that these results may be  
49 generalisable to other Taiwanese hospitals. Future research could expand on  
50 the present study's findings by using a more representative sample in other  
51 geographical settings.  
52  
53  
54  
55  
56  
57  
58  
59  
60



| CRITICAL APPRAISAL SCORES                              |                                     |                               |                                                                                   |
|--------------------------------------------------------|-------------------------------------|-------------------------------|-----------------------------------------------------------------------------------|
| Individual item score (color and value)                |                                     |                               | (a) Did not cite explicitly the data collection date/time frame (e.g. month/year) |
| 0 = not or inadequately addressed or applied           | 1 = adequately addressed or applied | 2 = well addressed or applied |                                                                                   |
| Total Score Appraisal by study design, color and value |                                     |                               |                                                                                   |
|                                                        | Low quality                         | Moderate quality              | High quality                                                                      |
| Qualitative studies                                    | 0-7                                 | 8-14                          | 15-20                                                                             |
| Cross-sectional studies                                | 0-9                                 | 10-17                         | 18-24                                                                             |
| Cohort study                                           | 0-9                                 | 10-17                         | 18-24                                                                             |
| Quali-quantitative and convergent parallel mixed-      | 0-4                                 | 5-9                           | 10-14                                                                             |

|  |                                                       |
|--|-------------------------------------------------------|
|  |                                                       |
|  |                                                       |
|  | <b>Issue</b>                                          |
|  | <b>Recruitment</b>                                    |
|  | <b>Exposure</b>                                       |
|  | <b>Outcome</b>                                        |
|  | <b>Confounding factors identification</b>             |
|  | <b>Confounding factors taken into account</b>         |
|  | <b>Follow up complete</b>                             |
|  | <b>Follow up long enough</b>                          |
|  | <b>Results</b>                                        |
|  | <b>Precision of the results</b>                       |
|  | <b>Believe the results</b>                            |
|  | <b>Results applied</b>                                |
|  | <b>Results fit</b>                                    |
|  | <b>Implications for practice</b>                      |
|  | <b>Total</b>                                          |
|  | <b>Country (year of research and data collection)</b> |
|  | <b>Sample size</b>                                    |
|  | <b>Type of samples</b>                                |

raisal Skills Programme)

1  
2  
3  
4  
5  
6  
7  
8  
9  
10  
11  
12  
13  
14  
15  
16  
17  
18  
19  
20  
21  
22  
23  
24  
25  
26  
27  
28  
29  
30  
31  
32  
33  
34  
35  
36  
37  
38  
39  
40  
41  
42  
43  
44  
45  
46  
47  
48  
49  
50  
51  
52  
53  
54  
55  
56  
57  
58  
59  
60

**Table 3 - CASP Cohort Studies Checklist (Critical Appraisal)**

|                                                                  |
|------------------------------------------------------------------|
| <b>STRATEGIES, BEHAVIORS<br/>AND/OR OUTCOMES OF<br/>INTEREST</b> |
| <b>INTERVENTIONS<br/>TO ACHIEVE<br/>IMPROVEMENTS</b>             |
| <b>RESULTS</b>                                                   |

For peer review only

1  
2  
3  
4  
5  
6  
7  
8  
9  
10  
11  
12  
13  
14  
15  
16  
17  
18  
19  
20  
21  
22  
23  
24  
25  
26  
27  
28  
29  
30  
31  
32  
33  
34  
35  
36  
37  
38  
39  
40  
41  
42  
43  
44  
45  
46  
47  
48  
49  
50  
51  
52  
53  
54  
55  
56  
57  
58  
59  
60

|  |                    |
|--|--------------------|
|  | <b>LIMITATIONS</b> |
|--|--------------------|

For peer review only

|    |                                                                      |
|----|----------------------------------------------------------------------|
| 1  |                                                                      |
| 2  |                                                                      |
| 3  | <b>Skyman E et al (2014)</b>                                         |
| 4  | 2                                                                    |
| 5  | 2                                                                    |
| 6  | 2                                                                    |
| 7  |                                                                      |
| 8  |                                                                      |
| 9  | 2                                                                    |
| 10 |                                                                      |
| 11 |                                                                      |
| 12 |                                                                      |
| 13 | 1                                                                    |
| 14 |                                                                      |
| 15 |                                                                      |
| 16 |                                                                      |
| 17 | 1                                                                    |
| 18 |                                                                      |
| 19 |                                                                      |
| 20 |                                                                      |
| 21 | 2                                                                    |
| 22 |                                                                      |
| 23 |                                                                      |
| 24 | 2                                                                    |
| 25 |                                                                      |
| 26 | 2                                                                    |
| 27 |                                                                      |
| 28 | 2                                                                    |
| 29 |                                                                      |
| 30 |                                                                      |
| 31 | 2                                                                    |
| 32 |                                                                      |
| 33 | 1                                                                    |
| 34 | 1                                                                    |
| 35 |                                                                      |
| 36 | 1                                                                    |
| 37 |                                                                      |
| 38 | <b>23</b>                                                            |
| 39 |                                                                      |
| 40 |                                                                      |
| 41 | Sweden (2004/2011)                                                   |
| 42 |                                                                      |
| 43 |                                                                      |
| 44 | 202                                                                  |
| 45 |                                                                      |
| 46 |                                                                      |
| 47 | 2004: 92 patients (Card: 71, No card: 21); 2011: 110 patients (Card: |
| 48 | 91, No card: 19)                                                     |
| 49 |                                                                      |
| 50 |                                                                      |
| 51 |                                                                      |
| 52 |                                                                      |
| 53 |                                                                      |
| 54 |                                                                      |
| 55 |                                                                      |
| 56 |                                                                      |
| 57 |                                                                      |
| 58 |                                                                      |
| 59 |                                                                      |
| 60 |                                                                      |

1  
2  
3  
4  
5  
6  
7 Disrespect and humiliation, Lack of knowledge, Unprofessionalism,  
8 Responsibility not to spreading MRSA  
9  
10  
11  
12  
13  
14  
15

16  
17 To reduce uncertainty, offence, anger and discrimination; to educate  
18 patients and healthcare workers; to inform patients and health care  
19 providers; to manage patients feelings ; to preserve patients' dignity; to  
20 educate health care providers  
21  
22  
23  
24

25  
26  
27 Patients felt pointed out in a negative way by receiving a notification  
28 card; a majority reported that they always or almost always had shown  
29 the card when seeking hospital or outpatient care, and for dental care  
30 the number was significantly higher in 2011 (57.14%) than in 2004  
31 (30.98%) ( $p=0.004$ ); 81% stated that it is good to have a card in 2004,  
32 and 62% in 2011; 38% reported health care workers (HCW) were  
33 familiar with the card in 2004, and it increased significantly (45%) in  
34 2011 ( $p=0.036$ ); patients reporting HCW took no notice of the card  
35 (21% in 2004, 11% in 2011,  $p=0.004$ ). Very few actively stated that the  
36 HCW were unfamiliar with the card (15.5% in 2004, 5.5% in 2011,  
37  $p=0.036$ ). Almost half of the patients indicated positive reactions when  
38 presenting the notification card (45% in 2004, 47.2% in 2011,  $p=0.445$ ).  
39 A higher number however, responded that they were met with despair  
40 and fear (9.86% in 2004, 34% in 2011,  $p=0.052$ ). Patients claimed  
41 unknown acquisition (70% in 2004), of whom 75% believed wrongly  
42 that they had been infected in the hospital. In 2011, there was a  
43 tendency towards increased unawareness (47.27%), as compared to  
44 2004, but the difference was not significant. The dominant  
45 misconception was still hospital acquisition (81%), even though the  
46 perceived hospital acquired-MRSA rate decreased significantly (19% in  
47 2011, 42.4% in 2004,  $p<0.001$ ). Few stated community acquisition in  
48 both groups (5% and 21%).  
49  
50  
51  
52  
53  
54  
55  
56  
57  
58  
59  
60

1  
2  
3  
4  
5  
6  
7  
8  
9  
10  
11  
12  
13  
14  
15  
16  
17  
18  
19  
20  
21  
22  
23  
24  
25  
26  
27  
28  
29  
30  
31  
32  
33  
34  
35  
36  
37  
38  
39  
40  
41  
42  
43  
44  
45  
46  
47  
48  
49  
50  
51  
52  
53  
54  
55  
56  
57  
58  
59  
60

Low response rates, patients with negative experiences may be more willing to to respond

For peer review only

| CRITICAL APPRAISAL SCORES                                       |                                     |                               |                                                                                   |
|-----------------------------------------------------------------|-------------------------------------|-------------------------------|-----------------------------------------------------------------------------------|
| Individual item score (color and value)                         |                                     |                               | (a) Did not cite explicitly the data collection date/time frame (e.g. month/year) |
| 0 = not or inadequately addressed or applied                    | 1 = adequately addressed or applied | 2 = well addressed or applied |                                                                                   |
| Total Score Appraisal by study design, color and value          |                                     |                               |                                                                                   |
|                                                                 | Low quality                         | Moderate quality              | High quality                                                                      |
| Qualitative studies                                             | 0-7                                 | 8-14                          | 15-20                                                                             |
| Cross-sectional studies                                         | 0-9                                 | 10-17                         | 18-24                                                                             |
| Cohort study                                                    | 0-9                                 | 10-17                         | 18-24                                                                             |
| Quali-quantitative and convergent parallel mixed-method studies | 0-4                                 | 5-9                           | 10-14                                                                             |



|                                                                             |                                                       |                                                                                                                             |
|-----------------------------------------------------------------------------|-------------------------------------------------------|-----------------------------------------------------------------------------------------------------------------------------|
| <b>ia (Quali-quantitative and convergent parallel mixed-method studies)</b> |                                                       | <b>Sanson G <i>et al</i> (2020)</b>                                                                                         |
|                                                                             | <b>Worth or relevance</b>                             | 2                                                                                                                           |
|                                                                             | <b>Clear question</b>                                 | 2                                                                                                                           |
|                                                                             | <b>Design</b>                                         | 2                                                                                                                           |
|                                                                             | <b>Context</b>                                        | 2                                                                                                                           |
|                                                                             | <b>Sampling</b>                                       | 1                                                                                                                           |
|                                                                             | <b>Data collection and analysis</b>                   | 1                                                                                                                           |
|                                                                             | <b>Reflexivity</b>                                    | 2                                                                                                                           |
|                                                                             | <b>Total</b>                                          | <b>12</b>                                                                                                                   |
|                                                                             | <b>Country (year of research and data collection)</b> | Italy (2015)                                                                                                                |
|                                                                             | <b>Sample size</b>                                    | 100                                                                                                                         |
|                                                                             | <b>Type of samples</b>                                | 100 Intensive Care Unit (ICU) patients                                                                                      |
|                                                                             | <b>STRATEGIES/BEHAVIOR S/OUTCOMES OF INTEREST</b>     | To identify perceptions about the ICU environment; to reduce discomfort of tubes and procedures, room temperature, position |

1  
2  
3  
4  
5  
6  
7  
8  
9  
10  
11  
12  
13  
14  
15  
16  
17  
18  
19  
20  
21  
22  
23  
24  
25  
26  
27  
28  
29  
30  
31  
32  
33  
34  
35  
36  
37  
38  
39  
40  
41  
42  
43  
44  
45  
46  
47  
48  
49  
50  
51  
52  
53  
54  
55  
56  
57  
58  
59  
60

Critical Appraisal according to Mays & Pope (2000) Criter

|                                                     |                                                                                                                                                                                                                                                                                                                                                                                                                                                                                                |
|-----------------------------------------------------|------------------------------------------------------------------------------------------------------------------------------------------------------------------------------------------------------------------------------------------------------------------------------------------------------------------------------------------------------------------------------------------------------------------------------------------------------------------------------------------------|
| <p><b>INTERVENTIONS TO ACHIEVE IMPROVEMENTS</b></p> | <p>Environmental control to reduce disstress, to allow more time for family visits for some patients and less for others, clock visible to all patients, windows (daylight and night), to explain ICU bans and rules to patients; Pain control, change positions, manage visual fields</p>                                                                                                                                                                                                     |
| <p><b>RESULTS</b></p>                               | <p>Patients reported that they had a clear remembrance of their ICU stay; the patients with no clear memory of their ICU stay had significantly worse, and a longer lenght of mechanical ventilation and ICU stay; intrusive memories related to their stays in the ICU.</p>                                                                                                                                                                                                                   |
| <p><b>LIMITATIONS</b></p>                           | <p>Using a data saturation method has been questioned, because it could introduce a certain degree of uncertainty and ambiguity when it tries to find the unobserved on the basis of what is observed.</p> <p>The study enrolled vulnerable participants, some of which had a partial recollection of their ICU experiences. The interviews were carried out in hospital and the interviewer was a health care professional; this situation may have influenced the participants' answers.</p> |

| <b>Santos LR <i>et al</i> (2005) (a)</b>                                                                                                                                                                                                                                                                                                               |   |
|--------------------------------------------------------------------------------------------------------------------------------------------------------------------------------------------------------------------------------------------------------------------------------------------------------------------------------------------------------|---|
| 2                                                                                                                                                                                                                                                                                                                                                      | 2 |
| 2                                                                                                                                                                                                                                                                                                                                                      | 2 |
| 2                                                                                                                                                                                                                                                                                                                                                      | 2 |
| 2                                                                                                                                                                                                                                                                                                                                                      | 2 |
| 1                                                                                                                                                                                                                                                                                                                                                      | 1 |
| 2                                                                                                                                                                                                                                                                                                                                                      | 2 |
| 1                                                                                                                                                                                                                                                                                                                                                      | 1 |
| <b>12</b>                                                                                                                                                                                                                                                                                                                                              |   |
| Brazil (??)                                                                                                                                                                                                                                                                                                                                            |   |
| 73                                                                                                                                                                                                                                                                                                                                                     |   |
| 73 general hospital inpatients                                                                                                                                                                                                                                                                                                                         |   |
| Satisfaction with the service provided;<br>Requesting authorization for<br>administering medication and carrying out<br>exams, as well as providing prior<br>information; communication of tests<br>results; clarification about the diagnosis;<br>participation in the choice of treatment;<br>problems experienced or observed in the<br>institution |   |

| CRITICAL APPRAISAL S                                            |                                     |                               |
|-----------------------------------------------------------------|-------------------------------------|-------------------------------|
| Individual item score (color and value)                         |                                     |                               |
| 0 = not or inadequately addressed or applied                    | 1 = adequately addressed or applied | 2 = well addressed or applied |
| Total Score Appraisal by study desi                             |                                     |                               |
|                                                                 |                                     | Low quality                   |
| Qualitative studies                                             |                                     | 0-7                           |
| Cross-sectional studies                                         |                                     | 0-9                           |
| Cohort study                                                    |                                     | 0-9                           |
| Quali-quantitative and convergent parallel mixed-method studies |                                     | 0-4                           |

1  
2  
3 To ask for patients' authorization to  
4 examine them, to touch; to explain the  
5 procedure/exam; to discuss its  
6 indications, options, and risks; to give  
7 information about the patients' rights,  
8 conditions, the function of medications, to  
9 clarify their doubts; to allow patients to  
10 decide what is best for them; to use clear  
11 and understandable language when  
12 talking to patients  
13  
14  
15

16  
17 Patients who were interviewed did not  
18 receive information about the function of  
19 the medication they were given; they  
20 were not asked to or were not informed  
21 about procedures; they did not receive  
22 any information about consent and were  
23 not asked to consent; they were not  
24 asked about the route of administering  
25 their medication by the physician  
26  
27  
28  
29

30  
31  
32  
33  
34  
35  
36  
37  
38 Small sample, limited geographic area,  
39 data collection time frame not cited  
40  
41  
42  
43  
44  
45  
46  
47  
48  
49  
50

1  
2  
3  
4  
5  
6  
7  
8  
9  
10  
11  
12  
13  
14  
15  
16  
17  
18  
19  
20  
21  
22  
23  
24  
25  
26  
27  
28  
29  
30  
31  
32  
33  
34  
35  
36  
37  
38  
39  
40  
41  
42  
43  
44  
45  
46  
47  
48  
49  
50  
51  
52  
53  
54  
55  
56  
57  
58  
59  
60

| SCORES                                                                            |              |
|-----------------------------------------------------------------------------------|--------------|
| (a) Did not cite explicitly the data collection date/time frame (e.g. month/year) |              |
| Sign, color and value                                                             |              |
| Moderate quality                                                                  | High quality |
| 8-14                                                                              | 15-20        |
| 10-17                                                                             | 18-24        |
| 10-17                                                                             | 18-24        |
| 5-9                                                                               | 10-14        |

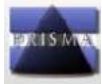

## PRISMA 2020 for Abstracts Checklist

| Section and Topic       | Item # | Checklist item                                                                                                                                                                                                                                                                                        | Reported (Yes/No) |
|-------------------------|--------|-------------------------------------------------------------------------------------------------------------------------------------------------------------------------------------------------------------------------------------------------------------------------------------------------------|-------------------|
| <b>TITLE</b>            |        |                                                                                                                                                                                                                                                                                                       |                   |
| Title                   | 1      | Identify the report as a systematic review.                                                                                                                                                                                                                                                           | Page 2 - Yes      |
| <b>BACKGROUND</b>       |        |                                                                                                                                                                                                                                                                                                       |                   |
| Objectives              | 2      | Provide an explicit statement of the main objective(s) or question(s) the review addresses.                                                                                                                                                                                                           | Page 2 - Yes      |
| <b>METHODS</b>          |        |                                                                                                                                                                                                                                                                                                       |                   |
| Eligibility criteria    | 3      | Specify the inclusion and exclusion criteria for the review.                                                                                                                                                                                                                                          | Page 2 - Yes      |
| Information sources     | 4      | Specify the information sources (e.g. databases, registers) used to identify studies and the date when each was last searched.                                                                                                                                                                        | Page 2 - Yes      |
| Risk of bias            | 5      | Specify the methods used to assess risk of bias in the included studies.                                                                                                                                                                                                                              | Page 2 - Yes      |
| Synthesis of results    | 6      | Specify the methods used to present and synthesise results.                                                                                                                                                                                                                                           | Page 2 - Yes      |
| <b>RESULTS</b>          |        |                                                                                                                                                                                                                                                                                                       |                   |
| Included studies        | 7      | Give the total number of included studies and participants and summarise relevant characteristics of studies.                                                                                                                                                                                         | Page 2 - Yes      |
| Synthesis of results    | 8      | Present results for main outcomes, preferably indicating the number of included studies and participants for each. If meta-analysis was done, report the summary estimate and confidence/credible interval. If comparing groups, indicate the direction of the effect (i.e. which group is favoured). | Page 2 - Yes      |
| <b>DISCUSSION</b>       |        |                                                                                                                                                                                                                                                                                                       |                   |
| Limitations of evidence | 9      | Provide a brief summary of the limitations of the evidence included in the review (e.g. study risk of bias, inconsistency and imprecision).                                                                                                                                                           | Page 2 - Yes      |
| Interpretation          | 10     | Provide a general interpretation of the results and important implications.                                                                                                                                                                                                                           | Page 2 - Yes      |
| <b>OTHER</b>            |        |                                                                                                                                                                                                                                                                                                       |                   |
| Funding                 | 11     | Specify the primary source of funding for the review.                                                                                                                                                                                                                                                 | Page 2 - Yes      |
| Registration            | 12     | Provide the register name and registration number.                                                                                                                                                                                                                                                    | Page 2 - Yes      |

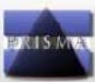

# PRISMA 2020 for Abstracts Checklist

1  
2  
3  
4  
5  
6  
7  
8  
9  
10  
11  
12  
13  
14  
15  
16  
17  
18  
19  
20  
21  
22  
23  
24  
25  
26  
27  
28  
29  
30  
31  
32  
33  
34  
35  
36  
37  
38  
39  
40  
41  
42  
43  
44  
45  
46  
47

*From:* Page MJ, McKenzie JE, Bossuyt PM, Boutron I, Hoffmann TC, Mulrow CD, et al. The PRISMA 2020 statement: an updated guideline for reporting systematic reviews. *BMJ* 2021;372:n71. doi: 10.1136/bmj.n71

For more information, visit: <http://www.prisma-statement.org/>

For peer review only



## PRISMA 2020 Checklist

| Section and Topic             | Item # | Checklist item                                                                                                                                                                                                                                                                                       | Location where item is reported |
|-------------------------------|--------|------------------------------------------------------------------------------------------------------------------------------------------------------------------------------------------------------------------------------------------------------------------------------------------------------|---------------------------------|
| <b>TITLE</b>                  |        |                                                                                                                                                                                                                                                                                                      |                                 |
| Title                         | 1      | Identify the report as a systematic review.                                                                                                                                                                                                                                                          | Page 2                          |
| <b>ABSTRACT</b>               |        |                                                                                                                                                                                                                                                                                                      |                                 |
| Abstract                      | 2      | See the PRISMA 2020 for Abstracts checklist.                                                                                                                                                                                                                                                         | Page 2                          |
| <b>INTRODUCTION</b>           |        |                                                                                                                                                                                                                                                                                                      |                                 |
| Rationale                     | 3      | Describe the rationale for the review in the context of existing knowledge.                                                                                                                                                                                                                          | Page 2-3                        |
| Objectives                    | 4      | Provide an explicit statement of the objective(s) or question(s) the review addresses.                                                                                                                                                                                                               | Page 3                          |
| <b>METHODS</b>                |        |                                                                                                                                                                                                                                                                                                      |                                 |
| Eligibility criteria          | 5      | Specify the inclusion and exclusion criteria for the review and how studies were grouped for the syntheses.                                                                                                                                                                                          | Page 3                          |
| Information sources           | 6      | Specify all databases, registers, websites, organisations, reference lists and other sources searched or consulted to identify studies. Specify the date when each source was last searched or consulted.                                                                                            | Page 3                          |
| Search strategy               | 7      | Present the full search strategies for all databases, registers and websites, including any filters and limits used.                                                                                                                                                                                 | Page 3                          |
| Selection process             | 8      | Specify the methods used to decide whether a study met the inclusion criteria of the review, including how many reviewers screened each record and each report retrieved, whether they worked independently, and if applicable, details of automation tools used in the process.                     | Page 3                          |
| Data collection process       | 9      | Specify the methods used to collect data from reports, including how many reviewers collected data from each report, whether they worked independently, any processes for obtaining or confirming data from study investigators, and if applicable, details of automation tools used in the process. | Page 3                          |
| Data items                    | 10a    | List and define all outcomes for which data were sought. Specify whether all results that were compatible with each outcome domain in each study were sought (e.g. for all measures, time points, analyses), and if not, the methods used to decide which results to collect.                        | Page 3                          |
|                               | 10b    | List and define all other variables for which data were sought (e.g. participant and intervention characteristics, funding sources). Describe any assumptions made about any missing or unclear information.                                                                                         | Page 3                          |
| Study risk of bias assessment | 11     | Specify the methods used to assess risk of bias in the included studies, including details of the tool(s) used, how many reviewers assessed each study and whether they worked independently, and if applicable, details of automation tools used in the process.                                    | Pages 3 and 11                  |
| Effect measures               | 12     | Specify for each outcome the effect measure(s) (e.g. risk ratio, mean difference) used in the synthesis or presentation of results.                                                                                                                                                                  | Not applicable                  |
| Synthesis methods             | 13a    | Describe the processes used to decide which studies were eligible for each synthesis (e.g. tabulating the study intervention characteristics and comparing against the planned groups for each synthesis (item #5)).                                                                                 | Page 3                          |
|                               | 13b    | Describe any methods required to prepare the data for presentation or synthesis, such as handling of missing summary statistics, or data conversions.                                                                                                                                                | Page 3                          |
|                               | 13c    | Describe any methods used to tabulate or visually display results of individual studies and syntheses.                                                                                                                                                                                               | Page 3                          |
|                               | 13d    | Describe any methods used to synthesize results and provide a rationale for the choice(s). If meta-analysis was performed, describe the model(s), method(s) to identify the presence and extent of statistical heterogeneity, and software package(s) used.                                          | Pages 3-6, and pages 8-11       |
|                               | 13e    | Describe any methods used to explore possible causes of heterogeneity among study results (e.g. subgroup analysis, meta-regression).                                                                                                                                                                 | Pages 3-4                       |
|                               | 13f    | Describe any sensitivity analyses conducted to assess robustness of the synthesized results.                                                                                                                                                                                                         | Pages 3, 4, 8                   |
| Reporting bias                | 14     | Describe any methods used to assess risk of bias due to missing results in a synthesis (arising from reporting biases).                                                                                                                                                                              | Pages 3, 11                     |



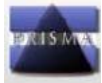

## PRISMA 2020 Checklist

1  
2  
3  
4  
5  
6  
7  
8  
9  
10  
11  
12  
13  
14  
15  
16  
17  
18  
19  
20  
21  
22  
23  
24  
25  
26  
27  
28  
29  
30  
31  
32  
33  
34  
35  
36  
37  
38  
39  
40  
41  
42  
43  
44  
45  
46  
47

| Section and Topic             | Item # | Checklist item                                                                                                                                                                                                                                                                       | Location where item is reported |
|-------------------------------|--------|--------------------------------------------------------------------------------------------------------------------------------------------------------------------------------------------------------------------------------------------------------------------------------------|---------------------------------|
| assessment                    |        |                                                                                                                                                                                                                                                                                      |                                 |
| Certainty assessment          | 15     | Describe any methods used to assess certainty (or confidence) in the body of evidence for an outcome.                                                                                                                                                                                | Page 8                          |
| <b>RESULTS</b>                |        |                                                                                                                                                                                                                                                                                      |                                 |
| Study selection               | 16a    | Describe the results of the search and selection process, from the number of records identified in the search to the number of studies included in the review, ideally using a flow diagram.                                                                                         | Pages 3,4                       |
|                               | 16b    | Cite studies that might appear to meet the inclusion criteria, but which were excluded, and explain why they were excluded.                                                                                                                                                          | Page 4                          |
| Study characteristics         | 17     | Cite each included study and present its characteristics.                                                                                                                                                                                                                            | Page 4-6                        |
| Risk of bias in studies       | 18     | Present assessments of risk of bias for each included study.                                                                                                                                                                                                                         | Page 11                         |
| Results of individual studies | 19     | For all outcomes, present, for each study: (a) summary statistics for each group (where appropriate) and (b) an effect estimate and its precision (e.g. confidence/credible interval), ideally using structured tables or plots.                                                     | Pages 3-8                       |
| Results of syntheses          | 20a    | For each synthesis, briefly summarise the characteristics and risk of bias among contributing studies.                                                                                                                                                                               | Page 11                         |
|                               | 20b    | Present results of all statistical syntheses conducted. If meta-analysis was done, present for each the summary estimate and its precision (e.g. confidence/credible interval) and measures of statistical heterogeneity. If comparing groups, describe the direction of the effect. | Not applicable                  |
|                               | 20c    | Present results of all investigations of possible causes of heterogeneity among study results.                                                                                                                                                                                       | Page 13                         |
|                               | 20d    | Present results of all sensitivity analyses conducted to assess the robustness of the synthesized results.                                                                                                                                                                           | Pages 8-11                      |
| Reporting biases              | 21     | Present assessments of risk of bias due to missing results (arising from reporting biases) for each synthesis assessed.                                                                                                                                                              | Page 4, 13                      |
| Certainty of evidence         | 22     | Present assessments of certainty (or confidence) in the body of evidence for each outcome assessed.                                                                                                                                                                                  | Pages 8-11                      |
| <b>DISCUSSION</b>             |        |                                                                                                                                                                                                                                                                                      |                                 |
| Discussion                    | 23a    | Provide a general interpretation of the results in the context of other evidence.                                                                                                                                                                                                    | Pages 11-13                     |
|                               | 23b    | Discuss any limitations of the evidence included in the review.                                                                                                                                                                                                                      | Page 13                         |
|                               | 23c    | Discuss any limitations of the review processes used.                                                                                                                                                                                                                                | Page 13                         |
|                               | 23d    | Discuss implications of the results for practice, policy, and future research.                                                                                                                                                                                                       | Pages 13, 14                    |
| <b>OTHER INFORMATION</b>      |        |                                                                                                                                                                                                                                                                                      |                                 |
| Registration and protocol     | 24a    | Provide registration information for the review, including register name and registration number, or state that the review was not registered.                                                                                                                                       | Pages 2, 3, 14                  |
|                               | 24b    | Indicate where the review protocol can be accessed, or state that a protocol was not prepared.                                                                                                                                                                                       | PROSPERO                        |
|                               | 24c    | Describe and explain any amendments to information provided at registration or in the protocol.                                                                                                                                                                                      | None                            |
| Support                       | 25     | Describe sources of financial or non-financial support for the review, and the role of the funders or sponsors in the review.                                                                                                                                                        | Page 14                         |
| Competing interests           | 26     | Declare any competing interests of review authors.                                                                                                                                                                                                                                   | Page 14                         |

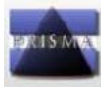

## PRISMA 2020 Checklist

| Section and Topic                              | Item # | Checklist item                                                                                                                                                                                                                             | Location where item is reported |
|------------------------------------------------|--------|--------------------------------------------------------------------------------------------------------------------------------------------------------------------------------------------------------------------------------------------|---------------------------------|
| Availability of data, code and other materials | 27     | Report which of the following are publicly available and where they can be found: template data collection forms; data extracted from included studies; data used for all analyses; analytic code; any other materials used in the review. | Not applicable                  |

From: Page MJ, McKenzie JE, Bossuyt PM, Boutron I, Hoffmann TC, Mulrow CD, et al. The PRISMA 2020 statement: an updated guideline for reporting systematic reviews. *BMJ* 2021;372:n71. doi: 10.1136/bmj.n71

For more information, visit: <http://www.prisma-statement.org/>

For peer review only

# BMJ Open

## Improving the perception of respect for and the dignity of inpatients: A Systematic Review

|                                 |                                                                                                                                                                                                                    |
|---------------------------------|--------------------------------------------------------------------------------------------------------------------------------------------------------------------------------------------------------------------|
| Journal:                        | <i>BMJ Open</i>                                                                                                                                                                                                    |
| Manuscript ID                   | bmjopen-2021-059129.R2                                                                                                                                                                                             |
| Article Type:                   | Original research                                                                                                                                                                                                  |
| Date Submitted by the Author:   | 12-Apr-2022                                                                                                                                                                                                        |
| Complete List of Authors:       | E. P. Dutra, Pablo; UFRJ, Institute of Pyschiatry of UFRJ (IPUB/UFRJ)<br>Quagliato, Laiana; UFRJ, Institute of Psychiatry of UFRJ (IPUB/UFRJ)<br>Nardi, Antonio; UFRJ, Institute of Psychiatry of UFRJ (IPUB/UFRJ) |
| <b>Primary Subject Heading</b>: | Mental health                                                                                                                                                                                                      |
| Secondary Subject Heading:      | Mental health, Medical education and training, Global health, Ethics, Public health                                                                                                                                |
| Keywords:                       | MENTAL HEALTH, MEDICAL ETHICS, MEDICAL EDUCATION & TRAINING, PSYCHIATRY, PUBLIC HEALTH, QUALITATIVE RESEARCH                                                                                                       |
|                                 |                                                                                                                                                                                                                    |

SCHOLARONE™  
Manuscripts

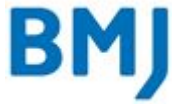

I, the Submitting Author has the right to grant and does grant on behalf of all authors of the Work (as defined in the below author licence), an exclusive licence and/or a non-exclusive licence for contributions from authors who are: i) UK Crown employees; ii) where BMJ has agreed a CC-BY licence shall apply, and/or iii) in accordance with the terms applicable for US Federal Government officers or employees acting as part of their official duties; on a worldwide, perpetual, irrevocable, royalty-free basis to BMJ Publishing Group Ltd ("BMJ") its licensees and where the relevant Journal is co-owned by BMJ to the co-owners of the Journal, to publish the Work in this journal and any other BMJ products and to exploit all rights, as set out in our [licence](#).

The Submitting Author accepts and understands that any supply made under these terms is made by BMJ to the Submitting Author unless you are acting as an employee on behalf of your employer or a postgraduate student of an affiliated institution which is paying any applicable article publishing charge ("APC") for Open Access articles. Where the Submitting Author wishes to make the Work available on an Open Access basis (and intends to pay the relevant APC), the terms of reuse of such Open Access shall be governed by a Creative Commons licence – details of these licences and which [Creative Commons](#) licence will apply to this Work are set out in our licence referred to above.

Other than as permitted in any relevant BMJ Author's Self Archiving Policies, I confirm this Work has not been accepted for publication elsewhere, is not being considered for publication elsewhere and does not duplicate material already published. I confirm all authors consent to publication of this Work and authorise the granting of this licence.

## TITLE PAGE

**Title: Improving the perception of respect for and the dignity of inpatients: A Systematic Review****Author name:**

Pablo Eduardo Pereira Dutra

**Co-authors' names:**

Laiana Azevedo Quagliato

Antonio Egidio Nardi

**Corresponding author:**

**Full name:** Pablo Eduardo Pereira Dutra

ORCID: 0000-0003-3970-5668

**Postal address:** Av. Venceslau Brás, 71, Botafogo, Rio de Janeiro, RJ, Brazil

ZIP Code: 22.290-140

**E-mail:** [pablo.medicina@ufrj.br](mailto:pablo.medicina@ufrj.br)

**Phone:** +55 21 3938-0500

**Fax:** +55 21 3938 0500

**Institution:**

Federal University of Rio de Janeiro (UFRJ)

Laboratory of Panic and Respiration (LABPR)

Institute of Psychiatry of UFRJ (IPUB/UFRJ)

**Full names, institutions, city, and country of all co-authors:**

**Full name:** Laiana Azevedo Quagliato

ORCID: 0000-0002-6928-5847

**Institution:**

Federal University of Rio de Janeiro (UFRJ)

Laboratory of Panic and Respiration (LABPR)

Institute of Psychiatry of the UFRJ (IPUB)

**City:** Rio de Janeiro

**Country:** Brazil

Full name: Antonio Egidio Nardi

ORCID: 0000-0002-2152-4669

**Institution:**

Federal University of Rio de Janeiro (UFRJ)

Laboratory of Panic and Respiration (LABPR)

Institute of Psychiatry of the UFRJ (IPUB)

**City:** Rio de Janeiro

**Country:** Brazil

**Keywords (MeSH terms):** Respect, Dignity, Patient rights, inpatients, privacy

**Word count:** 4,583

## Improving the perception of respect for and the dignity of inpatients: A Systematic Review

### ABSTRACT

**Objectives:** The aim of this systematic review is to find evidence to determine which strategies are effective for improving hospitalized patients' perception of respect and dignity.

**Methods:** A systematic review of the literature was conducted in accordance with PRISMA 2020 guidelines. The MEDLINE/PubMed, PsycINFO and Cochrane Library databases were searched on March 9, 2021. Observational studies, prospective studies, retrospective studies, controlled trials, and randomized controlled trials with interventions focused on improving respect for patients and maintaining their dignity were included. Case reports, editorials, opinion articles, studies <10 subjects, responses/replies to authors, responses/replies to editors, and review articles were excluded. The study population included inpatients at any health facility. Two evaluators assessed risk of bias according to the Cochrane Handbook of Systematic Reviews of Interventions criteria: allocation, randomization, blinding, and internal validity. The reviewers were blinded during the selection of studies as well as during the quality appraisal. Disagreements were resolved by consensus.

**Results:** 2,515 articles were retrieved from databases, and 44 articles were included in this review. We conducted a quality appraisal of the studies (27 qualitative studies, 14 cross-sectional studies, 1 cohort study, 1 quali-quantitative study and 1 convergent parallel mixed-method study).

**Discussion:** a limitation of this study is that it may not be generalizable to all cultures. Most of the included studies are of good quality according to the quality appraisal. To improve medical and hospital care in most countries, it is necessary to improve the training of doctors and other health professionals.

**Conclusion:** many strategies that could improve the perception of respect for and of the dignity of the inpatient. The lack of interventional studies in this field has led to a gap in knowledge to be filled with better designed studies and effect measurements.

**Funding:** this study has no external funding sources.

**Registration:** PROSPERO (CRD42021241805).

**Keywords:** Respect, Dignity, Patient rights, inpatients, privacy

### STRENGTHS AND LIMITATIONS OF THIS STUDY

- The review protocol was registered at PROSPERO and PRISMA guidelines were followed in this systematic review.
- A comprehensive search strategy was employed to locate studies related to the respect and dignity of inpatients, reaching many countries around the world on virtually every continent.
- The data were not homogeneous enough to perform a meta-analysis, which could enrich the results.
- One study could not be retrieved, and it might have data that could be important to the results of this study.
- Some studies presented qualitative data which were difficult to determine their validity in different cultures.

### INTRODUCTION

Dignity is a fundamental human right (1), and its maintenance is an ethical goal of care (2). The Brazilian Code of Medical Ethics (3) states that physicians must respect and act in patients' benefit. The Declaration on the Promotion of Patients' Rights in Europe (4), states that one of its objectives is "*to reaffirm fundamental human rights in health care*".

1  
2 The concept of dignity is still not clearly defined (5), and it can be affected during  
3 hospitalization (6). Hospital routines are needed to promote and protect patient health, but they  
4 can be harmful when patients experience stigma (7), violation of rights, privacy, integrity,  
5 disrespect, and breaches in confidentiality, and when facing unprepared and insecure  
6 professionals who cannot provide clear explanations about diagnostic and therapeutic  
7 procedures. All of these can lead to complaints, which can be used as a tool for improving  
8 patient care (8).

9  
10 One may think that dignity and respect violations are restricted to low-income countries or to  
11 people of low socioeconomic status, but it is a worldwide phenomenon, and it is not directly  
12 related to wealth, but to culture and professional education. Several studies suggest that  
13 patients' rights are violated daily in practically all scenarios of practice of health-related  
14 activities. However, its results are sparse and there is no systematization of what can improve  
15 patients' perception of receiving respectful and dignified care.

16  
17 Published studies, as we will see later, address specific specialties in isolation and few address  
18 this important topic comprehensively. The strategies used to improve the quality of care and  
19 the perception of respect and dignity from the patients' point of view may seem obvious, but  
20 they are not observed in practice in several countries and continents. Thus, it is necessary to  
21 review the current literature in search of strategies that can positively impact patients'  
22 perception of respect and dignity.

## 23 24 25 **OBJECTIVE**

26 The aim of this systematic review is to evaluate worldwide evidence to determine which  
27 strategies can be used to improve inpatient patients' perception of respect and dignity.

## 28 29 30 **STUDY DESIGN**

31 A systematic review with the aim of identifying, analyzing, extracting, and evaluating data  
32 from the literature related to respect for and maintenance of the dignity of hospitalized patients.  
33 It also aims to identify knowledge gaps and relate the findings to clinical practices to improve  
34 the quality of care for all hospitalized patients worldwide.

## 35 36 37 **METHODS**

38 This study was registered at PROSPERO (CRD42021241805) and conducted following  
39 PRISMA guidelines (9). Articles were identified by searching electronic records, including the  
40 MEDLINE/PubMed, PsycINFO and Cochrane Library databases. The quoted search terms  
41 used were as follows: Patient human rights violation OR Patient disrespect OR Patient violation  
42 of dignity OR Patient rights protection OR patient intimacy violation OR patient confidentiality  
43 violation OR ethical violation OR ethics violation OR hospital violation of patients' rights OR  
44 patients' perception of rights violation OR patients' perception of disrespect. There were no  
45 restrictions on year or language of publication, and no automation tool was used. The main  
46 objective was to find any interventions and multifaceted interventions aimed at improving  
47 inpatients' perception of respect and dignity and decreasing disrespect or human/inpatient  
48 rights violations, intimacy violations, confidentiality violations, autonomy violations, etc. The  
49 search included interventions conducted in hospitals, day hospitals, clinics, emergency  
50 departments, psychiatric emergencies, psychiatric hospitals, asylums, and any other places  
51 where there are inpatients. The inclusion criteria were full text, observational studies,  
52 prospective studies, retrospective studies, controlled trials, and randomized controlled trials.  
53 The exclusion criteria were case reports, editorials, opinion articles, studies <10 subjects,  
54 responses/replies to authors, and responses/replies to editors.

55 The first author (PEPD) screened the titles and abstracts of the articles and manually excluded  
56 those articles that did not fit the inclusion criteria.

57 After that, two reviewers (PEPD and LAQ) independently assessed the full texts of the  
58 remaining articles for eligibility in a standardized manner: data extraction was performed  
59  
60

1  
2 independently, and disagreements between reviewers regarding the study selection or data  
3 extraction were resolved by consensus. If a consensus was not reached, the third reviewer  
4 (AEN) was consulted.

5  
6 The following information was extracted from the full-text articles using an Excel spreadsheet:  
7 authors, place/year of publication, sample size, type of samples, study design, analysis,  
8 data/measure, strategies, interventions to achieve improvements, and limitations.

9  
10 Two reviewers assessed the risk of bias using the following criteria from the Cochrane  
11 Handbook of Systematic Reviews of Interventions version 6.2 (10). Disagreements were  
12 resolved by consulting a third reviewer. The minimum number of studies for data to be pooled  
13 was 10, including any intervention that would be effective for improving the perception of  
14 respect and dignity among inpatients.

15 A quality appraisal of the articles was performed using the CASP Qualitative Studies Checklist  
16 (11), Specialist Unit for Review Evidence (SURE) 2018 (12), CASP Cohort Study Checklist  
17 (13), and Mays & Pope Qualitative research in health care (14).  
18

### 19 ***Patient and public involvement***

20 No patient involved.  
21

### 22 ***Quality appraisal***

23 A critical appraisal of the included studies was performed, but no study was excluded based on  
24 its score, although this approach makes their analysis more robust. The instruments used for it  
25 were: CASP Qualitative Studies Checklist (11) (**Table 1**) (**See supplementary 1**); Specialist  
26 Unit for Review Evidence (SURE) - Questions to assist with the critical appraisal of cross-  
27 sectional Studies (12) (**Table 2**) (**See supplementary 2**); CASP Cohort Studies Checklist (13)  
28 (**Table 3**) (**See supplementary 3**) and the criteria put forth by Mays & Pope (2000) (14) (**Table**  
29 **4**) (**See supplementary 4**).  
30

31 They were scored as follows: 0 = not or inadequately addressed, 1 = partially addressed, and 2  
32 = fully addressed criterion. Critical appraisal scores are described below each table.  
33

34 The quality assessment of the studies and of the systematic review was performed by two  
35 reviewers independently (PEPD and LAQ), who then discussed and agreed to the final rating.  
36 No study was excluded for quality reasons, but this assessment enabled a more robust review  
37 of the studies.  
38

### 39 ***Risk of bias***

40 To minimize bias, two reviewers assessed the risk of bias using the following criteria from the  
41 Cochrane Handbook of Systematic Reviews of Interventions version 6.2 (10): methods for  
42 allocation, methods for randomization, blinding, and evaluation of internal validity. The  
43 reviewers were blinded during the selection of studies to be included and excluded as well as  
44 during the quality appraisal. Disagreements were resolved by consensus after the reviewers'  
45 judgment.  
46  
47  
48

## 49 **RESULTS**

50 Three databases were searched on March 9th, 2021: PubMed/MEDLINE, PsycINFO, and  
51 Cochrane Library. Of the 2,515 results, no article was excluded by automation tools, 3 were  
52 excluded after searching for duplicate studies using the EndNote Web tool, and 2,375 were  
53 excluded after title and abstract screening by the first reviewer (PEPD). In the second step, two  
54 reviewers (PEPD and LAQ) independently assessed the 121 articles for eligibility.  
55

56 Thirteen references were not found. The first reviewer (PEPD) contacted by e-mail and/or via  
57 ResearchGate - more than once - authors, coauthors, and journals where they were published  
58 to try to retrieve them. Up to August 5th, 2021, 9 articles were retrieved, 3 were bought online  
59 from publishers, and 1 was not retrieved and excluded. A total of 76 articles were excluded: 50  
60 did not include inpatients, 2 were not in the scope of this review, 4 were review/systematic



1  
2 review, 1 focused on health care professionals, 1 focused on the development of telehealth, 12  
3 were essay/commentary/thoughts, 2 included less than 10 patients, 1 was a study protocol, and  
4 3 were scale developments.

5  
6 Forty-four articles were included, according to PRISMA 2020 guidelines (9) (**Figure 1**): 14  
7 cross-sectional studies, 1 cohort study, 1 quali-quantitative study, 1 convergent parallel mixed-  
8 method study, and 27 qualitative studies.

9  
10 The results of articles classified as high-quality in the quality assessment receive more  
11 emphasis than those with a lower classification. They were divided according to the main  
12 themes.

### 13 14 ***Religion, emergency, psychiatric and pediatric patients***

15 Violations of patients' dignity and privacy are almost routine. The simple act of providing a  
16 patient list to third parties for religious visits without consent is considered a violation of  
17 privacy (15). Likewise, the seclusion to which psychiatric patients in agitation are subjected,  
18 often as a form of punishment, also constitutes a violation of dignity, as they are often not  
19 offered liquids and food, which makes them feel humiliated (16, 17).

20  
21 In all cases, there is a fundamental element missing, communication. In pediatrics, for example,  
22 the lack of communication between doctors and parents and patients produces anxiety and  
23 confusion (18), which could be avoided if the professional talked to families in an open and  
24 understanding way, demonstrating knowledge and security in their work. This same feeling of  
25 vulnerability and powerlessness is experienced by emergency patients, considered of low  
26 priority, as they feel insecure, exposed, and violated in their self-esteem, as they wait for  
27 professional attention for several hours in some cases (19). When the patient is of a different  
28 ethnicity from that of the doctor, this feeling of inferiority increases, as patients feel the need  
29 to be treated as equals, as people, as being important and want to have their complaints heard,  
30 receive polite, timely and with clear explanations (20).

### 31 32 33 ***Obstetric patients***

34 The feeling of invasion of privacy and lack of respect and dignity is common among obstetric  
35 patients from the first contact with obstetricians, as there is a lack of training in Respectful  
36 Maternity Care (RMC), counseling skills, in building a good physician-patient relationship  
37 (21). Professionals allege overwork, low and inadequate remuneration, lack of training,  
38 precarious and inadequate working conditions, overload due to lack of professionals (22),  
39 which can improve with investment in training, in more dignified working conditions, in  
40 improving of remuneration, in the availability of contact with other professionals for learning  
41 and consultations, as well as with a better understanding of the cultural context of the patient  
42 and the professional (23,24). Better communication between professionals and pregnant  
43 women and mothers can contribute to building a relationship of trust, promoting their  
44 engagement in breastfeeding and baby care (25).

45  
46 The female body undergoes several transformations during pregnancy, such as weight gain.  
47 Some pregnant women feel embarrassed by their doctors, due to stigma related to their weight  
48 gain, which can undermine the doctor-patient relationship (26). In Jordan, for example, women  
49 end up seeking private assistance in search of a little more respect for their privacy, since public  
50 hospitals lack sheets to cover themselves, leaving their bodies and intimacy exposed (27).

51  
52 The promotion of RMC among women and health professionals can improve the quality of  
53 care provided (28), reduce social stigma, as women with lower levels of education and lower  
54 socioeconomic status feel stigmatized and perceive that they are treated with less quality than  
55 others with better economic and social status (29). Disrespectful, unkind, rude, and negativistic  
56 behaviors only contribute to increase the level of stress and generate distrust in the parturient,  
57 who has often denied her right to a companion, feeling uninformed, abandoned, neglected, and  
58 objectified during childbirth and postpartum (30-34).

1  
2  
3 In rural Afghanistan, the training of professionals had a positive impact on the satisfaction of  
4 pregnant women in relation to health services, although there are still complaints (35), related  
5 to disrespect, low quality of services, maltreatment and disagreements between doctors and  
6 patients (36), as well as in Peru, where most research participants had already suffered at least  
7 one episode of disrespect and abuse during pregnancy and childbirth (37). The World Health  
8 Organization (WHO) recommends improvements in the quality of treatment and care for  
9 women to reduce stigma and poor care and to promote respect and dignity (38,39).

### 11 ***General hospital patients***

12 Cultural and ethnic differences between nurses and patients can contribute to negative  
13 perceptions of disrespectful and unfair treatment, particularly among ethnic minorities (40,41).  
14 Thus, it is necessary for health professionals to be attentive to recognize factors that violate or  
15 preserve dignity from the patient's point of view (42), such as interpersonal problems,  
16 professional availability and lack of empathy in communication (43), even when the patient  
17 does not actively complain, the professional must take a more proactive stance to identify and  
18 respond to the patient's needs in a timely manner, with strategies to improve patient safety,  
19 promoting their involvement in the care of their health (44,45). To this end, managers need to  
20 be sensitized to invest in professional education, to keep professionals attentive to patients'  
21 rights, reducing treatment inequities that lead patients to pilgrimage through health services in  
22 search of more dignified treatment (46,47).

25 Professional development should also promote strategies that ensure patients' privacy, not only  
26 of their personal and health information (48), since a leak can undermine the reputation of a  
27 health facility, as patients bring to the hospital expectations of receive security, respect, dignity,  
28 information, and care (49). Touching patients' personal objects or moving them can be  
29 perceived as an invasion of territory and privacy, causing discomfort (50), reinforcing the need  
30 to provide information about privacy and confidentiality before and during hospitalization (51).  
31 A Greek study showed that patients had little idea of their rights (52) and nursing has a very  
32 important role in disseminating this knowledge and ethical principles, establishing a  
33 relationship of respect for patients' rights and privacy (53-55). Intensive care unit (ICU)  
34 patients often have memories of the environment as hostile and stressful, generating negative  
35 feelings of violation of their rights to dignity and privacy, lack of empathy, not being  
36 understood, delay in getting help and be subject to full control by health professionals (56).

39 Most patients are unaware of their rights (57); a study with the distribution of information cards  
40 to patients with methicillin-resistant *S. aureus* (MRSA) infection, which should be presented  
41 to the professionals with whom they would consult, showed that these patients are subject to  
42 discrimination and lack of knowledge, which makes its use questionable (58). It is therefore  
43 imperative that healthcare professionals keep the concept of integrity in mind and that this  
44 knowledge be used to train healthcare professionals with more professionalism,  
45 communication skills, and practice-based learning (59, 60). In an increasingly digital age,  
46 resources for preserving information and privacy are essential, since patients' autonomy is  
47 closely intertwined with their dignity (61-63), which can positively impact the quality of  
48 empathic, non-possessive care, authentic and respectful, with positive results in treatment  
49 outcomes (64).

## 53 **DISCUSSION**

54 These studies reveal that there are several strategies that can improve the quality of care  
55 provided to inpatients, thus improving their perception of respect for and the maintenance of  
56 their dignity. There is a Hippocratic principle that guides the medical profession, "first, do no  
57 harm" and that must be considered in all spheres not only of the doctor-patient relationship,  
58 but of any relationship between health professionals and patients. Therefore, although we did  
59 not find studies with statistically calculated interventions and effect size measurements, the  
60 quality of the studies included in this systematic review allows us to point out some strategies

1  
2 that can help improve patients' perceptions regarding respect for and maintenance of their  
3 dignity. Patients and health professionals around the world express the same interests and  
4 desires to have the quality of care raised to the level of excellence and the rights of patients  
5 respected.  
6

7 It is necessary to keep in mind that minor violations of patients' rights happen daily, even when  
8 it is considered to have good intentions, as in the case of visits by religious to patients. Their  
9 names cannot be placed on a list without consent, as this constitutes an invasion of privacy.  
10 Likewise, when a patient needs mechanical restraint or seclusion due to aggressiveness, it is  
11 necessary to offer fluids, food, and attention, to understand why the patient acted that way, as  
12 many see this attitude as a violation of human rights or as punishment, so that the experience  
13 fulfills its therapeutic goals and does not become a source of trauma for the patient or a painful  
14 psychic experience.  
15

16 One of the keys to good relationships with patients is communication. Parents of pediatric  
17 patients, as well as patients themselves, need clear information, which gives them a sense of  
18 confidence and security. Professionals need to demonstrate skill, knowledge, and confidence  
19 during their interventions, to guarantee the best treatment for their patients and to allow patients  
20 and their parents to make the best decisions for the quality of life of their children.  
21

22 Feelings of humiliation, impotence and being "left aside" affect emergency patients, with lower  
23 risk conditions, which makes them wait for care for long periods. These patients need to receive  
24 information about their conditions and the functioning of the emergency department, they must  
25 receive information and attention from the nursing staff, as their condition can progress to more  
26 serious situations or death, if they are not checked frequently. When patients have different  
27 ethnicities than professionals, the asymmetry of the relationship seems to be exacerbated by  
28 the behavior of some professionals, leading patients to feel discriminated against, treated in a  
29 dehumanized and disrespectful way. Allowing the patient to speak, listening to the patient  
30 carefully and valuing their complaints and opinions gives them the feeling of being respected  
31 and seen as an equal person. Professionals must be aware of these subtleties of human behavior  
32 and spend more time assisting these patients in a way that makes them feel more respected and  
33 welcomed. These small actions can make a difference when a patient seeks treatment or  
34 professional help.  
35

36 The field of obstetrics is one of the fields that has more studies on the respect and dignity of  
37 patients, including the prepartum, pregnancy and postpartum periods. It is necessary for  
38 professionals in the field to be trained regarding Respectful Maternity Care (RMC). It is a  
39 woman's right to receive clear information; respectful and dignified treatment; to hug and  
40 breastfeed her child in the immediate postpartum period; to have her intimacy and privacy  
41 preserved; not being subjected to episiotomy without consent or without anesthesia; having a  
42 family member accompanying them; not being discriminated against because of their weight,  
43 ethnicity, color, race, sexuality, religion, socioeconomic status, place of residence, state or  
44 country of origin; to have a companion during childbirth, whether a family member or friend;  
45 the right not to be verbally or physically abused (not to be cursed or verbally humiliated; not  
46 to be slapped during childbirth, for example); the right not to have their bodies exposed in a  
47 hospital environment, where there is a large circulation of professionals (to be covered by a  
48 sheet); the right not to have their bodies invaded by several individuals (not being exposed to  
49 frequent vaginal examinations by various professionals, especially in teaching hospitals); the  
50 right to receive information about prenatal care, pregnancy, childbirth, postpartum,  
51 breastfeeding, contraception, vaccination and infectious-contagious diseases that can affect the  
52 mother and baby; the right to have quality and humanized care in any device in the care  
53 network, whether public or private; the right to receive analgesia or anesthesia; and the right to  
54 have less prolonged care, whether public or private.  
55

56 Obstetric violence is present in several fields of action, among the various health professionals  
57 who work in this area, from harshly speaking to or yelling at, to physically or sexually  
58 assaulting a woman. Considering the most diverse studies on the subject, this practice is  
59  
60

widespread in several countries around the world, from the U.S. to Asian countries, and there needs to be a large investment in education and training of health professionals so that women of childbearing age can be assisted with dignity and respect.

Professionals should be aware of the cultural subtleties of the patients they serve, as many behaviors may seem inappropriate in multicultural contexts, as the patient's education, culture, socioeconomic level, and religion produce different perceptions about the professionals' conduct. This can lead to negative perceptions and complaints, for example regarding discrimination and quality of care.

A conciliatory and more proactive attitude towards avoiding conflicts can improve patients' perception of the professional and the health facility during the hospitalization period. The investment in training and education of health professionals is the best solution to improve the quality of care, bringing patients to a more active position in their treatment, promoting information and autonomy, aiding in a timely manner, respecting rights, maintaining vigilance in cases of disrespect and violations of dignity, encouraging the acceptance of differences, reducing all types of prejudice and stigma, and allowing professionals and patients to act together.

Small attitudes of health professionals can turn into big problems: touching personal belongings without authorization, moving objects, exposing the patient, and making inappropriate comments, even though it may seem like just an innocent joke. One of the solutions may be to ask patients and family members to carry out assessments about the service, analyze complaints in the ombudsman's office, and use these data as important tools to improve the quality of the service provided. Patient concern regarding the confidentiality of their medical information is another point that deserves attention. The right to privacy and confidentiality is directly related to the respect and dignity of patients. Violations of confidentiality, in addition to being unethical, can cause moral and financial damage to patients and their families, leading to legal actions against professionals and hospitals. Another way to give patients more freedom and autonomy is to guarantee them access to their medical information, either through direct access to the system or through applications. Thus, managers and government officials must invest in information security systems, since the world is increasingly digital and the trend is to reduce the use of printed documents, ensuring the protection of data for patients and professionals. Patients must receive information about current legislation in terms of information security, their rights to privacy and confidentiality, and nursing has a fundamental role in the dissemination of ethical principles in the work environment.

The results found in the articles included in this systematic review show that there is still a long way to go in promoting more dignified and respectful care for patients admitted to health care units around the world. The innovation is in the synthesis and enumeration of these practices, which can bring a new way of dealing with information and profoundly change the way we serve and think about the care provided to hospitalized patients. Regardless of culture and nationality, studies show that there is a need to improve the quality of care, whether through improvements in education during graduation, in student training, in the use of reality data to refine professional practice, or through training of professionals when entering the labor market, offering refresher courses, recycling professionals and promoting the availability of safe means by which professionals can discuss cases and share knowledge without breaching professional secrecy.

### **STRENGTHS OF THIS STUDY**

Our study covers a wide range of topics related to the respect and dignity of inpatients, reaching many countries around the world on virtually every continent. In addition, this systematic review fills a knowledge gap in an area that has not yet been studied, which, although gaining prominence in recent years, lacks more research and development. The fact that there is no

1  
2 limitation on the time researched and, on the language, allowed us to reach from the most recent  
3 to the oldest studies on this topic.  
4

## 5 6 **LIMITATIONS**

7 Although we have tried to reach as many studies as possible, its results cannot be generalized  
8 to all cultures and countries of the world, and it does not include all specialties and their  
9 peculiarities. One study could not be retrieved, and it might have data that could be important  
10 to the results of this study. The data were not homogeneous enough to perform a meta-analysis,  
11 which would enrich the results. More studies with controlled interventions and outcomes  
12 should be carried out to measure the effect on the perception of respect for and maintenance of  
13 the dignity of hospitalized patients.  
14

## 15 16 **STATEMENT OF FINDINGS**

17 Regarding clinical practice, our study brings several collaborations based on the findings of the  
18 reviewed articles. Actions to promote dignity include: providing information correctly and  
19 clearly about procedures and treatments, serving with politeness and kindness, avoiding  
20 gestures and comments that might be perceived as disrespectful, putting aside prejudices (you  
21 are not there to judge but to serve to the best of your ability and professional ethics), taking as  
22 much time to serve as necessary, adhering to confidentiality when sharing information with  
23 team members, listening to complaints and trying to resolve them, responding to timely calls,  
24 using patient complaints made as a way to improve the hospital routine, promoting  
25 improvements in the quality of the environment (including cleaning, lighting and noise  
26 control), allowing pregnant women to have companions, avoiding yelling at patients or using  
27 physical touch as a form of reprimand (which can be understood as physical aggression),  
28 avoiding unnecessary exposure of the patient's body, avoiding intimate examination by various  
29 professionals (especially in teaching hospitals), obtaining consent for diagnostic and  
30 therapeutic procedures, informing patients about the drugs that will be applied (name and what  
31 they are used for), introducing oneself to the patient, asking if the patient wants to receive visits  
32 and from whom, asking who the patient would like to share information with, calling the patient  
33 by his or her name (avoiding colloquial or derogatory language), demonstrating knowledge,  
34 showing security and professional skills, and using setbacks as opportunities for your own and  
35 for your team's collective learning.  
36  
37  
38  
39

## 40 41 **IMPLICATIONS FOR PRACTICE**

42 Our findings provide perspectives that could and should be used to improve patient care and  
43 education in different areas of health around the world.  
44

## 45 46 **IMPLICATIONS FOR RESEARCH**

47 Virtually all studies related to the quality of care, respect, dignity, confidentiality, and privacy  
48 of hospitalized patients, have a qualitative or cross-sectional design. It is necessary that future  
49 research be designed with controlled interventions and effect size measurement to bring more  
50 robustness to the findings, since this subject is gaining prominence in daily practice.  
51 Furthermore, regardless of the country, respect and dignity are universal and fundamental  
52 rights of every human being and must, therefore, be put into practice wherever patients are.  
53

## 54 55 **CONCLUSION**

56 Our systematic review touches on important points of care during professional practice, with  
57 the aim of delivering truly patient-centered care to patients.

58 Professional practice is regulated by legal means and by professional education, but it is  
59 observed that there is a lack of training so that various everyday conflicts can be mitigated and  
60 resolved locally without harming the patient. It is inconceivable that patients need to look for  
another health facility because they feel mistreated at a place that should provide care.

Likewise, it is unacceptable for a health professional not to be able to handle situations in their professional routine without resorting to violence or verbal aggression. When a patient goes to a health unit, he or she seeks care; therefore, we have the obligation to provide care, without prejudice, without discrimination and to the best of our technical capacity, with respect and dignity. This is the wish of all patients around the world.

### **REGISTRATION AND PROTOCOL**

This study protocol was registered at PROSPERO (CRD42021241805 - Improving the perception of respect for and the dignity of the inpatient: A Review), and it was conducted in accordance with PRISMA 2020 guidelines (9).

### **FUNDING**

This study has no external funding source.

### **CONFLICTS OF INTEREST**

The authors declare that they have no competing interests.

### **CONTRIBUTORSHIP STATEMENT**

The study concept was developed by PEPD. The manuscript of the protocol was drafted by PEPD and critically revised by LAQ and AEN. PEPD developed and provided feedback for all sections of the review protocol and approved the final manuscript. The search strategy was developed by PEPD and LAQ. Study selection was performed by PEPD and LAQ. Data extraction and quality assessment was performed by PEPD and LAQ, with AEN as a third party in case of disagreements. All authors have approved the final version of the manuscript.

### **DATA AVAILABILITY STATEMENT**

No additional data available.

### **REFERENCES**

- 1) United Nations. Universal Declaration of Human Rights | united nations. [cited 2021 June 8]; Available from: <https://www.un.org/en/about-us/universal-declaration-of-human-rights>
- 2) Ferri P, Muzzalupo J, Di Lorenzo R. Patients' perception of dignity in an Italian general hospital: a cross-sectional analysis. *BMC Health Serv Res.* 2015;15(1):41-48.
- 3) Conselho Federal de Medicina. Código de Ética Médica [Internet]. Conselho Federal de Medicina. 2019 [cited 2021 June 8]. Available from: <https://portal.cfm.org.br/images/PDF/cem2019.pdf>
- 4) World Health Organization (WHO). A Declaration on the Promotion of Patients Rights in Europe. [Internet] 1994. [cited 2021 June 08]. Available from: [https://www.who.int/genomics/public/eu\\_declaration1994.pdf](https://www.who.int/genomics/public/eu_declaration1994.pdf)
- 5) Bagheri A. Elements of human dignity in healthcare settings: the importance of the patient's perspective. *J Med Ethics.* 2012;38(12):729–30.

- 1  
2  
3 6) Campillo B, Corbella J, Gelpi M, Martinez E, Viciano MA, Alonso M. Development  
4 and validation of the scale of perception of respect for and maintenance of the dignity of the  
5 inpatient [CuPDPH]. *Ethics Med Public Health*. 2020;15(100553):100553.
- 6  
7 7) Phelan SM, Burgess DJ, Yeazel MW, Hellerstedt WL, Griffin JM, van Ryn M. Impact  
8 of weight bias and stigma on quality of care and outcomes for patients with obesity: Obesity  
9 stigma and patient care. *Obes Rev*. 2015;16(4):319–26.
- 10  
11 8) Mirzoev T, Kane S. Key strategies to improve systems for managing patient complaints  
12 within health facilities - what can we learn from the existing literature? *Glob Health Action*.  
13 2018;11(1):1458938.
- 14  
15 9) Page MJ, McKenzie JE, Bossuyt PM, Boutron I, Hoffmann TC, Mulrow CD, et al. The  
16 PRISMA 2020 statement: an updated guideline for reporting systematic reviews. *Syst Rev*.  
17 2021;10(1):89.
- 18  
19 10) Chapter 7: Considering bias and conflicts of interest among the included studies  
20 [Internet]. *Cochrane.org*. [cited 2021 June 8]. Available from:  
21 <https://training.cochrane.org/handbook/current/chapter-07>
- 22  
23 11) Critical Appraisal Skills Programme. CASP Qualitative Studies Checklist [Internet]. B-  
24 cdn.net. [cited 2021 Jul 6]. Available from: [https://casp-uk.b-cdn.net/wp-](https://casp-uk.b-cdn.net/wp-content/uploads/2018/03/CASP-Qualitative-Checklist-2018_fillable_form.pdf)  
25 [content/uploads/2018/03/CASP-Qualitative-Checklist-2018\\_fillable\\_form.pdf](https://casp-uk.b-cdn.net/wp-content/uploads/2018/03/CASP-Qualitative-Checklist-2018_fillable_form.pdf)
- 26  
27 12) Specialist Unit for Review Evidence (SURE). Questions to assist with the critical  
28 appraisal of cross-sectional studies [Internet]. *Cardiff.ac.uk*. 2015 [cited 2021 Jul 9]. Available  
29 from:  
30 [https://www.cardiff.ac.uk/\\_\\_data/assets/pdf\\_file/0006/212775/SURE\\_Qualitative\\_checklist\\_](https://www.cardiff.ac.uk/__data/assets/pdf_file/0006/212775/SURE_Qualitative_checklist_2015.pdf)  
31 [2015.pdf](https://www.cardiff.ac.uk/__data/assets/pdf_file/0006/212775/SURE_Qualitative_checklist_2015.pdf)
- 32  
33 13) Critical Appraisal Skills Programme. CASP Cohort Study Checklist [Internet]. B-  
34 cdn.net. [cited 2021 Jul 26]. Available from: [https://casp-uk.b-cdn.net/wp-](https://casp-uk.b-cdn.net/wp-content/uploads/2018/03/CASP-Cohort-Study-Checklist-2018_fillable_form.pdf)  
35 [content/uploads/2018/03/CASP-Cohort-Study-Checklist-2018\\_fillable\\_form.pdf](https://casp-uk.b-cdn.net/wp-content/uploads/2018/03/CASP-Cohort-Study-Checklist-2018_fillable_form.pdf)
- 36  
37 14) Mays N, Pope C. Qualitative research in health care. Assessing quality in qualitative  
38 research. *BMJ*. 2000;320(7226):50–2.
- 39  
40 15) Erde E, Pomerantz SC, Saccocci M, Kramer-Feeley V, Cavalieri TA. Privacy and  
41 patient-clergy access: perspectives of patients admitted to hospital. *J Med Ethics*.  
42 2006;32(7):398–402.
- 43  
44 16) Faschingbauer KM, Peden-McAlpine C, Tempel W. Use of seclusion: finding the voice  
45 of the patient to influence practice. *J Psychosoc Nurs Ment Health Serv*. 2013;51(7):32–8.
- 46  
47  
48  
49  
50  
51  
52  
53  
54  
55  
56  
57  
58  
59  
60

- 17) Robins CS, Sauvageot JA, Cusack KJ, Suffoletta-Maierle S, Frueh BC. Consumers' perceptions of negative experiences and "sanctuary harm" in psychiatric settings. *Psychiatr Serv*. 2005;56(9):1134–8.
- 18) Hsiao JL, Evan EE, Zeltzer LK. Parent and child perspectives on physician communication in pediatric palliative care. *Palliat Support Care*. 2007;5(4):355–65.
- 19) Adolfsson A, Dahlén, Westin. Experience of being a low priority patient during waiting time at an emergency department. *Psychol Res Behav Manag*. 2012;5:1-9.
- 20) Beach MC, Branyon E, Saha S. Diverse patient perspectives on respect in healthcare: A qualitative study. *Patient Educ Couns*. 2017;100(11):2076–80.
- 21) Burrowes S, Holcombe SJ, Jara D, Carter D, Smith K. Midwives' and patients' perspectives on disrespect and abuse during labor and delivery care in Ethiopia: a qualitative study. *BMC Pregnancy Childbirth*. 2017;17(1):263-74.
- 22) Dynes MM, Twentyman E, Kelly L, Maro G, Msuya AA, Dominico S, et al. Patient and provider determinants for receipt of three dimensions of respectful maternity care in Kigoma Region, Tanzania-April-July, 2016. *Reprod Health [Internet]*. 2018;15(1):41-64.
- 23) Gebremichael MW, Worku A, Medhanyie AA, Berhane Y. Mothers' experience of disrespect and abuse during maternity care in northern Ethiopia. *Glob Health Action*. 2018;11(sup3):1465215.
- 24) Gebremichael MW, Worku A, Medhanyie AA, Edin K, Berhane Y. Women suffer more from disrespectful and abusive care than from the labour pain itself: a qualitative study from Women's perspective. *BMC Pregnancy Childbirth*. 2018;18(1):392-97.
- 25) Horwood C, Haskins L, Luthuli S, McKerrow N. Communication between mothers and health workers is important for quality of newborn care: a qualitative study in neonatal units in district hospitals in South Africa. *BMC Pediatr*. 2019;19(1):496-508.
- 26) Incollingo Rodriguez AC, Smieszek SM, Nippert KE, Tomiyama AJ. Pregnant and postpartum women's experiences of weight stigma in healthcare. *BMC Pregnancy Childbirth*. 2020;20(1):499-508.
- 27) Hussein SAAA, Dahlen HG, Ogunsiji O, Schmied V. Uncovered and disrespected. A qualitative study of Jordanian women's experience of privacy in birth. *Women Birth*. 2020;33(5):496–504.
- 28) Jolly Y, Aminu M, Mgawadere F, van den Broek N. "We are the ones who should make the decision" - knowledge and understanding of the rights-based approach to maternity care among women and healthcare providers. *BMC Pregnancy Childbirth*. 2019;19(1):42-9.



- 1  
2  
3 29) Kanengoni B, Andajani-Sutjahjo S, Holroyd E. Women's experiences of disrespectful  
4 and abusive maternal health care in a low resource rural setting in eastern Zimbabwe.  
5 *Midwifery*. 2019;76:125–31.  
6  
7 30) Khresheh R, Barclay L, Shoqirat N. Caring behaviours by midwives: Jordanian  
8 women's perceptions during childbirth. *Midwifery*. 2019;74:1–5.  
9  
10 31) Kujawski S, Mbaruku G, Freedman LP, Ramsey K, Moyo W, Kruk ME. Association  
11 between disrespect and abuse during childbirth and women's confidence in health facilities in  
12 Tanzania. *Matern Child Health J*. 2015;19(10):2243–50.  
13  
14 32) McMahan SA, George AS, Chebet JJ, Moshia IH, Mpembeni RNM, Winch PJ.  
15 Experiences of and responses to disrespectful maternity care and abuse during childbirth; a  
16 qualitative study with women and men in Morogoro Region, Tanzania. *BMC Pregnancy*  
17 *Childbirth*. 2014;14:268-80.  
18  
19 33) Millicent Dzomeku V, van Wyk B, Lori JR. Experiences of women receiving childbirth  
20 care from public health facilities in Kumasi, Ghana. *Midwifery*. 2017;55:90–5.  
21  
22 34) Rodríguez-Almagro J, Hernández-Martínez A, Rodríguez-Almagro D, Quirós-García  
23 JM, Martínez-Galiano JM, Gómez-Salgado J. Women's perceptions of living a traumatic  
24 childbirth experience and factors related to a birth experience. *Int J Environ Res Public Health*.  
25 2019;16(9):1654-66.  
26  
27 35) Thommesen T, Kismul H, Kaplan I, Safi K, Van den Bergh G. “The midwife helped  
28 me ... otherwise I could have died”: women's experience of professional midwifery services in  
29 rural Afghanistan - a qualitative study in the provinces Kunar and Laghman. *BMC Pregnancy*  
30 *Childbirth*. 2020;20(1):140-56.  
31  
32 36) Vedam S, Stoll K, Taiwo TK, Rubashkin N, Cheyney M, Strauss N, et al. The Giving  
33 Voice to Mothers study: inequity and mistreatment during pregnancy and childbirth in the  
34 United States. *Reprod Health*. 2019;16(1):77-94.  
35  
36 37) Montesinos-Segura R, Urrunaga-Pastor D, Mendoza-Chuctaya G, Taype-Rondan A,  
37 Helguero-Santin LM, Martinez-Ninanqui FW, et al. Disrespect and abuse during childbirth in  
38 fourteen hospitals in nine cities of Peru. *Int J Gynaecol Obstet*. 2018;140(2):184–90.  
39  
40 38) The White Ribbon Alliance. Respectful Maternity Care: The Universal Rights of  
41 Childbearing Women [Internet]. *Healthpolicyproject.com*. [cited 2021 Aug 22]. Available  
42 from: [http://www.healthpolicyproject.com/pubs/46\\_FinalRespectfulCareCharter.pdf](http://www.healthpolicyproject.com/pubs/46_FinalRespectfulCareCharter.pdf)  
43  
44 39) WHO Statement. The prevention and elimination of disrespect and abuse during  
45 facility-based childbirth [Internet]. *Who.int*. [cited 2021 Aug 22]. Available from:  
46 [https://apps.who.int/iris/bitstream/handle/10665/134588/WHO\\_RHR\\_14.23\\_eng.pdf](https://apps.who.int/iris/bitstream/handle/10665/134588/WHO_RHR_14.23_eng.pdf)  
47  
48  
49  
50  
51  
52  
53  
54  
55  
56  
57  
58  
59  
60

- 1  
2  
3 40) Asmaningrum N, Kurniawati D, Tsai Y-F. Threats to patient dignity in clinical care  
4 settings: A qualitative comparison of Indonesian nurses and patients. *J Clin Nurs*. 2020;29(5–  
5 6):899–908.
- 7 41) Blanchard J, Lurie N. R-E-S-P-E-C-T: patient reports of disrespect in the health care  
8 setting and its impact on care. *J Fam Pract*. 2004;53(9):721–30.
- 9  
10 42) Ebrahimi H, Torabizadeh C, Mohammadi E, Valizadeh S. Patients' perception of  
11 dignity in Iranian healthcare settings: a qualitative content analysis. *J Med Ethics*.  
12 2012;38(12):723–8.
- 13  
14 43) King JD, van Dijk PAD, Overbeek CL, Hageman MGJS, Ring D. Patient complaints  
15 emphasize non-technical aspects of care at a tertiary referral hospital. *Arch Bone Jt Surg*.  
16 2017;5(2):74–81.
- 17  
18 44) Howard M, Fleming ML, Parker E. Patients do not always complain when they are  
19 dissatisfied: implications for service quality and patient safety. *J Patient Saf*. 2013;9(4):224–  
20 21 22 23 24 25 26 27 28 29 30 31 32 33 34 35 36 37 38 39 40 41 42 43 44 45 46 47 48 49 50 51 52 53 54 55 56 57 58 59 60
- 31 45) Hrisos S, Thomson R. Seeing it from both sides: do approaches to involving patients in  
improving their safety risk damaging the trust between patients and healthcare professionals?  
An interview study. *PLoS One*. 2013;8(11):e80759.
- 32 46) Khademi M, Mohammadi E, Vanaki Z. On the violation of hospitalized patients' rights:  
A qualitative study. *Nurs Ethics*. 2019;26(2):576–86.
- 33 47) Fleury S, Bicudo V, Rangel G. Reacciones a la violencia institucional: estrategias de  
los pacientes frente al contraderecho a la salud en Brasil. *Salud Colect*. 2013;9(1):11–25.
- 34 48) Kuo K-M, Ma C-C, Alexander JW. How do patients respond to violation of their  
information privacy? *Health Inf Manag*. 2014;43(2):23–33.
- 35 49) Lee AV, Moriarty JP, Borgstrom C, Horwitz LI. What can we learn from patient  
dissatisfaction? An analysis of dissatisfying events at an academic medical center. *J Hosp Med*.  
2010;5(9):514–20.
- 36 50) Marin CR, Gasparino RC, Puggina AC. The perception of territory and personal space  
invasion among hospitalized patients. *PLoS One*. 2018;13(6):e0198989.
- 37 51) Mohammadi M, Larijani B, Emami Razavi SH, Fotouhi A, Ghaderi A, Madani SJ, et  
al. Do patients know that physicians should be confidential? study on patients' awareness of  
privacy and confidentiality. *J Med Ethics Hist Med*. 2018;11:1-7.
- 38 52) Merakou K, Dalla-Vorgia P, Garanis-Papadatos T, Kourea-Kremastinou J. Satisfying  
Patients' Rights: a hospital patient survey. *Nurs Ethics*. 2001;8(6):499–509.

- 1  
2  
3 53) Ming Y, Wei H, Cheng H, Ming J, Beck M. Analyzing patients' complaints:  
4 Awakening of the ethic of belonging: Awakening of the ethic of belonging. *ANS Adv Nurs*  
5 *Sci.* 2019;42(4):278–88.  
6  
7 54) Öztürk H, Torun Kılıç Ç, Kahrıman İ, Meral B, Çolak B. Assessment of nurses' respect  
8 for patient privacy by patients and nurses: A comparative study. *J Clin Nurs.* 2021;30(7–  
9 8):1079–90.  
10  
11 55) Pupulim JSL, Sawada NO. Percepção de pacientes sobre a privacidade no hospital. *Rev*  
12 *Bras Enferm.* 2012;65(4):621–9.  
13  
14 56) Sanson G, Lobefalo A, Fasci A. “Love can't be taken to the hospital. If it were possible,  
15 it would be better”: Patients' experiences of being cared for in an intensive care unit. *Qual*  
16 *Health Res.* 2021;31(4):736–53.  
17  
18 57) Santos LR, Beneri RL, Lunardi VL. Ethical questions in the work of the health team:  
19 the (dis)respect to client's rights. *Rev Gaucha Enferm.* 2005;26(3):403–13.  
20  
21 58) Skyman E, Bergbom I, Lindahl B, Larsson L, Lindqvist A, Thunberg Sjöström H, et al.  
22 Notification card to alert for methicillin-resistant *Staphylococcus aureus* is stigmatizing from  
23 the patient's point of view. *Scand J Infect Dis.* 2014;46(6):440–6.  
24  
25 59) Widäng I, Fridlund B. Self-respect, dignity and confidence: conceptions of integrity  
26 among male patients: Conceptions of integrity among male patients. *J Adv Nurs.*  
27 2003;42(1):47–56.  
28  
29 60) Wofford MM, Wofford JL, Bothra J, Kendrick SB, Smith A, Lichstein PR. Patient  
30 complaints about physician behaviors: a qualitative study. *Acad Med.* 2004;79(2):134–8.  
31  
32 61) Kayaalp M. Patient privacy in the era of big data. *Balkan Med J.* 2018;35(1):8–17.  
33  
34 62) Rodríguez-Prat A, Monforte-Royo C, Porta-Sales J, Escribano X, Balaguer A. Patient  
35 perspectives of dignity, autonomy and control at the end of life: Systematic review and meta-  
36 ethnography. *PLoS One.* 2016;11(3):e0151435.  
37  
38 63) Kisvetrová H, Tomanová J, Hanáčková R, Greaves PJ, Steven A. Dignity and predictors  
39 of its change among inpatients in long-term care. *Clin Nurs Res.* 2021;10547738211036968.  
40  
41 64) Kallergis G. The contribution of the relationship between therapist-patient and the  
42 context of the professional relationship. *Psychiatrike.* 2019;30(2):165–74.  
43  
44  
45  
46  
47  
48  
49  
50  
51  
52  
53  
54  
55

## 56 COPYRIGHT/LICENSE FOR PUBLICATION

57  
58 “The Corresponding Author has the right to grant on behalf of all authors and does grant on  
59 behalf of all authors, a worldwide licence to the Publishers and its licensees in perpetuity, in  
60 all forms, formats and media (whether known now or created in the future), to i) publish,  
reproduce, distribute, display and store the Contribution, ii) translate the Contribution into

1  
2 other languages, create adaptations, reprints, include within collections and create summaries,  
3 extracts and/or, abstracts of the Contribution, iii) create any other derivative work(s) based on  
4 the Contribution, iv) to exploit all subsidiary rights in the Contribution, v) the inclusion of  
5 electronic links from the Contribution to third party material where-ever it may be located;  
6 and, vi) licence any third party to do any or all of the above."  
7  
8  
9  
10  
11  
12

13 **Figure 1:** PRISMA flow diagram  
14  
15  
16  
17  
18  
19  
20  
21  
22  
23  
24  
25  
26  
27  
28  
29  
30  
31  
32  
33  
34  
35  
36  
37  
38  
39  
40  
41  
42  
43  
44  
45  
46  
47  
48  
49  
50  
51  
52  
53  
54  
55  
56  
57  
58  
59  
60

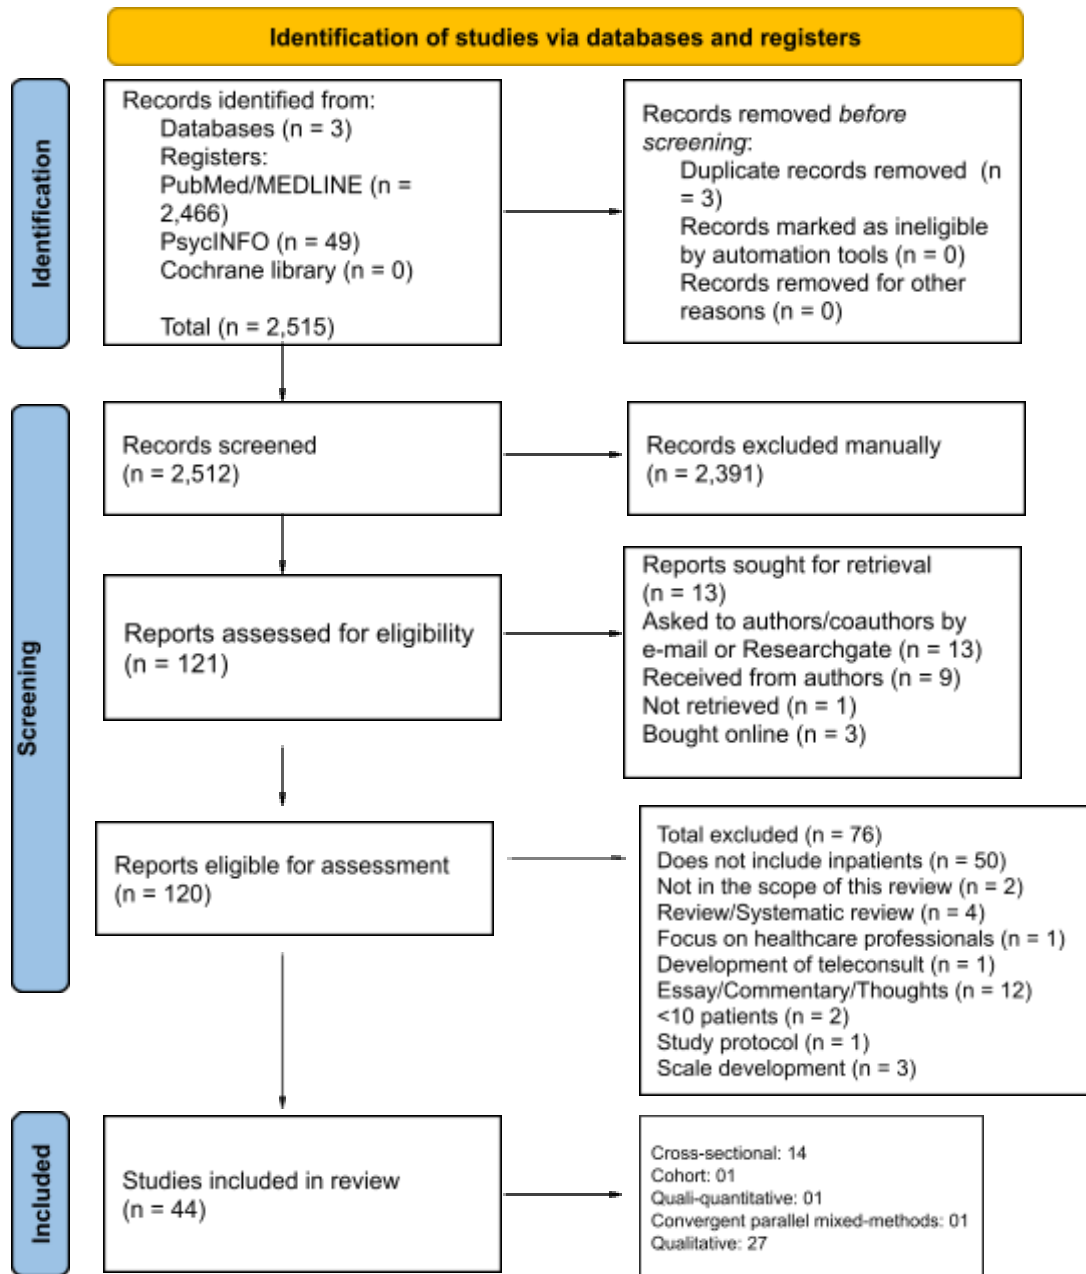

Figure 1: PRISMA flow diagram

| Author (year of publication)                   | Torabizadeh C. et al (2012)                  | Aminu M. et al (2019)                                                                                                                                                       | Horwitz L. I. et al (2010)                                                                                              |
|------------------------------------------------|----------------------------------------------|-----------------------------------------------------------------------------------------------------------------------------------------------------------------------------|-------------------------------------------------------------------------------------------------------------------------|
| Aims                                           | 2                                            | 2                                                                                                                                                                           | 2                                                                                                                       |
| Methods                                        | 2                                            | 2                                                                                                                                                                           | 2                                                                                                                       |
| Design and Methods                             | 2                                            | 2                                                                                                                                                                           | 2                                                                                                                       |
| Recruitment strategy                           | 2                                            | 2                                                                                                                                                                           | 2                                                                                                                       |
| Data collection                                | 2                                            | 2                                                                                                                                                                           | 2                                                                                                                       |
| Bias and Reflexivity                           | 1                                            | 1                                                                                                                                                                           | 1                                                                                                                       |
| Ethical issues                                 | 2                                            | 2                                                                                                                                                                           | 2                                                                                                                       |
| Data analysis                                  | 2                                            | 2                                                                                                                                                                           | 2                                                                                                                       |
| Statement of findings                          | 2                                            | 2                                                                                                                                                                           | 2                                                                                                                       |
| Value and applicability                        | 2                                            | 2                                                                                                                                                                           | 2                                                                                                                       |
| <b>Total</b>                                   | <b>19</b>                                    | <b>19</b>                                                                                                                                                                   | <b>19</b>                                                                                                               |
| Country (year of research and data collection) | Iran (2010/2011)                             | Malawi (2016)                                                                                                                                                               | USA (2007/2008)                                                                                                         |
| Sample size                                    | 20                                           | 73                                                                                                                                                                          | 976                                                                                                                     |
| Type of samples                                | 20 patients (12 women, 08 men; aged 21-78yr) | 64 women (33 in antenatal care; 09 in intrapartum care; 22 in postnatal care); 09 healthcare providers (01 in antenatal care; 02 in intrapartum care; 06 in postnatal care) | 976 postdischarge patients from medical, surgical, gynecology-oncology, neurology, neurosurgery, or Intensive care unit |

1  
2  
3  
4  
5  
6  
7  
8  
9  
10  
11  
12  
13  
14  
15  
16  
17  
18  
19  
20  
21  
22  
23  
24  
25  
26  
27  
28  
29  
30  
31  
32  
33  
34  
35  
36  
37  
38  
39  
40  
41  
42  
43  
44  
45  
46  
47  
48  
49  
50  
51  
52  
53  
54  
55  
56  
57  
58  
59  
60

|                                                                                 |                                                         |                                                                                                                                                                                                                                                                                                                                                                                                                                                                                                                                                                                                                                                           |                                                                                                                                                                                                                                                                                                    |                                                                                                                                                                                                                                                                                                                                                                                                                                                                                                                                                                                          |
|---------------------------------------------------------------------------------|---------------------------------------------------------|-----------------------------------------------------------------------------------------------------------------------------------------------------------------------------------------------------------------------------------------------------------------------------------------------------------------------------------------------------------------------------------------------------------------------------------------------------------------------------------------------------------------------------------------------------------------------------------------------------------------------------------------------------------|----------------------------------------------------------------------------------------------------------------------------------------------------------------------------------------------------------------------------------------------------------------------------------------------------|------------------------------------------------------------------------------------------------------------------------------------------------------------------------------------------------------------------------------------------------------------------------------------------------------------------------------------------------------------------------------------------------------------------------------------------------------------------------------------------------------------------------------------------------------------------------------------------|
| <p>CASP Qualitative Studies Checklist (Critical Appraisal Skills Programme)</p> | <p><b>STRATEGIES/BEHAVIORS/OUTCOMES OF INTEREST</b></p> | <p>To improve ways to reduce devaluation and to promote patients' dignity; to create organizations to promote and to protect patient dignity</p>                                                                                                                                                                                                                                                                                                                                                                                                                                                                                                          | <p>Staff behaviour; Good communication; Consent and decision-making; Privacy and confidentiality</p>                                                                                                                                                                                               | <p>Safety, treatment with respect and dignity, prompt and efficient care, successful exchange of information, environmental control and autonomy, high-quality amenities</p>                                                                                                                                                                                                                                                                                                                                                                                                             |
|                                                                                 | <p><b>INTERVENTIONS TO ACHIEVE IMPROVEMENTS</b></p>     | <p>Provide adequate supplies and necessary facilities; environmental sanitation and cleanliness; loudness at night; avoid unpleasant tasks to be done by companions, not allowing companions to get involved in private issues; provide comfort to companions; avoid unnecessary undressing or body exposure, medical or nurse rounds while changing or using bed pans, avoid presence of members of opposite sex, try to provide care by same sex staff, male and female staff should be available on shifts; provide clear, effective and friendly verbal and gestural communication; try to minimize the cultural clash between patients and staff</p> | <p>Staff behaviour that showed commitment and empathy and was non-judgmental; to allow women to express concerns and ask questions, give information, educational talks, counselling sessions; involve women and family in decisions; avoid breach in confidentiality, respect women's privacy</p> | <p>Improve safety (diet, medication administration, patient identification, and equipment); improve staff knowledge and skills; improve cleanliness and environmental control; ethical, respectful, warmth, attentive to privacy and confidentiality, and dignifying staff attitudes; reduce waiting times for admission, transport, discharge, and staff responses to patients' needs; improve provider-patient and provider-provider communication; improve environmental control (noise, cleanliness, smells, pain, interruption, food, smoking, lighting, temperature, humidity)</p> |

|  |                |                                                                                                                                                                                                                                                                                                                                                                                                                                                                                                                                                                                                                                                                                                                                                                                                                                                                                                                                                                                                                                                                                                                                                                                                   |                                                                                                                                                                                                                                                                                                                                                                                                                                                                                                                                                                                                                                                                                                      |                                                                                                                                                                                                                                                                                                                                                                                                                                |
|--|----------------|---------------------------------------------------------------------------------------------------------------------------------------------------------------------------------------------------------------------------------------------------------------------------------------------------------------------------------------------------------------------------------------------------------------------------------------------------------------------------------------------------------------------------------------------------------------------------------------------------------------------------------------------------------------------------------------------------------------------------------------------------------------------------------------------------------------------------------------------------------------------------------------------------------------------------------------------------------------------------------------------------------------------------------------------------------------------------------------------------------------------------------------------------------------------------------------------------|------------------------------------------------------------------------------------------------------------------------------------------------------------------------------------------------------------------------------------------------------------------------------------------------------------------------------------------------------------------------------------------------------------------------------------------------------------------------------------------------------------------------------------------------------------------------------------------------------------------------------------------------------------------------------------------------------|--------------------------------------------------------------------------------------------------------------------------------------------------------------------------------------------------------------------------------------------------------------------------------------------------------------------------------------------------------------------------------------------------------------------------------|
|  | <b>RESULTS</b> | <p><b>Lack of facilities and equipment:</b> Shortage of facilities and equipment is an obstacle to dignity. <b>Unhygienic conditions:</b> cleaning of their environment was necessary for them to feel dignity. <b>Annoying noise:</b> Crowded wards annoyed the majority of patients preventing peace and tranquillity.</p> <p><b>Compulsory companionship:</b> not only does the patient want to have a companion, the staff expects them to have one. <b>Lack of companion's comfort:</b> They believe that their dignity is not maintained if their companions are not appreciated by the healthcare system. <b>Indecent body exposure:</b> being exposed to others shows disregard for their dignity. <b>Mixed-gender situations:</b> Patients felt uncomfortable when they were left with patients of the opposite sex in rooms or wards. <b>Inadequate verbal and gestural communication:</b> patients were dissatisfied with ineffective communication from healthcare providers. <b>Cultural and social gap:</b> as patients normally have no choice about roommates, some consider that they are not given as much respect as they should be in accordance with their social class.</p> | <p>Important themes that emerged included: the importance of a valued patient-provider relationship as determined by a good attitude and method of communication, the need for more education of women regarding the stages of pregnancy and labour, what happens at each stage and which complications could occur, the importance of a woman's involvement in decision-making, the need to maintain confidentiality when required and the problem of insufficient human resources. Prompt and timely service was considered a priority. Neither women accessing maternity care nor trained healthcare providers providing this care were aware of the respectful maternity care (RMC) Charter.</p> | <p>Six major domains of dissatisfaction were identified: ineptitude, disrespect, waits, ineffective communication, lack of environmental control, and substandard amenities. These domains corresponded to six implicit expectations for quality hospital care: safety, treatment with respect and dignity, minimized wait times, effective communication, control over physical surroundings, and high-quality amenities.</p> |
|--|----------------|---------------------------------------------------------------------------------------------------------------------------------------------------------------------------------------------------------------------------------------------------------------------------------------------------------------------------------------------------------------------------------------------------------------------------------------------------------------------------------------------------------------------------------------------------------------------------------------------------------------------------------------------------------------------------------------------------------------------------------------------------------------------------------------------------------------------------------------------------------------------------------------------------------------------------------------------------------------------------------------------------------------------------------------------------------------------------------------------------------------------------------------------------------------------------------------------------|------------------------------------------------------------------------------------------------------------------------------------------------------------------------------------------------------------------------------------------------------------------------------------------------------------------------------------------------------------------------------------------------------------------------------------------------------------------------------------------------------------------------------------------------------------------------------------------------------------------------------------------------------------------------------------------------------|--------------------------------------------------------------------------------------------------------------------------------------------------------------------------------------------------------------------------------------------------------------------------------------------------------------------------------------------------------------------------------------------------------------------------------|



|                                                                                                                                                                   |                                                       |                                                     |                                                                                                                                                                       |                                                                                                                                                                                                                                                                                                                                                                                                                                                                                 |
|-------------------------------------------------------------------------------------------------------------------------------------------------------------------|-------------------------------------------------------|-----------------------------------------------------|-----------------------------------------------------------------------------------------------------------------------------------------------------------------------|---------------------------------------------------------------------------------------------------------------------------------------------------------------------------------------------------------------------------------------------------------------------------------------------------------------------------------------------------------------------------------------------------------------------------------------------------------------------------------|
| 1<br>2<br>3<br>4<br>5<br>6<br>7<br>8<br>9<br>10<br>11<br>12<br>13<br>14<br>15<br>16<br>17<br>18<br>19<br>20<br>21<br>22<br>23<br>24<br>25<br>26<br>27<br>28<br>29 | <b>LIMITATIONS</b>                                    | Small sample, limited to a single geographic region | Due to differences in cultural practices and beliefs, perceptions and experiences of those in more rural and/or more traditional areas would need further exploration | Patients' perceptions were not compared to chart data; Caregivers were allowed to participate in lieu of patients, which may have reduced identification of some dissatisfying events; patients who did not speak English or Spanish were excluded and could have different experiences; it did not explore dissatisfaction in detail; patients may have been reluctant to report dissatisfaction to a member of hospital staff; there may have been other dissatisfying events |
| 30<br>31<br>32                                                                                                                                                    | <b>Author (year of publication)</b>                   | <b>Khresheh R. et al (2019) (a)</b>                 | <b>Pupulim J. S. L. et al (2012)</b>                                                                                                                                  | <b>Pomerantz S. C. et al (2006) (a)</b>                                                                                                                                                                                                                                                                                                                                                                                                                                         |
| 33                                                                                                                                                                | <b>Aims</b>                                           | 2                                                   | 2                                                                                                                                                                     | 2                                                                                                                                                                                                                                                                                                                                                                                                                                                                               |
| 34                                                                                                                                                                | <b>Methods</b>                                        | 2                                                   | 2                                                                                                                                                                     | 2                                                                                                                                                                                                                                                                                                                                                                                                                                                                               |
| 35                                                                                                                                                                | <b>Design and Methods</b>                             | 1                                                   | 2                                                                                                                                                                     | 2                                                                                                                                                                                                                                                                                                                                                                                                                                                                               |
| 36                                                                                                                                                                | <b>Recruitment strategy</b>                           | 2                                                   | 2                                                                                                                                                                     | 1                                                                                                                                                                                                                                                                                                                                                                                                                                                                               |
| 37                                                                                                                                                                | <b>Data collection</b>                                | 1                                                   | 2                                                                                                                                                                     | 1                                                                                                                                                                                                                                                                                                                                                                                                                                                                               |
| 38                                                                                                                                                                | <b>Bias and Reflexivity</b>                           | 1                                                   | 1                                                                                                                                                                     | 1                                                                                                                                                                                                                                                                                                                                                                                                                                                                               |
| 39                                                                                                                                                                | <b>Ethical issues</b>                                 | 2                                                   | 2                                                                                                                                                                     | 2                                                                                                                                                                                                                                                                                                                                                                                                                                                                               |
| 40                                                                                                                                                                | <b>Data analysis</b>                                  | 2                                                   | 1                                                                                                                                                                     | 2                                                                                                                                                                                                                                                                                                                                                                                                                                                                               |
| 41                                                                                                                                                                | <b>Statement of findings</b>                          | 2                                                   | 1                                                                                                                                                                     | 1                                                                                                                                                                                                                                                                                                                                                                                                                                                                               |
| 42                                                                                                                                                                | <b>Value and applicability</b>                        | 2                                                   | 2                                                                                                                                                                     | 2                                                                                                                                                                                                                                                                                                                                                                                                                                                                               |
| 43                                                                                                                                                                | <b>Total</b>                                          | <b>17</b>                                           | <b>17</b>                                                                                                                                                             | <b>16</b>                                                                                                                                                                                                                                                                                                                                                                                                                                                                       |
| 44                                                                                                                                                                | <b>Country (year of research and data collection)</b> | Jordan (?)                                          | Brazil (2007)                                                                                                                                                         | USA (?)                                                                                                                                                                                                                                                                                                                                                                                                                                                                         |
| 45                                                                                                                                                                | <b>Sample size</b>                                    | 21                                                  | 34                                                                                                                                                                    | 179                                                                                                                                                                                                                                                                                                                                                                                                                                                                             |
| 46<br>47<br>48<br>49<br>50<br>51<br>52<br>53<br>54<br>55<br>56<br>57<br>58<br>59<br>60                                                                            |                                                       |                                                     |                                                                                                                                                                       |                                                                                                                                                                                                                                                                                                                                                                                                                                                                                 |

1  
2  
3  
4  
5  
6  
7  
8  
9  
10  
11  
12  
13  
14  
15  
16  
17  
18  
19  
20  
21  
22  
23  
24  
25  
26  
27  
28  
29  
30  
31  
32  
33  
34  
35  
36  
37  
38  
39  
40  
41  
42  
43  
44  
45  
46  
47  
48  
49  
50  
51  
52  
53  
54  
55  
56  
57  
58  
59  
60

|                                                                          |                                           |                                                                                                                                                                                                                                                                                        |                                                                                                                                                                                                                                                                                                                                                                                                                                                                                                                                                                  |                                                                                                                                                                                                                                    |
|--------------------------------------------------------------------------|-------------------------------------------|----------------------------------------------------------------------------------------------------------------------------------------------------------------------------------------------------------------------------------------------------------------------------------------|------------------------------------------------------------------------------------------------------------------------------------------------------------------------------------------------------------------------------------------------------------------------------------------------------------------------------------------------------------------------------------------------------------------------------------------------------------------------------------------------------------------------------------------------------------------|------------------------------------------------------------------------------------------------------------------------------------------------------------------------------------------------------------------------------------|
| CASP Qualitative Studies Checklist (Critical Appraisal Skills Programme) | Type of samples                           | 21 postpartum inpatients                                                                                                                                                                                                                                                               | 34 (15 male and 19 female inpatients)                                                                                                                                                                                                                                                                                                                                                                                                                                                                                                                            | 179 inpatients                                                                                                                                                                                                                     |
|                                                                          | STRATEGIES/BEHAVIORS/OUTCOMES OF INTEREST | To improve women's feelings during childbirth (feeling frightened and losing control over birth process, feeling disrespected by staff, being treated as ignorant and feeling humiliated)                                                                                              | 1) To see the patient as a person, as a human being; 2) to respect patients' autonomy, to minimize feelings of objectification; 3) to respect the need for a place of their own                                                                                                                                                                                                                                                                                                                                                                                  | To assess the patient's willingness to have religious visits, to obtain consent to list a patient's religion to clergy; to assess the patient's sense of privacy violation                                                         |
|                                                                          | INTERVENTIONS TO ACHIEVE IMPROVEMENTS     | To be attentive and available to women; to avoid unnecessary exposure of genitals; to avoid examination by different staff; to help changing position; to assist with walking to the bathroom; not leaving women alone; to help reducing pain; adoption of respectful manners by staff | 1) To respect patients' feelings, reactions, and privacy, to care for and to treat them well; maintenance of dignity and privacy are seen as markers of a good quality of assistance; to respect patients' self-determination; 2) to ask permission to examine, to touch the patients' body or to perform any procedure, to allow patients' decision about when to be touched, to give choices; 3) to allow seclusion and tranquility, an attempt to preserve and rescue individuality, to respect privacy when using the bathroom, to guarantee confidentiality | To respect patient's rights and desires; to respect patient privacy; not to address a patient's religion without consent; to ask for patient's consent to allow religious visits; no to list a patient's religion unless consented |

|                                                                                                                                                                                                                                         |                                                       |                                                                                                                                                                                                                                                                                                                                                                                                                                                                                                                                                                                                                                                                                                    |                                                                                                                                                                                                                                                                                                                                                                                                                                                                                                                                              |                                                                                                                                                                                                                                                                                                                                                                                                                                                                                                                                                                                                                                                                                                                                                                                                                                                                                                                                                                |
|-----------------------------------------------------------------------------------------------------------------------------------------------------------------------------------------------------------------------------------------|-------------------------------------------------------|----------------------------------------------------------------------------------------------------------------------------------------------------------------------------------------------------------------------------------------------------------------------------------------------------------------------------------------------------------------------------------------------------------------------------------------------------------------------------------------------------------------------------------------------------------------------------------------------------------------------------------------------------------------------------------------------------|----------------------------------------------------------------------------------------------------------------------------------------------------------------------------------------------------------------------------------------------------------------------------------------------------------------------------------------------------------------------------------------------------------------------------------------------------------------------------------------------------------------------------------------------|----------------------------------------------------------------------------------------------------------------------------------------------------------------------------------------------------------------------------------------------------------------------------------------------------------------------------------------------------------------------------------------------------------------------------------------------------------------------------------------------------------------------------------------------------------------------------------------------------------------------------------------------------------------------------------------------------------------------------------------------------------------------------------------------------------------------------------------------------------------------------------------------------------------------------------------------------------------|
| <p>1<br/>2<br/>3<br/>4<br/>5<br/>6<br/>7<br/>8<br/>9<br/>10<br/>11<br/>12<br/>13<br/>14<br/>15<br/>16<br/>17<br/>18<br/>19<br/>20<br/>21<br/>22<br/>23<br/>24<br/>25<br/>26<br/>27<br/>28<br/>29<br/>30<br/>31<br/>32<br/>33<br/>34</p> | <p style="text-align: center;"><b>RESULTS</b></p>     | <p>Three main themes were identified: (1) Women's feelings during childbirth: they felt frightened, humiliated, ignored, and disrespected. Negative actions in term of tangible or physical non-caring behaviours and emotional behaviours were reported. (2) Women's perceptions of the caring behaviours of midwives during childbirth: women had negative experiences during childbirth, they reported disrespectful manners and physical and empathetic abandonment by midwives during childbirth. (3) Women's preferred caring behaviours: women wanted the midwives to listen to what they say, to demonstrate respect for them, and be truly 'present' for women when they needed them.</p> | <p>The subjects pointed out behavioral factors, which contribute or not for the protection and maintenance of the privacy in the hospital, highlighting respect as the most important aspect, followed by personal control over situations that violate privacy. Patients believe that privacy is linked to dignity and respect, depends on the demarcation of the personal/territorial space and the autonomy's security; and that these concepts and attitudes are connected and essential to protect privacy in the hospital context.</p> | <p>Most respondents were women, had a high-school education or less and almost half had not been admitted to hospital previously, were part of an organised religion and described themselves as somewhat or very religious, would not want to be listed by religion and did not think hospitals should give lists to the clergy without their consent. In all, 84% would welcome a visit by their own clergy even if it were triggered by the list. Only 47% thought their sense of privacy would be violated by the hospital disclosing their name, whereas most thought disclosure violated patients' privacy rights; of those who wanted their name listed by religion, 17% thought their sense of privacy would be violated by the hospital disclosing their admission and religion to clergy without their permission and 35% thought the hospital giving clergy the list of names without permission was a violation of patients' rights to privacy</p> |
| <p>35<br/>36<br/>37<br/>38<br/>39<br/>40<br/>41<br/>42<br/>43<br/>44<br/>45<br/>46<br/>47<br/>48<br/>49</p>                                                                                                                             | <p style="text-align: center;"><b>LIMITATIONS</b></p> | <p>Only one hospital, cannot reflect the perceptions of women all over Jordan; did not include women who had emergency caesarean birth; women who did not participate may have different experiences, did not cite data collection time frame</p>                                                                                                                                                                                                                                                                                                                                                                                                                                                  | <p>Patients' perceptions may vary among different regions, and cultures</p>                                                                                                                                                                                                                                                                                                                                                                                                                                                                  | <p>The sample may not be representative of the patients admitted to the hospital, as those who consented to be interviewed may be biased towards those who are more religious and, therefore, more interested in this issue; key questions regarding privacy rights were asked at the end of a long interview. It is not clear whether fatigue influenced those responses</p>                                                                                                                                                                                                                                                                                                                                                                                                                                                                                                                                                                                  |

| <b>Dzomeku V.M. et al (2017)</b> | <b>Wei H. et al (2019)</b>                    | <b>Widäng I et al (2003)</b>                                    | <b>Haskins L. et al (2019)</b>      |
|----------------------------------|-----------------------------------------------|-----------------------------------------------------------------|-------------------------------------|
| 2                                | 2                                             | 2                                                               | 2                                   |
| 2                                | 2                                             | 2                                                               | 2                                   |
| 2                                | 2                                             | 2                                                               | 2                                   |
| 2                                | 2                                             | 2                                                               | 1                                   |
| 2                                | 2                                             | 2                                                               | 2                                   |
| 1                                | 1                                             | 1                                                               | 1                                   |
| 2                                | 2                                             | 2                                                               | 2                                   |
| 2                                | 2                                             | 2                                                               | 2                                   |
| 2                                | 2                                             | 2                                                               | 2                                   |
| 2                                | 2                                             | 2                                                               | 2                                   |
| 19                               | 19                                            | 19                                                              | 18                                  |
| Ghana (2014-2015)                | China (2015-2017)                             | Sweden (2000-2001)                                              | South Africa (2015-2016)            |
| 56                               | 127                                           | 17                                                              | 44                                  |
| 56 antenatal and postnatal women | 127 (49.6% males, 45.7% females, 4.7% unsure) | 17 patients (10 in the surgical ward and 7 in the medical ward) | 24 mothers, 20 healthcare providers |

|                                                                                                                                                                                                                                                                                                                                                                                                                                 |                                                                                                                                                                                                                                                                                                                                                                                                                                                                       |                                                                                                                                                                                                                                                                                                                                                                                                                                                                                                                                                                                                                                                                               |                                                                                                                                                                                                                                                                                                                                                                                                                                                                   |
|---------------------------------------------------------------------------------------------------------------------------------------------------------------------------------------------------------------------------------------------------------------------------------------------------------------------------------------------------------------------------------------------------------------------------------|-----------------------------------------------------------------------------------------------------------------------------------------------------------------------------------------------------------------------------------------------------------------------------------------------------------------------------------------------------------------------------------------------------------------------------------------------------------------------|-------------------------------------------------------------------------------------------------------------------------------------------------------------------------------------------------------------------------------------------------------------------------------------------------------------------------------------------------------------------------------------------------------------------------------------------------------------------------------------------------------------------------------------------------------------------------------------------------------------------------------------------------------------------------------|-------------------------------------------------------------------------------------------------------------------------------------------------------------------------------------------------------------------------------------------------------------------------------------------------------------------------------------------------------------------------------------------------------------------------------------------------------------------|
| <p>Disrespectful care; inadequate communication and involvement in decision-making; experiences of empathetic support; experiences of continuous labour support and attention</p>                                                                                                                                                                                                                                               | <p>Uncompassionate attitudes, unprofessional communication, disrespect of patients rights, unsatisfactory quality of nursing care</p>                                                                                                                                                                                                                                                                                                                                 | <p><b>Self-respect</b> (having control over yourself and the situation; having the courage to set boundaries; being alone; having self-belief); <b>Dignity</b> (being seen as a whole person; being respected; being seen as trustworthy); <b>Confidence</b> (keeping information confidential; trusting the professionals; having a balance between one's own desires and those of others; participating; being free)</p>                                                                                                                                                                                                                                                    | <p>Provide timely care; communicate clearly, friendly and respectfully; to stimulate women to participate in care</p>                                                                                                                                                                                                                                                                                                                                             |
| <p>Ability to understand life experiences; demonstration of concern and empathy; to be with mothers throughout their labour period; to have spouses and relatives with mothers; emotional and comforting measures, information and advocacy; improve communication, involve patients and families in decision-making; to institute quality assurance methods; education of healthcare professionals on patient-centred care</p> | <p>To be constructive and helpful; to show respect for humanity and ethics; to maintain a positive and compassionate attitude and respect patient humanity; to be fair to all patients, respect human dignity, and explain information understandably and respectfully; to fully inform patients about his/her treatment plans and the medications and procedures given and undergoing; to be competent and empathetic in nursing care; improve nursing education</p> | <p>Allow patients to gain control; to tell a caregiver that one's feeling at risk of having his/her integrity violated; to allow patients to be alone, in privacy; to allow the patient to be responsible for himself; to see patients as a whole person; not to objectify patients; to respect patients' wishes and follow their instructions; to respect confidentiality; to show a high level of knowledge, be involved, have good communication skills and show empathy; to balance demands from patients with those from health care; to involve patients in the decision-making process; recognise patients' independence and allow them to take care of themselves</p> | <p>To be attentive to patients needs; to be friendly, to provide clear information, to clear mothers' doubts, to listen to mothers' concerns; to include mothers in decision-making process; to ask for consent; to involve women by allowing them to ask questions, to care for their babies, to give clear instructions about infections and protocols for infectious diseases in neonatal units; to stimulate women to be actively caring for their babies</p> |

|                                                                                                                                                                                                                                                                                                                                                                                                                                                                                                                                                                                                                                                                                                             |                                                                                                                                                                                                                                                                                                                                                                                                                                                                                                                                                                                                                                                                                                                                                                                                                                                                                                                                                                                                                                                                                                                 |                                                                                                                                                                                                                                                                                                                                                                                                                                                                                                                                                                                                                                                                                                                                                                                                                                                                                                                                                                                                                                                |                                                                                                                                                                                                                                                                                                                                                                                                                                                                                                                                                                                                                                                                                                                 |
|-------------------------------------------------------------------------------------------------------------------------------------------------------------------------------------------------------------------------------------------------------------------------------------------------------------------------------------------------------------------------------------------------------------------------------------------------------------------------------------------------------------------------------------------------------------------------------------------------------------------------------------------------------------------------------------------------------------|-----------------------------------------------------------------------------------------------------------------------------------------------------------------------------------------------------------------------------------------------------------------------------------------------------------------------------------------------------------------------------------------------------------------------------------------------------------------------------------------------------------------------------------------------------------------------------------------------------------------------------------------------------------------------------------------------------------------------------------------------------------------------------------------------------------------------------------------------------------------------------------------------------------------------------------------------------------------------------------------------------------------------------------------------------------------------------------------------------------------|------------------------------------------------------------------------------------------------------------------------------------------------------------------------------------------------------------------------------------------------------------------------------------------------------------------------------------------------------------------------------------------------------------------------------------------------------------------------------------------------------------------------------------------------------------------------------------------------------------------------------------------------------------------------------------------------------------------------------------------------------------------------------------------------------------------------------------------------------------------------------------------------------------------------------------------------------------------------------------------------------------------------------------------------|-----------------------------------------------------------------------------------------------------------------------------------------------------------------------------------------------------------------------------------------------------------------------------------------------------------------------------------------------------------------------------------------------------------------------------------------------------------------------------------------------------------------------------------------------------------------------------------------------------------------------------------------------------------------------------------------------------------------|
| <p>1<br/>2<br/>3<br/>4 Mothers had both<br/>5 encouraging and<br/>6 discouraging<br/>7 experiences during<br/>8 care, which<br/>9 influenced their<br/>10 willingness to seek<br/>11 assisted health<br/>12 care during<br/>13 childbirth in the<br/>14 future. Participants<br/>15 who had<br/>16 experiences of<br/>17 empathetic support<br/>18 and continuous<br/>19 labour support and<br/>20 attention reported<br/>21 these to be<br/>22 encouraging. Other<br/>23 participants<br/>24 reported<br/>25 discouraging<br/>26 experiences such<br/>27 as disrespectful<br/>28 care and<br/>29 inadequate<br/>30 communication<br/>31 and involvement in<br/>32 care decisions.<br/>33<br/>34<br/>35</p> | <p>Uncompassionate attitudes were categorized when patients/families did not feel that nurses showed empathy or concerns for patients, or when patients/families felt that nurses treated them in a way that was negative, destructive, or aggressive; nurses' attitude and demeanor directly affect patients' perceptions of the quality of patient care and the kindness—benevolence—of the organization; unprofessional communication was characterized when patients/families perceived that nurses lacked the use of proper language, tone, choice of words, or facial/body expressions when talking to patients and families; patients felt that being able to understand a procedure and make an informed decision was a critical patient right; when incongruency occurs between patients' expectations for care and the care that they receive, patients are dissatisfied, and patients' complaints may occur; most of the times patients' complaints are not triggered by their perceptions of substandard care, but by nurses' uncompassionate attitudes or unprofessional communication skills.</p> | <p>To develop emotion-focused coping-strategies, which might transform negative events into positive ones, minimizing the risk of perceiving events as violating, problem-focused coping-strategies, like creating alternative solutions or considering alternatives in terms of their costs and benefits, can be found in different actions (seeking more information and support from caregivers or other patients or selecting the caregiver who best suits the patient); to allow withdrawing in a physical as well as psychological sense; to treat the patients in a way that he can feel his integrity is being preserved, to respect him a whole person; to improve mutual confidence between patient and caregiver, to maintain a high level of confidentiality, increasing patients' trust in caregivers; to allow patients to set boundaries during diagnostic or therapeutic procedures to balance patients' and caregivers desires; to allow patients to participate in decision-making process, to allow patients to be free</p> | <p>The importance of information sharing between healthcare workers (HWs) and mothers of babies, contrasting the positive communication reported by many mothers which led to them feeling empowered and participating actively in the care of their babies, with incidents of poor communication; poor communication, rudeness and disrespectful behavior of HWs was frequently described by mothers, and led to mothers feeling anxious, unwilling to ask questions and excluded from their baby's care; poor communication and misunderstandings led to serious mismanagement of babies with HWs delaying or withholding care, or to mothers putting their babies at risk by not following instructions.</p> |
|-------------------------------------------------------------------------------------------------------------------------------------------------------------------------------------------------------------------------------------------------------------------------------------------------------------------------------------------------------------------------------------------------------------------------------------------------------------------------------------------------------------------------------------------------------------------------------------------------------------------------------------------------------------------------------------------------------------|-----------------------------------------------------------------------------------------------------------------------------------------------------------------------------------------------------------------------------------------------------------------------------------------------------------------------------------------------------------------------------------------------------------------------------------------------------------------------------------------------------------------------------------------------------------------------------------------------------------------------------------------------------------------------------------------------------------------------------------------------------------------------------------------------------------------------------------------------------------------------------------------------------------------------------------------------------------------------------------------------------------------------------------------------------------------------------------------------------------------|------------------------------------------------------------------------------------------------------------------------------------------------------------------------------------------------------------------------------------------------------------------------------------------------------------------------------------------------------------------------------------------------------------------------------------------------------------------------------------------------------------------------------------------------------------------------------------------------------------------------------------------------------------------------------------------------------------------------------------------------------------------------------------------------------------------------------------------------------------------------------------------------------------------------------------------------------------------------------------------------------------------------------------------------|-----------------------------------------------------------------------------------------------------------------------------------------------------------------------------------------------------------------------------------------------------------------------------------------------------------------------------------------------------------------------------------------------------------------------------------------------------------------------------------------------------------------------------------------------------------------------------------------------------------------------------------------------------------------------------------------------------------------|

|    |                                             |                                                                                       |                                         |                                                                                                                                                                                                                                                                                                                                                                                                                                                                                                                                  |
|----|---------------------------------------------|---------------------------------------------------------------------------------------|-----------------------------------------|----------------------------------------------------------------------------------------------------------------------------------------------------------------------------------------------------------------------------------------------------------------------------------------------------------------------------------------------------------------------------------------------------------------------------------------------------------------------------------------------------------------------------------|
| 1  |                                             |                                                                                       |                                         |                                                                                                                                                                                                                                                                                                                                                                                                                                                                                                                                  |
| 2  |                                             |                                                                                       |                                         |                                                                                                                                                                                                                                                                                                                                                                                                                                                                                                                                  |
| 3  |                                             |                                                                                       |                                         |                                                                                                                                                                                                                                                                                                                                                                                                                                                                                                                                  |
| 4  |                                             |                                                                                       |                                         |                                                                                                                                                                                                                                                                                                                                                                                                                                                                                                                                  |
| 5  |                                             |                                                                                       |                                         |                                                                                                                                                                                                                                                                                                                                                                                                                                                                                                                                  |
| 6  |                                             |                                                                                       |                                         |                                                                                                                                                                                                                                                                                                                                                                                                                                                                                                                                  |
| 7  |                                             |                                                                                       |                                         |                                                                                                                                                                                                                                                                                                                                                                                                                                                                                                                                  |
| 8  |                                             |                                                                                       |                                         |                                                                                                                                                                                                                                                                                                                                                                                                                                                                                                                                  |
| 9  |                                             |                                                                                       |                                         |                                                                                                                                                                                                                                                                                                                                                                                                                                                                                                                                  |
| 10 |                                             |                                                                                       |                                         |                                                                                                                                                                                                                                                                                                                                                                                                                                                                                                                                  |
| 11 |                                             |                                                                                       |                                         |                                                                                                                                                                                                                                                                                                                                                                                                                                                                                                                                  |
| 12 |                                             |                                                                                       |                                         |                                                                                                                                                                                                                                                                                                                                                                                                                                                                                                                                  |
| 13 |                                             |                                                                                       |                                         |                                                                                                                                                                                                                                                                                                                                                                                                                                                                                                                                  |
| 14 | Small sample,<br>limited geographic<br>area | Limited understanding of patients'<br>complaints in depth; limited geographic<br>area | Only men were included, small<br>sample | Exclusion of very small<br>hospitals for logistic<br>reasons; did not conduct<br>observation during evening<br>or night shifts or observe<br>healthcare workers on duty<br>after hours; fathers were<br>not included; the presence<br>of the observer may have<br>changed the behavior of the<br>participants; mothers may<br>have avoided to criticise the<br>care received while their<br>babies were still admitted in<br>the unit; healthcare workers<br>may not have felt able to<br>speak about colleagues<br>and managers |
| 15 |                                             |                                                                                       |                                         |                                                                                                                                                                                                                                                                                                                                                                                                                                                                                                                                  |
| 16 |                                             |                                                                                       |                                         |                                                                                                                                                                                                                                                                                                                                                                                                                                                                                                                                  |
| 17 |                                             |                                                                                       |                                         |                                                                                                                                                                                                                                                                                                                                                                                                                                                                                                                                  |
| 18 |                                             |                                                                                       |                                         |                                                                                                                                                                                                                                                                                                                                                                                                                                                                                                                                  |
| 19 |                                             |                                                                                       |                                         |                                                                                                                                                                                                                                                                                                                                                                                                                                                                                                                                  |
| 20 |                                             |                                                                                       |                                         |                                                                                                                                                                                                                                                                                                                                                                                                                                                                                                                                  |
| 21 |                                             |                                                                                       |                                         |                                                                                                                                                                                                                                                                                                                                                                                                                                                                                                                                  |
| 22 |                                             |                                                                                       |                                         |                                                                                                                                                                                                                                                                                                                                                                                                                                                                                                                                  |
| 23 |                                             |                                                                                       |                                         |                                                                                                                                                                                                                                                                                                                                                                                                                                                                                                                                  |
| 24 |                                             |                                                                                       |                                         |                                                                                                                                                                                                                                                                                                                                                                                                                                                                                                                                  |
| 25 |                                             |                                                                                       |                                         |                                                                                                                                                                                                                                                                                                                                                                                                                                                                                                                                  |
| 26 |                                             |                                                                                       |                                         |                                                                                                                                                                                                                                                                                                                                                                                                                                                                                                                                  |
| 27 |                                             |                                                                                       |                                         |                                                                                                                                                                                                                                                                                                                                                                                                                                                                                                                                  |
| 28 |                                             |                                                                                       |                                         |                                                                                                                                                                                                                                                                                                                                                                                                                                                                                                                                  |
| 29 |                                             |                                                                                       |                                         |                                                                                                                                                                                                                                                                                                                                                                                                                                                                                                                                  |
| 30 | <b>Mohammadi E. et<br/>al (2017)</b>        | <b>Thommesen T. et al (2020)</b>                                                      | <b>Tsai Y. F. et al (2020)</b>          | <b>Gebremichael M.W. et al<br/>(2018) (a)</b>                                                                                                                                                                                                                                                                                                                                                                                                                                                                                    |
| 31 |                                             |                                                                                       |                                         |                                                                                                                                                                                                                                                                                                                                                                                                                                                                                                                                  |
| 32 |                                             |                                                                                       |                                         |                                                                                                                                                                                                                                                                                                                                                                                                                                                                                                                                  |
| 33 | 2                                           | 2                                                                                     | 1                                       | 2                                                                                                                                                                                                                                                                                                                                                                                                                                                                                                                                |
| 34 | 2                                           | 2                                                                                     | 1                                       | 1                                                                                                                                                                                                                                                                                                                                                                                                                                                                                                                                |
| 35 | 2                                           | 2                                                                                     | 1                                       | 1                                                                                                                                                                                                                                                                                                                                                                                                                                                                                                                                |
| 36 | 2                                           | 1                                                                                     | 2                                       | 1                                                                                                                                                                                                                                                                                                                                                                                                                                                                                                                                |
| 37 | 2                                           | 2                                                                                     | 2                                       | 1                                                                                                                                                                                                                                                                                                                                                                                                                                                                                                                                |
| 38 | 1                                           | 1                                                                                     | 1                                       | 1                                                                                                                                                                                                                                                                                                                                                                                                                                                                                                                                |
| 39 | 2                                           | 1                                                                                     | 2                                       | 2                                                                                                                                                                                                                                                                                                                                                                                                                                                                                                                                |
| 40 | 1                                           | 2                                                                                     | 1                                       | 2                                                                                                                                                                                                                                                                                                                                                                                                                                                                                                                                |
| 41 | 1                                           | 1                                                                                     | 2                                       | 2                                                                                                                                                                                                                                                                                                                                                                                                                                                                                                                                |
| 42 | 1                                           | 2                                                                                     | 2                                       | 2                                                                                                                                                                                                                                                                                                                                                                                                                                                                                                                                |
| 43 | <b>16</b>                                   | <b>16</b>                                                                             | <b>15</b>                               | <b>15</b>                                                                                                                                                                                                                                                                                                                                                                                                                                                                                                                        |
| 44 |                                             |                                                                                       |                                         |                                                                                                                                                                                                                                                                                                                                                                                                                                                                                                                                  |
| 45 | Iran (2009-2012)                            | Afghanistan (2017)                                                                    | Indonesia (2016-2017)                   | Ethiopia (?)                                                                                                                                                                                                                                                                                                                                                                                                                                                                                                                     |
| 46 |                                             |                                                                                       |                                         |                                                                                                                                                                                                                                                                                                                                                                                                                                                                                                                                  |
| 47 | 29                                          | 39                                                                                    | 75                                      | 62                                                                                                                                                                                                                                                                                                                                                                                                                                                                                                                               |
| 48 |                                             |                                                                                       |                                         |                                                                                                                                                                                                                                                                                                                                                                                                                                                                                                                                  |
| 49 |                                             |                                                                                       |                                         |                                                                                                                                                                                                                                                                                                                                                                                                                                                                                                                                  |
| 50 |                                             |                                                                                       |                                         |                                                                                                                                                                                                                                                                                                                                                                                                                                                                                                                                  |
| 51 |                                             |                                                                                       |                                         |                                                                                                                                                                                                                                                                                                                                                                                                                                                                                                                                  |
| 52 |                                             |                                                                                       |                                         |                                                                                                                                                                                                                                                                                                                                                                                                                                                                                                                                  |
| 53 |                                             |                                                                                       |                                         |                                                                                                                                                                                                                                                                                                                                                                                                                                                                                                                                  |
| 54 |                                             |                                                                                       |                                         |                                                                                                                                                                                                                                                                                                                                                                                                                                                                                                                                  |
| 55 |                                             |                                                                                       |                                         |                                                                                                                                                                                                                                                                                                                                                                                                                                                                                                                                  |
| 56 |                                             |                                                                                       |                                         |                                                                                                                                                                                                                                                                                                                                                                                                                                                                                                                                  |
| 57 |                                             |                                                                                       |                                         |                                                                                                                                                                                                                                                                                                                                                                                                                                                                                                                                  |
| 58 |                                             |                                                                                       |                                         |                                                                                                                                                                                                                                                                                                                                                                                                                                                                                                                                  |
| 59 |                                             |                                                                                       |                                         |                                                                                                                                                                                                                                                                                                                                                                                                                                                                                                                                  |
| 60 |                                             |                                                                                       |                                         |                                                                                                                                                                                                                                                                                                                                                                                                                                                                                                                                  |

|                                                                                                                                                                                                                                                                       |                                                                                                                                                                                                                                                                                                                                                                                                                                                                                                                                                                                                                                                                            |                                                                                                                                                                                                                                                                                |                                                                                                                                                                                                                                                                                                                                                                                                                              |
|-----------------------------------------------------------------------------------------------------------------------------------------------------------------------------------------------------------------------------------------------------------------------|----------------------------------------------------------------------------------------------------------------------------------------------------------------------------------------------------------------------------------------------------------------------------------------------------------------------------------------------------------------------------------------------------------------------------------------------------------------------------------------------------------------------------------------------------------------------------------------------------------------------------------------------------------------------------|--------------------------------------------------------------------------------------------------------------------------------------------------------------------------------------------------------------------------------------------------------------------------------|------------------------------------------------------------------------------------------------------------------------------------------------------------------------------------------------------------------------------------------------------------------------------------------------------------------------------------------------------------------------------------------------------------------------------|
| 18 patients, 11 members of their families                                                                                                                                                                                                                             | 25 postpartum patients, 11 mothers-in-law, 3 community midwives                                                                                                                                                                                                                                                                                                                                                                                                                                                                                                                                                                                                            | 35 inpatients (18 male, 17 female); 40 registered nurses (17 male, 23 female)                                                                                                                                                                                                  | 62 women post-delivery                                                                                                                                                                                                                                                                                                                                                                                                       |
| Deprivation of the caregiver's presence; delay/lack of appropriate responses to the needs; receiving mechanical care (superficiality, lack of affection, failure to understand the situation); being disrespected (humility, aggression)                              | Decisions on where to give birth, access to health facilities, and receiving and evaluating midwifery care                                                                                                                                                                                                                                                                                                                                                                                                                                                                                                                                                                 | Discrimination, negligence, impoliteness, dismissal, inattentiveness                                                                                                                                                                                                           | To be friendly, polite, avoid disrespect, to avoid abandonment, to avoid junior providers to perform unsupervised, to treat as adult, to allow women to have privacy, to avoid worries about pregnancy outcomes, to avoid unnecessary vaginal examinations, to avoid shortages, avoid abandonment and neglect, cultural respect, avoid dirt                                                                                  |
| Provision of timely and appropriate needs, provide genuine care (knowledge, attention, emotion, and understanding), know the patient well, alleviate suffering, find appropriate ways to communicate, to show compassion, provide emotional support, to be respectful | Education to women, information about pregnancy and birth; improve access to basic and emergency obstetric care; integrate cultural sensitivity and respect for privacy and intimacy into health professionals' education; environmental control (hygiene and cleanliness); respect for privacy and intimacy; promote early breastfeeding; promote communication between women and midwives; provide familiar professional midwife care; provision of cheap equipment (e.g. curtains), ensuring a minimum level of comfort, privacy and dignity; provide resources (drugs and equipment) and human resources; train professionals on empathic and respectful communication | Improve responsiveness time; improve communication skills in order to provide compassionate care; avoid harm to a patient during treatments and interventions; encourage exchange of nurse-patient information; treat patients equally/do not discriminate; show attentiveness | To be supportive, friendly, polite, to stay for patients needs, to communicate results of examinations, to avoid infantilization, to respect privacy, to give clear information, to examine in private and not that frequently, to avoid shortages of consumable materials, staff and water, to avoid verbal and physical abuse, to be attentive, to allow companionship, to respect cultural practices, improve cleanliness |



|                                                                                                                                                                                                                                                                                                                                                                                                              |                                                                                                                                                                                                                                                                                                                                                                                                                                                                                                                                                                                                                                                                                                                                                                                                                                                                                                                                                                                                                                                                                                                                                                                            |                                                                                                                                                                                                                                                                                                                                                                                                                                                                                                                                                                                                                                                                                                                                                                                                                                                                                                                                                                                                                                              |                                                                                                                                                                                                                                                                                                                                                                                                                                                                                                                                                                                      |
|--------------------------------------------------------------------------------------------------------------------------------------------------------------------------------------------------------------------------------------------------------------------------------------------------------------------------------------------------------------------------------------------------------------|--------------------------------------------------------------------------------------------------------------------------------------------------------------------------------------------------------------------------------------------------------------------------------------------------------------------------------------------------------------------------------------------------------------------------------------------------------------------------------------------------------------------------------------------------------------------------------------------------------------------------------------------------------------------------------------------------------------------------------------------------------------------------------------------------------------------------------------------------------------------------------------------------------------------------------------------------------------------------------------------------------------------------------------------------------------------------------------------------------------------------------------------------------------------------------------------|----------------------------------------------------------------------------------------------------------------------------------------------------------------------------------------------------------------------------------------------------------------------------------------------------------------------------------------------------------------------------------------------------------------------------------------------------------------------------------------------------------------------------------------------------------------------------------------------------------------------------------------------------------------------------------------------------------------------------------------------------------------------------------------------------------------------------------------------------------------------------------------------------------------------------------------------------------------------------------------------------------------------------------------------|--------------------------------------------------------------------------------------------------------------------------------------------------------------------------------------------------------------------------------------------------------------------------------------------------------------------------------------------------------------------------------------------------------------------------------------------------------------------------------------------------------------------------------------------------------------------------------------|
| <p>The patients' rights were violated in a variety of ways. There were three main dimensions to this issue: (a) care recession including deprivation of the caregiver's presence and the delay/lack of needed responses; (b) receiving mechanical care including superficiality, lack of emotion, and failure to understand the situation; and (c) being disrespected including humility and aggression.</p> | <p>Whilst most of the women were aware of the benefits of midwifery care, it turned out that not all of them used such a service; a number of women managed to look after themselves during labour and childbirth, and stated that they did not need or want midwifery care; most of the older informants stated during the focus-group discussions that it is best to give birth at home, and that giving birth in a health facility is a modern practice they did not feel confident with; some women, regardless of their age, felt confident about coping with childbirth on their own; such cultural attitudes may on the one hand reflect resilience, but on the other hand represent barriers to safe childbirth in the event of unexpected problems and emergencies; some women expressed that they would have opted for the clinic but were not allowed to do so by their husbands or in-laws; according to Islamic tradition Afghan women need permission from and accompaniment by a close male family member – a Mahram – in order to seek professional health care and to go to a health facility, husbands and in-laws did not consent to women giving birth in a clinic</p> | <p><b>Similarities of viewpoints between nurses and patients:</b> Negligence: prolonged wait times for care, which they perceived as unresponsive; nurses as being disrespectful, which caused pain and suffering. Impoliteness: use of a loud, high-pitched voice by Indonesian nurses was considered yelling; both nurses and patients interpreted this as impolite and inappropriate; nurses administered treatments roughly and without regard for the discomfort they might be causing the patient. Dismissal: patients were not provided with information or explanations they required. <b>Dissimilarities of viewpoints between nurses and patients:</b> Discrimination: patients perceived they were being treated less than equal to other patients, which threatened their dignity; they worried that being admitted to the hospital and paying with healthcare insurance resulted in a poorer quality of care than for patients able to pay privately. Inattentiveness: perceived by nurses to be disrespectful to patients.</p> | <p>The study participants described disrespect and abuse as serious obstacles to utilization of maternal health services. Women reported experiencing feelings of being infantilized, losing self-control, being overlooked, being informed bad news without proper preparation, repeated examination without being properly communicated/ informed, disallow companions, and left unattended during labor. Facility related issues include women's perception of incompetence of professionals attending delivery, unhygienic facilities, and unavailability of basic supplies.</p> |
| <p>The patterns are dependent on the context in a qualitative research</p>                                                                                                                                                                                                                                                                                                                                   | <p>Main researcher could not run the interviews herself for security reasons; use of local research assistants with limited experience in qualitative research; women in this study could be more in favor of the program than others; data collectors may have been biased in their choice of respondents; details may have been lost in translation from Dari/Pashto into English; female data collectors had issues with transport, security and limited time frame</p>                                                                                                                                                                                                                                                                                                                                                                                                                                                                                                                                                                                                                                                                                                                 | <p>Design of the study; did not employ in-depth interviews for data collection; did not quantify the frequency of disrespectful behaviors</p>                                                                                                                                                                                                                                                                                                                                                                                                                                                                                                                                                                                                                                                                                                                                                                                                                                                                                                | <p>Cannot be generalized, did not cite data collection time frame</p>                                                                                                                                                                                                                                                                                                                                                                                                                                                                                                                |

| Hussein S. A. A. et al (2019)                                                                                              | Hernández-Martínez A et al (2019) (a) |
|----------------------------------------------------------------------------------------------------------------------------|---------------------------------------|
| 2                                                                                                                          | 2                                     |
| 2                                                                                                                          | 2                                     |
| 2                                                                                                                          | 2                                     |
| 2                                                                                                                          | 2                                     |
| 2                                                                                                                          | 2                                     |
| 1                                                                                                                          | 1                                     |
| 2                                                                                                                          | 1                                     |
| 2                                                                                                                          | 2                                     |
| 1                                                                                                                          | 2                                     |
| 2                                                                                                                          | 2                                     |
| 2                                                                                                                          | 2                                     |
| 18                                                                                                                         | 18                                    |
| Jordan and Australia (2017/2018)                                                                                           | Spain (?)                             |
| 27                                                                                                                         | 32                                    |
| 27 Jordanian women (Recent Mothers, RM; Experienced Mothers, EM; Australian Jordanian Mothers, AJM) (12 RM, 08 EM, 07 AJM) | 32 women                              |

1  
2  
3  
4  
5  
6  
7  
8  
9  
10  
11  
12  
13  
14  
15  
16  
17  
18  
19  
20  
21  
22  
23  
24  
25  
26  
27  
28  
29  
30  
31  
32  
33  
34  
35  
36  
37  
38  
39  
40  
41  
42  
43  
44  
45  
46  
47  
48  
49  
50  
51  
52  
53  
54  
55  
56  
57  
58  
59  
60

|                                                                                                                                                                                                                                                                                                                                                                                                                                                                  |                                                                                                                                                                                                                                                                                                                                                                                                                                                                               |
|------------------------------------------------------------------------------------------------------------------------------------------------------------------------------------------------------------------------------------------------------------------------------------------------------------------------------------------------------------------------------------------------------------------------------------------------------------------|-------------------------------------------------------------------------------------------------------------------------------------------------------------------------------------------------------------------------------------------------------------------------------------------------------------------------------------------------------------------------------------------------------------------------------------------------------------------------------|
| <p>To improve privacy and dignity</p>                                                                                                                                                                                                                                                                                                                                                                                                                            | <p>Birth plan compliance, obstetric problems, mother-infant bond, emotional wounds, perinatal experiences</p>                                                                                                                                                                                                                                                                                                                                                                 |
| <p>One professional to examine patients during labor and birth; female professionals, especially during vaginal examination; to address women's needs for respect and privacy; not having doors opened directly into the birthing room; using physical barriers when the door is opened; to cover with a simple sheet; shielding women from visitors; limiting the number of attendants present; train professionals to protect and maintain women's privacy</p> | <p>Give explanation and medical reasons why; introduce oneself, look patients in the eyes, explain the procedures; make sure women are properly informed; wait the correct time for medication to take full effect; reinforce breastfeeding over artificial feeding; pregnancy and breastfeeding support groups; focus on giving more information on the processes; focus on training women, their partners and close family; obtain consent, be attentive and supportive</p> |

|                                                                                                                                                                                                                                                                                                                                                                                                                                                                                                                                                                                                                                                                                                                                                                                                                                                                                                                                                                                                                                                                                                                                          |                                                                                                                                                                                                                                                                                                                                                                                                                                                                                                                                                                                                                                                                                                                                               |
|------------------------------------------------------------------------------------------------------------------------------------------------------------------------------------------------------------------------------------------------------------------------------------------------------------------------------------------------------------------------------------------------------------------------------------------------------------------------------------------------------------------------------------------------------------------------------------------------------------------------------------------------------------------------------------------------------------------------------------------------------------------------------------------------------------------------------------------------------------------------------------------------------------------------------------------------------------------------------------------------------------------------------------------------------------------------------------------------------------------------------------------|-----------------------------------------------------------------------------------------------------------------------------------------------------------------------------------------------------------------------------------------------------------------------------------------------------------------------------------------------------------------------------------------------------------------------------------------------------------------------------------------------------------------------------------------------------------------------------------------------------------------------------------------------------------------------------------------------------------------------------------------------|
| <p>1<br/>2<br/>3<br/>4<br/>5<br/>6<br/>7<br/>8 Seeking a birth in a private hospital in<br/>9 Jordan was one of the strategies that<br/>10 women used to gain privacy, although this<br/>11 was not always achieved; women were<br/>12 surprised and distressed that in public<br/>13 hospitals, and at times in private hospitals<br/>14 in Jordan, they were expected to share a<br/>15 room with other women during labour and<br/>16 birth; privacy was afforded when birthing<br/>17 at home; women felt exposed, and<br/>18 embarrassed and complained of not being<br/>19 covered with a sheet; participants were<br/>20 distressed by, and critical of, the number<br/>21 of doctors that came in and out of their<br/>22 rooms, the most distressing part of having<br/>23 to deal with many different health<br/>24 professionals was during vaginal<br/>25 examinations, participants discussed their<br/>26 preference for having a female health<br/>27 professional care for them during labour,<br/>28 and birth, and in particular to perform<br/>29 vaginal examinations.<br/>30<br/>31<br/>32<br/>33<br/>34<br/>35</p> | <p>Data analysis revealed five major themes—"Birth Plan Compliance", "Obstetric Problems", "Mother-Infant Bond", "Emotional Wounds" and "Perinatal Experiences"—and 13 subthemes. The majority of responses mentioned feelings of being un/misinformed by healthcare personnel, being disrespected and objectified, lack of support, and various problems during childbirth and postpartum. Fear, loneliness, traumatic stress, and depression were recurrent themes in participants' responses. As the actions of healthcare personnel can substantially impact a birth experience, the study findings strongly suggest the need for proper policies, procedures, training, and support to minimise negative consequences of childbirth.</p> |
|------------------------------------------------------------------------------------------------------------------------------------------------------------------------------------------------------------------------------------------------------------------------------------------------------------------------------------------------------------------------------------------------------------------------------------------------------------------------------------------------------------------------------------------------------------------------------------------------------------------------------------------------------------------------------------------------------------------------------------------------------------------------------------------------------------------------------------------------------------------------------------------------------------------------------------------------------------------------------------------------------------------------------------------------------------------------------------------------------------------------------------------|-----------------------------------------------------------------------------------------------------------------------------------------------------------------------------------------------------------------------------------------------------------------------------------------------------------------------------------------------------------------------------------------------------------------------------------------------------------------------------------------------------------------------------------------------------------------------------------------------------------------------------------------------------------------------------------------------------------------------------------------------|

|                                                                                                                                                                                                                                                                                                                                                                             |                                                                                                         |
|-----------------------------------------------------------------------------------------------------------------------------------------------------------------------------------------------------------------------------------------------------------------------------------------------------------------------------------------------------------------------------|---------------------------------------------------------------------------------------------------------|
| <p>Study conducted in Irbid (Jordan) and Sydney (Australia) and at the same place, which can not be representative of other women in Jordan; small sample (only 27 Jordanian women); participants self-select, other women may have different stories to tell; participants may not have felt comfortable enough to discuss everything they have experienced or thought</p> | <p>Cannot pinpoint a specific geographic area for future policy recommendations; not generalisable;</p> |
| <p><b>Fleury S. et al (2013) (a)</b></p>                                                                                                                                                                                                                                                                                                                                    | <p><b>Robins C. S. et al (2005)</b></p>                                                                 |
| <p>2</p>                                                                                                                                                                                                                                                                                                                                                                    | <p>2</p>                                                                                                |
| <p>2</p>                                                                                                                                                                                                                                                                                                                                                                    | <p>2</p>                                                                                                |
| <p>2</p>                                                                                                                                                                                                                                                                                                                                                                    | <p>2</p>                                                                                                |
| <p>1</p>                                                                                                                                                                                                                                                                                                                                                                    | <p>1</p>                                                                                                |
| <p>1</p>                                                                                                                                                                                                                                                                                                                                                                    | <p>1</p>                                                                                                |
| <p>1</p>                                                                                                                                                                                                                                                                                                                                                                    | <p>1</p>                                                                                                |
| <p>2</p>                                                                                                                                                                                                                                                                                                                                                                    | <p>1</p>                                                                                                |
| <p>1</p>                                                                                                                                                                                                                                                                                                                                                                    | <p>2</p>                                                                                                |
| <p>1</p>                                                                                                                                                                                                                                                                                                                                                                    | <p>1</p>                                                                                                |
| <p>1</p>                                                                                                                                                                                                                                                                                                                                                                    | <p>1</p>                                                                                                |
| <p><b>14</b></p>                                                                                                                                                                                                                                                                                                                                                            | <p><b>14</b></p>                                                                                        |
| <p>Brazil (?)</p>                                                                                                                                                                                                                                                                                                                                                           | <p>USA (2002-2004)</p>                                                                                  |
| <p>285</p>                                                                                                                                                                                                                                                                                                                                                                  | <p>27</p>                                                                                               |

|                                                                                                                                                                                                    |                                                                                                                                                                                      |
|----------------------------------------------------------------------------------------------------------------------------------------------------------------------------------------------------|--------------------------------------------------------------------------------------------------------------------------------------------------------------------------------------|
| <p>190 users and/or their companions, 90 professionals directly involved in providing health care and 5 hospital administrators</p>                                                                | <p>27 psychiatric patients (11 female, 16 male)</p>                                                                                                                                  |
| <p>Denial, submission, naturalization, individual resistance, collective resistance</p>                                                                                                            | <p>Threat of physical violence and arbitrary nature of the rules; not knowing the consumers as individuals, perceived lack of fairness, experiencing disrespect or embarrassment</p> |
| <p>Not to naturalize the disrespectful and oppressive treatment; not to discriminate; to educate patients to identify discrimination and mistreatment; to resort the mechanism of denouncement</p> | <p>Efforts to reduce the incidence of traumatic and harmful events in psychiatric settings; revise hiring practices; improve staff training; changes to policies and procedures</p>  |

1  
2  
3  
4  
5  
6  
7  
8  
9  
10  
11  
12  
13  
14  
15  
16  
17  
18  
19  
20  
21  
22  
23  
24  
25  
26  
27  
28  
29  
30  
31  
32  
33  
34  
35  
36  
37  
38  
39  
40  
41  
42  
43  
44  
45  
46  
47  
48  
49  
50  
51  
52  
53  
54  
55  
56  
57  
58  
59  
60

|                                                                                                                                                                                                                                                                                                                                                                                                                                                                                                                                                                                                                                                                                                                                                                                                                                                                                                                                                                                                                                                                                                                                                                                                      |                                                                                                                                                                                                                                                                                                                                                                                                                                                                                                                                                                               |
|------------------------------------------------------------------------------------------------------------------------------------------------------------------------------------------------------------------------------------------------------------------------------------------------------------------------------------------------------------------------------------------------------------------------------------------------------------------------------------------------------------------------------------------------------------------------------------------------------------------------------------------------------------------------------------------------------------------------------------------------------------------------------------------------------------------------------------------------------------------------------------------------------------------------------------------------------------------------------------------------------------------------------------------------------------------------------------------------------------------------------------------------------------------------------------------------------|-------------------------------------------------------------------------------------------------------------------------------------------------------------------------------------------------------------------------------------------------------------------------------------------------------------------------------------------------------------------------------------------------------------------------------------------------------------------------------------------------------------------------------------------------------------------------------|
| <p>Professionals that have less contact with patients tend to be given an even more favorable position; it was not possible to prove the hypothesis that a higher position increases the chances of discriminatory behavior; concerning the institutional culture and management, there is a trivialization of the injustices and rationalization of the inadequate conditions and precariousness present in the public healthcare services; the lack of effective channels for filing grievances and punishing mistreatment and discrimination is made worse by a predominant attitude that perceives any complaint as disrespectful on the part of patients; the absence of clear rules, procedures and norms related to the referral of patients and the selection of those that will be assisted increases the discretionary power of professionals that are not trained for these tasks; the structural aspect of inequality showed the precariousness of the public healthcare services, thus generating a pilgrimage in users to different health units in search of care; the existence of stigmatizing characteristics increases the likelihood of the user being discriminated against</p> | <p>Eighteen of 27 interviewees described harmful incidents that they had witnessed or experienced directly, many of which evoked strong emotional responses by consumers during their narration. Nearly all incidents described were hospital based and were clustered around two sets of themes. The first set related to the hospital setting, including the fear of physical violence and the arbitrary nature of the rules. The second set related to the narrators' interactions with clinical staff, including depersonalization, lack of fairness, and disrespect.</p> |
| <p>Cannot be generalized, limited geographic area, did not cite data collection time frame</p>                                                                                                                                                                                                                                                                                                                                                                                                                                                                                                                                                                                                                                                                                                                                                                                                                                                                                                                                                                                                                                                                                                       | <p>Did not interview staff</p>                                                                                                                                                                                                                                                                                                                                                                                                                                                                                                                                                |

| Hrisos S (2013)                                                                                                                                             | Adolfsson A. et al (2012)                                                                                                                                                                                 |
|-------------------------------------------------------------------------------------------------------------------------------------------------------------|-----------------------------------------------------------------------------------------------------------------------------------------------------------------------------------------------------------|
| 2                                                                                                                                                           | 2                                                                                                                                                                                                         |
| 2                                                                                                                                                           | 2                                                                                                                                                                                                         |
| 1                                                                                                                                                           | 2                                                                                                                                                                                                         |
| 2                                                                                                                                                           | 2                                                                                                                                                                                                         |
| 2                                                                                                                                                           | 2                                                                                                                                                                                                         |
| 2                                                                                                                                                           | 1                                                                                                                                                                                                         |
| 2                                                                                                                                                           | 1                                                                                                                                                                                                         |
| 1                                                                                                                                                           | 1                                                                                                                                                                                                         |
| 2                                                                                                                                                           | 2                                                                                                                                                                                                         |
| 2                                                                                                                                                           | 2                                                                                                                                                                                                         |
| <b>18</b>                                                                                                                                                   | <b>17</b>                                                                                                                                                                                                 |
| England (2010)                                                                                                                                              | Sweden (2007)                                                                                                                                                                                             |
| 59                                                                                                                                                          | 14                                                                                                                                                                                                        |
| 16 patients (10 female, 6 male) and 4 relatives (2 female, 2 male), 39 healthcare staff (9 pharmacists, 11 doctors, 12 nurses and 7 health care assistants) | 14 inpatients, Two lowest priority groups in the Emergency Department who eventually wait for the longest period of time to receive treatment (at Skaraborg area, a district in the Västra Götaland area) |



1  
2  
3  
4  
5  
6  
7  
8  
9  
10  
11  
12  
13  
14  
15  
16  
17  
18  
19  
20  
21  
22  
23  
24  
25  
26  
27  
28  
29  
30  
31  
32  
33  
34  
35  
36  
37  
38  
39  
40  
41  
42  
43  
44  
45  
46  
47  
48  
49  
50  
51  
52  
53  
54  
55  
56  
57  
58  
59  
60

|                                                                                                                                                                                                                                                                                                                                                                                                                                                  |                                                                                                                                                                                                                                                                                                                                                                                                                                                                                                           |
|--------------------------------------------------------------------------------------------------------------------------------------------------------------------------------------------------------------------------------------------------------------------------------------------------------------------------------------------------------------------------------------------------------------------------------------------------|-----------------------------------------------------------------------------------------------------------------------------------------------------------------------------------------------------------------------------------------------------------------------------------------------------------------------------------------------------------------------------------------------------------------------------------------------------------------------------------------------------------|
| <p>Perceived advantages of patient involvement in improving their own safety; Concerns about involving patients in improving their own safety; Risk of damage to the patient-provider relationship; Staff may treat the patient “differently”; Behavioural implications of service-user fears; Behavioural implications of healthcare professional fears</p>                                                                                     | <p>To manage patients' feelings of being dependent on care, exposed, vulnerable, and secure; create conditions that enhance well being</p>                                                                                                                                                                                                                                                                                                                                                                |
| <p>To address patients concerns about their safety; to involve patients in the decision-making process; to improve staff communication skills; to train professionalism in patient-provider relationship; to engage patients proactively in aspects of their care and work issues that they perceive that might impact negatively their care; not to avoid patient-provider prolonged contact; to stimulate patients to share their concerns</p> | <p>To listen to patients' history and to ask question about it, to be available/attentive (diminishes helplessness and insecurity); to manage basic needs (food, water, pain relief) (diminishes feelings of not being treated respectfully and that their symptoms were not taken seriously); to give clear information about risk classification (diminishes patients' discomfort and mental suffering); to show understanding and compassion (makes patients feel secure), effective communication</p> |

|                                                                                                                                                                                                                                                                                                                                                                                                                                                                                                                                                                                                                                                                                                                                                                                                                                                                                                                                                                                                                                                                                                                                                                                                                                                                                                                                                                                                                                                                                                                                                                                                                                                                                                                                                                                                                                                                                                                                                                                                                                                                                                                                                                                                                                                                                                                                                      |                                                                                                                                                                                                                                                                                                                                                                                                                                                                                                                                                                                                                                                                                                                                                                                                                |
|------------------------------------------------------------------------------------------------------------------------------------------------------------------------------------------------------------------------------------------------------------------------------------------------------------------------------------------------------------------------------------------------------------------------------------------------------------------------------------------------------------------------------------------------------------------------------------------------------------------------------------------------------------------------------------------------------------------------------------------------------------------------------------------------------------------------------------------------------------------------------------------------------------------------------------------------------------------------------------------------------------------------------------------------------------------------------------------------------------------------------------------------------------------------------------------------------------------------------------------------------------------------------------------------------------------------------------------------------------------------------------------------------------------------------------------------------------------------------------------------------------------------------------------------------------------------------------------------------------------------------------------------------------------------------------------------------------------------------------------------------------------------------------------------------------------------------------------------------------------------------------------------------------------------------------------------------------------------------------------------------------------------------------------------------------------------------------------------------------------------------------------------------------------------------------------------------------------------------------------------------------------------------------------------------------------------------------------------------|----------------------------------------------------------------------------------------------------------------------------------------------------------------------------------------------------------------------------------------------------------------------------------------------------------------------------------------------------------------------------------------------------------------------------------------------------------------------------------------------------------------------------------------------------------------------------------------------------------------------------------------------------------------------------------------------------------------------------------------------------------------------------------------------------------------|
| <p>1<br/>2<br/>3<br/>4 Patients were generally positive towards the notion of patient<br/>5 involvement in improving their safety and identified potential<br/>6 advantages; to be able to ask questions or have their concerns<br/>7 addressed, since this provided them with reassurance and a better<br/>8 understanding of what was happening to them and what to expect;<br/>9 perceived advantages expressed by staff were improved adherence to<br/>10 treatment and greater patient satisfaction with care, achieved through<br/>11 better understanding; pushing improvement through patient-mediated<br/>12 intervention, pointing out potential errors or oversights in care provision<br/>13 was felt to be “questioning” or challenging the professionalism of<br/>14 healthcare staff; other actions perceived by patients and relatives as<br/>15 “challenging” or as “criticising” included overtly or explicitly checking<br/>16 that the correct medicines had been administered during drug rounds<br/>17 and asking about alternative treatment options to those recommended<br/>18 by their doctor; patients may experience a loss of trust in the<br/>19 competency or integrity of their care providers, if they feel that they<br/>20 “have to” ask or tell them about potential lapses in their care, because<br/>21 they are not doing the job properly; healthcare providers were expected<br/>22 to always remain “professional” in their dealings with patients and their<br/>23 families, regardless of the situation, and there appeared to be a general<br/>24 consensus amongst both patients and healthcare professionals that<br/>25 most would; being rebuffed or chastised was a very real fear for many<br/>26 patients, and a key barrier to them speaking up; the perceived<br/>27 consequences of upsetting staff, and disrupting relationships, were so<br/>28 powerful that they admitted not sharing potentially serious queries or<br/>29 concerns even with their relatives, who they knew would immediately<br/>30 raise them with staff; staff suggested that they and their colleagues<br/>31 could become guarded in their interactions with certain patients and<br/>32 their relatives, therefore distancing themselves from being the potential<br/>33 target of a complaint.<br/>34<br/>35</p> | <p>To allow patients to<br/>express their symptoms<br/>and feelings freely, they<br/>had a sense that they<br/>were being<br/>acknowledged and taken<br/>seriously; to know what<br/>the nurses were<br/>documenting in their<br/>files, when patients are<br/>assigned a low priority in<br/>the emergency<br/>department (ED); to give<br/>them adequate attention;<br/>to help patients not to<br/>feel helpless and<br/>overlooked; to give<br/>adequate attention; to<br/>explain levels of priority<br/>in the ED so that patients<br/>do not feel insecure; to<br/>be available, attentive,<br/>and responding<br/>appropriately to the<br/>patient’s needs; to<br/>provide adequate food,<br/>drink and pain relief; to<br/>show understanding and<br/>compassion for the<br/>patient’s situation.</p> |
|------------------------------------------------------------------------------------------------------------------------------------------------------------------------------------------------------------------------------------------------------------------------------------------------------------------------------------------------------------------------------------------------------------------------------------------------------------------------------------------------------------------------------------------------------------------------------------------------------------------------------------------------------------------------------------------------------------------------------------------------------------------------------------------------------------------------------------------------------------------------------------------------------------------------------------------------------------------------------------------------------------------------------------------------------------------------------------------------------------------------------------------------------------------------------------------------------------------------------------------------------------------------------------------------------------------------------------------------------------------------------------------------------------------------------------------------------------------------------------------------------------------------------------------------------------------------------------------------------------------------------------------------------------------------------------------------------------------------------------------------------------------------------------------------------------------------------------------------------------------------------------------------------------------------------------------------------------------------------------------------------------------------------------------------------------------------------------------------------------------------------------------------------------------------------------------------------------------------------------------------------------------------------------------------------------------------------------------------------|----------------------------------------------------------------------------------------------------------------------------------------------------------------------------------------------------------------------------------------------------------------------------------------------------------------------------------------------------------------------------------------------------------------------------------------------------------------------------------------------------------------------------------------------------------------------------------------------------------------------------------------------------------------------------------------------------------------------------------------------------------------------------------------------------------------|

1  
2  
3  
4  
5  
6  
7  
8  
9  
10  
11  
12  
13  
14  
15  
16  
17  
18  
19  
20  
21  
22  
23  
24  
25  
26  
27  
28  
29  
30  
31  
32  
33  
34  
35  
36  
37  
38  
39  
40  
41  
42  
43  
44  
45  
46  
47  
48  
49  
50  
51  
52  
53  
54  
55  
56  
57  
58  
59  
60

|                                                                                           |                                      |
|-------------------------------------------------------------------------------------------|--------------------------------------|
| <p>Not generalisable beyond the sample studied; small sample, limited geographic area</p> |                                      |
| <p><b>Merakou K. et al (2001)</b></p>                                                     | <p><b>Howard M. et al (2013)</b></p> |
| <p>2</p>                                                                                  | <p>2</p>                             |
| <p>2</p>                                                                                  | <p>1</p>                             |
| <p>2</p>                                                                                  | <p>1</p>                             |
| <p>2</p>                                                                                  | <p>2</p>                             |
| <p>1</p>                                                                                  | <p>1</p>                             |
| <p>1</p>                                                                                  | <p>1</p>                             |
| <p>0</p>                                                                                  | <p>2</p>                             |
| <p>1</p>                                                                                  | <p>1</p>                             |
| <p>2</p>                                                                                  | <p>1</p>                             |
| <p>1</p>                                                                                  | <p>1</p>                             |
| <p><b>14</b></p>                                                                          | <p><b>13</b></p>                     |
| <p>Greece (1996)</p>                                                                      | <p>Australia (1997-2007)</p>         |
| <p>600</p>                                                                                | <p>16</p>                            |

|                                                                                                                                                                                                                                                                                                                                                                                                              |                                                                                                                                                                                                                                                                                                                                                                                                                                                                                                                                                                                                               |
|--------------------------------------------------------------------------------------------------------------------------------------------------------------------------------------------------------------------------------------------------------------------------------------------------------------------------------------------------------------------------------------------------------------|---------------------------------------------------------------------------------------------------------------------------------------------------------------------------------------------------------------------------------------------------------------------------------------------------------------------------------------------------------------------------------------------------------------------------------------------------------------------------------------------------------------------------------------------------------------------------------------------------------------|
| <p>600 patients (49,8% men; 50.2% women)</p>                                                                                                                                                                                                                                                                                                                                                                 | <p>16 patients</p>                                                                                                                                                                                                                                                                                                                                                                                                                                                                                                                                                                                            |
| <p>Knowledge of the law on patient's rights; the right to information; the right to decision making; the right to confidentiality; the right to object, mechanism of protection of patients' rights</p>                                                                                                                                                                                                      | <p>Ineffective communication; Standard of care is not acceptable; Treated with disrespect; Ineffective complaints handling systems; Perceptions of negligence</p>                                                                                                                                                                                                                                                                                                                                                                                                                                             |
| <p>To inform patients during the course of their admission; to train healthcare professionals on patients' rights; to provide full information about diagnostic; to improve communication with patients and families; to take the time to attend; to obtain consent; to involve patients in decision-making process; to respect privacy and confidentiality; to establish a complaints management system</p> | <p>Complaint management needs to be redressed; the paradigm shift must go beyond regurgitating complaint data metrics in percentages per patient contact, toward a concerted effort to evaluate what the complaint data are really saying; the voices of the taciturn dissatisfied patients need to be encouraged so that their complaints are heard at the time they are experiencing dissatisfaction; to use this opportunity to identify a more positive and proactive approach in encouraging patients to complain when they are dissatisfied; to influence real-time improvements and patient safety</p> |

1  
2  
3  
4  
5  
6  
7  
8  
9  
10  
11  
12  
13  
14  
15  
16  
17  
18  
19  
20  
21  
22  
23  
24  
25  
26  
27  
28  
29  
30  
31  
32  
33  
34  
35  
36  
37  
38  
39  
40  
41  
42  
43  
44  
45  
46  
47  
48  
49  
50  
51  
52  
53  
54  
55  
56  
57  
58  
59  
60

|                                                                                                                                                                                                                                                                                                                                                                                                                                                                                                                                                                                                                                                                                                                                                                                                         |                                                                                                                                                                                                                                                                                                                                                                                                                                                                                                                                                                                                                     |
|---------------------------------------------------------------------------------------------------------------------------------------------------------------------------------------------------------------------------------------------------------------------------------------------------------------------------------------------------------------------------------------------------------------------------------------------------------------------------------------------------------------------------------------------------------------------------------------------------------------------------------------------------------------------------------------------------------------------------------------------------------------------------------------------------------|---------------------------------------------------------------------------------------------------------------------------------------------------------------------------------------------------------------------------------------------------------------------------------------------------------------------------------------------------------------------------------------------------------------------------------------------------------------------------------------------------------------------------------------------------------------------------------------------------------------------|
| <p>Patients most inclined to complain were male, young people, urban residents, people with a low income, and those experiencing a short hospital stay; 94.2% answered they do not claim for their rights, 71.6% replied they did not claim because they were satisfied with hospitalization, 9.7% were afraid of doctors reactions, 9.2% believed that the outcome would not be in their favor, 5.5% reported they were not aware of their rights; 44.4% answered that the patients' rights would be better respected if a committee or an expert were available at the hospital setting, and other mechanisms would be staff education in medical ethics (22.4%), giving patients information about their rights as soon as they were hospitalized 21.4%), introduction of new legislation (5.3%)</p> | <p>15 of the 16 participants did not voice their complaint at the time of the event, when they experienced dissatisfaction with service delivery; the most significant theme that emerged from the narratives was the issue of the participants feeling that they were not being listened to nor supported to voice their concerns or complaints; patients articulated the need for health-care system reform; they primarily wanted to be listened to, to be acknowledged, to be believed, for people to take ownership if they had made a mistake, for mistakes not to occur again, and to receive an apology</p> |
| <p>Small sample, limited geographic area</p>                                                                                                                                                                                                                                                                                                                                                                                                                                                                                                                                                                                                                                                                                                                                                            | <p>The sample size was limited in terms of location and the fact that there was no culturally and linguistically diverse (CALD) or indigenous representation; limited geographic area</p>                                                                                                                                                                                                                                                                                                                                                                                                                           |

| Faschingbauer KM et al (2013) (a) | Evan E. E. et al (2007) (a)     | Kanengoni B. et al (2019) (a) |
|-----------------------------------|---------------------------------|-------------------------------|
| 2                                 | 2                               | 2                             |
| 2                                 | 2                               | 2                             |
| 2                                 | 2                               | 1                             |
| 1                                 | 2                               | 2                             |
| 1                                 | 1                               | 1                             |
| 1                                 | 1                               | 1                             |
| 2                                 | 2                               | 2                             |
| 2                                 | 2                               | 2                             |
| 2                                 | 1                               | 2                             |
| 2                                 | 2                               | 2                             |
| 17                                | 17                              | 17                            |
| USA (?)                           | USA (?)                         | Zimbabwe (?)                  |
| 12                                | 40                              | 20                            |
| 06 men, 06 women                  | 20 pairs of parent and children | 20 pregnant and postpartum    |

|                                              |
|----------------------------------------------|
| Individual i                                 |
| 0 = not or inadequately addressed or applied |
| Tot:                                         |
| Qualitativ                                   |
| Cross-sectio                                 |
| Cohort                                       |
| Quan-quant                                   |
| convergent pi                                |
| method                                       |

|                                                                                                                                                                                                                                                                                                                                                                                                                                                                                                                                                                                                                                                                                                                                                                                                                                                                                                                                                                                                                                                                                                                                                                                             |                                                                                                                                                                                                       |                                                                                        |
|---------------------------------------------------------------------------------------------------------------------------------------------------------------------------------------------------------------------------------------------------------------------------------------------------------------------------------------------------------------------------------------------------------------------------------------------------------------------------------------------------------------------------------------------------------------------------------------------------------------------------------------------------------------------------------------------------------------------------------------------------------------------------------------------------------------------------------------------------------------------------------------------------------------------------------------------------------------------------------------------------------------------------------------------------------------------------------------------------------------------------------------------------------------------------------------------|-------------------------------------------------------------------------------------------------------------------------------------------------------------------------------------------------------|----------------------------------------------------------------------------------------|
| <p>1<br/>2<br/>3<br/>4<br/>5<br/>6<br/>7<br/>8<br/>9<br/>10<br/>11<br/>12<br/>13<br/>14<br/>15<br/>16<br/>17<br/>18<br/>19<br/>20<br/>21</p> <p>1) Patientt hope for respect and open communication; 2) Patient emotional response to the seclusion process; 3) Patient insight into behavior and the importance of positive coping skills</p>                                                                                                                                                                                                                                                                                                                                                                                                                                                                                                                                                                                                                                                                                                                                                                                                                                              | <p>Relationship building, demonstration of effort and competence, information exchange, availability, and appropriate level of child and parent involvement</p>                                       | <p>Abandonment of care and neglect; non-consented care, lack of information;</p>       |
| <p>22<br/>23<br/>24<br/>25<br/>26<br/>27<br/>28<br/>29<br/>30<br/>31<br/>32<br/>33<br/>34<br/>35<br/>36<br/>37<br/>38<br/>39<br/>40<br/>41<br/>42<br/>43<br/>44<br/>45<br/>46<br/>47<br/>48<br/>49<br/>50<br/>51<br/>52<br/>53<br/>54<br/>55<br/>56<br/>57<br/>58<br/>59<br/>60</p> <p>To discuss the patients' behavior, to give a chance to calm down before seclusion, to look for alternatives to seclusion, to ask patient to do something instead of telling him what to do, not to ignore the patient during seclusion, to explain the reason for seclusion, to treat patient as an individual, to improve staff communication skills, to know patients' prior history and behavior patterns; 2) To offer fluids and food during seclusion, to manage environment (temperature, cleanliness, noise), not to use seclusion as a punishment, no to mock/laugh at/talk about patients in a negative way, not to disrespect, mistreat or hurt patients, to be attentive to patients' needs; 3) to talk about the reasosn for seclusion, to give patient time to talk, to allow patients to obtain social support from peers, behavior management classes, to debrief after seclusion</p> | <p>To improve communication skills with children and their parents; to be attentive; to be available; to provide clear explanations; to consider the level of involvement of children and parents</p> | <p>To be attentive, to reduce wating times, to provide adequate health information</p> |

|                                                                                                                                                                                                                                                                                                                                                                                                                                                                                                                                                                                                                                                                                                                                                                                                                                                                                                                          |                                                                                                                                                                                                                                                                                                                                                                                                                                                                                                                               |                                                                                                                                                                                                                                                                                                                                                                                                                                                                                                                                                                                     |
|--------------------------------------------------------------------------------------------------------------------------------------------------------------------------------------------------------------------------------------------------------------------------------------------------------------------------------------------------------------------------------------------------------------------------------------------------------------------------------------------------------------------------------------------------------------------------------------------------------------------------------------------------------------------------------------------------------------------------------------------------------------------------------------------------------------------------------------------------------------------------------------------------------------------------|-------------------------------------------------------------------------------------------------------------------------------------------------------------------------------------------------------------------------------------------------------------------------------------------------------------------------------------------------------------------------------------------------------------------------------------------------------------------------------------------------------------------------------|-------------------------------------------------------------------------------------------------------------------------------------------------------------------------------------------------------------------------------------------------------------------------------------------------------------------------------------------------------------------------------------------------------------------------------------------------------------------------------------------------------------------------------------------------------------------------------------|
| <p>To provide open communication about patients' individual needs, talking about their feelings and individual problem before his or her behavior escalated and could not be controlled; to discuss their inappropriate behavior; to give a chance to calm down before seclusion; to ask patients to do something instead of telling them what to do; to offer as-needed medications earlier to control behaviors; to know specific medical and psychiatric background and history in order to understanding their personal needs and idiosyncrasies; to check on them while in the seclusion room, to pay attention to unmet patients' needs (to offer fluids, blankets, bathroom, cleanliness etc); not to mock them or laugh at; not to use seclusion as a form of punishment; to talk over the incident leading to seclusion after the episode; to give them time to talk; to provide family and social support.</p> | <p>To take the time to get to know the patients as individuals and develop a friendship with the patients; to be respectful; to inquire about personal or social concerns in addition to treating physical symptoms; to believe the children's words; to provide relational continuity; to help build trust; to demonstrate the best efforts and exhibit competence and knowledge about the child's care; to talk in an understandable, straightforward manner, give clear explanations, and provide complete information</p> | <p>Multifaceted and interconnected factors contribute to midwives' attitudes and behaviours towards their clients. Midwives' subjective perceptions, women's social status, and health system constraints (i.e., availability of trained midwives and quality of midwifery training) in rural and poorly resourced community, often result in inappropriate services, negative attitudes, abusive treatment, and disrespectful behaviour towards women. Poor treatment in maternity care directly contribute to adverse health outcomes and women's satisfaction with services.</p> |
|--------------------------------------------------------------------------------------------------------------------------------------------------------------------------------------------------------------------------------------------------------------------------------------------------------------------------------------------------------------------------------------------------------------------------------------------------------------------------------------------------------------------------------------------------------------------------------------------------------------------------------------------------------------------------------------------------------------------------------------------------------------------------------------------------------------------------------------------------------------------------------------------------------------------------|-------------------------------------------------------------------------------------------------------------------------------------------------------------------------------------------------------------------------------------------------------------------------------------------------------------------------------------------------------------------------------------------------------------------------------------------------------------------------------------------------------------------------------|-------------------------------------------------------------------------------------------------------------------------------------------------------------------------------------------------------------------------------------------------------------------------------------------------------------------------------------------------------------------------------------------------------------------------------------------------------------------------------------------------------------------------------------------------------------------------------------|



|                                                                                                                                                                                                               |                                                                                                                                                                                                                                                                                                                                                                                                                                                                                                                                                                                                                                                                                                                                                                               |                                                                                                                                                                                                                   |
|---------------------------------------------------------------------------------------------------------------------------------------------------------------------------------------------------------------|-------------------------------------------------------------------------------------------------------------------------------------------------------------------------------------------------------------------------------------------------------------------------------------------------------------------------------------------------------------------------------------------------------------------------------------------------------------------------------------------------------------------------------------------------------------------------------------------------------------------------------------------------------------------------------------------------------------------------------------------------------------------------------|-------------------------------------------------------------------------------------------------------------------------------------------------------------------------------------------------------------------|
| <p>Limited to one hospital, can not be transferred to other hospitals, unit cultures and different psychiatric units, difficulty of inpatient psychiatric patients to express their feelings and thoughts</p> | <p>Exclusion of non-English speakers, because families that have a language barrier may have different needs when it comes to communicating with their physician; modest sample size, limiting generalizability; limited geographical, ethnic, and religious variation in the patient population; self-selection bias may also have been a factor because those subjects who chose to participate may be more open to communicating with unfamiliar people than those who refused to be contacted; recruitment of patients through health care providers who may have differing opinions on whether a patient fits the prognosis criteria, especially given the difficulty in predicting length of life for many of the childhood diseases that result in premature death</p> | <p>Limitations noted include complexities in accessing participants, lack of privacy, silencing or limiting some participants replies and lack of re-peat interviews due to hard to reach sample populations.</p> |
| <p><b>Wofford M et al (2004)</b></p>                                                                                                                                                                          | <p><b>Beach M. C. et al (2017) (a)</b></p>                                                                                                                                                                                                                                                                                                                                                                                                                                                                                                                                                                                                                                                                                                                                    |                                                                                                                                                                                                                   |
| <p>2</p>                                                                                                                                                                                                      | <p>1</p>                                                                                                                                                                                                                                                                                                                                                                                                                                                                                                                                                                                                                                                                                                                                                                      |                                                                                                                                                                                                                   |
| <p>1</p>                                                                                                                                                                                                      | <p>1</p>                                                                                                                                                                                                                                                                                                                                                                                                                                                                                                                                                                                                                                                                                                                                                                      |                                                                                                                                                                                                                   |
| <p>1</p>                                                                                                                                                                                                      | <p>1</p>                                                                                                                                                                                                                                                                                                                                                                                                                                                                                                                                                                                                                                                                                                                                                                      |                                                                                                                                                                                                                   |
| <p>1</p>                                                                                                                                                                                                      | <p>1</p>                                                                                                                                                                                                                                                                                                                                                                                                                                                                                                                                                                                                                                                                                                                                                                      |                                                                                                                                                                                                                   |
| <p>2</p>                                                                                                                                                                                                      | <p>1</p>                                                                                                                                                                                                                                                                                                                                                                                                                                                                                                                                                                                                                                                                                                                                                                      |                                                                                                                                                                                                                   |
| <p>0</p>                                                                                                                                                                                                      | <p>0</p>                                                                                                                                                                                                                                                                                                                                                                                                                                                                                                                                                                                                                                                                                                                                                                      |                                                                                                                                                                                                                   |
| <p>1</p>                                                                                                                                                                                                      | <p>1</p>                                                                                                                                                                                                                                                                                                                                                                                                                                                                                                                                                                                                                                                                                                                                                                      |                                                                                                                                                                                                                   |
| <p>1</p>                                                                                                                                                                                                      | <p>1</p>                                                                                                                                                                                                                                                                                                                                                                                                                                                                                                                                                                                                                                                                                                                                                                      |                                                                                                                                                                                                                   |
| <p>0</p>                                                                                                                                                                                                      | <p>1</p>                                                                                                                                                                                                                                                                                                                                                                                                                                                                                                                                                                                                                                                                                                                                                                      |                                                                                                                                                                                                                   |
| <p>1</p>                                                                                                                                                                                                      | <p>1</p>                                                                                                                                                                                                                                                                                                                                                                                                                                                                                                                                                                                                                                                                                                                                                                      |                                                                                                                                                                                                                   |
| <p>10</p>                                                                                                                                                                                                     | <p>9</p>                                                                                                                                                                                                                                                                                                                                                                                                                                                                                                                                                                                                                                                                                                                                                                      |                                                                                                                                                                                                                   |
| <p>USA (1999-2000)</p>                                                                                                                                                                                        | <p>USA (?)</p>                                                                                                                                                                                                                                                                                                                                                                                                                                                                                                                                                                                                                                                                                                                                                                |                                                                                                                                                                                                                   |
| <p>222</p>                                                                                                                                                                                                    | <p>156-260</p>                                                                                                                                                                                                                                                                                                                                                                                                                                                                                                                                                                                                                                                                                                                                                                |                                                                                                                                                                                                                   |

|                                                                                                                                                                                                   |                                                                                                                                                                                                                                                                                                                                                     |
|---------------------------------------------------------------------------------------------------------------------------------------------------------------------------------------------------|-----------------------------------------------------------------------------------------------------------------------------------------------------------------------------------------------------------------------------------------------------------------------------------------------------------------------------------------------------|
| <p>222 complaints (from patients [111], patient's wife [27], husband [6], child [52], parents [50], other relative of friends [15] or a health care professional)</p>                             | <p>26 focus groups of men and women, 6-10 patients each group (African americans, latinoes, whites)</p>                                                                                                                                                                                                                                             |
| <p>Perceived unavailability, Disrespect, Inadequate information, Disagreement about expectations of care, Distrust, Interdisciplinary miscommunication, Misinformation</p>                        | <p>1) Definitions of respect; 2) Specific behaviors that convey respect or dignity</p>                                                                                                                                                                                                                                                              |
| <p>To use patients complaints to improve physicians' communication skills, to avoid disrespectful behavior, to make communication a high priority, to improve interdisciplinary communication</p> | <p>To treat like a person, to treat like an equal, to hear what patient has to say, to respect the patient's knowledge of him/herself, to ask questions about the condition (demonstration of concern), to give honest explanations of medical issues, to avoid stereotyping, to allow patient input into treatment choices, to handle lateness</p> |

|                                                                                                                                                                                                                                                                                                                                                                                                                                                                                                                                                                                                               |                                                                                                                                                                                                                                                                                                                                                                                                                                                                                                                                                                                                                                                                                                                                                                                                                                                                                                                                                            |
|---------------------------------------------------------------------------------------------------------------------------------------------------------------------------------------------------------------------------------------------------------------------------------------------------------------------------------------------------------------------------------------------------------------------------------------------------------------------------------------------------------------------------------------------------------------------------------------------------------------|------------------------------------------------------------------------------------------------------------------------------------------------------------------------------------------------------------------------------------------------------------------------------------------------------------------------------------------------------------------------------------------------------------------------------------------------------------------------------------------------------------------------------------------------------------------------------------------------------------------------------------------------------------------------------------------------------------------------------------------------------------------------------------------------------------------------------------------------------------------------------------------------------------------------------------------------------------|
| <p>Complaints were most commonly lodged by a patient (111), followed by a patient's spouse (33), child (52), parent (50), relative/friend (15), or health care professional (2). The most commonly identified category was disrespect (36%), followed by disagreement about expectations of care (23%), inadequate information (20%), distrust (18%), perceived unavailability (15%), interdisciplinary miscommunication (4%), and misinformation (4%). Multiple categories were identified in 42 (19%) complaints. Examples from each category provide adequate detail to develop instructional modules.</p> | <p>Autonomy: clearly expressed by participants in the themes of wanting honest and clear explanations, and in wanting input into treatment plans. Dignity: treating people equally; asking questions about medical conditions, might be interpreted as a sense of caring or investment in the value of the patient as person through concern about medical issues. Integrity: to listen to the patient's narrative, knowing the patient as a unique person, and the avoidance of stereotyping. Trusting patients' self-knowledge: is of particular interest because of its prominence among African American participants, and because it perhaps pushes the conceptualization of respect into new territory. Vulnerability: respect for vulnerability was not explicitly mentioned by any participants. Yet vulnerability emerges as present when viewing the corpus of participant comments as a whole in particular, vulnerability to mistreatment.</p> |
| <p>Not generalizable, because many patients leave silently and do not register complaints</p>                                                                                                                                                                                                                                                                                                                                                                                                                                                                                                                 | <p>Imprecise number of participants, time frame of data collection is missing</p>                                                                                                                                                                                                                                                                                                                                                                                                                                                                                                                                                                                                                                                                                                                                                                                                                                                                          |

1  
2  
3  
4  
5  
6  
7  
8  
9  
10  
11  
12  
13  
14  
15  
16  
17  
18  
19  
20  
21  
22  
23  
24  
25  
26  
27  
28  
29  
30  
31  
32  
33  
34  
35  
36  
37  
38  
39  
40  
41  
42  
43  
44  
45  
46  
47  
48  
49  
50  
51  
52  
53  
54  
55  
56  
57  
58  
59  
60

| CRITICAL APPRAISAL SCORES                                           |                               |                                                                                   |                     |
|---------------------------------------------------------------------|-------------------------------|-----------------------------------------------------------------------------------|---------------------|
| <b>Item score (color and value)</b>                                 |                               | (a) Did not cite explicitly the data collection date/time frame (e.g. month/year) |                     |
| 1 = adequately addressed or applied                                 | 2 = well addressed or applied |                                                                                   |                     |
| <b>Qualitative Score Appraisal by study design, color and value</b> |                               |                                                                                   |                     |
|                                                                     | <b>Low quality</b>            | <b>Moderate quality</b>                                                           | <b>High quality</b> |
| <b>Randomised controlled trials</b>                                 | 0-7                           | 8-14                                                                              | 15-20               |
| <b>Non-randomised controlled studies</b>                            | 0-9                           | 10-17                                                                             | 18-24               |
| <b>Cohort study</b>                                                 | 0-9                           | 10-17                                                                             | 18-24               |
| <b>Case-control and cross-sectional studies</b>                     | 0-4                           | 5-9                                                                               | 10-14               |

|  |                                                       | <b>Gebremichael MW et al (2018)</b> |
|--|-------------------------------------------------------|-------------------------------------|
|  | <b>Design</b>                                         | 2                                   |
|  | <b>Question</b>                                       | 2                                   |
|  | <b>Setting/location</b>                               | 2                                   |
|  | <b>Selection</b>                                      | 2                                   |
|  | <b>Characteristics</b>                                | 2                                   |
|  | <b>Exposure &amp; outcomes</b>                        | 2                                   |
|  | <b>Study size</b>                                     | 2                                   |
|  | <b>Statistics</b>                                     | 2                                   |
|  | <b>Eligibility</b>                                    | 2                                   |
|  | <b>Results</b>                                        | 2                                   |
|  | <b>Conflict of interest</b>                           | 2                                   |
|  | <b>Limitations</b>                                    | 2                                   |
|  | <b>Total</b>                                          | <b>24</b>                           |
|  | <b>Country (year of research and data collection)</b> | Ethiopia (2015)                     |
|  | <b>Sample size</b>                                    | 1,125                               |
|  | <b>Type of samples</b>                                | 1,125 women post-delivery           |

1  
2  
3  
4  
5  
6  
7  
8  
9  
10  
11  
12  
13  
14  
15  
16  
17  
18  
19  
20  
21  
22  
23  
24  
25  
26  
27  
28  
29  
30  
31  
32  
33  
34  
35  
36  
37  
38  
39  
40  
41  
42  
43  
44  
45  
46  
47  
48  
49  
50  
51  
52  
53  
54  
55  
56  
57  
58  
59  
60

**or Review Evidence (SURE) - Questions to assist with the critical appraisal of cross-sectional studies**

**STRATEGIES/BEHAVIORS/OUTCOMES OF INTEREST**

To increase respect and reduce abuse

**INTERVENTIONS TO ACHIEVE IMPROVEMENTS**

To avoid shouting, scolding, ignoring, to offer adequate information, to obtain consent, to avoid breaching in confidentiality and privacy, to avoid leaving women unattended, to allow women to participate in decision-making

|                    |                                                       |                                                                                                                                                                                                                                                                                                                                                                                                                                                                                                                                                                                                                                                                                                                                                                                                                                                                                                                               |
|--------------------|-------------------------------------------------------|-------------------------------------------------------------------------------------------------------------------------------------------------------------------------------------------------------------------------------------------------------------------------------------------------------------------------------------------------------------------------------------------------------------------------------------------------------------------------------------------------------------------------------------------------------------------------------------------------------------------------------------------------------------------------------------------------------------------------------------------------------------------------------------------------------------------------------------------------------------------------------------------------------------------------------|
| Specialist Unit fo | <p style="text-align: center;"><b>RESULTS</b></p>     | <p><b>More D and A:</b> Disrespect and abuse (D and A) during delivery services was reported more among: women residing in urban compared with rural areas and women educated to grade 9 or above; women in the age groups 20–34, and 35 or above, compared to those below the age of 20 years, women who were heads of households reported more incidents of D and A compared with women living in a household headed by a male; women who spent longer hours in labour in health facilities, compared with women who spent less than 1 hour in labour; women who were not permitted to have support persons/relatives in the delivery room also reported a significantly higher rate of D and A during labour and delivery compared with those women who were allowed to have support persons. <b>Less D and A:</b> Women who had 3–5 births experienced fewer incidents of D and A than women with more than 5 births.</p> |
|                    | <p style="text-align: center;"><b>LIMITATIONS</b></p> | <p>Recall period of one year after delivery can be too long to remember details; there may be sampling bias due to focus on a single encounter in the previous year; excluded stillbirths, neonatal and infant deaths; underreporting by rural women due to their lack of awareness of their rights; did not include economic status in the analysis; information about facilities were not included</p>                                                                                                                                                                                                                                                                                                                                                                                                                                                                                                                      |

|                     |                                                       |                                                                                                                                         |
|---------------------|-------------------------------------------------------|-----------------------------------------------------------------------------------------------------------------------------------------|
| <b>onal studies</b> |                                                       | <b>Montesinos-Segura R et al (2017)</b>                                                                                                 |
|                     | <b>Design</b>                                         | 2                                                                                                                                       |
|                     | <b>Question</b>                                       | 2                                                                                                                                       |
|                     | <b>Setting/location</b>                               | 2                                                                                                                                       |
|                     | <b>Selection</b>                                      | 2                                                                                                                                       |
|                     | <b>Characteristics</b>                                | 2                                                                                                                                       |
|                     | <b>Exposure &amp; outcomes</b>                        | 2                                                                                                                                       |
|                     | <b>Study size</b>                                     | 2                                                                                                                                       |
|                     | <b>Statistics</b>                                     | 2                                                                                                                                       |
|                     | <b>Eligibility</b>                                    | 1                                                                                                                                       |
|                     | <b>Results</b>                                        | 1                                                                                                                                       |
|                     | <b>Conflict of interest</b>                           | 2                                                                                                                                       |
|                     | <b>Limitations</b>                                    | 2                                                                                                                                       |
|                     | <b>Total</b>                                          | <b>22</b>                                                                                                                               |
|                     | <b>Country (year of research and data collection)</b> | Peru (2016)                                                                                                                             |
|                     | <b>Sample size</b>                                    | 1.528                                                                                                                                   |
|                     | <b>Type of samples</b>                                | 1,528 women who delivered in 14 regional hospitals located in nine urban Peruvian cities                                                |
|                     | <b>STRATEGIES/BEHAVIOR S/OUTCOMES OF INTEREST</b>     | Interventions to reduce the prevalence of disrespect and abuse should be promptly implemented, with different approaches in each region |



1  
2  
3  
4  
5  
6  
7  
8  
9  
10  
11  
12  
13  
14  
15  
16  
17  
18  
19  
20  
21  
22  
23  
24  
25  
26  
27  
28  
29  
30  
31  
32  
33  
34  
35  
36  
37  
38  
39  
40  
41  
42  
43  
44  
45  
46  
47  
48  
49  
50  
51  
52  
53  
54  
55  
56  
57  
58  
59  
60

**e (SURE) - Questions to assist with the critical appraisal of cross-section**

**INTERVENTIONS TO ACHIEVE IMPROVEMENTS**

Face-to-face and virtual training might be used to enhance the capability of healthcare workers, and the importance of education to empower women should be emphasized; human resource centers for women to make complaints of disrespect and abuse safely and comfortably might be implemented; to measure the prevalence of disrespect and abuse at various time intervals; approaches specific to each setting are required; these problems should not be uniformly addressed throughout the country, and that each hospital and geographic region should prioritize interventions according to their particular context; to promote participation of a companion chosen by the pregnant woman throughout their labor

|                                     |             |                                                                                                                                                                                                                                                                                                                                                                                                                                                                                                                                                                                                                                                                                                                                                                                                                                                                                                                                       |
|-------------------------------------|-------------|---------------------------------------------------------------------------------------------------------------------------------------------------------------------------------------------------------------------------------------------------------------------------------------------------------------------------------------------------------------------------------------------------------------------------------------------------------------------------------------------------------------------------------------------------------------------------------------------------------------------------------------------------------------------------------------------------------------------------------------------------------------------------------------------------------------------------------------------------------------------------------------------------------------------------------------|
| Specialist Unit for Review Evidence | RESULTS     | <p>1488 women experienced abuse; the most prevalent form of disrespect and abuse was non-dignified care, followed by non-consented care, and non-confidential care; the number of women who experienced two or more categories of disrespect and abuse concurrently was 1358, whereas that of women who experienced four or more categories concurrently was 850; women who delivered by cesarean had a higher prevalence of abandonment of care and a lower prevalence of physical abuse as compared with women who delivered vaginally; women referred from other health facilities had a lower prevalence of abandonment of care, non-consented care, discrimination, and non-confidential care as compared with women who were not referred; abandonment of care was significantly more common in the coastal region than in the jungle, whereas discrimination was significantly more common in the jungle than at the coast</p> |
|                                     | LIMITATIONS | <p>The aim was to generate a validated survey of disrespect and abuse suitable for all Peruvian hospitals; however, each geographic region has its own unique cultural features and traditions; it is possible that some of the items listed in the survey were not part of the disrespect and abuse construct in some contexts; the length of the survey was a limiting factor; the participants might have felt intimidated by the hospital environment, which in turn might have influenced their responses; only women who had delivered in the past 48 hours were surveyed; this population of women could have been affected by immediate distressing factors related to labor, which might have influenced their answers</p>                                                                                                                                                                                                   |

|    |                                                              |
|----|--------------------------------------------------------------|
| 1  |                                                              |
| 2  | <b>Vedam S et al (2019)</b>                                  |
| 3  | 2                                                            |
| 4  | 2                                                            |
| 5  | 2                                                            |
| 6  |                                                              |
| 7  |                                                              |
| 8  | 2                                                            |
| 9  |                                                              |
| 10 |                                                              |
| 11 | 2                                                            |
| 12 | 2                                                            |
| 13 |                                                              |
| 14 |                                                              |
| 15 | 2                                                            |
| 16 |                                                              |
| 17 | 2                                                            |
| 18 | 2                                                            |
| 19 | 2                                                            |
| 20 | 2                                                            |
| 21 | 2                                                            |
| 22 |                                                              |
| 23 | 2                                                            |
| 24 |                                                              |
| 25 | 2                                                            |
| 26 |                                                              |
| 27 | <b>24</b>                                                    |
| 28 |                                                              |
| 29 |                                                              |
| 30 | USA (2010-2016)                                              |
| 31 |                                                              |
| 32 |                                                              |
| 33 |                                                              |
| 34 | 2.138                                                        |
| 35 |                                                              |
| 36 |                                                              |
| 37 |                                                              |
| 38 | 2138 women who experienced at least one pregnancy in the US, |
| 39 | including those currently pregnant                           |
| 40 |                                                              |
| 41 |                                                              |
| 42 |                                                              |
| 43 |                                                              |
| 44 |                                                              |
| 45 |                                                              |
| 46 |                                                              |
| 47 |                                                              |
| 48 |                                                              |
| 49 |                                                              |
| 50 |                                                              |
| 51 |                                                              |
| 52 |                                                              |
| 53 |                                                              |
| 54 |                                                              |
| 55 |                                                              |
| 56 |                                                              |
| 57 |                                                              |
| 58 |                                                              |
| 59 |                                                              |
| 60 |                                                              |

1  
2  
3  
4  
5  
6  
7  
8  
9  
10  
11  
12  
13 Physical abuse, sexual abuse, verbal abuse, stigma and  
14 discrimination, failure to meet professional standards of care, poor  
15 rapport between women and providers, health system conditions and  
16 constraints  
17  
18  
19  
20  
21  
22  
23  
24  
25  
26  
27

28  
29  
30  
31 Development of several new patient-designed indicators of  
32 mistreatment in maternity care; to prevent mistreatment, health care  
33 providers need to first consider how they can meet women's socio-  
34 cultural, emotional and psychological needs; building collaborations  
35 to address factors that maintain racial and ethnic disparities; creating  
36 a culture of equity and individualized care and routine training around  
37 issues of structural racism and intersectionality of multiple drivers of  
38 disadvantage; moving to the development of multidisciplinary teams;  
39 addressing issues of access to high quality care across communities  
40 and settings for care; equitable application of evidence-based  
41 interventions that are responsive to patient reported outcomes and  
42 priorities; training for care providers in promoting respectful care  
43 including values clarification and attitude transformation (VCAT),  
44 training on VCAT based on providers' and clients' rights and  
45 obligations, and revision of professional ethics and practices;  
46 strengthening facility quality improvement systems for monitoring,  
47 reporting, addressing, and resolving disrespect and abuse cases;  
48 Mentorship and on-the-job role-modeling by identified champions  
49 within the facility as part of routine continuous professional education;  
50 civic education about patient rights and avenues for redress may be  
51 needed to ensure accountability even in high resource countries  
52  
53  
54  
55  
56  
57  
58  
59  
60

1  
2  
3  
4  
5 1 in 6 women experienced more than one type of mistreatment (being  
6 shouted at; ignored by healthcare providers/refusing request for  
7 help/failing to respond request; violation of physical privacy;  
8 healthcare providers threatening to withhold treatment or forcing them  
9 to accept treatment they did not want; physical abuse [aggressive  
10 physical contact, inappropriate sexual conduct, refusal to provide  
11 anesthesia for an episiotomy, etc.]; any mistreatment [one or more  
12 above]. Indigenous, Hispanic, Black, White, White women with White  
13 partners, White women with Black partner experienced one type of  
14 mistreatment; Bi-racial couples experienced less mistreatment when  
15 women were White; White women with Black partners were twice  
16 likely to report mistreatment than White women with White partners;  
17 women who were born in the US reported similar rates of  
18 mistreatment compared to women who were not born in the US;  
19 recent immigrants were more likely to report mistreatment; younger  
20 women were more likely to report physical abuse; first-time mothers  
21 were twice as likely to report mistreatment; women who reported low  
22 socioeconomic status (SES) were twice as likely to report  
23 mistreatment compared to women with moderate or high SES; 1 in 3  
24 women with pregnancy complications or with social risk (substance  
25 use, incarceration, domestic violence) reported mistreatment (shouted  
26 at, scolded, violation of physical privacy); mistreatment was higher in  
27 hospital than in other settings  
28  
29  
30  
31  
32  
33  
34  
35

36  
37  
38 The sample is voluntary and not population-based; oversampling of  
39 communities that are often underrepresented in national studies on  
40 experience of care; women were more educated, older, and more  
41 likely to have been born in the US; samples of women from Hispanic,  
42 Asian, and other communities of color were lower than the national  
43 reported rates; lower representation from women who had more  
44 routine or simply "satisfactory" experiences that might not be  
45 characterized as either particularly empowering nor traumatizing;  
46 sample might have a 'higher' socioeconomic status population than is  
47 representative of the US childbearing population which would  
48 decrease rates of reported mistreatment, and potentially  
49 underestimate mistreatment in the US population at large; the study's  
50 national sample is not representative of the lived experience of many  
51 subgroups including undocumented immigrants, incarcerated  
52 pregnant parents, and families located in rural settings with limited  
53 options for maternity care; each person will have their own sense of  
54 bodily/self autonomy and human rights, placed within the cultural  
55 context of each environment  
56  
57  
58  
59  
60

|    |                                                                        |
|----|------------------------------------------------------------------------|
| 1  |                                                                        |
| 2  |                                                                        |
| 3  | <b>Lurie N et al (2004)</b>                                            |
| 4  | 2                                                                      |
| 5  | 2                                                                      |
| 6  |                                                                        |
| 7  | 2                                                                      |
| 8  |                                                                        |
| 9  | 2                                                                      |
| 10 |                                                                        |
| 11 | 2                                                                      |
| 12 |                                                                        |
| 13 | 2                                                                      |
| 14 |                                                                        |
| 15 | 2                                                                      |
| 16 | 1                                                                      |
| 17 | 2                                                                      |
| 18 |                                                                        |
| 19 | 1                                                                      |
| 20 |                                                                        |
| 21 | 2                                                                      |
| 22 |                                                                        |
| 23 | 2                                                                      |
| 24 |                                                                        |
| 25 | <b>22</b>                                                              |
| 26 |                                                                        |
| 27 |                                                                        |
| 28 | USA (2001)                                                             |
| 29 |                                                                        |
| 30 |                                                                        |
| 31 |                                                                        |
| 32 | 6.722                                                                  |
| 33 |                                                                        |
| 34 | 6,722 adults, age >18yr, living in the US, who speak English, Spanish, |
| 35 | Mandarin, Cantonese, Vietnamese, or Korean                             |
| 36 |                                                                        |
| 37 |                                                                        |
| 38 |                                                                        |
| 39 |                                                                        |
| 40 |                                                                        |
| 41 |                                                                        |
| 42 |                                                                        |
| 43 | Random phone interview                                                 |
| 44 |                                                                        |
| 45 |                                                                        |
| 46 |                                                                        |
| 47 |                                                                        |
| 48 |                                                                        |
| 49 |                                                                        |
| 50 |                                                                        |
| 51 |                                                                        |
| 52 |                                                                        |
| 53 |                                                                        |
| 54 |                                                                        |
| 55 |                                                                        |
| 56 |                                                                        |
| 57 |                                                                        |
| 58 |                                                                        |
| 59 |                                                                        |
| 60 |                                                                        |

1  
2  
3  
4  
5  
6  
7  
8  
9  
10  
11  
12  
13  
14  
15  
16  
17 To avoid negative perceptions of minority groups (low-income, low  
18 educational level, different races); to focus on approaches that can  
19 best improve the perceptions of respect  
20  
21  
22  
23  
24  
25  
26  
27  
28  
29  
30  
31  
32  
33  
34  
35  
36  
37  
38  
39  
40  
41  
42  
43  
44  
45  
46  
47  
48  
49  
50  
51  
52  
53  
54  
55  
56  
57  
58  
59  
60

1  
2  
3  
4  
5  
6  
7  
8 Over 14% of blacks, 19% of Hispanics, and 20% of Asians reported  
9 they have been treated with disrespect by their doctor. Men (15.9%)  
10 were more likely than women (11.6%) to perceive being treated with  
11 disrespect by their doctor. Asian (24%) and Hispanic (23%) men were  
12 more likely than black (17%) and white (11%) men to perceive being  
13 treated with disrespect. 18% of persons without a college education  
14 believed they have been treated with disrespect versus only 10% of  
15 those with college education. 29% of Asians, 22% of Hispanics, and  
16 19% of blacks without a college education reported being treated with  
17 disrespect or being looked down upon, versus 13% of whites; 32.3%  
18 of those who felt being treated with disrespect or being looked down  
19 upon did not follow doctors advice, and 31.1% put off needed care.  
20 Among those who felt treated unfairly because of race, 46.5% did not  
21 follow doctors advice, and 40.8% put off needed care. Among those  
22 who felt treated unfairly because of their language, 37.5% put off  
23 needed care. Among those who felt they would have been treated  
24 better had they been of a different race, 33.8% did not follow doctors'  
25 advice or put off care.  
26  
27  
28  
29  
30  
31  
32  
33  
34

35  
36  
37  
38  
39  
40  
41  
42  
43  
44  
45 Relying on self-report, may not be accurate; could not disentangle  
46 how general life experiences influence perceptions; could not  
47 examine other minorities; had insufficient number of native americans  
48 to analyse separately; lack of agreement on the definition of age-  
49 appropriate cancer screening  
50  
51  
52  
53  
54  
55  
56  
57  
58  
59  
60





1  
2  
3  
4  
5  
6  
7  
8  
9  
10  
11  
12  
13  
14  
15  
16  
17  
18  
19  
20  
21  
22  
23  
24  
25  
26  
27  
28  
29  
30  
31  
32  
33  
34  
35  
36  
37  
38  
39  
40  
41  
42  
43  
44  
45  
46  
47  
48  
49  
50  
51  
52  
53  
54  
55  
56  
57  
58  
59  
60

Friendliness, comfort, and attention; information and consent; non-abuse and kindness

Not to treat patients of different ages differently, not to discriminate, to avoid ageism; to respect confidentiality; to manage complications in labor and delivery; to allow companionship; to give information clearly; to give friendly, comforting and attentive care; to be patient; to provide mentoring for providers; strategies to reduce workplace stress, training on respectful maternity care,

1  
2  
3  
4  
5  
6  
7 **Receipt of respectful maternity care dimension 1 (RMC-D1) (friendliness, comfort, and**  
8 **attention):** clients aged 30-39 and 40-49 years had significantly higher RMC-D1 scores than  
9 clients aged 15-19 years. Clients who experienced delivery complications had significantly lower  
10 RMC-D1 scores compared to those who did not report complications. Clients of providers who  
11 perceived they were paid fairly for their job duties had significantly higher RMC-D1 scores  
12 compared with clients of providers who felt they were not paid fairly. Clients of nurses/midwives  
13 had significantly lower RMC-D1 scores compared to clients of clinicians. Clients of providers who  
14 reported attending 11-20 deliveries in the last month had significantly lower RMC-D1 scores  
15 compared to clients of providers who attended 1-10 deliveries. **Receipt of respectful maternity**  
16 **care dimension 2 (RMC-D2) (information and consent):** clients who had a birth companion  
17 had significantly higher scores compared to clients who did not have a companion in labor.  
18 Clients who reported attending to religious services at least weekly had significantly lower RMC-  
19 D2 scores compared to those who reported less than weekly attendance. Clients of providers  
20 who perceived they were paid fairly for their job duties had significantly higher RMC-D2 scores  
21 compared to clients of providers who perceived they are not paid fairly. Clients of providers who  
22 reported working more hours per week had significantly higher scores compared to clients of  
23 providers who work fewer hours. Clients of providers aged 30-39 and 40-49 years had  
24 significantly lower RMC-D2 scores compared to clients of providers aged 20-29 years. **Receipt**  
25 **of respectful maternal care dimension 3 (RMC-D3) (non-abuse and kindness):** clients of  
26 providers who were aged 50 years or more had significantly higher RMC-D3 scores compared to  
27 clients of providers in the 20-29 year age group. Clients of providers who reported access to two  
28 types of electronic mentoring had significantly higher RMC-D3 scores compared to clients of  
29 providers with no access to mentoring opportunities.  
30  
31  
32  
33  
34  
35

36  
37  
38  
39  
40  
41  
42  
43  
44  
45  
46  
47  
48 No differentiation in degree of disrespect; no random sampling, cannot make causal inferences  
49 and generalize findings; limited ability to identify all risk factors  
50  
51  
52  
53  
54  
55  
56  
57  
58  
59  
60

|    |                                                                                            |
|----|--------------------------------------------------------------------------------------------|
| 1  |                                                                                            |
| 2  |                                                                                            |
| 3  | <b>McMahon SA (2014)</b>                                                                   |
| 4  | 1                                                                                          |
| 5  | 2                                                                                          |
| 6  |                                                                                            |
| 7  | 2                                                                                          |
| 8  |                                                                                            |
| 9  | 2                                                                                          |
| 10 |                                                                                            |
| 11 | 2                                                                                          |
| 12 |                                                                                            |
| 13 | 2                                                                                          |
| 14 |                                                                                            |
| 15 | 2                                                                                          |
| 16 |                                                                                            |
| 17 | 2                                                                                          |
| 18 |                                                                                            |
| 19 | 1                                                                                          |
| 20 |                                                                                            |
| 21 | 2                                                                                          |
| 22 |                                                                                            |
| 23 | 2                                                                                          |
| 24 |                                                                                            |
| 25 | <b>22</b>                                                                                  |
| 26 |                                                                                            |
| 27 |                                                                                            |
| 28 | Tanzania (2011)                                                                            |
| 29 |                                                                                            |
| 30 |                                                                                            |
| 31 |                                                                                            |
| 32 | 112                                                                                        |
| 33 |                                                                                            |
| 34 | 49 women, 27 male partners, 20 community health workers, 5 community leaders, 11 religious |
| 35 | leaders                                                                                    |
| 36 |                                                                                            |
| 37 |                                                                                            |
| 38 |                                                                                            |
| 39 |                                                                                            |
| 40 |                                                                                            |
| 41 |                                                                                            |
| 42 | Feeling ignored or neglected, monetary demands or discriminatory treatment, verbal abuse,  |
| 43 | physical abuse                                                                             |
| 44 |                                                                                            |
| 45 |                                                                                            |
| 46 |                                                                                            |
| 47 |                                                                                            |
| 48 |                                                                                            |
| 49 |                                                                                            |
| 50 |                                                                                            |
| 51 |                                                                                            |
| 52 |                                                                                            |
| 53 |                                                                                            |
| 54 |                                                                                            |
| 55 |                                                                                            |
| 56 |                                                                                            |
| 57 |                                                                                            |
| 58 |                                                                                            |
| 59 |                                                                                            |
| 60 |                                                                                            |

1  
2  
3  
4  
5  
6  
7  
8  
9  
10  
11  
12  
13  
14  
15  
16 Patients may be made aware of women's rights; include providers in participatory trainings;  
17 trainings must be supported by health system; improve the working environment (general  
18 infrastructure, human resource shortages, deficiencies in supervision and skills training);  
19 inclusion of family members during labour and childbirth  
20  
21  
22  
23  
24  
25  
26  
27  
28  
29  
30  
31  
32  
33  
34  
35  
36  
37  
38  
39  
40  
41  
42  
43  
44  
45  
46  
47  
48  
49  
50  
51  
52  
53  
54  
55  
56  
57  
58  
59  
60

1  
2  
3  
4  
5  
6  
7  
8  
9  
10  
11  
12  
13  
14  
15 Women recounted events or circumstances that are described as abusive in maternal health  
16 literature: feeling ignored or neglected; monetary demands or discriminatory treatment; verbal  
17 abuse; and in rare instances physical abuse. As a response to abuse, women described  
18 acquiescence or non-confrontational strategies: resigning oneself to abuse, returning home, or  
19 bypassing certain facilities or providers. Male respondents described more assertive approaches:  
20 requesting better care, paying a bribe, lodging a complaint and in one case assaulting a provider.  
21  
22  
23  
24  
25  
26  
27  
28  
29  
30  
31  
32  
33  
34

35  
36  
37  
38  
39  
40  
41  
42  
43  
44  
45  
46 Rely on reports, not on direct observation; abuse was not evenly probed in each interview;  
47 captured insights of women who delivered several months earlier and may have a recall bias; did  
48 not reach data saturation; did not interview providers; did not identify and interview escorts  
49  
50  
51  
52  
53  
54  
55  
56  
57  
58  
59  
60

1  
2  
3  
4  
5  
6  
7  
8  
9  
10  
11  
12  
13  
14  
15  
16  
17  
18  
19  
20  
21  
22  
23  
24  
25  
26  
27  
28  
29  
30  
31  
32  
33  
34  
35  
36  
37  
38  
39  
40  
41  
42  
43  
44  
45  
46  
47  
48  
49  
50  
51  
52  
53  
54  
55  
56  
57  
58  
59  
60

|                                |  |
|--------------------------------|--|
| <b>Kujawski S et al (2015)</b> |  |
| 2                              |  |
| 2                              |  |
| 2                              |  |
| 2                              |  |
| 2                              |  |
| 2                              |  |
| 2                              |  |
| 1                              |  |
| 2                              |  |
| 2                              |  |
| 2                              |  |
| 2                              |  |
| 2                              |  |
| 2                              |  |
| <b>23</b>                      |  |
| Tanzania (2011-2012)           |  |
| 1.388                          |  |
| 1,388 postpartum               |  |

1  
2  
3  
4  
5  
6  
7  
8  
9  
10  
11  
12  
13  
14  
15  
16  
17  
18  
19  
20  
21  
22  
23  
24  
25  
26  
27  
28  
29  
30  
31  
32  
33  
34  
35  
36  
37  
38  
39  
40  
41  
42  
43  
44  
45  
46  
47  
48  
49  
50  
51  
52  
53  
54  
55  
56  
57  
58  
59  
60

Satisfaction with delivery, perceived quality of care for delivery, intention to delivery to the same facility for the next birth

Providers empathy; reduce Caesarian sections and financial burden on women and their families; provide information and education; privacy to complain

For peer review only



1  
2  
3  
4  
5  
6  
7  
8 Women who reported any disrespectful and abusive  
9 treatment during childbirth were less likely to be very  
10 satisfied with delivery, were less likely to rate the quality of  
11 care for delivery as excellent or very good, and were also  
12 less likely to plan to deliver at the same facility with their  
13 next child. Women were less likely to be very satisfied  
14 with their delivery if they had at least a secondary  
15 education, had a Caesarean section, and reported  
16 extreme pain during labor and delivery. The oldest  
17 participants, aged 35-48, were also less likely to be very  
18 satisfied with their delivery, compared to the youngest  
19 group, aged 15-19. Those who rated their health as very  
20 good or good were more likely to rate satisfaction and  
21 quality of care positively and were more likely to intend to  
22 deliver at the same facility in the future. Women who were  
23 married and for whom this delivery was their first birth  
24 were less likely to intend to deliver their next child at the  
25 same facility.  
26  
27  
28  
29  
30  
31  
32  
33  
34  
35

36  
37  
38  
39  
40  
41  
42  
43  
44  
45  
46  
47 Lack of a gold standard to measure disrespect and abuse;  
48 did not include some aspects of health system; unable to  
49 discern causality  
50  
51  
52  
53  
54  
55  
56  
57  
58  
59  
60

|    |                                                             |
|----|-------------------------------------------------------------|
| 1  |                                                             |
| 2  | <b>Marin CR et al (2018)</b>                                |
| 3  | 2                                                           |
| 4  | 2                                                           |
| 5  | 2                                                           |
| 6  | 2                                                           |
| 7  | 2                                                           |
| 8  | 2                                                           |
| 9  | 2                                                           |
| 10 | 2                                                           |
| 11 | 2                                                           |
| 12 | 2                                                           |
| 13 | 2                                                           |
| 14 | 2                                                           |
| 15 | 2                                                           |
| 16 | 1                                                           |
| 17 | 1                                                           |
| 18 | 1                                                           |
| 19 | 1                                                           |
| 20 | 2                                                           |
| 21 | 2                                                           |
| 22 | 2                                                           |
| 23 | 2                                                           |
| 24 | <b>21</b>                                                   |
| 25 |                                                             |
| 26 |                                                             |
| 27 |                                                             |
| 28 | Brazil (2015)                                               |
| 29 |                                                             |
| 30 |                                                             |
| 31 | 300                                                         |
| 32 |                                                             |
| 33 |                                                             |
| 34 | 300 patients from a university hospital                     |
| 35 |                                                             |
| 36 |                                                             |
| 37 |                                                             |
| 38 | Touching the patient's possessions without permission,      |
| 39 | changing the bed side table to a position that cannot be    |
| 40 | reached, and raising or lowering the window blinds without  |
| 41 | consulting the patient; Performing a technical procedure in |
| 42 | an intimate area and changing the patient's clothes         |
| 43 | without a screen; Embarrassment due to exposure of the      |
| 44 | body, lack of intimacy and disrespectful behavior by        |
| 45 | nursing professionals                                       |
| 46 |                                                             |
| 47 |                                                             |
| 48 |                                                             |
| 49 |                                                             |
| 50 |                                                             |
| 51 |                                                             |
| 52 |                                                             |
| 53 |                                                             |
| 54 |                                                             |
| 55 |                                                             |
| 56 |                                                             |
| 57 |                                                             |
| 58 |                                                             |
| 59 |                                                             |
| 60 |                                                             |

1  
2  
3  
4 To be more attentive to the patient's space and respect  
5 the territoriality established by them, often with their  
6 personal objects and possessions. Small actions, such as  
7 changing the place of the cell phone or slippers, can  
8 symbolize the removal of territory and generate strong  
9 feelings of discomfort; nudity in front of strangers can be  
10 deeply iatrogenic. Within this context, the age, gender and  
11 culture of the affected subjects can directly affect the  
12 communication dynamics; The patients reported that  
13 requesting permission to manipulate their body, to  
14 examine them or to perform other care/procedure shows  
15 consideration and attention on the part of the professional,  
16 which makes the patient feel valued and in control of the  
17 situation. This approach may minimize the effects of the  
18 invasion and the feeling of being seen as an object; The  
19 respect of territory and personal space represents an  
20 ethical and respectful approach to patients, which can  
21 permit to maintain their dignity even under vulnerable  
22 conditions, favouring their recovery; Healthcare should  
23 respect the individuality and dignity of the patient, not only  
24 including changes in the physical space, but also in the  
25 actions and behavior of healthcare providers regarding  
26 patient privacy.  
27  
28  
29  
30  
31  
32  
33  
34  
35  
36  
37  
38  
39  
40  
41  
42  
43  
44  
45  
46  
47  
48  
49  
50  
51  
52  
53  
54  
55  
56  
57  
58  
59  
60

1  
2  
3  
4  
5  
6  
7  
8  
9 The perception of invasion of territorial space was greater  
10 than that of personal space; the participants reported that  
11 touching their personal possessions without permission,  
12 changing the bedside table to a position that cannot be  
13 reached, and raising or lowering the window blinds without  
14 consulting the patient were attitudes of the nursing staff  
15 that annoyed them and caused a feeling of invasion;  
16 embarrassing attitudes occur when the nursing staff  
17 conduct a technical procedure in an intimate area or  
18 change the patient's clothes without a screen; patients  
19 who had no children and those living with only one person  
20 in the residence perceived greater invasion of their  
21 territorial space; patients who shared the room or were  
22 hospitalized in the maternity ward felt less personal space  
23 invasion  
24  
25  
26  
27  
28  
29  
30  
31  
32  
33  
34

35  
36  
37  
38  
39  
40  
41  
42 Non-random selection of the participants, the fact that it  
43 was performed in only one public hospital in Brazil, which  
44 serves predominantly the maternal and child public and,  
45 consequently, the significant number of female  
46 participants, unbalancing the sample with respect to  
47 gender. The cross-sectional nature of our study can only  
48 provide associations, the study evaluated only self-  
49 reported perceptions of patients and not actual practice by  
50 healthcare staff and the sample is not representative of  
51 other settings in the country.  
52  
53  
54  
55  
56  
57  
58  
59  
60



1  
2  
3  
4  
5  
6  
7  
8  
9  
10  
11  
12  
13  
14  
15  
16  
17  
18  
19  
20  
21  
22  
23  
24  
25  
26  
27  
28  
29  
30  
31  
32  
33  
34  
35  
36  
37  
38  
39  
40  
41  
42  
43  
44  
45  
46  
47  
48  
49  
50  
51  
52  
53  
54  
55  
56  
57  
58  
59  
60

Increase midwifery training in patient's rights and autonomy

To strengthen professional ethics, communication skills, patients' rights, patient's choice, and patients' autonomy training; to explore ways to structure birh experiences in order to empower women; women-centered care

For peer review only

1  
2  
3  
4  
5 The quality of care offered at the facility seemed to be a  
6 factor in women's choice of home rather than facility birth;  
7 patients and providers first, and most frequently, mentioned  
8 verbal abuse; patients mention denial of preferred birth  
9 position, while providers report verbal abuse as the leading  
10 type of violation. Patients reported that providers often  
11 shouted at them or at other patients, mocked them, or spoke  
12 to them in harsh tones; the most common type of physical  
13 abuse witnessed was slapping patients on the legs in order  
14 to get them to comply with midwives' instructions for vaginal  
15 exams or for positioning for labor; patients were allowed to  
16 drink liquids during labor, but food was frequently denied;  
17 most patients were not allowed to give birth in their desired  
18 position, and a large minority were not permitted to have  
19 family members or friends accompany them during delivery;  
20 midwives and midwifery students mentioned observing  
21 practices such as stitching episiotomies without anesthesia,  
22 performing procedures without informing the patient, and  
23 denial of follow-up care to patients who had previously  
24 refused services; patients complained frequently about the  
25 lack of privacy on the wards due to the lack of screens or  
26 curtains and also due to the large number of students who  
27 observe deliveries as part of their training  
28  
29  
30  
31  
32  
33  
34  
35

36  
37  
38  
39  
40  
41  
42  
43  
44  
45  
46  
47  
48 Small sample; limited to a single geographic region; based  
49 on interview and not to direct observation  
50  
51  
52  
53  
54  
55  
56  
57  
58  
59  
60

|    |                                                           |
|----|-----------------------------------------------------------|
| 1  |                                                           |
| 2  | <b>Rodriguez ACI et al (2020)</b>                         |
| 3  |                                                           |
| 4  | 1                                                         |
| 5  | 2                                                         |
| 6  |                                                           |
| 7  | 2                                                         |
| 8  |                                                           |
| 9  | 2                                                         |
| 10 |                                                           |
| 11 | 2                                                         |
| 12 |                                                           |
| 13 | 2                                                         |
| 14 |                                                           |
| 15 | 2                                                         |
| 16 |                                                           |
| 17 | 2                                                         |
| 18 |                                                           |
| 19 | 2                                                         |
| 20 |                                                           |
| 21 | 2                                                         |
| 22 |                                                           |
| 23 | 0                                                         |
| 24 |                                                           |
| 25 | 21                                                        |
| 26 |                                                           |
| 27 |                                                           |
| 28 | USA (2017)                                                |
| 29 |                                                           |
| 30 |                                                           |
| 31 |                                                           |
| 32 | 501                                                       |
| 33 |                                                           |
| 34 | 143 pregnant; 358 postpartum                              |
| 35 |                                                           |
| 36 |                                                           |
| 37 |                                                           |
| 38 |                                                           |
| 39 |                                                           |
| 40 |                                                           |
| 41 | Negative attitudes and unkind or disrespectful treatment; |
| 42 | comments about weight; intense focus on high-risk status  |
| 43 | and potential negative outcomes based on woman's weight;  |
| 44 | inappropriate comments                                    |
| 45 |                                                           |
| 46 |                                                           |
| 47 |                                                           |
| 48 |                                                           |
| 49 |                                                           |
| 50 |                                                           |
| 51 |                                                           |
| 52 |                                                           |
| 53 |                                                           |
| 54 |                                                           |
| 55 |                                                           |
| 56 |                                                           |
| 57 |                                                           |
| 58 |                                                           |
| 59 |                                                           |
| 60 |                                                           |



1  
2  
3  
4  
5  
6  
7  
8  
9  
10  
11  
12  
13  
14  
15  
16 Individualize approach to each woman's weight; take in mind  
17 the potential negative consequences of stigmatizing mothers  
18 for weight; compassionate care, free from stigma; stimulate  
19 breastfeeding, reduce negative expectations about  
20 breastfeeding; investigate postpartum depression symptoms  
21  
22  
23  
24  
25  
26  
27  
28  
29  
30  
31  
32  
33  
34  
35  
36  
37  
38  
39  
40  
41  
42  
43  
44  
45  
46  
47  
48  
49  
50  
51  
52  
53  
54  
55  
56  
57  
58  
59  
60

1  
2  
3  
4 Participants who reported having changed their provider had  
5 a significantly higher pre-pregnancy BMI ( $M = 42.79 \pm 10.89$ )  
6 than those who did not ( $M = 32.92 \pm 10.91$ ),  $F(1, 478) =$   
7  $28.02$ ,  $p < 0.001$ . There was a significant difference in pre-  
8 pregnancy BMI among women who reported that too little ( $M$   
9  $= 31.29 \pm 9.19$ ), the right amount ( $M = 32.97 \pm 11.07$ ), and  
10 too much ( $M = 40.69 \pm 11.58$ ) attention was paid to their  
11 weight,  $F(2, 478) = 13.73$ ,  $p < .001$ . Post-hoc analyses  
12 revealed those reporting too much attention had a  
13 significantly higher pre-pregnancy BMI than others. Those  
14 reporting that they could not trust their provider because of  
15 weight-related treatment also had significantly higher pre-  
16 pregnancy BMIs ( $M = 40.67 \pm 10.64$ ) than those who did not  
17 ( $M = 32.78 \pm 10.97$ ),  $F(1, 479) = 24.95$ ,  $p < 0.001$ . Pregnant  
18 participants who expected that they would feel uncomfortable  
19 seeking help with breastfeeding had a marginally significantly  
20 higher pre-pregnancy BMI ( $M = 40.28 \pm 11.84$ ) than those  
21 who did not ( $M = 34.20 \pm 12.46$ ),  $F(1, 128) = 3.73$ ,  $p <$   
22  $0.056$ . For postpartum participants, those who had felt  
23 uncomfortable seeking help with breastfeeding had  
24 significantly higher pre-pregnancy BMIs ( $M = 36.01 \pm 11.76$ )  
25 than those who had not ( $M = 32.28 \pm 10.20$ ),  $F(1, 282) = 6.68$ ,  $p$   
26  $= 0.010$ .  
27  
28  
29  
30  
31  
32  
33  
34

35  
36  
37  
38  
39  
40  
41  
42  
43  
44  
45 Sample was primarily white of higher socioeconomic status,  
46 large proportion from California, did not investigate other  
47 samples (low-income and racial/ethnic minority mothers),  
48 cannot be generalized  
49  
50  
51  
52  
53  
54  
55  
56  
57  
58  
59  
60



1  
2  
3  
4  
5  
6  
7  
8  
9  
10  
11  
12  
13  
14  
15  
16  
17  
18  
19  
20  
21  
22  
23  
24  
25  
26  
27  
28  
29  
30  
31  
32  
33  
34  
35  
36  
37  
38  
39  
40  
41  
42  
43  
44  
45  
46  
47  
48  
49  
50  
51  
52  
53  
54  
55  
56  
57  
58  
59  
60

Application of Patient Privacy Scale (PPS)

To bring the discussion of patient privacy into light

For peer review only

1  
2  
3  
4  
5  
6  
7  
8  
9  
10  
11  
12  
13  
14  
15 Nurses and the patients in the public hospitals had statistically  
16 significantly higher overall privacy scores than those in the  
17 training and research hospitals. The overall privacy scale scores  
18 were higher and more statistically significant in the patients  
19 hospitalized in surgical clinics than those hospitalized in clinics for  
20 internal diseases and in single compared to married patients.  
21  
22  
23  
24  
25  
26  
27  
28  
29  
30  
31  
32  
33  
34  
35

36  
37  
38  
39  
40  
41  
42  
43  
44  
45  
46  
47 The current study was limited only to the opinions of nurses  
48 working in public hospitals in a city in Turkey and patients  
49 receiving inpatient treatment in these hospitals  
50  
51  
52  
53  
54  
55  
56  
57  
58  
59  
60

|    |                                                                 |
|----|-----------------------------------------------------------------|
| 1  |                                                                 |
| 2  |                                                                 |
| 3  | <b>Ring D et al (2017)</b>                                      |
| 4  | 0                                                               |
| 5  | 2                                                               |
| 6  |                                                                 |
| 7  | 1                                                               |
| 8  |                                                                 |
| 9  | 2                                                               |
| 10 |                                                                 |
| 11 | 2                                                               |
| 12 |                                                                 |
| 13 | 2                                                               |
| 14 |                                                                 |
| 15 | 2                                                               |
| 16 |                                                                 |
| 17 | 2                                                               |
| 18 |                                                                 |
| 19 | 2                                                               |
| 20 |                                                                 |
| 21 | 0                                                               |
| 22 |                                                                 |
| 23 | 2                                                               |
| 24 |                                                                 |
| 25 | <b>19</b>                                                       |
| 26 |                                                                 |
| 27 |                                                                 |
| 28 | USA (1997-2013)                                                 |
| 29 |                                                                 |
| 30 |                                                                 |
| 31 |                                                                 |
| 32 | 1.118                                                           |
| 33 |                                                                 |
| 34 | 1,118 patients complaints                                       |
| 35 |                                                                 |
| 36 |                                                                 |
| 37 |                                                                 |
| 38 |                                                                 |
| 39 |                                                                 |
| 40 |                                                                 |
| 41 |                                                                 |
| 42 | Access and availability, humaneness and disrespect,             |
| 43 | communication, expectations of care and treatment, distrust and |
| 44 | billing                                                         |
| 45 |                                                                 |
| 46 |                                                                 |
| 47 |                                                                 |
| 48 |                                                                 |
| 49 |                                                                 |
| 50 |                                                                 |
| 51 |                                                                 |
| 52 |                                                                 |
| 53 |                                                                 |
| 54 |                                                                 |
| 55 |                                                                 |
| 56 |                                                                 |
| 57 |                                                                 |
| 58 |                                                                 |
| 59 |                                                                 |
| 60 |                                                                 |

1  
2  
3  
4  
5  
6  
7  
8  
9  
10  
11  
12  
13  
14  
15  
16 Improve patients' experiences (optimal communication strategies  
17 and costumer service), increase availability by phone or e-mail of  
18 the staff, improve communication strategies and empathy, to  
19 listen to, to respect, to make patients feel appreciated for who  
20 they are,  
21  
22  
23  
24  
25  
26  
27  
28  
29  
30  
31  
32  
33  
34  
35  
36  
37  
38  
39  
40  
41  
42  
43  
44  
45  
46  
47  
48  
49  
50  
51  
52  
53  
54  
55  
56  
57  
58  
59  
60

1  
2  
3  
4 Women reported more complaints in access and availability,  
5 humaneness and disrespect, and billing; patients aged 40 to 60  
6 years were more likely to file a complaint in all categories except  
7 distrust (most common in patients over age 80) and research;  
8 most complaints concerned the surgeon (58%) or the  
9 administrative assistant (32%). Over half of all complaints were  
10 related to interpersonal issues [humaneness/ disrespect (20%),  
11 expectation of care and treatment (20%), communication (14%)  
12 and distrust (3.6%)]; the most common type of complaint per year  
13 from 1997 to 2012 was access and availability except during  
14 2004 when it was humaneness/disrespect. In the access and  
15 availability category, accessibility via telephone and e-mail (34%),  
16 wait time (24%), and physical absence of clinician/cancellation of  
17 appointment (18%) were the three most common sources of  
18 complaint. Regarding the category of humaneness/ disrespect,  
19 the most common description was unprofessional (38%), then  
20 rudeness (34%), and condescending (15%). 76% of  
21 communication category complaints were attributed to  
22 miscommunication between the patient and surgeon, while care  
23 and treatment complaints involved disputes about treatment,  
24 followed by diagnostic issues, and referrals. Many treatment-  
25 related complaints addressed medication (most often opioids)  
26 and dissatisfaction with the outcome of surgery.  
27  
28  
29  
30  
31  
32  
33  
34

35  
36  
37  
38  
39  
40  
41  
42  
43  
44 Limited to one hospital; underreporting of complaints, variability of  
45 complaints may be due to variability in ombudsperson, patient may  
46 have the idea that complaint would not be addressed, differences  
47 in reporting by age may be due to more treating patients that  
48 ages, complaints addressed only in major negative experiences  
49  
50  
51  
52  
53  
54  
55  
56  
57  
58  
59  
60





1  
2  
3  
4  
5  
6  
7  
8  
9  
10  
11  
12  
13  
14  
15  
16  
17  
18  
19  
20  
21  
22  
23  
24  
25  
26  
27  
28  
29  
30  
31  
32  
33  
34  
35  
36  
37  
38  
39  
40  
41  
42  
43  
44  
45  
46  
47  
48  
49  
50  
51  
52  
53  
54  
55  
56  
57  
58  
59  
60

Two-part questionnaire administered by two interviewers

Train and observe confidentiality and privacy issues, to promote the observance of patients' rights; both healthcare providers and recipients be informed about these issues; education may be provided upon admission or at any other appropriate time via provision of oral explanation as well as written media such as pamphlets, brochures, booklets, etc.; Health policy makers should develop and implement a plan for raising patients' awareness of privacy and confidentiality to improve physician-patient relationships;

1  
2  
3  
4  
5 153 patients provided a correct definition of privacy, and 161 patients were  
6 aware of instances of privacy violation; 77 patients had good awareness of  
7 physician confidentiality, 46 patients believed that physicians could disclose  
8 patients' information to reduce or eliminate a significant risk of serious harm  
9 to others, 47 patients did not think it was necessary for physicians to obtain  
10 patients' consent before consulting with their families, 105 patients did not  
11 believe that physicians needed patients' permission to consult with their  
12 colleagues or other members of the medical team in cases of multidisciplinary  
13 diagnosis and treatment, 28 patients were aware that disclosing patient's  
14 information is unethical, against religion, and illegal, 113 patients had  
15 previously known that medical information pertaining to mentally retarded  
16 patients should be recounted to their parents or guardians, 39 patients did not  
17 consider the results of medical examinations and tests as confidential in  
18 cases where patient security, employment, insurance issues and legal  
19 competency were concerned, and 47 patients were not aware that in  
20 research studies it is essential not to disclose patients' identity, 158 patients  
21 had good awareness of the confidentiality of examination results and medical  
22 consultations; 15 patients were not aware that in case of patients' decision to  
23 commit suicide or homicide, physicians must inform the relevant authorities;  
24 whether male physicians should be allowed to perform physical examinations  
25 on female patients, 81 patients answered that they should, where it was a  
26 matter of saving lives. It may therefore be concluded that they had a good  
27 level of awareness in this regard  
28  
29  
30  
31  
32  
33  
34  
35

36  
37  
38  
39  
40  
41  
42  
43  
44  
45  
46  
47  
48 The authors did not state the limitations of this study  
49  
50  
51  
52  
53  
54  
55  
56  
57  
58  
59  
60

|    |                                                                                |
|----|--------------------------------------------------------------------------------|
| 1  |                                                                                |
| 2  |                                                                                |
| 3  | <b>Ma CC (2014)</b>                                                            |
| 4  | 2                                                                              |
| 5  | 2                                                                              |
| 6  |                                                                                |
| 7  | 2                                                                              |
| 8  |                                                                                |
| 9  | 1                                                                              |
| 10 | 1                                                                              |
| 11 |                                                                                |
| 12 | 1                                                                              |
| 13 |                                                                                |
| 14 | 2                                                                              |
| 15 | 1                                                                              |
| 16 | 1                                                                              |
| 17 | 1                                                                              |
| 18 |                                                                                |
| 19 | 1                                                                              |
| 20 |                                                                                |
| 21 | 2                                                                              |
| 22 |                                                                                |
| 23 | 2                                                                              |
| 24 |                                                                                |
| 25 | <b>18</b>                                                                      |
| 26 |                                                                                |
| 27 |                                                                                |
| 28 | Taiwan (2012)                                                                  |
| 29 |                                                                                |
| 30 |                                                                                |
| 31 |                                                                                |
| 32 | 204                                                                            |
| 33 |                                                                                |
| 34 | 204 patients > 18 years-old                                                    |
| 35 |                                                                                |
| 36 |                                                                                |
| 37 |                                                                                |
| 38 |                                                                                |
| 39 |                                                                                |
| 40 |                                                                                |
| 41 |                                                                                |
| 42 | To evaluate patient's concerns about privacy of EMRs data; to evaluate         |
| 43 | patient's behavioural responses of patients to their perception of information |
| 44 | privacy concerns resulting from information practices of medical facilities    |
| 45 |                                                                                |
| 46 |                                                                                |
| 47 |                                                                                |
| 48 |                                                                                |
| 49 |                                                                                |
| 50 |                                                                                |
| 51 |                                                                                |
| 52 |                                                                                |
| 53 |                                                                                |
| 54 |                                                                                |
| 55 |                                                                                |
| 56 |                                                                                |
| 57 |                                                                                |
| 58 |                                                                                |
| 59 |                                                                                |
| 60 |                                                                                |

1  
2  
3  
4  
5  
6  
7  
8  
9  
10  
11  
12  
13  
14  
15  
16  
17 Institutions and governments need to ensure data protection to each  
18 individual; to protect data from use without patient's consent; to develop  
19 privacy protection policies to reduce patient's privacy information concerns  
20  
21  
22  
23  
24  
25  
26  
27  
28  
29  
30  
31  
32  
33  
34  
35  
36  
37  
38  
39  
40  
41  
42  
43  
44  
45  
46  
47  
48  
49  
50  
51  
52  
53  
54  
55  
56  
57  
58  
59  
60

1  
2  
3  
4  
5  
6  
7  
8  
9  
10  
11 Collection of information, secondary use of information and errors in data  
12 collection were primary factors in arousing patients' information privacy  
13 protective responses toward electronic medical records (EMRs); governments  
14 and medical facilities should focus on these findings and develop EMR  
15 privacy protection policies to reduce people's information privacy concerns;  
16 patients took protective responses towards EMRs when their information  
17 privacy concerns were invaded; the lack of attention to these relationships in  
18 the healthcare context is problematic because of the influence of these  
19 relationships on the promotion of EMRs in the future; the development of  
20 EMRs by those responsible for formulating and implementing information-  
21 privacy protection procedures in organisational and societal contexts is  
22 needed.  
23  
24  
25  
26  
27  
28  
29  
30  
31  
32  
33  
34

35  
36  
37  
38  
39  
40 This study only looked at people who access Electronic Medical Records  
41 (EMRs) without authorisation as staff at the medical facility, which might  
42 ignore other unauthorised access by individuals not associated with the  
43 medical facility. Further, the external validity of the findings may be limited as  
44 the sample was collected from one hospital in Taiwan only. Consequently,  
45 inferences to other populations cannot be made safely. However, the  
46 collected sample possessed certain demographic characteristic (e.g. gender)  
47 in the same proportion as the Taiwanese population, although there were  
48 some differences in age and education, meaning that these results may be  
49 generalisable to other Taiwanese hospitals. Future research could expand on  
50 the present study's findings by using a more representative sample in other  
51 geographical settings.  
52  
53  
54  
55  
56  
57  
58  
59  
60

| CRITICAL APPRAISAL SCORES                              |                                     |                               |                                                                                   |
|--------------------------------------------------------|-------------------------------------|-------------------------------|-----------------------------------------------------------------------------------|
| Individual item score (color and value)                |                                     |                               | (a) Did not cite explicitly the data collection date/time frame (e.g. month/year) |
| 0 = not or inadequately addressed or applied           | 1 = adequately addressed or applied | 2 = well addressed or applied |                                                                                   |
| Total Score Appraisal by study design, color and value |                                     |                               |                                                                                   |
|                                                        | Low quality                         | Moderate quality              | High quality                                                                      |
| Qualitative studies                                    | 0-7                                 | 8-14                          | 15-20                                                                             |
| Cross-sectional studies                                | 0-9                                 | 10-17                         | 18-24                                                                             |
| Cohort study                                           | 0-9                                 | 10-17                         | 18-24                                                                             |
| Quali-quantitative and convergent parallel mixed-      | 0-4                                 | 5-9                           | 10-14                                                                             |

|  |                                                       |
|--|-------------------------------------------------------|
|  |                                                       |
|  |                                                       |
|  | <b>Issue</b>                                          |
|  | <b>Recruitment</b>                                    |
|  | <b>Exposure</b>                                       |
|  | <b>Outcome</b>                                        |
|  | <b>Confounding factors identification</b>             |
|  | <b>Confounding factors taken into account</b>         |
|  | <b>Follow up complete</b>                             |
|  | <b>Follow up long enough</b>                          |
|  | <b>Results</b>                                        |
|  | <b>Precision of the results</b>                       |
|  | <b>Believe the results</b>                            |
|  | <b>Results applied</b>                                |
|  | <b>Results fit</b>                                    |
|  | <b>Implications for practice</b>                      |
|  | <b>Total</b>                                          |
|  | <b>Country (year of research and data collection)</b> |
|  | <b>Sample size</b>                                    |
|  | <b>Type of samples</b>                                |

raisal Skills Programme)



1  
2  
3  
4  
5  
6  
7  
8  
9  
10  
11  
12  
13  
14  
15  
16  
17  
18  
19  
20  
21  
22  
23  
24  
25  
26  
27  
28  
29  
30  
31  
32  
33  
34  
35  
36  
37  
38  
39  
40  
41  
42  
43  
44  
45  
46  
47  
48  
49  
50  
51  
52  
53  
54  
55  
56  
57  
58  
59  
60

**Table 3 - CASP Cohort Studies Checklist (Critical Appraisal)**

|                                                                         |
|-------------------------------------------------------------------------|
| <p><b>STRATEGIES, BEHAVIORS<br/>AND/OR OUTCOMES OF<br/>INTEREST</b></p> |
| <p><b>INTERVENTIONS<br/>TO ACHIEVE<br/>IMPROVEMENTS</b></p>             |
| <p><b>RESULTS</b></p>                                                   |

For peer review only

1  
2  
3  
4  
5  
6  
7  
8  
9  
10  
11  
12  
13  
14  
15  
16  
17  
18  
19  
20  
21  
22  
23  
24  
25  
26  
27  
28  
29  
30  
31  
32  
33  
34  
35  
36  
37  
38  
39  
40  
41  
42  
43  
44  
45  
46  
47  
48  
49  
50  
51  
52  
53  
54  
55  
56  
57  
58  
59  
60

|  |                    |
|--|--------------------|
|  | <b>LIMITATIONS</b> |
|--|--------------------|

For peer review only

1  
2  
3  
4  
5  
6  
7  
8  
9  
10  
11  
12  
13  
14  
15  
16  
17  
18  
19  
20  
21  
22  
23  
24  
25  
26  
27  
28  
29  
30  
31  
32  
33  
34  
35  
36  
37  
38  
39  
40  
41  
42  
43  
44  
45  
46  
47  
48  
49  
50  
51  
52  
53  
54  
55  
56  
57  
58  
59  
60

|                                                                                       |  |
|---------------------------------------------------------------------------------------|--|
| <b>Skyman E et al (2014)</b>                                                          |  |
| 2                                                                                     |  |
| 2                                                                                     |  |
| 2                                                                                     |  |
| 2                                                                                     |  |
| 2                                                                                     |  |
| 1                                                                                     |  |
| 1                                                                                     |  |
| 2                                                                                     |  |
| 2                                                                                     |  |
| 2                                                                                     |  |
| 2                                                                                     |  |
| 2                                                                                     |  |
| 2                                                                                     |  |
| 1                                                                                     |  |
| 1                                                                                     |  |
| 1                                                                                     |  |
| <b>23</b>                                                                             |  |
| Sweden (2004/2011)                                                                    |  |
| 202                                                                                   |  |
| 2004: 92 patients (Card: 71, No card: 21); 2011: 110 patients (Card: 91, No card: 19) |  |

1  
2  
3  
4  
5  
6  
7 Disrespect and humiliation, Lack of knowledge, Unprofessionalism,  
8 Responsibility not to spreading MRSA  
9  
10  
11  
12  
13  
14

15  
16  
17 To reduce uncertainty, offence, anger and discrimination; to educate  
18 patients and healthcare workers; to inform patients and health care  
19 providers; to manage patients feelings ; to preserve patients' dignity; to  
20 educate health care providers  
21  
22  
23  
24

25  
26  
27 Patients felt pointed out in a negative way by receiving a notification  
28 card; a majority reported that they always or almost always had shown  
29 the card when seeking hospital or outpatient care, and for dental care  
30 the number was significantly higher in 2011 (57.14%) than in 2004  
31 (30.98%) ( $p=0.004$ ); 81% stated that it is good to have a card in 2004,  
32 and 62% in 2011; 38% reported health care workers (HCW) were  
33 familiar with the card in 2004, and it increased significantly (45%) in  
34 2011 ( $p=0.036$ ); patients reporting HCW took no notice of the card  
35 (21% in 2004, 11% in 2011,  $p=0.004$ ). Very few actively stated that the  
36 HCW were unfamiliar with the card (15.5% in 2004, 5.5% in 2011,  
37  $p=0.036$ ). Almost half of the patients indicated positive reactions when  
38 presenting the notification card (45% in 2004, 47.2% in 2011,  $p=0.445$ ).  
39 A higher number however, responded that they were met with despair  
40 and fear (9.86% in 2004, 34% in 2011,  $p=0.052$ ). Patients claimed  
41 unknown acquisition (70% in 2004), of whom 75% believed wrongly  
42 that they had been infected in the hospital. In 2011, there was a  
43 tendency towards increased unawareness (47.27%), as compared to  
44 2004, but the difference was not significant. The dominant  
45 misconception was still hospital acquisition (81%), even though the  
46 perceived hospital acquired-MRSA rate decreased significantly (19% in  
47 2011, 42.4% in 2004,  $p<0.001$ ). Few stated community acquisition in  
48 both groups (5% and 21%).  
49  
50  
51  
52  
53  
54  
55  
56  
57  
58  
59  
60

1  
2  
3  
4 Low response rates, patients with negative experiences may be more  
5 willing to to respond  
6  
7  
8  
9  
10  
11  
12  
13  
14  
15  
16  
17  
18  
19  
20  
21  
22  
23  
24  
25  
26  
27  
28  
29  
30  
31  
32  
33  
34  
35  
36  
37  
38  
39  
40  
41  
42  
43  
44  
45  
46  
47  
48  
49  
50  
51  
52  
53  
54  
55  
56  
57  
58  
59  
60

For peer review only

| CRITICAL APPRAISAL SCORES                                       |                                     |                               |                                                                                   |
|-----------------------------------------------------------------|-------------------------------------|-------------------------------|-----------------------------------------------------------------------------------|
| Individual item score (color and value)                         |                                     |                               | (a) Did not cite explicitly the data collection date/time frame (e.g. month/year) |
| 0 = not or inadequately addressed or applied                    | 1 = adequately addressed or applied | 2 = well addressed or applied |                                                                                   |
| Total Score Appraisal by study design, color and value          |                                     |                               |                                                                                   |
|                                                                 | Low quality                         | Moderate quality              | High quality                                                                      |
| Qualitative studies                                             | 0-7                                 | 8-14                          | 15-20                                                                             |
| Cross-sectional studies                                         | 0-9                                 | 10-17                         | 18-24                                                                             |
| Cohort study                                                    | 0-9                                 | 10-17                         | 18-24                                                                             |
| Quali-quantitative and convergent parallel mixed-method studies | 0-4                                 | 5-9                           | 10-14                                                                             |

|                                                                             |                                                       |                                                                                                                             |
|-----------------------------------------------------------------------------|-------------------------------------------------------|-----------------------------------------------------------------------------------------------------------------------------|
| <b>ia (Quali-quantitative and convergent parallel mixed-method studies)</b> |                                                       | <b>Sanson G <i>et al</i> (2020)</b>                                                                                         |
|                                                                             | <b>Worth or relevance</b>                             | 2                                                                                                                           |
|                                                                             | <b>Clear question</b>                                 | 2                                                                                                                           |
|                                                                             | <b>Design</b>                                         | 2                                                                                                                           |
|                                                                             | <b>Context</b>                                        | 2                                                                                                                           |
|                                                                             | <b>Sampling</b>                                       | 1                                                                                                                           |
|                                                                             | <b>Data collection and analysis</b>                   | 1                                                                                                                           |
|                                                                             | <b>Reflexivity</b>                                    | 2                                                                                                                           |
|                                                                             | <b>Total</b>                                          | <b>12</b>                                                                                                                   |
|                                                                             | <b>Country (year of research and data collection)</b> | Italy (2015)                                                                                                                |
|                                                                             | <b>Sample size</b>                                    | 100                                                                                                                         |
|                                                                             | <b>Type of samples</b>                                | 100 Intensive Care Unit (ICU) patients                                                                                      |
|                                                                             | <b>STRATEGIES/BEHAVIOR S/OUTCOMES OF INTEREST</b>     | To identify perceptions about the ICU environment; to reduce discomfort of tubes and procedures, room temperature, position |

## Critical Appraisal according to Mays &amp; Pope (2000) Criteria

|                                                     |                                                                                                                                                                                                                                                                                                                                                                                                                                                                                                |
|-----------------------------------------------------|------------------------------------------------------------------------------------------------------------------------------------------------------------------------------------------------------------------------------------------------------------------------------------------------------------------------------------------------------------------------------------------------------------------------------------------------------------------------------------------------|
| <p><b>INTERVENTIONS TO ACHIEVE IMPROVEMENTS</b></p> | <p>Environmental control to reduce disstress, to allow more time for family visits for some patients and less for others, clock visible to all patients, windows (daylight and night), to explain ICU bans and rules to patients; Pain control, change positions, manage visual fields</p>                                                                                                                                                                                                     |
| <p><b>RESULTS</b></p>                               | <p>Patients reported that they had a clear remembrance of their ICU stay; the patients with no clear memory of their ICU stay had significantly worse, and a longer length of mechanical ventilation and ICU stay; intrusive memories related to their stays in the ICU.</p>                                                                                                                                                                                                                   |
| <p><b>LIMITATIONS</b></p>                           | <p>Using a data saturation method has been questioned, because it could introduce a certain degree of uncertainty and ambiguity when it tries to find the unobserved on the basis of what is observed.</p> <p>The study enrolled vulnerable participants, some of which had a partial recollection of their ICU experiences. The interviews were carried out in hospital and the interviewer was a health care professional; this situation may have influenced the participants' answers.</p> |



|                                                                                                                                                                                                                                                                                                                                                        |  |
|--------------------------------------------------------------------------------------------------------------------------------------------------------------------------------------------------------------------------------------------------------------------------------------------------------------------------------------------------------|--|
| <b>Santos LR et al (2005) (a)</b>                                                                                                                                                                                                                                                                                                                      |  |
| 2                                                                                                                                                                                                                                                                                                                                                      |  |
| 2                                                                                                                                                                                                                                                                                                                                                      |  |
| 2                                                                                                                                                                                                                                                                                                                                                      |  |
| 2                                                                                                                                                                                                                                                                                                                                                      |  |
| 1                                                                                                                                                                                                                                                                                                                                                      |  |
| 2                                                                                                                                                                                                                                                                                                                                                      |  |
| 1                                                                                                                                                                                                                                                                                                                                                      |  |
| 12                                                                                                                                                                                                                                                                                                                                                     |  |
| Brazil (??)                                                                                                                                                                                                                                                                                                                                            |  |
| 73                                                                                                                                                                                                                                                                                                                                                     |  |
| 73 general hospital inpatients                                                                                                                                                                                                                                                                                                                         |  |
| Satisfaction with the service provided;<br>Requesting authorization for<br>administering medication and carrying out<br>exams, as well as providing prior<br>information; communication of tests<br>results; clarification about the diagnosis;<br>participation in the choice of treatment;<br>problems experienced or observed in the<br>institution |  |

| CRITICAL APPRAISAL S                                            |                                     |                               |
|-----------------------------------------------------------------|-------------------------------------|-------------------------------|
| Individual item score (color and value)                         |                                     |                               |
| 0 = not or inadequately addressed or applied                    | 1 = adequately addressed or applied | 2 = well addressed or applied |
| Total Score Appraisal by study desi                             |                                     |                               |
|                                                                 |                                     | Low quality                   |
| Qualitative studies                                             |                                     | 0-7                           |
| Cross-sectional studies                                         |                                     | 0-9                           |
| Cohort study                                                    |                                     | 0-9                           |
| Quali-quantitative and convergent parallel mixed-method studies |                                     | 0-4                           |

1  
2  
3 To ask for patients' authorization to  
4 examine them, to touch; to explain the  
5 procedure/exam; to discuss its  
6 indications, options, and risks; to give  
7 information about the patients' rights,  
8 conditions, the function of medications, to  
9 clarify their doubts; to allow patients to  
10 decide what is best for them; to use clear  
11 and understandable language when  
12 talking to patients  
13  
14  
15

16  
17 Patients who were interviewed did not  
18 receive information about the function of  
19 the medication they were given; they  
20 were not asked to or were not informed  
21 about procedures; they did not receive  
22 any information about consent and were  
23 not asked to consent; they were not  
24 asked about the route of administering  
25 their medication by the physician  
26  
27  
28  
29

30  
31  
32  
33  
34  
35  
36  
37  
38 Small sample, limited geographic area,  
39 data collection time frame not cited  
40  
41  
42  
43  
44  
45  
46  
47  
48  
49  
50

1  
2  
3  
4  
5  
6  
7  
8  
9  
10  
11  
12  
13  
14  
15  
16  
17  
18  
19  
20  
21  
22  
23  
24  
25  
26  
27  
28  
29  
30  
31  
32  
33  
34  
35  
36  
37  
38  
39  
40  
41  
42  
43  
44  
45  
46  
47  
48  
49  
50  
51  
52  
53  
54  
55  
56  
57  
58  
59  
60

|                                                                                   |                     |
|-----------------------------------------------------------------------------------|---------------------|
| <b>SCORES</b>                                                                     |                     |
| (a) Did not cite explicitly the data collection date/time frame (e.g. month/year) |                     |
| <b>Sign, color and value</b>                                                      |                     |
| <b>Moderate quality</b>                                                           | <b>High quality</b> |
| 8-14                                                                              | 15-20               |
| 10-17                                                                             | 18-24               |
| 10-17                                                                             | 18-24               |
| 5-9                                                                               | 10-14               |

For peer review only

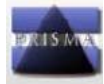

## PRISMA 2020 for Abstracts Checklist

| Section and Topic       | Item # | Checklist item                                                                                                                                                                                                                                                                                        | Reported (Yes/No) |
|-------------------------|--------|-------------------------------------------------------------------------------------------------------------------------------------------------------------------------------------------------------------------------------------------------------------------------------------------------------|-------------------|
| <b>TITLE</b>            |        |                                                                                                                                                                                                                                                                                                       |                   |
| Title                   | 1      | Identify the report as a systematic review.                                                                                                                                                                                                                                                           | Page 2 - Yes      |
| <b>BACKGROUND</b>       |        |                                                                                                                                                                                                                                                                                                       |                   |
| Objectives              | 2      | Provide an explicit statement of the main objective(s) or question(s) the review addresses.                                                                                                                                                                                                           | Page 2 - Yes      |
| <b>METHODS</b>          |        |                                                                                                                                                                                                                                                                                                       |                   |
| Eligibility criteria    | 3      | Specify the inclusion and exclusion criteria for the review.                                                                                                                                                                                                                                          | Page 2 - Yes      |
| Information sources     | 4      | Specify the information sources (e.g. databases, registers) used to identify studies and the date when each was last searched.                                                                                                                                                                        | Page 2 - Yes      |
| Risk of bias            | 5      | Specify the methods used to assess risk of bias in the included studies.                                                                                                                                                                                                                              | Page 2 - Yes      |
| Synthesis of results    | 6      | Specify the methods used to present and synthesise results.                                                                                                                                                                                                                                           | Page 2 - Yes      |
| <b>RESULTS</b>          |        |                                                                                                                                                                                                                                                                                                       |                   |
| Included studies        | 7      | Give the total number of included studies and participants and summarise relevant characteristics of studies.                                                                                                                                                                                         | Page 2 - Yes      |
| Synthesis of results    | 8      | Present results for main outcomes, preferably indicating the number of included studies and participants for each. If meta-analysis was done, report the summary estimate and confidence/credible interval. If comparing groups, indicate the direction of the effect (i.e. which group is favoured). | Page 2 - Yes      |
| <b>DISCUSSION</b>       |        |                                                                                                                                                                                                                                                                                                       |                   |
| Limitations of evidence | 9      | Provide a brief summary of the limitations of the evidence included in the review (e.g. study risk of bias, inconsistency and imprecision).                                                                                                                                                           | Page 2 - Yes      |
| Interpretation          | 10     | Provide a general interpretation of the results and important implications.                                                                                                                                                                                                                           | Page 2 - Yes      |
| <b>OTHER</b>            |        |                                                                                                                                                                                                                                                                                                       |                   |
| Funding                 | 11     | Specify the primary source of funding for the review.                                                                                                                                                                                                                                                 | Page 2 - Yes      |
| Registration            | 12     | Provide the register name and registration number.                                                                                                                                                                                                                                                    | Page 2 - Yes      |



## PRISMA 2020 for Abstracts Checklist

1  
2  
3  
4  
5  
6  
7  
8  
9  
10  
11  
12  
13  
14  
15  
16  
17  
18  
19  
20  
21  
22  
23  
24  
25  
26  
27  
28  
29  
30  
31  
32  
33  
34  
35  
36  
37  
38  
39  
40  
41  
42  
43  
44  
45  
46  
47

*From:* Page MJ, McKenzie JE, Bossuyt PM, Boutron I, Hoffmann TC, Mulrow CD, et al. The PRISMA 2020 statement: an updated guideline for reporting systematic reviews. *BMJ* 2021;372:n71. doi: 10.1136/bmj.n71

For more information, visit: <http://www.prisma-statement.org/>

For peer review only

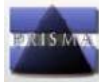

## PRISMA 2020 Checklist

| Section and Topic             | Item # | Checklist item                                                                                                                                                                                                                                                                                       | Location where item is reported |
|-------------------------------|--------|------------------------------------------------------------------------------------------------------------------------------------------------------------------------------------------------------------------------------------------------------------------------------------------------------|---------------------------------|
| <b>TITLE</b>                  |        |                                                                                                                                                                                                                                                                                                      |                                 |
| Title                         | 1      | Identify the report as a systematic review.                                                                                                                                                                                                                                                          | Page 2                          |
| <b>ABSTRACT</b>               |        |                                                                                                                                                                                                                                                                                                      |                                 |
| Abstract                      | 2      | See the PRISMA 2020 for Abstracts checklist.                                                                                                                                                                                                                                                         | Page 2                          |
| <b>INTRODUCTION</b>           |        |                                                                                                                                                                                                                                                                                                      |                                 |
| Rationale                     | 3      | Describe the rationale for the review in the context of existing knowledge.                                                                                                                                                                                                                          | Page 2-3                        |
| Objectives                    | 4      | Provide an explicit statement of the objective(s) or question(s) the review addresses.                                                                                                                                                                                                               | Page 3                          |
| <b>METHODS</b>                |        |                                                                                                                                                                                                                                                                                                      |                                 |
| Eligibility criteria          | 5      | Specify the inclusion and exclusion criteria for the review and how studies were grouped for the syntheses.                                                                                                                                                                                          | Page 3                          |
| Information sources           | 6      | Specify all databases, registers, websites, organisations, reference lists and other sources searched or consulted to identify studies. Specify the date when each source was last searched or consulted.                                                                                            | Page 3                          |
| Search strategy               | 7      | Present the full search strategies for all databases, registers and websites, including any filters and limits used.                                                                                                                                                                                 | Page 3                          |
| Selection process             | 8      | Specify the methods used to decide whether a study met the inclusion criteria of the review, including how many reviewers screened each record and each report retrieved, whether they worked independently, and if applicable, details of automation tools used in the process.                     | Page 3                          |
| Data collection process       | 9      | Specify the methods used to collect data from reports, including how many reviewers collected data from each report, whether they worked independently, any processes for obtaining or confirming data from study investigators, and if applicable, details of automation tools used in the process. | Page 3                          |
| Data items                    | 10a    | List and define all outcomes for which data were sought. Specify whether all results that were compatible with each outcome domain in each study were sought (e.g. for all measures, time points, analyses), and if not, the methods used to decide which results to collect.                        | Page 3                          |
|                               | 10b    | List and define all other variables for which data were sought (e.g. participant and intervention characteristics, funding sources). Describe any assumptions made about any missing or unclear information.                                                                                         | Page 3                          |
| Study risk of bias assessment | 11     | Specify the methods used to assess risk of bias in the included studies, including details of the tool(s) used, how many reviewers assessed each study and whether they worked independently, and if applicable, details of automation tools used in the process.                                    | Pages 3 and 11                  |
| Effect measures               | 12     | Specify for each outcome the effect measure(s) (e.g. risk ratio, mean difference) used in the synthesis or presentation of results.                                                                                                                                                                  | Not applicable                  |
| Synthesis methods             | 13a    | Describe the processes used to decide which studies were eligible for each synthesis (e.g. tabulating the study intervention characteristics and comparing against the planned groups for each synthesis (item #5)).                                                                                 | Page 3                          |
|                               | 13b    | Describe any methods required to prepare the data for presentation or synthesis, such as handling of missing summary statistics, or data conversions.                                                                                                                                                | Page 3                          |
|                               | 13c    | Describe any methods used to tabulate or visually display results of individual studies and syntheses.                                                                                                                                                                                               | Page 3                          |
|                               | 13d    | Describe any methods used to synthesize results and provide a rationale for the choice(s). If meta-analysis was performed, describe the model(s), method(s) to identify the presence and extent of statistical heterogeneity, and software package(s) used.                                          | Pages 3-6, and pages 8-11       |
|                               | 13e    | Describe any methods used to explore possible causes of heterogeneity among study results (e.g. subgroup analysis, meta-regression).                                                                                                                                                                 | Pages 3-4                       |
|                               | 13f    | Describe any sensitivity analyses conducted to assess robustness of the synthesized results.                                                                                                                                                                                                         | Pages 3, 4, 8                   |
| Reporting bias                | 14     | Describe any methods used to assess risk of bias due to missing results in a synthesis (arising from reporting biases).                                                                                                                                                                              | Pages 3, 11                     |

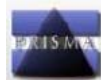

## PRISMA 2020 Checklist

| Section and Topic             | Item # | Checklist item                                                                                                                                                                                                                                                                       | Location where item is reported |
|-------------------------------|--------|--------------------------------------------------------------------------------------------------------------------------------------------------------------------------------------------------------------------------------------------------------------------------------------|---------------------------------|
| assessment                    |        |                                                                                                                                                                                                                                                                                      |                                 |
| Certainty assessment          | 15     | Describe any methods used to assess certainty (or confidence) in the body of evidence for an outcome.                                                                                                                                                                                | Page 8                          |
| <b>RESULTS</b>                |        |                                                                                                                                                                                                                                                                                      |                                 |
| Study selection               | 16a    | Describe the results of the search and selection process, from the number of records identified in the search to the number of studies included in the review, ideally using a flow diagram.                                                                                         | Pages 3,4                       |
|                               | 16b    | Cite studies that might appear to meet the inclusion criteria, but which were excluded, and explain why they were excluded.                                                                                                                                                          | Page 4                          |
| Study characteristics         | 17     | Cite each included study and present its characteristics.                                                                                                                                                                                                                            | Page 4-6                        |
| Risk of bias in studies       | 18     | Present assessments of risk of bias for each included study.                                                                                                                                                                                                                         | Page 11                         |
| Results of individual studies | 19     | For all outcomes, present, for each study: (a) summary statistics for each group (where appropriate) and (b) an effect estimate and its precision (e.g. confidence/credible interval), ideally using structured tables or plots.                                                     | Pages 3-8                       |
| Results of syntheses          | 20a    | For each synthesis, briefly summarise the characteristics and risk of bias among contributing studies.                                                                                                                                                                               | Page 11                         |
|                               | 20b    | Present results of all statistical syntheses conducted. If meta-analysis was done, present for each the summary estimate and its precision (e.g. confidence/credible interval) and measures of statistical heterogeneity. If comparing groups, describe the direction of the effect. | Not applicable                  |
|                               | 20c    | Present results of all investigations of possible causes of heterogeneity among study results.                                                                                                                                                                                       | Page 13                         |
|                               | 20d    | Present results of all sensitivity analyses conducted to assess the robustness of the synthesized results.                                                                                                                                                                           | Pages 8-11                      |
| Reporting biases              | 21     | Present assessments of risk of bias due to missing results (arising from reporting biases) for each synthesis assessed.                                                                                                                                                              | Page 4, 13                      |
| Certainty of evidence         | 22     | Present assessments of certainty (or confidence) in the body of evidence for each outcome assessed.                                                                                                                                                                                  | Pages 8-11                      |
| <b>DISCUSSION</b>             |        |                                                                                                                                                                                                                                                                                      |                                 |
| Discussion                    | 23a    | Provide a general interpretation of the results in the context of other evidence.                                                                                                                                                                                                    | Pages 11-13                     |
|                               | 23b    | Discuss any limitations of the evidence included in the review.                                                                                                                                                                                                                      | Page 13                         |
|                               | 23c    | Discuss any limitations of the review processes used.                                                                                                                                                                                                                                | Page 13                         |
|                               | 23d    | Discuss implications of the results for practice, policy, and future research.                                                                                                                                                                                                       | Pages 13, 14                    |
| <b>OTHER INFORMATION</b>      |        |                                                                                                                                                                                                                                                                                      |                                 |
| Registration and protocol     | 24a    | Provide registration information for the review, including register name and registration number, or state that the review was not registered.                                                                                                                                       | Pages 2, 3, 14                  |
|                               | 24b    | Indicate where the review protocol can be accessed, or state that a protocol was not prepared.                                                                                                                                                                                       | PROSPERO                        |
|                               | 24c    | Describe and explain any amendments to information provided at registration or in the protocol.                                                                                                                                                                                      | None                            |
| Support                       | 25     | Describe sources of financial or non-financial support for the review, and the role of the funders or sponsors in the review.                                                                                                                                                        | Page 14                         |
| Competing interests           | 26     | Declare any competing interests of review authors.                                                                                                                                                                                                                                   | Page 14                         |

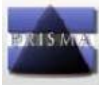

# PRISMA 2020 Checklist

1  
2  
3  
4  
5  
6  
7  
8  
9  
10  
11  
12  
13  
14  
15  
16  
17  
18  
19  
20  
21  
22  
23  
24  
25  
26  
27  
28  
29  
30  
31  
32  
33  
34  
35  
36  
37  
38  
39  
40  
41  
42  
43  
44  
45  
46  
47

| Section and Topic                              | Item # | Checklist item                                                                                                                                                                                                                             | Location where item is reported |
|------------------------------------------------|--------|--------------------------------------------------------------------------------------------------------------------------------------------------------------------------------------------------------------------------------------------|---------------------------------|
| Availability of data, code and other materials | 27     | Report which of the following are publicly available and where they can be found: template data collection forms; data extracted from included studies; data used for all analyses; analytic code; any other materials used in the review. | Not applicable                  |

From: Page MJ, McKenzie JE, Bossuyt PM, Boutron I, Hoffmann TC, Mulrow CD, et al. The PRISMA 2020 statement: an updated guideline for reporting systematic reviews. *BMJ* 2021;372:n71. doi: 10.1136/bmj.n71

For more information, visit: <http://www.prisma-statement.org/>

For peer review only
