# Supplementary material for: Improving the perception of respect for and the dignity of inpatients: a systematic review
Source: HighWire-hosted journal article supplement (doi:10.1136/bmjopen-2021-059129), 2022-05-01
Supplement: bmjopen-2021-059129supp003_data_supplement.xlsx [file bmjopen-2021-059129supp003_data_supplement.xlsx]

## Sheet: Planilha1
Table 3 - CASP Cohort Studies Checklist (Critical Appraisal Skills Programme)		Skyman E et al (2014)
	Issue	2
	Recruitment	2		CRITICAL APPRAISAL SCORES
	Exposure	2		Individual item score (color and value)			(a) Did not cite explicitly the data collection date/time frame (e.g. month/year)
	Outcome	2		0 = not or inadequately addressed or applied	1 = adequately addressed or applied	2 = well addressed or applied
	Confounding factors identification	1		Total Score Appraisal by study design, color and value
	Confounding factors taken into account	1				Low quality	Moderate quality	High quality
	Follow up complete	2		Qualitative studies		0-7	8-14	15-20
	Follow up long enough	2		Cross-sectional studies		0-9	10-17	18-24
	Results	2		Cohort study		0-9	10-17	18-24
	Precision of the results	2		Quali-quantitative and convergent parallel mixed-method studies		0-4	2022-09-05	10-14
	Believe the results	2
	Results applied	1
	Results fit	1
	Implications for practice	1
	Total	23
	Country (year of research and data collection)	Sweden (2004/2011)
	Sample size	202
	Type of samples	2004: 92 patients (Card: 71, No card: 21); 2011: 110 patients (Card: 91, No card: 19)
	STRATEGIES, BEHAVIORS AND/OR OUTCOMES OF INTEREST	Disrespect and humiliation, Lack of knowledge, Unprofessionalism, Responsability not to spreading MRSA
	INTERVENTIONS TO ACHIEVE IMPROVEMENTS	To reduce uncertainty, offence, anger and discrimination; to educate patients and healthcare workers; to inform patients and health care providers; to manage patients fellings ; to preserve patients' dignity; to educate health care providers
	RESULTS	Patients felt pointed out in a negative way by receiving a notification card; a majority reported that they always or almost always had shown the card when seeking hospital or outpatient care, and for dental care the number was signifcantly higher in 2011 (57.14%) than in 2004 (30.98%) (p=0.004); 81% stated that it is good to have a card in 2004, and 62% in 2011; 38% reported health care workers …
	LIMITATIONS	Low response rates, patients with negative experiences may be more willing to to respond
